# Supplementary material for: BIMP‐Catalyzed 1,3‐Prototropic Shift for the Highly Enantioselective Synthesis of Conjugated Cyclohexenones
Source: PubMed Central journal article supplement (PMC7540019; doi:10.1002/anie.202006202), 2020-08-07
Supplement: ANIE-59-17417-s001.pdf [file ANIE-59-17417-s001.pdf]

Supporting Information

**BIMP-Catalyzed 1,3-Prototropic Shift for the Highly Enantioselective Synthesis of Conjugated Cyclohexenones\*\***

*Jonathan C. Golec, Eve M. Carter, John W. Ward, William G. Whittingham, Luis Simón, Robert S. Paton,\* and Darren J. Dixon\**

anie\_202006202\_sm\_miscellaneous\_information.pdf

## Supplementary information

### Table of contents

|                                                                                                               |     |
|---------------------------------------------------------------------------------------------------------------|-----|
| <b>1. Supplementary methods</b> .....                                                                         | 1   |
| 1.1 General information.....                                                                                  | 2   |
| 1.2 Synthesis of substrates for use in the BIMP catalysed prototropic shift.....                              | 3   |
| 1.2.1 Substrates prepared from Hagemann's ester.....                                                          | 7   |
| 1.2.2 Substrates prepared via cobalt catalysed Diels-Alder reaction.....                                      | 36  |
| 1.3 Optimisation of reaction conditions.....                                                                  | 42  |
| 1.4 The BIMP catalysed enantioselective prototropic shift of $\beta,\gamma$ -unsaturated cyclohexenones ..... | 45  |
| 1.5 Derivatisation of enantioenriched products.....                                                           | 66  |
| 1.6 Synthesis of catalysts.....                                                                               | 73  |
| 1.7 Deuterium labelling study.....                                                                            | 81  |
| <b>2. Supplementary Data</b>                                                                                  |     |
| 2.1 Single Crystal X-Ray Diffraction Data.....                                                                | 90  |
| 2.2 Copies of NMR spectra.....                                                                                | 93  |
| 2.3 Copies of HPLC traces.....                                                                                | 159 |
| 2.4 Computational data.....                                                                                   | 194 |
| <b>3. References</b> .....                                                                                    | 208 |

## 1.1 General information

### Atmosphere

All reactions were carried out under an atmosphere of Ar unless otherwise stated.

### Solvents and Reagents

Moisture sensitive reactions were carried out using solvents obtained from the MBRAUN-SPS solvent purification system (CH<sub>2</sub>Cl<sub>2</sub>, THF, pentane, toluene, DMF, Et<sub>2</sub>O) and often dried over 3Å molecular sieves. Reactions that were not deemed moisture sensitive were carried out using solvents taken from Winchester bottles. Reagents were purchased at reagent-grade from Acros Organics, Sigma-Aldrich, Alfa Aesar, and Fluorochem and used without further purification.

### Chromatography

TLC analysis was carried out using Merck aluminium backed DC60 F254 plates (particle size 0.2 mm). UV light was used to visualise spots which were often stained with KMnO<sub>4</sub>, vanillin or ninhydrin depending on the compound. Flash column chromatography was carried out using Sigma Aldrich silicagel 60 Å (particle size 43-60 μm) with the indicated solvent system.

### Data

Proton (<sup>1</sup>H) and carbon (<sup>13</sup>C) spectra were recorded on Bruker DPX200 (200 MHz) Bruker AVX400 (400/101 MHz), Bruker AVH400 (400/101 MHz), Bruker AVF400 (400/101 MHz), Bruker AVC500 (500/126 MHz), Bruker AVB500 (500/126 MHz), Bruker AVX500 (500/126 MHz) and Bruker AV600 (600/151) NMR spectrometers. Spectra were referenced with respect to the residual solvent peak (CHCl<sub>3</sub>: δ<sub>H</sub> 7.26, δ<sub>C</sub> 77.16 ppm; C<sub>6</sub>D<sub>5</sub>H: δ<sub>H</sub> 7.16, δ<sub>C</sub> 128.06 ppm; CD<sub>3</sub>COCD<sub>2</sub>H: δ<sub>H</sub> 2.05, δ<sub>C</sub> 29.84 ppm; CD<sub>2</sub>H<sub>2</sub>CN: δ<sub>H</sub> 1.94, δ<sub>C</sub> 1.32 ppm; C<sub>6</sub>D<sub>4</sub>HCD<sub>3</sub>: δ<sub>H</sub> 7.09, δ<sub>C</sub> 125.13 ppm; CHD<sub>2</sub>OD: δ<sub>H</sub> 3.31, δ<sub>C</sub> 49). Peak assignments were made based on chemical shifts, integrations, coupling constants, 2-D COSY and NOSY, HMBC, HSQC, nOe and NOESY. Peak multiplicities are described as singlet (s), doublet (d), triplet (t), pentet (p), or a combination e.g. doublet of doublets, or as a multiplet over a peak range. Some peaks are described as broad (b). Coupling constants are reported to the nearest 0.5 Hz and <sup>13</sup>C chemical shifts are given to the nearest 0.1 ppm.

High-resolution mass spectra (ESI) were recorded using a Bruker μTOF mass spectrometer.

Infrared spectra (IR) were recorded using a Bruker Tensor 27 FT-IR spectrometer as a thin film or powder sample. Selected maximum absorbances were reported in  $\nu_{max}$  (cm<sup>-1</sup>).

Melting points (MP) were obtained using a Leica Galen III Hot-stage melting point apparatus and microscope and on a Kofler hot block and are reported uncorrected.





### (4,4-dimethoxy-2-methylcyclohex-1-en-1-yl)methanol (**S2**)

ii. To a stirred solution of  $\text{LiAlH}_4$  (3.00 eq, 1.99 g, 52.6 mmol) in THF (29 ml) at 0 °C was added a solution of ethyl 4,4-dimethoxy-2-methylcyclohex-1-ene-1-carboxylate (**S1**) (1.00 eq, 4.00 g, 17.5 mmol) in THF (29 ml). The reaction was stirred at 0 °C and allowed to warm to room temperature over 2 h at which point completion was observed by TLC analysis (Pentane/EtOAc = 95/5). The reaction was diluted with  $\text{Et}_2\text{O}$  (40 ml) and cooled to 0 °C.  $\text{H}_2\text{O}$  (2 ml) was added slowly, followed by 15% aq. NaOH (2 ml) then  $\text{H}_2\text{O}$  (6 ml). The suspension was allowed to warm to room temperature with constant stirring over 15 min.  $\text{MgSO}_4$  was added and stirred for a further 15 min at which point the suspension was filtered. The solvent was removed *in vacuo* and the crude mixture purified by silica gel column chromatography ( $\text{Et}_2\text{O}$ ) to afford (4,4-dimethoxy-2-methylcyclohex-1-en-1-yl)methanol as a yellow oil in 79% yield (3.26 g).

$^1\text{H NMR}$  (400 MHz,  $\text{CDCl}_3$ )  $\delta$ (ppm): 4.11 (s, 2H,  $\text{CH}_2\text{OH}$ ), 3.21 (s, 6H,  $\text{C}(\text{OCH}_3)_2$ ), 2.25 – 2.15 (m, 4H,  $\text{CH}_2\text{CH}_2\text{C}(\text{OCH}_3)_2$  and  $\text{CCH}_2\text{C}(\text{OCH}_3)_2$ ), 1.86 – 1.76 (m, 2H,  $\text{CH}_2\text{CH}_2\text{C}(\text{OCH}_3)_2$ ), 1.69 (s, 3H,  $\text{CCH}_3$ ), 1.57 (bs, 1H, OH).

$^{13}\text{C NMR}$  (101 MHz,  $\text{CDCl}_3$ )  $\delta$ (ppm): 129.4 ( $\text{CCH}_2\text{OH}$ ), 127.4 ( $\text{CCH}_3$ ), 99.7 ( $\text{C}(\text{OCH}_3)_2$ ), 62.4 ( $\text{CH}_2\text{OH}$ ), 48.0 ( $\text{C}(\text{OCH}_3)_2$ ), 40.8 ( $\text{CCH}_2\text{C}(\text{OCH}_3)_2$ ), 28.8 ( $\text{CH}_2\text{CH}_2\text{C}(\text{OCH}_3)_2$ ), 25.8 ( $\text{CH}_2\text{CH}_2\text{C}(\text{OCH}_3)_2$ ), 18.8 ( $\text{CCH}_3$ ).

**IR** (film)  $\nu_{\text{max}}/\text{cm}^{-1}$ : 3398 (O-H), 2939, 2915, 2829 (C-H), 1679 (C=C), 1127, 1049 (C-O).

**HRMS** (ES+) exact mass calculated for  $[\text{M}+\text{Na}]^+$  ( $\text{C}_{10}\text{H}_{18}\text{NaO}_3$ ) requires  $m/z$  209.1148, found  $m/z$  209.1150.

### General procedure A:

For the addition of nucleophiles to (4,4-dimethoxy-2-methylcyclohex-1-en-1-yl)methanol (**S2**)

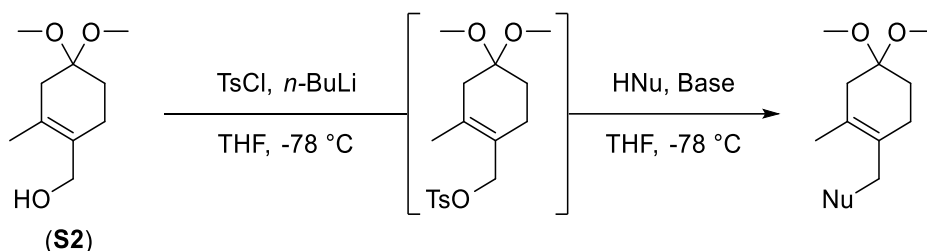

To a stirred solution of (4,4-dimethoxy-2-methylcyclohex-1-en-1-yl)methanol (**S2**) (1.00 eq) in THF (0.54 M) is added  $n\text{-BuLi}$  (1.07 eq, 2.5 M in hexanes) at  $-78\text{ }^\circ\text{C}$ . The reaction was stirred for 15 min at which point a solution of tosyl chloride (1.05 eq) in THF (0.27 M wrt. alcohol) was added. The

solution was stirred for a further 30 min at -78 °C. A pre-prepared solution of the desired nucleophile (2.00 eq) and base (2.00 eq) in THF (0.27 M wrt. alcohol) was then added dropwise to the tosylate. The solution was then warmed to 0 °C and stirred until deemed complete by TLC analysis. The reaction mixture was quenched with sat. aq. K<sub>2</sub>CO<sub>3</sub> solution and extracted with Et<sub>2</sub>O three times. The combined organic phases were washed with H<sub>2</sub>O and brine, dried over MgSO<sub>4</sub>, and filtered. To the organic phase was added solid K<sub>2</sub>CO<sub>3</sub> and the solvent was removed under a stream of N<sub>2</sub>. The resultant residue was purified by silica gel column chromatography to yield the desired product.

\*Compounds synthesised by this method were found to be extremely sensitive to acidic conditions (NMR spectra obtained in CDCl<sub>3</sub> often resulted in rapid decomposition) as well as heat (solvent was often removed under a stream of nitrogen rather than *in vacuo*).

### General procedure B:

#### For the deprotection of acid sensitive substrates

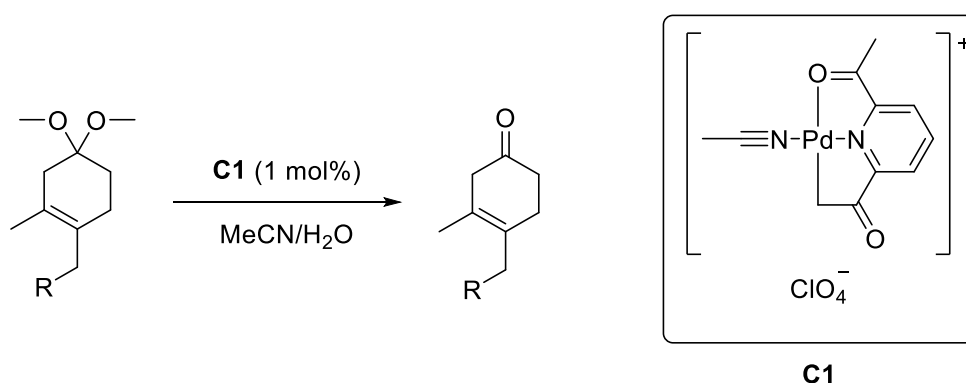

According to a literature procedure,<sup>1a-b</sup> to a stirred solution of the desired protected substrate in wet acetonitrile (0.1 M) was added **C1** (0.01 eq.). The reaction was stirred until deemed complete by TLC analysis and additional catalyst was added if necessary. The reaction mixture was transferred directly onto silica gel and purified by silica gel column chromatography to yield the desired product.

### General procedure C:

#### For the deprotection of substrates not sensitive to acid

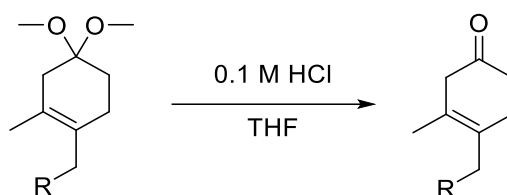

To a stirred solution of the desired protected substrate in THF (0.14 M) was added an equal volume of 0.1 M HCl. The solution was stirred until deemed complete by TLC analysis at which point the reaction was quenched with sat. aq. K<sub>2</sub>CO<sub>3</sub> solution. The aqueous phase was extracted with Et<sub>2</sub>O and the combined organic phases were washed with brine, dried over Na<sub>2</sub>SO<sub>4</sub>, filtered and concentrated *in vacuo*. The crude products were then purified by silica gel column chromatography to yield the desired products.

### 1.2.1 Substrates prepared from Hagemann's ester

#### (((4,4-dimethoxy-2-methylcyclohex-1-en-1-yl)methoxy)methyl)benzene (S3)

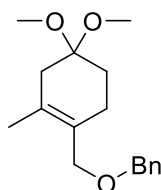

To a suspension of 60% NaH (0.215 g, 5.37 mmol, 2.00 eq) in THF (3.0 ml) at 0 °C was added a solution of (4,4-dimethoxy-2-methylcyclohex-1-en-1-yl)methanol (**S2**) (500 mg, 2.69 mmol, 1.00 eq) in THF (3.7 ml). The suspension was stirred for 10 min at which point benzyl bromide (0.48 ml, 4.03 mmol, 1.50 eq) was added followed by TBAI (99.0 mg, 0.270 mmol, 0.100 eq). The reaction was stirred until completion was observed by TLC analysis (Et<sub>2</sub>O). The reaction was quenched with sat. aq. NH<sub>4</sub>Cl (10 ml) and extracted with EtOAc (3 x 30 ml). The combined organic extracts were washed with brine, dried over Na<sub>2</sub>SO<sub>4</sub>, filtered, and the solvent was removed *in vacuo*. The crude mixture was purified by silica gel column chromatography (pentane/EtOAc = 9/1) to afford the title compound as a yellow oil in 77% yield (575 mg).

**<sup>1</sup>H NMR** (400 MHz, CDCl<sub>3</sub>) δ(ppm): 7.33 – 7.17 (m, 5H, ArH), 4.39 (s, 2H, CH<sub>2</sub>Ph), 3.94 (s, 2H, CH<sub>2</sub>OCH<sub>2</sub>Ph), 3.16 (s, 6H, C(OCH<sub>3</sub>)<sub>2</sub>), 2.18 (td, *J* = 2.0, 1.0 Hz, 2H, CCH<sub>2</sub>C(OCH<sub>3</sub>)<sub>2</sub>), 2.13 (ddt, *J* = 6.5, 4.5, 2.0 Hz, 2H, CH<sub>2</sub>CH<sub>2</sub>C(OCH<sub>3</sub>)<sub>2</sub>), 1.77 (t, *J* = 6.5, 2H, (CH<sub>2</sub>CH<sub>2</sub>C(OCH<sub>3</sub>)<sub>2</sub>), 1.66 – 1.56 (m, 3H, CCH<sub>3</sub>).

**<sup>13</sup>C NMR** (101 MHz, CDCl<sub>3</sub>) δ(ppm): 138.8 (ArC), 128.5 (CCH<sub>2</sub>OBn), 128.5 (ArCH), 127.9 (ArCH), 127.6 (ArCH), 127.0 (CCH<sub>3</sub>), 99.7 (C(OCH<sub>3</sub>)<sub>2</sub>), 71.9 (CH<sub>2</sub>Ph), 69.3 (CH<sub>2</sub>O), 48.0 (OCH<sub>3</sub>), 40.9 (CH<sub>2</sub>CCH<sub>3</sub>), 28.7 (CH<sub>2</sub>CH<sub>2</sub>C(OCH<sub>3</sub>)<sub>2</sub>), 26.0 (CH<sub>2</sub>CH<sub>2</sub>C(OCH<sub>3</sub>)<sub>2</sub>), 19.1 (CCH<sub>3</sub>).

**IR** (film)  $\nu_{max}/cm^{-1}$ : 3030, 2936, 2856, 2827 (C-H), 1095, 1053 (C-O).

**HRMS** (ES<sup>+</sup>) exact mass calculated for [M+Na]<sup>+</sup> (C<sub>17</sub>H<sub>24</sub>NaO<sub>3</sub>)<sup>+</sup> requires *m/z* 299.1617, found *m/z* 299.1618.

#### 4,4-dimethoxy-1-(methoxymethyl)-2-methylcyclohex-1-ene (S4)

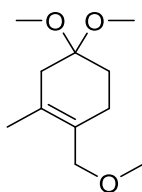

To a solution of (4,4-dimethoxy-2-methylcyclohex-1-en-1-yl)methanol (**S2**) (200 mg, 1.07 mmol, 1.00 eq) in DMF (1.10 ml) at 0 °C was added 60% NaH (64.4 mg, 1.61 mmol, 1.50 eq). The solution was stirred for 15 min at which point methyl iodide (0.130 ml, 2.15 mmol, 2.00 eq) was added. Additional DMF (0.50 ml) was added to aid solubility. The reaction was stirred overnight, quenched with sat. aq. NH<sub>4</sub>Cl (10 ml) and extracted with Et<sub>2</sub>O (3 x 10 ml). The combined organic layers were washed with H<sub>2</sub>O (3 x 10 ml), brine, dried over Na<sub>2</sub>SO<sub>4</sub>, filtered and concentrated *in vacuo*. The crude product was purified by silica gel column chromatography (pentane/Et<sub>2</sub>O = 95/5 to 90/10) to provide the title compound as a colourless oil in 68% yield (145 mg).

**<sup>1</sup>H NMR** (500 MHz, Benzene-*d*<sub>6</sub>) δ(ppm): 3.83 (s, 2H, CH<sub>2</sub>O), 3.11 (s, 3H, CH<sub>3</sub>OCH<sub>2</sub>), 3.08 (s, 6H, C(OCH<sub>3</sub>)<sub>2</sub>), 2.28 – 2.22 (m, 2H, CH<sub>2</sub>CH<sub>2</sub>C=CCH<sub>3</sub>), 2.27 – 2.22 (m, 2H, CH<sub>2</sub>CCH<sub>3</sub>), 1.83 (t, *J* = 6.5, 2H, CH<sub>2</sub>CH<sub>2</sub>C=CCH<sub>3</sub>), 1.53 (s, 3H, CCH<sub>3</sub>).

**<sup>13</sup>C NMR** (126 MHz, Benzene-*d*<sub>6</sub>) δ(ppm): 127.7 (one of C=C), 127.6 (one of C=C), 99.8 (C(OCH<sub>3</sub>)<sub>2</sub>), 71.8 (CH<sub>2</sub>OCH<sub>3</sub>), 57.3 (CH<sub>2</sub>OCH<sub>3</sub>), 47.5 (C(OCH<sub>3</sub>)<sub>2</sub>), 40.9 (CH<sub>2</sub>CCH<sub>3</sub>), 29.3 (CH<sub>2</sub>CH<sub>2</sub>C=CCH<sub>3</sub>), 26.4 (CH<sub>2</sub>CH<sub>2</sub>C=CCH<sub>3</sub>), 18.8 (CCH<sub>3</sub>).

**IR** (film)  $\nu_{\text{max}}/\text{cm}^{-1}$ : 2921, 2826 (C-H), 1681 (C=C), 1130 (C-O).

**HRMS** (ES<sup>+</sup>) exact mass calculated for [M+Na]<sup>+</sup> (C<sub>11</sub>H<sub>20</sub>NaO<sub>3</sub>)<sup>+</sup> requires *m/z* 223.1316, found *m/z* 223.1305.

### 1-((allyloxy)methyl)-4,4-dimethoxy-2-methylcyclohex-1-ene (S5)

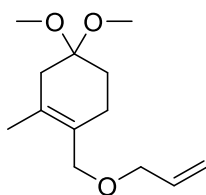

To a solution of (4,4-dimethoxy-2-methylcyclohex-1-en-1-yl)methanol (**S2**) (100 mg, 0.540 mmol, 1.00 eq) in THF (1.20 ml) at 0 °C was added 60% NaH (23.6 mg, 0.590 mmol, 1.10 eq). The resulting suspension was stirred for 30 min at which point TBAI (10.0 mg, 27  $\mu$ mol, 0.05 eq) and allyl bromide (51.0  $\mu$ l, 0.590 mmol, 1.10 eq) were added. The reaction was allowed to warm to room temperature and stirred overnight at which point H<sub>2</sub>O (10 ml) was added. The aqueous layer was extracted with EtOAc (3 x 20 ml). The combined extracts were washed with H<sub>2</sub>O (20 ml), brine, dried over Na<sub>2</sub>SO<sub>4</sub>, and the solvent was removed *in vacuo*. The crude reaction mixture was purified by silica gel column chromatography (pentane/Et<sub>2</sub>O = 90/10) to afford the title compound as yellow oil in 53% yield (64.6 mg).

**<sup>1</sup>H NMR** (500 MHz, Acetone-*d*<sub>6</sub>)  $\delta$ (ppm): 5.90 (ddt,  $J = 17.5, 10.5, 5.5$  Hz, 1H,  $\underline{\text{C}}\underline{\text{H}}=\underline{\text{C}}\underline{\text{H}}_2$ ), 5.24 (dq,  $J = 17.5, 2.0$  Hz, 1H, one of  $\text{C}=\underline{\text{C}}\underline{\text{H}}_A\underline{\text{H}}_B$ ), 5.10 (dq,  $J = 10.5, 1.5$  Hz, 1H, one of  $\text{C}=\underline{\text{C}}\underline{\text{H}}_A\underline{\text{H}}_B$ ), 3.95 (s, 2H,  $\underline{\text{C}}\underline{\text{H}}_2\underline{\text{O}}\underline{\text{C}}\underline{\text{H}}_2\underline{\text{C}}\underline{\text{H}}$ ), 3.88 (dt,  $J = 5.5, 1.5$  Hz, 2H,  $\underline{\text{O}}\underline{\text{C}}\underline{\text{H}}_2\underline{\text{C}}\underline{\text{H}}$ ), 3.15 (s, 6H,  $\text{C}(\underline{\text{O}}\underline{\text{C}}\underline{\text{H}}_3)_2$ ), 2.18 (s, 2H,  $\text{C}\underline{\text{H}}_3\underline{\text{C}}\underline{\text{C}}\underline{\text{H}}_2$ ), 2.10 (ddt,  $J = 7.0, 4.5, 2.0$  Hz, 2H,  $\underline{\text{C}}\underline{\text{H}}_2\underline{\text{C}}\underline{\text{H}}_2\underline{\text{C}}(\underline{\text{O}}\underline{\text{C}}\underline{\text{H}}_3)_2$ ), 1.74 (t,  $J = 6.5$  Hz, 2H,  $\text{C}\underline{\text{H}}_2\underline{\text{C}}\underline{\text{H}}_2\underline{\text{C}}(\underline{\text{O}}\underline{\text{C}}\underline{\text{H}}_3)_2$ ), 1.65 (s,  $J = 2.0$  Hz, 3H,  $\text{C}\underline{\text{C}}\underline{\text{H}}_3$ ).

**<sup>13</sup>C NMR** (126 MHz, Acetone-*d*<sub>6</sub>)  $\delta$ (ppm): 136.7 ( $\underline{\text{C}}\underline{\text{H}}=\underline{\text{C}}\underline{\text{H}}_2$ ), 128.3 ( $\underline{\text{C}}\underline{\text{C}}\underline{\text{H}}_3$ ), 127.8 ( $\underline{\text{C}}=\underline{\text{C}}\underline{\text{C}}\underline{\text{H}}_3$ ), 116.1 ( $\text{C}\underline{\text{H}}=\underline{\text{C}}\underline{\text{H}}_2$ ), 100.1 ( $\underline{\text{C}}(\underline{\text{O}}\underline{\text{C}}\underline{\text{H}}_3)_2$ ), 70.9 ( $\underline{\text{C}}\underline{\text{H}}_2\underline{\text{C}}\underline{\text{H}}=\underline{\text{C}}\underline{\text{H}}_2$ ), 69.7 ( $\underline{\text{C}}\underline{\text{H}}_2\underline{\text{O}}\underline{\text{C}}\underline{\text{H}}_2\underline{\text{C}}\underline{\text{H}}=\underline{\text{C}}\underline{\text{H}}_2$ ), 47.7 ( $\text{C}(\underline{\text{O}}\underline{\text{C}}\underline{\text{H}}_3)_2$ ), 41.2 ( $\underline{\text{C}}\underline{\text{C}}\underline{\text{H}}_2\underline{\text{C}}(\underline{\text{O}}\underline{\text{C}}\underline{\text{H}}_3)_2$ ), 29.5 ( $\underline{\text{C}}\underline{\text{H}}_2\underline{\text{C}}\underline{\text{H}}_2\underline{\text{C}}(\underline{\text{O}}\underline{\text{C}}\underline{\text{H}}_3)_2$ ), 26.6 ( $\underline{\text{C}}\underline{\text{H}}_2\underline{\text{C}}\underline{\text{H}}_2\underline{\text{C}}(\underline{\text{O}}\underline{\text{C}}\underline{\text{H}}_3)_2$ ), 18.9 ( $\underline{\text{C}}\underline{\text{C}}\underline{\text{H}}_3$ ).

**IR** (film)  $\nu_{\text{max}}/\text{cm}^{-1}$ : 2937, 2828 (C-H), 1647 (C=CH<sub>2</sub>), 1095 (C-O).

**HRMS** (ES<sup>+</sup>) exact mass calculated for  $[\text{M}+\text{Na}]^+$  (C<sub>13</sub>H<sub>22</sub>NaO<sub>3</sub>)<sup>+</sup> requires  $m/z$  249.1461, found  $m/z$  249.1461.

#### 4,4-dimethoxy-2-methyl-1-(((3-methylbut-2-en-1-yl)oxy)methyl)cyclohex-1-ene (S6)

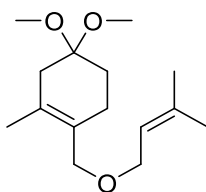

To a stirred solution of (4,4-dimethoxy-2-methylcyclohex-1-en-1-yl)methanol (**S2**) (500 mg, 2.68 mmol, 1.00 eq) in THF (2.7 ml) at 0 °C was added 60% NaH (118 mg, 2.95 mmol, 1.10 eq). The suspension was stirred for 30 min and allowed to warm to room temperature over a further 30 min. The suspension was cooled back down to 0 °C and 3,3-dimethylallyl bromide (0.310 ml, 2.68 mmol, 1.00 eq) was added dropwise. The reaction was stirred overnight and quenched with sat. aq. NH<sub>4</sub>Cl (5 ml). The aqueous phase was extracted with Et<sub>2</sub>O (3 x 30 ml) and the organic phases were combined, washed with brine, dried over Na<sub>2</sub>SO<sub>4</sub>, filtered and concentrated *in vacuo*. The crude product was purified by silica gel column chromatography (pentane/Et<sub>2</sub>O = 9/1) to provide the title compound as a colourless oil in 70% yield (475 mg).

<sup>1</sup>H NMR (600 MHz, CDCl<sub>3</sub>) δ(ppm): 5.52 (tp, *J* = 6.5, 1.5 Hz, 1H, CH=C(CH<sub>3</sub>)<sub>2</sub>), 3.96 (s, 2H, CH<sub>2</sub>OCH<sub>2</sub>CH=C(CH<sub>3</sub>)<sub>2</sub>), 3.94 (d, *J* = 6.5 Hz, 2H, CH<sub>2</sub>OCH<sub>2</sub>CH=C(CH<sub>3</sub>)<sub>2</sub>), 3.09 (s, 6H, C(OCH<sub>3</sub>)<sub>2</sub>), 2.33 – 2.27 (m, 2H, CH<sub>2</sub>CH<sub>2</sub>C(OCH<sub>3</sub>)<sub>2</sub>), 2.22 (s, 2H, CCH<sub>2</sub>C(OCH<sub>3</sub>)<sub>2</sub>), 1.85 (t, *J* = 6.5 Hz, 2H, CH<sub>2</sub>CH<sub>2</sub>C(OCH<sub>3</sub>)<sub>2</sub>), 1.60 (s, 3H, one of CH=C(CH<sub>3</sub>)<sub>A</sub>(CH<sub>3</sub>)<sub>B</sub>), 1.57 (s, 3H, CH<sub>3</sub>CCH<sub>2</sub>C(OCH<sub>3</sub>)<sub>2</sub>), 1.52 (s, 3H, one of CH=C(CH<sub>3</sub>)<sub>A</sub>(CH<sub>3</sub>)<sub>B</sub>).

<sup>13</sup>C NMR (151 MHz, CDCl<sub>3</sub>) δ(ppm): 135.3 (C(CH<sub>3</sub>)<sub>2</sub>), 128.4 (C=C(CH<sub>2</sub>)(CH<sub>2</sub>O)), 127.4 (C=C(CH<sub>2</sub>)(CH<sub>2</sub>O)), 123.0 (CH=C), 99.9 (C(OCH<sub>3</sub>)<sub>2</sub>), 69.4 (C=C(CH<sub>2</sub>)(CH<sub>2</sub>O)), 66.4 (OCH<sub>2</sub>CH=C), 47.5 (C(OCH<sub>3</sub>)<sub>2</sub>), 41.0 (CCH<sub>2</sub>C(OCH<sub>3</sub>)<sub>2</sub>), 29.4 (CH<sub>2</sub>CH<sub>2</sub>C(OCH<sub>3</sub>)<sub>2</sub>), 26.5 (CH<sub>2</sub>CH<sub>2</sub>C(OCH<sub>3</sub>)<sub>2</sub>), 25.7 (one of CH=C(CH<sub>3</sub>)<sub>A</sub>(CH<sub>3</sub>)<sub>B</sub>), 18.9 (CH<sub>3</sub>CCH<sub>2</sub>C(OCH<sub>3</sub>)<sub>2</sub>), 18.0 (one of CH=C(CH<sub>3</sub>)<sub>A</sub>(CH<sub>3</sub>)<sub>B</sub>).

IR (film) ν<sub>max</sub>/cm<sup>-1</sup>: 2914 (C-H), 1677 (C=C), 1096, 1054 (C-O).

HRMS (ES+) exact mass calculated for [M+Na]<sup>+</sup> (C<sub>15</sub>H<sub>26</sub>NaO<sub>3</sub>)<sup>+</sup> requires *m/z* 277.1774, found *m/z* 277.1774.

#### 4,4-dimethoxy-2-methyl-1-((prop-2-yn-1-yloxy)methyl)cyclohex-1-ene (S7)

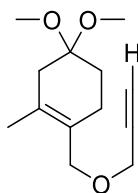

According to a modified literature procedure,<sup>2</sup> 60% NaH (171 mg, 4.30 mmol, 4.00 eq) was added to a stirred solution of (4,4-dimethoxy-2-methylcyclohex-1-en-1-yl)methanol (**S2**) (200 mg, 1.07 mmol, 1.00 eq) in DMF (6.90 ml) at 0 °C. The solution was stirred for 1 h at which point propargyl bromide (80% in toluene, 0.460 ml, 4.30 mmol, 4.00 eq). The reaction was allowed to warm to room temperature over 12 h at which point H<sub>2</sub>O (10 ml) was added. The aqueous layer was extracted with EtOAc (3 x 20 ml). The combined extracts were washed with H<sub>2</sub>O (3 x 20 ml), brine, dried over Na<sub>2</sub>SO<sub>4</sub> and the solvent was removed *in vacuo*. The crude reaction mixture was purified by silica gel column chromatography (pentane/Et<sub>2</sub>O = 85/15) to afford the title compound as a colourless oil in 78% yield (188 mg).

<sup>1</sup>H NMR (500 MHz, Acetone-*d*<sub>6</sub>) δ(ppm): 4.06 (d, *J* = 2.5 Hz, 2H, CH<sub>2</sub>C≡C), 4.03 (s, 2H, CH<sub>2</sub>OCH<sub>2</sub>C≡C), 3.15 (s, 6H, C(OCH<sub>3</sub>)<sub>2</sub>), 2.91 (t, *J* = 2.5 Hz, 1H, C≡CH), 2.19 (s, 2H, CCH<sub>2</sub>C(OCH<sub>3</sub>)<sub>2</sub>), 2.08 (m, 2H, CH<sub>2</sub>CH<sub>2</sub>C(OCH<sub>3</sub>)<sub>2</sub>), 1.74 (t, *J* = 6.5 Hz, 2H, CH<sub>2</sub>CH<sub>2</sub>C(OCH<sub>3</sub>)<sub>2</sub>), 1.69 (s, 3H, CCH<sub>3</sub>).

<sup>13</sup>C NMR (126 MHz, Acetone-*d*<sub>6</sub>) δ(ppm): 128.7 (CCH<sub>3</sub>), 126.1 (C=CCH<sub>3</sub>), 99.2 (C(OCH<sub>3</sub>)<sub>2</sub>), 80.4 (C≡CH), 74.6 (C≡CH), 68.1 (CH<sub>2</sub>OCH<sub>2</sub>C≡C), 55.9 (CH<sub>2</sub>OCH<sub>2</sub>C≡C), 46.8 (C(OCH<sub>3</sub>)<sub>2</sub>), 40.3 (CCH<sub>2</sub>C(OCH<sub>3</sub>)<sub>2</sub>), 28.6 (CH<sub>2</sub>CH<sub>2</sub>C(OCH<sub>3</sub>)<sub>2</sub>), 25.8 (CH<sub>2</sub>CH<sub>2</sub>C(OCH<sub>3</sub>)<sub>2</sub>), 18.0 (CCH<sub>3</sub>).

IR (film) ν<sub>max</sub>/cm<sup>-1</sup>: 3252 (C≡C-H), 2940, 2829 (C-H), 2113 (C≡C), 1680 (C=C), 1258, 1131 (C-O).

HRMS (ES+) exact mass calculated for [M+Na]<sup>+</sup> (C<sub>13</sub>H<sub>20</sub>NaO<sub>3</sub>)<sup>+</sup> requires *m/z* 247.1305, found *m/z* 247.1304.





**tert-butyl ((4,4-dimethoxy-2-methylcyclohex-1-en-1-yl)methyl)(phenyl)carbamate (S9)**

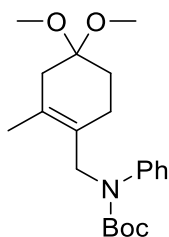

The title compound was prepared according to general procedure **A** from (4,4-dimethoxy-2-methylcyclohex-1-en-1-yl)methanol (**S2**) (400 mg, 2.15 mmol) with *tert*-butyl phenylcarbamate as a nucleophile and *n*-BuLi (2.5 M in hexanes) as the base. The compound was purified by silica gel column chromatography (pentane/Et<sub>2</sub>O = 85/15) and obtained as a colourless oil in 50% yield (386 mg).

**<sup>1</sup>H NMR** (400 MHz, Benzene-*d*<sub>6</sub>) δ(ppm): 7.18 – 7.04 (m, 4H, ArH), 6.99 – 6.91 (m, 1H, ArH), 4.35 (s, 2H, CH<sub>2</sub>N), 3.02 (s, 6H, C(OCH<sub>3</sub>)<sub>2</sub>), 2.26 (m, 2H, CH<sub>2</sub>CH<sub>2</sub>C(OCH<sub>3</sub>)<sub>2</sub>), 2.03 (s, 2H, CH<sub>2</sub>CCH<sub>3</sub>), 1.76 (t, *J* = 6.5 Hz, 2H, CH<sub>2</sub>CH<sub>2</sub>C(OCH<sub>3</sub>)<sub>2</sub>), 1.40 (s, 9H, C(CH<sub>3</sub>)<sub>3</sub>), 1.20 (s, 3H, CH<sub>2</sub>CCH<sub>3</sub>).

**<sup>13</sup>C NMR** (101 MHz, Benzene-*d*<sub>6</sub>) δ(ppm): 155.0 (C=O), 143.0 (ArC), 128.6 (ArCH), 127.4 (one of C=C), 126.9 (one of C=C), 126.1 (ArCH), 99.7 (C(OCH<sub>3</sub>)<sub>2</sub>), 79.5 (C(CH<sub>3</sub>)<sub>3</sub>), 50.4 (CH<sub>2</sub>N), 47.5 (C(OCH<sub>3</sub>)<sub>2</sub>), 40.7 (CH<sub>2</sub>CCH<sub>3</sub>), 29.3 (CH<sub>2</sub>CH<sub>2</sub>C(OCH<sub>3</sub>)<sub>2</sub>), 28.4 (C(CH<sub>3</sub>)<sub>3</sub>), 26.5 (CH<sub>2</sub>CH<sub>2</sub>C(OCH<sub>3</sub>)<sub>2</sub>), 18.6 (CH<sub>2</sub>CCH<sub>3</sub>) (one ArCH is hidden beneath the solvent peak).

**IR** (film)  $\nu_{\max}/\text{cm}^{-1}$ : 2936, 2828 (C-H), 1694 (C=O), 1597, 1496 (C=C), 1127 (C-O).

**HRMS** (ES<sup>+</sup>) exact mass calculated for [M+Na]<sup>+</sup> (C<sub>21</sub>H<sub>31</sub> NNaO<sub>4</sub>)<sup>+</sup> requires *m/z* 384.2145, found *m/z* 384.2146.

**tert-butyl ((4,4-dimethoxy-2-methylcyclohex-1-en-1-yl)methyl)(prop-2-yn-1-yl)carbamate (S10)**

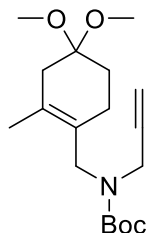

The title compound was prepared according to general procedure **A** from (4,4-dimethoxy-2-methylcyclohex-1-en-1-yl)methanol (**S2**) (400 mg, 2.15 mmol) with *tert*-butyl prop-2-yn-1-ylcarbamate as a nucleophile and KHMDS (0.5 M in toluene) as the preferred base. The compound was purified by silica gel column chromatography (pentane/Et<sub>2</sub>O = 90/10 to 80/20) and obtained as a colourless oil in 44% yield (304 mg).

**<sup>1</sup>H NMR** (500 MHz, Acetone-*d*<sub>6</sub>) δ(ppm): 4.02 (s, 2H, CH<sub>2</sub>NCH<sub>2</sub>C≡CH), 3.90 (bs, 2H, CH<sub>2</sub>NCH<sub>2</sub>C≡CH), 3.15 (s, 6H, C(OCH<sub>3</sub>)<sub>2</sub>), 2.69 (t, *J* = 2.5 Hz, 1H, C≡CH), 2.21 (bs, 2H, CH<sub>3</sub>CCH<sub>2</sub>C(OCH<sub>3</sub>)<sub>2</sub>), 1.99 – 1.92 (m, 2H, CH<sub>2</sub>CH<sub>2</sub>C(OCH<sub>3</sub>)<sub>2</sub>), 1.78 – 1.70 (m, 5H, CH<sub>2</sub>CH<sub>2</sub>C(OCH<sub>3</sub>)<sub>2</sub> and CH<sub>3</sub>C=C), 1.46 (s, 9H, C(CH<sub>3</sub>)<sub>3</sub>).

**<sup>13</sup>C NMR** (126 MHz, Acetone-*d*<sub>6</sub>) δ(ppm): 155.6 (C=O), 128.9 (C=CCH<sub>3</sub>), 126.1 (C=CCH<sub>3</sub>), 100.1 (C(OCH<sub>3</sub>)<sub>2</sub>), 80.9 (C≡CH), 80.2 (C(CH<sub>3</sub>)<sub>3</sub>), 72.5 (C≡CH), 47.8 (C(OCH<sub>3</sub>)<sub>2</sub>), 46.6 (CH<sub>2</sub>NCH<sub>2</sub>C≡CH), 41.3 (CH<sub>2</sub>CCH<sub>3</sub>), 34.7 (CH<sub>2</sub>C≡CH), 29.4 (CH<sub>2</sub>CH<sub>2</sub>C(OCH<sub>3</sub>)<sub>2</sub>), 28.5 (C(CH<sub>3</sub>)<sub>3</sub>), 26.1 (CH<sub>2</sub>CH<sub>2</sub>C(OCH<sub>3</sub>)<sub>2</sub>), 18.9 (C=CCH<sub>3</sub>).

**IR** (film) ν<sub>max</sub>/cm<sup>-1</sup>: 3251 (C≡C-H), 2975 (C-H), 1694 (C=O), 1126 (C-O).

**HRMS** (ES<sup>+</sup>) exact mass calculated for [M+Na]<sup>+</sup> (C<sub>18</sub>H<sub>29</sub>NNaO<sub>4</sub>)<sup>+</sup> requires *m/z* 346.1989, found *m/z* 346.1987.

**tert-butyl ((4,4-dimethoxy-2-methylcyclohex-1-en-1-yl)methyl)(1,3-dioxoisindolin-2-yl)carbamate (S11)**

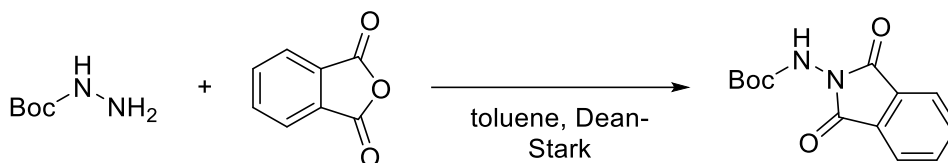

i. According to a modified literature procedure,<sup>4</sup> phthalic anhydride (5.60 g, 37.8 mmol, 1.00 eq) was added to a stirred solution of *tert*-butyl carbamate (5.00 g, 37.8 g, 1.00 eq) in toluene (76 ml). The solution was refluxed under Dean-Stark conditions until no more H<sub>2</sub>O was liberated at which point the solution was cooled and concentrated *in vacuo*. The crude product was purified by silica gel column chromatography (pentane/EtOAc = 85/15 to 80/20 to 70/30 to 40/60 to MeOH). The product crashed out on the column after 3.31 g was isolated as a white solid (33%). The remaining product was removed from the column by with MeOH and left to slowly crystalize. The crystals were filtered and washed with MeOH to provide the remainder of the product as colourless crystals in 35% yield (3.49 g) (total yield = 69%, 6.80 g).

<sup>1</sup>H NMR (400 MHz, CDCl<sub>3</sub>) δ(ppm): 7.89 (dt, *J* = 7.5, 3.5 Hz, 2H, ArH), 7.77 (dd, *J* = 5.5, 3.0 Hz, 2H, ArH), 6.72 (s, 1H, NH), 1.49 (s, 9H, C(CH<sub>3</sub>)<sub>3</sub>).

<sup>13</sup>C NMR (101 MHz, CDCl<sub>3</sub>) δ(ppm): 165.6 (N(C=O)<sub>2</sub>), 153.6 (OC(=O)), 134.8 (ArCH), 130.1 (ArC), 124.1 (ArCH), 83.2 (OC(CH<sub>3</sub>)<sub>3</sub>), 28.2 (OC(CH<sub>3</sub>)<sub>3</sub>).

Data is consistent with that published in the literature.<sup>4</sup>

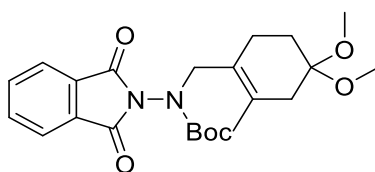

ii. The title compound was prepared according to general procedure **A** from (4,4-dimethoxy-2-methylcyclohex-1-en-1-yl)methanol (**S2**) (400 mg, 2.15 mmol) with *tert*-butyl (1,3-dioxoisindolin-2-yl)carbamate as a nucleophile and KHMDS (0.5 M in toluene) as the base. The compound was purified by silica gel column chromatography (pentane/EtOAc = 70/30) and obtained as an unstable white solid (foam) in 61% yield (565 mg) which was quickly taken on to the next step.

**tert-butyl ((tert-butyldimethylsilyl)oxy)((4,4-dimethoxy-2-methylcyclohex-1-en-1-yl)methyl)carbamate (S12)**

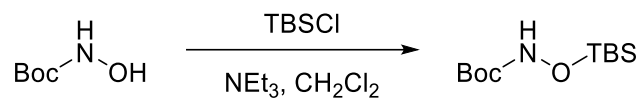

ii. According to a literature procedure,<sup>5</sup> TBSCl (3.40 g, 22.5 mmol, 1.00 eq) was added to a stirred solution of tert-butyl hydroxycarbamate (3.00 g, 22.5 mmol, 1.00 eq) and NEt<sub>3</sub> (3.45 ml, 24.8 mmol, 1.10 eq) in CH<sub>2</sub>Cl<sub>2</sub> (30 ml) at 0 °C. The reaction was stirred overnight and allowed to warm to room temperature. H<sub>2</sub>O (30 ml) was added and the phases were partitioned. The aqueous layer was extracted with CH<sub>2</sub>Cl<sub>2</sub> (2 x 30 ml). The combined organic extracts were washed with brine, dried over MgSO<sub>4</sub>, filtered and concentrated *in vacuo* to provide tert-butyl ((tert-butyldimethylsilyl)oxy)carbamate as a white solid in 83% yield (4.65 g).

**<sup>1</sup>H NMR** (400 MHz, CDCl<sub>3</sub>) δ(ppm): 6.75 (s, 1H, NH), 1.47 (s, 9H, OC(CH<sub>3</sub>)<sub>3</sub>), 0.94 (s, 9H, SiC(CH<sub>3</sub>)<sub>3</sub>), 0.15 (s, 6H, Si(CH<sub>3</sub>)<sub>2</sub>).

**<sup>13</sup>C NMR** (101 MHz, CDCl<sub>3</sub>) δ(ppm): 157.9 (C=O), 81.5 (OC(CH<sub>3</sub>)<sub>3</sub>), 28.2 (one of C(CH<sub>3</sub>)<sub>3</sub>), 25.9 (one of C(CH<sub>3</sub>)<sub>3</sub>), 18.0 (SiC(CH<sub>3</sub>)<sub>3</sub>), -5.8 (Si(CH<sub>3</sub>)<sub>2</sub>).

**IR** (powder)  $\nu_{\text{max}}/\text{cm}^{-1}$ : 3279 (N-H), 2931, 2896, 2859 (C-H), 1692 (C=O), 1098 (C-O).

Data is consistent with that published in the literature.<sup>5</sup>

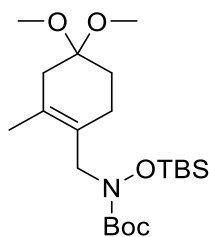

iii. The title compound was prepared according to general procedure **A** from (4,4-dimethoxy-2-methylcyclohex-1-en-1-yl)methanol (**S2**) (400 mg, 2.15 mmol) with tert-butyl ((tert-butyldimethylsilyl)oxy)carbamate as a nucleophile and KHMDS (0.5 M in toluene) as the preferred base. The compound was purified by silica gel column chromatography (pentane/Et<sub>2</sub>O = 90/10) and obtained as a colourless oil in 41% yield (365 mg).

**<sup>1</sup>H NMR** (400 MHz, Acetone-*d*<sub>6</sub>) δ(ppm): 4.11 (s, 2H, CH<sub>2</sub>N), 3.14 (s, 6H, C(OCH<sub>3</sub>)<sub>2</sub>), 2.17 (s, 2H, CH<sub>2</sub>CCH<sub>3</sub>), 2.11 – 2.06 (m, 2H, CH<sub>2</sub>CH<sub>2</sub>C(OCH<sub>3</sub>)<sub>3</sub>), 1.74 (t, *J* = 6.5 Hz, 2H, CH<sub>2</sub>CH<sub>2</sub>C(OCH<sub>3</sub>)<sub>3</sub>), 1.66 (s, 3H, C=CCH<sub>3</sub>), 1.47 (s, 9H, OC(CH<sub>3</sub>)<sub>3</sub>), 0.94 (s, 9H, SiC(CH<sub>3</sub>)<sub>3</sub>), 0.15 (s, 6H, Si(CH<sub>3</sub>)<sub>2</sub>).

**$^{13}\text{C}$  NMR** (126 MHz, Acetone- $d_6$ )  $\delta$ (ppm): 158.9 ( $\underline{\text{C}}=\text{O}$ ), 127.7 ( $\text{C}=\underline{\text{C}}\text{CH}_3$ ), 126.7 ( $\underline{\text{C}}=\text{CCH}_3$ ), 100.0 ( $\underline{\text{C}}(\text{OCH}_3)_2$ ), 81.2 ( $\text{OC}(\underline{\text{C}}\text{H}_3)_3$ ), 54.1 ( $\underline{\text{C}}\text{H}_2\text{N}$ ), 47.7 ( $\text{C}(\text{O}\underline{\text{C}}\text{H}_3)_2$ ), 41.2 ( $\text{C}\underline{\text{C}}\text{H}_2\text{C}(\text{OCH}_3)_2$ ), 29.5 ( $\text{CH}_2\underline{\text{C}}\text{H}_2\text{C}(\text{OCH}_3)_3$ ), 28.41 ( $\text{OC}(\underline{\text{C}}\text{H}_3)_3$ ), 26.3 ( $\underline{\text{C}}\text{H}_2\text{CH}_2\text{C}(\text{OCH}_3)_3$  or  $\text{SiC}(\underline{\text{C}}\text{H}_3)_3$ ), 26.3 ( $\underline{\text{C}}\text{H}_2\text{CH}_2\text{C}(\text{OCH}_3)_3$  or  $\text{SiC}(\underline{\text{C}}\text{H}_3)_3$ ), 19.1 ( $\text{C}=\underline{\text{C}}\text{H}_3$ ), 18.3 ( $\text{Si}\underline{\text{C}}(\text{CH}_3)_3$ ), -4.7 ( $\text{Si}(\underline{\text{C}}\text{H}_3)_2$ ).

**IR** (film)  $\nu_{\text{max}}/\text{cm}^{-1}$ : 2953, 2931, 2896, 2858, 2828 (C-H), 1702 (C=O), 1391 (N-O), 1056 (C-O).

**HRMS** (ES+) exact mass calculated for  $[\text{M}+\text{Na}]^+$  ( $\text{C}_{21}\text{H}_{41}\text{NNaO}_5\text{Si}$ ) $^+$  requires  $m/z$  438.2646, found  $m/z$  438.2643.

### 1-((4,4-dimethoxy-2-methylcyclohex-1-en-1-yl)methyl)-1H-indole (S13)

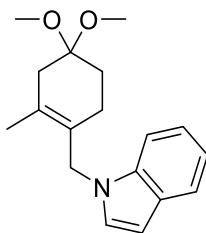

The title compound was prepared according to general procedure **A** from (4,4-dimethoxy-2-methylcyclohex-1-en-1-yl)methanol (**S2**) (400 mg, 2.15 mmol) with indole as a nucleophile and KHMDS (0.5 M in toluene) as the preferred base. The compound was purified by silica gel column chromatography (pentane/Et<sub>2</sub>O = 95/5 to 90/10 to 80/20) and obtained as a colourless oil in 21% yield (130 mg).

**<sup>1</sup>H NMR** (500 MHz, Acetone-*d*<sub>6</sub>) δ(ppm): 7.55 (dt, *J* = 8.0, 1.0 Hz, 1H, ArH), 7.39 (dq, *J* = 8.0, 1.0 Hz, 1H, ArH), 7.17 (d, *J* = 3.0 Hz, 1H, ArH), 7.13 (ddd, *J* = 8.5, 7.0, 1.0 Hz, 1H, ArH), 7.02 (ddd, *J* = 8.0, 7.0, 1.0 Hz, 1H, ArH), 6.43 (dd, *J* = 3.0, 1.0 Hz, 1H, ArH), 4.80 (s, 2H, CH<sub>2</sub>N), 3.12 (s, 6H, C(OCH<sub>3</sub>)<sub>2</sub>), 2.28 (s, 2H, CH<sub>2</sub>CCH<sub>3</sub>), 1.88 (s, 3H, CCH<sub>3</sub>), 1.83 – 1.77 (m, 2H, CH<sub>2</sub>CH<sub>2</sub>C(OCH<sub>3</sub>)<sub>2</sub>), 1.68 – 1.63 (m, 2H, CH<sub>2</sub>CH<sub>2</sub>C(OCH<sub>3</sub>)<sub>2</sub>).

**<sup>13</sup>C NMR** (126 MHz, Acetone-*d*<sub>6</sub>) δ(ppm): 137.5 (ArC), 129.8 (ArC), 128.7 (CCH<sub>3</sub>), 128.6 (ArCH), 126.6 (C=CCH<sub>3</sub>), 121.9 (ArCH), 121.3 (ArCH), 119.8 (ArCH), 110.5 (ArCH), 101.5 (ArCH), 100.0 (C(OCH<sub>3</sub>)<sub>3</sub>), 47.8 (C(OCH<sub>3</sub>)<sub>3</sub>), 47.7 (CH<sub>2</sub>N), 41.2 (CH<sub>2</sub>CCH<sub>3</sub>), 29.4 (CH<sub>2</sub>CH<sub>2</sub>C(OCH<sub>3</sub>)<sub>3</sub>), 26.2 (CH<sub>2</sub>CH<sub>2</sub>C(OCH<sub>3</sub>)<sub>3</sub>), 19.1 (CCH<sub>3</sub>).

**IR** (film)  $\nu_{\max}/\text{cm}^{-1}$ : 2938, 2828 (C-H), 1612, 1511, 1461 (C=C), 1127 (C-O).

**HRMS** (ES<sup>+</sup>) exact mass calculated for [M+H]<sup>+</sup> (C<sub>18</sub>H<sub>24</sub>NO<sub>2</sub>)<sup>+</sup> requires *m/z* 286.1802, found *m/z* 286.1804.

**tert-butyl ((4,4-dimethoxy-2-methylcyclohex-1-en-1-yl)methyl)(furan-2-yl)carbamate (S14)**

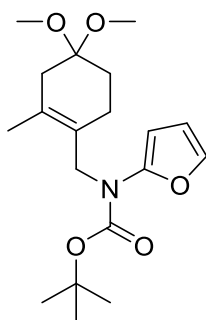

The title compound was prepared according to general procedure A from (4,4-dimethoxy-2-methylcyclohex-1-en-1-yl)methanol (**S2**) (300 mg, 1.61 mmol) with tert-butyl furan-2-ylcarbamate as a nucleophile and KHMDS (0.5 M in toluene) as the preferred base. The compound was purified by silica gel column chromatography (pentane/Et<sub>2</sub>O = 90/10 to 80/20) and obtained as a colourless oil in 62% yield (348 mg).

**<sup>1</sup>H NMR** (400 MHz, Benzene-*d*<sub>6</sub>) δ(ppm): 6.90 (dd, *J* = 2.0, 1.0 Hz, 1H, NCCHCHCHO), 6.06 (dd, *J* = 3.0, 2.0 Hz, 1H, NCCHCHCHO), 5.96 (s, 1H, NCCHCHCHO), 4.30 (s, 2H, CH<sub>2</sub>N), 3.03 (s, 6H, C(OCH<sub>3</sub>)<sub>2</sub>), 2.26 – 2.14 (m, 2H, CH<sub>2</sub>CH<sub>2</sub>C(OCH<sub>3</sub>)<sub>3</sub>), 2.08 (s, 2H, CCH<sub>2</sub>C(OCH<sub>3</sub>)<sub>2</sub>), 1.77 (t, *J* = 6.5, 2H, CH<sub>2</sub>CH<sub>2</sub>C(OCH<sub>3</sub>)<sub>3</sub>), 1.39 (s, 9H, C(CH<sub>3</sub>)<sub>3</sub>), 1.35 (s, 3H, CH<sub>3</sub>C=C).

**<sup>13</sup>C NMR** (101 MHz, Benzene-*d*<sub>6</sub>) δ(ppm): 154.5 (NC(=O)), 148.9 (NCCHCHCHO), 138.5 (NCCHCHCHO), 126.2 (CH<sub>3</sub>C=C (the other is beneath the solvent peak)), 111.1 (NCCHCHCHO), 102.5 (NCCHCHCHO), 100.0 (C(OCH<sub>3</sub>)<sub>2</sub>), 80.4 (OC(CH<sub>3</sub>)<sub>3</sub>), 49.3 (CH<sub>2</sub>N), 47.5 (OC(CH<sub>3</sub>)<sub>3</sub>), 40.9 (CCH<sub>2</sub>C(OCH<sub>3</sub>)<sub>2</sub>), 29.3 (CH<sub>2</sub>CH<sub>2</sub>C(OCH<sub>3</sub>)<sub>2</sub>), 28.2 (C(CH<sub>3</sub>)<sub>3</sub>), 26.2 (CH<sub>2</sub>CH<sub>2</sub>C(OCH<sub>3</sub>)<sub>2</sub>), 18.6 (CH<sub>3</sub>C=C).

**IR** (film)  $\nu_{\text{max}}$ /cm<sup>-1</sup> 2980 (C-H), 1711 (C=O), 1366, 1150 (C-O ester), 1055 (C-O acetal).

**HRMS** (ES<sup>+</sup>) exact mass calculated for [M+Na]<sup>+</sup> (C<sub>19</sub>H<sub>29</sub>NNaO<sub>5</sub>)<sup>+</sup> requires *m/z* 374.1938, found *m/z* 374.1934.



**benzyl ((4,4-dimethoxy-2-methylcyclohex-1-en-1-yl)methyl)(furan-2-yl)carbamate (S15)**

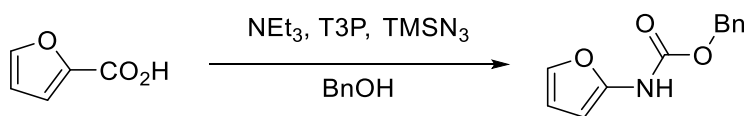

i. To a solution of furan-2-carboxylic acid (2.00 g, 17.8 mmol, 1.00 eq) in toluene (45 mL) was added NEt<sub>3</sub> (3.73 mL, 26.8 mmol, 1.50 eq) followed by T3P (50% in EtOAc, 12.8 mL, 21.4 mmol, 1.20 eq), azidotrimethylsilane (2.84 mL, 21.4 mmol, 1.20 eq) and benzyl alcohol (3.69 mL, 35.7 mmol, 2.00 eq) sequentially. The reaction was refluxed at 120 °C for 16 h at which point it was quenched with dilute aq. K<sub>2</sub>CO<sub>3</sub> (200 mL) and extracted with EtOAc (3 x 200 mL). The combined organic layers were dried over Na<sub>2</sub>SO<sub>4</sub>, filtered and concentrated *in vacuo*. The crude product was purified by silica gel column chromatography (pentane/Et<sub>2</sub>O = 19/1) to provide benzyl furan-2-ylcarbamate in 64% yield (2.48 g) as a yellow solid.

<sup>1</sup>H NMR (400 MHz, CDCl<sub>3</sub>) δ(ppm): 7.33-7.44 (m, 5H, PhCH), 7.09 (s, 1H, OCHCHCHCN), 6.92 (s, 1H, NH), 6.37 (dd, J = 3.0, 2.0 Hz, 1H, OCHCHCHCN), 6.11 (d, J = 15.0 Hz, 1H, OCHCHCHCN), 5.22 (s, 2H, CH<sub>2</sub>).

<sup>13</sup>C NMR (101 MHz, CDCl<sub>3</sub>) δ(ppm): 144.9 (C=O), 136.7 (OCHCHCHCN), 135.9 (OCHCHCHCN), 128.7 (PhC), 111.6 (OCHCHCHCN), 108.1 (OCHCHCHCN), 67.80 (CH<sub>2</sub>).

LRMS (ES<sup>+</sup>) exact mass calculated for [M+Na]<sup>+</sup> (C<sub>12</sub>H<sub>11</sub>NNaO<sub>3</sub>)<sup>+</sup> requires *m/z* 240, found *m/z* 240.

MP: 42-45 °C.

Data is consistent with that published in the literature.<sup>3</sup>

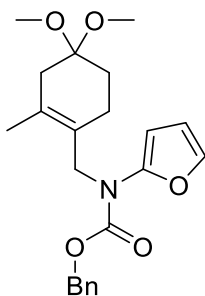

ii. The title compound was prepared according to general procedure A from (4,4-dimethoxy-2-methylcyclohex-1-en-1-yl)methanol (S2) (219 mg, 1.18 mmol) with benzyl furan-2-ylcarbamate as a nucleophile and KHMDS (0.5 M in toluene) as the base. The compound was purified by silica gel

column chromatography (pentane/Et<sub>2</sub>O = 90/10) and obtained as a colourless oil in 37% yield (170 mg).

**<sup>1</sup>H NMR** (500 MHz, Acetone-*d*<sub>6</sub>) δ(ppm): 7.39 – 7.26 (m, 6H, ArCH and NCCHCHCHO), 6.38 (dd, *J* = 3.5, 2.0 Hz, 1H, NCCHCHCHO), 6.08 (dd, *J* = 3.5, 1.0 Hz, 1H, NCCHCHCHO), 5.16 (s, 2H, OCH<sub>2</sub>), 4.25 (s, 2H, CH<sub>2</sub>N), 3.12 (s, 6H, C(OCH<sub>3</sub>)<sub>2</sub>), 2.09 (s, 2H, CCH<sub>2</sub>C(OCH<sub>3</sub>)<sub>2</sub>), 2.04 – 1.98 (m, 2H, CH<sub>2</sub>CH<sub>2</sub>C(OCH<sub>3</sub>)<sub>2</sub>), 1.72 – 1.66 (m, 2H (CH<sub>2</sub>CH<sub>2</sub>C(OCH<sub>3</sub>)<sub>2</sub>)), 1.43 (s, 3H, CH<sub>3</sub>C=C).

**<sup>13</sup>C NMR** (126 MHz, Acetone-*d*<sub>6</sub>) δ(ppm): 155.9 (NC(=O)), 148.1 (NCCHCHCHO), 140.2 (NCCHCHCHO), 137.8 (ArC), 129.6 (CH<sub>3</sub>C=C), 129.2 (ArCH), 128.7 (ArCH), 128.3 (ArCH), 125.8 (CH<sub>3</sub>C=C), 111.8 (NCCHCHCHO), 104.3 (NCCHCHCHO), 100.0 (C(OCH<sub>3</sub>)<sub>2</sub>), 67.9 (OCH<sub>2</sub>), 50.2 (CH<sub>2</sub>N), 47.7 (C(OCH<sub>3</sub>)<sub>2</sub>), 41.2 (CCH<sub>2</sub>C(OCH<sub>3</sub>)<sub>2</sub>), 29.5 (CH<sub>2</sub>CH<sub>2</sub>C(OCH<sub>3</sub>)<sub>2</sub>), 26.5 (CH<sub>2</sub>CH<sub>2</sub>C(OCH<sub>3</sub>)<sub>2</sub>), 18.7 (CCH<sub>3</sub>).

**IR** (film)  $\nu_{\text{max}}/\text{cm}^{-1}$  2981 (C-H), 1718 (C=O), 1151 (C-O ester), 1054 (C-O acetal).

**HRMS** (ES<sup>+</sup>) exact mass calculated for [M+Na]<sup>+</sup> (C<sub>22</sub>H<sub>27</sub>NNaO<sub>5</sub>)<sup>+</sup> requires 408.1781, found 408.1777.

#### 4-((benzyloxy)methyl)-3-methylcyclohex-3-en-1-one (1a)

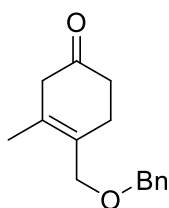

The title compound was prepared according to general procedure **B** from (((4,4-dimethoxy-2-methylcyclohex-1-en-1-yl)methoxy)methyl)benzene (**S3**) (575 mg, 2.08 mmol, 1.00 eq). Upon completion of the reaction as judged by TLC analysis (pentane/Et<sub>2</sub>O = 9/1) the reaction mixture was transferred directly to silica gel and purified by silica gel column chromatography (pentane/Et<sub>2</sub>O = 95/5) to afford the title compound as a yellow oil in 95% yield (457 mg).

**<sup>1</sup>H NMR** (500 MHz, CDCl<sub>3</sub>) δ(ppm): 7.44 – 7.27 (m, 5H, ArH), 4.50 (s, 2H, CH<sub>2</sub>Ph), 4.08 (s, 2H, CH<sub>2</sub>OCH<sub>2</sub>Ph), 2.84 (s, 2H, CCH<sub>2</sub>C(=O)), 2.60 – 2.52 (m, 2H, CH<sub>2</sub>CH<sub>2</sub>C(=O)), 2.51 – 2.44 (m, 2H, CH<sub>2</sub>CH<sub>2</sub>C(=O)), 1.72 (s, 3H, CH<sub>3</sub>).

**<sup>13</sup>C NMR** (126 MHz, CDCl<sub>3</sub>) δ(ppm): 210.6 (C=O), 138.4 (ArC), 129.6 (CH<sub>3</sub>C), 128.6 (ArCH), 128.4 (CH<sub>3</sub>C=C), 127.9 (ArCH), 127.9 (ArCH), 72.4 (CH<sub>2</sub>Ph), 69.1 (CH<sub>2</sub>OCH<sub>2</sub>Ph), 45.7 (CCH<sub>2</sub>C(=O)), 39.0 (CH<sub>2</sub>CH<sub>2</sub>C(=O)), 27.8 (CH<sub>2</sub>CH<sub>2</sub>C(=O)), 18.7 (CH<sub>3</sub>).

**IR** (film) ν<sub>max</sub>/cm<sup>-1</sup>: 1717 (C=O), 1262 (C-H), 1068.

**HRMS** (ES<sup>+</sup>) exact mass calculated for [M+H]<sup>+</sup> (C<sub>15</sub>H<sub>18</sub>NaO<sub>2</sub>)<sup>+</sup> requires *m/z* 253.1199, found *m/z* 253.1201.

#### 4-(methoxymethyl)-3-methylcyclohex-3-en-1-one (1b)

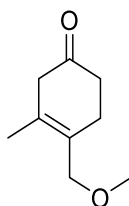

The title compound was prepared according to general procedure **B** from 4,4-dimethoxy-1-(methoxymethyl)-2-methylcyclohex-1-ene (**S4**) (135mg, 0.670 mmol, 1.00 eq). Upon reaction completion as judged by TLC analysis the reaction mixture was diluted with H<sub>2</sub>O (20 ml) and extracted with Et<sub>2</sub>O (3 x 10 ml). The combined organic layers were washed with H<sub>2</sub>O (10 ml), brine, dried over Na<sub>2</sub>SO<sub>4</sub> and concentrated *in vacuo*. The crude reaction mixture was purified by silica gel column chromatography (pentane/Et<sub>2</sub>O = 1/1) to obtain the title compound as a colourless oil in 71% yield (73.0 mg).

**<sup>1</sup>H NMR** (500 MHz, Benzene-*d*<sub>6</sub>) δ(ppm): 3.65 (s, 2H, CH<sub>2</sub>O), 3.01 (s, 3H, CH<sub>3</sub>O), 2.46 (s, 2H, CCH<sub>2</sub>C(=O)), 2.23 – 2.17 (m, 2H, CH<sub>2</sub>CH<sub>2</sub>C(=O)), 2.17 – 2.11 (m, 2H, CH<sub>2</sub>CH<sub>2</sub>C(=O)), 1.29 (s, 3H, CH<sub>3</sub>C).

**<sup>13</sup>C NMR** (126 MHz, Benzene-*d*<sub>6</sub>) δ(ppm): 207.7 (C=O), 128.9 (one of C=C), 128.6 (one of C=C), 71.2 (CH<sub>2</sub>O), 57.4 (CH<sub>3</sub>O), 45.5 (CCH<sub>2</sub>C(=O)), 38.8 (CH<sub>2</sub>CH<sub>2</sub>C(=O)), 27.6 (CH<sub>2</sub>CH<sub>2</sub>C(=O)), 18.2 (CCH<sub>3</sub>).

**IR** (film)  $\nu_{\text{max}}/\text{cm}^{-1}$ : 2980, 2891, 2818 (C-H), 1717 (C=O), 1083 (C-O).

**HRMS** (ES+) exact mass calculated for [M+H]<sup>+</sup> (C<sub>9</sub>H<sub>15</sub>O<sub>2</sub>)<sup>+</sup> requires  $m/z$  155.1066, found  $m/z$  155.1067.

#### 4-((allyloxy)methyl)-3-methylcyclohex-3-en-1-one (1c)

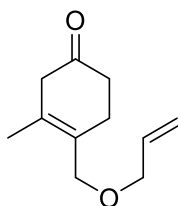

The title compound was prepared according to general procedure **B** from 1-((allyloxy)methyl)-4,4-dimethoxy-2-methylcyclohex-1-ene (**S5**) (37 mg, 0.163 mmol, 1.00 eq). Upon completion of the reaction as judged by TLC analysis the reaction mixture was transferred directly to silica gel and purified by silica gel column chromatography (pentane/Et<sub>2</sub>O = 9/1) to afford the title compound as a colourless oil in 99% yield (25.0 mg).

**<sup>1</sup>H NMR** (400 MHz, Acetone-*d*<sub>6</sub>) δ(ppm): 5.92 (ddt, *J* = 17.5, 10.5, 5.5 Hz, 1H, CH=CH<sub>2</sub>), 5.26 (dq, *J* = 17.5, 2.0 Hz, 1H, one of CH=CH<sub>A</sub>H<sub>B</sub>), 5.12 (ddt, *J* = 10.5, 2.0, 1.5 Hz, 1H, one of CH=CH<sub>A</sub>H<sub>B</sub>), 4.05 (s, 2H, CH<sub>3</sub>C=CCH<sub>2</sub>O), 3.94 (dt, *J* = 5.5, 1.5 Hz, 2H, CH<sub>2</sub>CH=CH<sub>2</sub>), 2.80 (s, 2H, CCH<sub>2</sub>C(=O)), 2.52 – 2.45 (m, 2H, CH<sub>2</sub>CH<sub>2</sub>C(=O)), 2.42 – 2.36 (m, 2H, CH<sub>2</sub>CH<sub>2</sub>C(=O)), 1.73 (s, 3H, CH<sub>3</sub>).

**<sup>13</sup>C NMR** (101 MHz, Acetone-*d*<sub>6</sub>) δ(ppm): 209.5 (C=O), 136.5 (CH=CH<sub>2</sub>), 129.8 (CH<sub>3</sub>C=C), 129.2 (CH<sub>3</sub>C=C), 116.4 (CH=CH<sub>2</sub>), 71.1 (CH<sub>2</sub>CH=CH<sub>2</sub>), 69.3 (CH<sub>3</sub>C=CCH<sub>2</sub>O), 46.0 (CCH<sub>2</sub>C(=O)), 39.2 (CH<sub>2</sub>CH<sub>2</sub>C(=O)), 28.2 (CH<sub>2</sub>CH<sub>2</sub>C(=O)), 18.5 (CH<sub>3</sub>).

**IR** (film)  $\nu_{\text{max}}/\text{cm}^{-1}$ : 1717 (C=O), 1671 (C=C), 1072 (C-O).

**HRMS** (ES<sup>+</sup>) exact mass calculated for [M+H]<sup>+</sup> (C<sub>11</sub>H<sub>17</sub>O<sub>2</sub>)<sup>+</sup> requires *m/z* 181.1223, found *m/z* 181.1224.

**3-methyl-4-(((3-methylbut-2-en-1-yl)oxy)methyl)cyclohex-3-en-1-one (1d)**

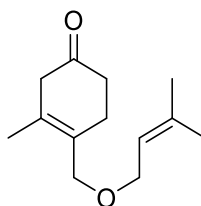

The title compound was prepared according to general procedure **B** from 4,4 dimethoxy-2-methyl-1-(((3-methylbut-2-en-1-yl)oxy)methyl)cyclohex-1-ene (**S6**) (443 mg, 1.74 mmol). The crude product was purified by silica gel column chromatography (pentane/ Et<sub>2</sub>O = 85/15) to afford the title compound as a colourless oil in 91% yield (331 mg).

**<sup>1</sup>H NMR** (500 MHz, Acetone-*d*<sub>6</sub>) δ(ppm): 5.32 (tdt, *J* = 6.5, 3.0, 1.5 Hz, 1H, CHCH<sub>2</sub>O), 4.01 (s, 2H, CH<sub>2</sub>OCH<sub>2</sub>CH), 3.93 (d, *J* = 6.5 Hz, 2H, OCH<sub>2</sub>CH), 2.79 (s, 2H, CCH<sub>2</sub>C(=O)) 2.52 – 2.44 (m, 2H, CH<sub>2</sub>CH<sub>2</sub>C(=O)), 2.41 – 2.36 (m, 2H, CH<sub>2</sub>CH<sub>2</sub>C(=O)), 1.73 (s, 3H, CH<sub>3</sub>CCH<sub>2</sub>C(=O)), 1.72 (d, *J* = 1.0 Hz, 3H, one of C=C(CH<sub>3</sub>)<sub>A</sub>(CH<sub>3</sub>)<sub>B</sub>), 1.65 (s, 3H, one of C=C(CH<sub>3</sub>)<sub>A</sub>(CH<sub>3</sub>)<sub>B</sub>).

**<sup>13</sup>C NMR** (126 MHz, Acetone-*d*<sub>6</sub>) δ(ppm): 209.3 (C=O), 136.3 (C(CH<sub>3</sub>)<sub>2</sub>), 129.5 (one of (CH<sub>3</sub>)(CH<sub>2</sub>)C=C(CH<sub>2</sub>)(CH<sub>2</sub>)), 129.5 ((CH<sub>3</sub>)(CH<sub>2</sub>)C=C(CH<sub>2</sub>)(CH<sub>2</sub>)), 122.9 (CH<sub>2</sub>CH=C), 69.0 (CH<sub>2</sub>OCH<sub>2</sub>CH), 66.8 (CH<sub>2</sub>OCH<sub>2</sub>CH), 46.0 (CCH<sub>2</sub>C(=O)), 39.2 (CH<sub>2</sub>CH<sub>2</sub>C(=O)), 28.3 (CH<sub>2</sub>CH<sub>2</sub>C(=O)), 25.8 (one of C(CH<sub>3</sub>)<sub>A</sub>(CH<sub>3</sub>)<sub>B</sub>), 18.5 (CH<sub>3</sub>CCH<sub>2</sub>C(=O)), 18.0 (one of C(CH<sub>3</sub>)<sub>A</sub>(CH<sub>3</sub>)<sub>B</sub>).

**IR** (film) ν<sub>max</sub>/cm<sup>-1</sup>: 2970, 2914, 2857 (C-H), 1718 (C=O), 1676 (C=C), 1061 (C-O).

**HRMS** (ES<sup>+</sup>) exact mass calculated for [M+Na]<sup>+</sup> (C<sub>13</sub>H<sub>20</sub>NaO<sub>2</sub>)<sup>+</sup> requires *m/z* 231.1356, found *m/z* 231.1358.

**3-methyl-4-((prop-2-yn-1-yloxy)methyl)cyclohex-3-en-1-one (1e)**

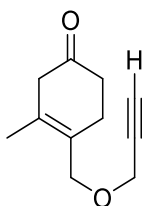

The title compound was prepared according to general procedure **B** from 4,4-dimethoxy-2-methyl-1-((prop-2-yn-1-yloxy)methyl)cyclohex-1-ene (**S7**) (168 mg, 0.75 mmol, 1.00 eq). Upon completion of the reaction as judged by TLC analysis the reaction mixture was transferred directly to silica gel and purified by silica gel column chromatography (pentane/Et<sub>2</sub>O = 7/3) to afford the title compound as a colourless oil in 77% yield (103 mg).

**<sup>1</sup>H NMR** (500 MHz, Benzene-*d*<sub>6</sub>) δ(ppm): 3.82 (s, 2H, CH<sub>2</sub>CCH<sub>2</sub>), 3.77 (d, *J* = 2.5 Hz, 2H, CH<sub>2</sub>C≡CH), 2.43 (s, 2H, CH<sub>2</sub>CCH<sub>3</sub>), 2.18 – 2.06 (m, 4H, CH<sub>2</sub>CH<sub>2</sub>C(=O)), 2.02 (t, *J* = 2.5 Hz, 1H, C≡CH), 1.32 (s, 3H, CH<sub>3</sub>).

**<sup>13</sup>C NMR** (126 MHz, Benzene-*d*<sub>6</sub>) δ(ppm): 207.4 (C=O), 130.1 (CCH<sub>3</sub>), 127.7 (C=CCH<sub>3</sub>), 80.5 (C≡CH), 74.4 (C≡CH), 68.2 (CH<sub>2</sub>C=CCH<sub>3</sub>), 56.8 (CH<sub>2</sub>C≡CH), 45.5 (CH<sub>2</sub>CCH<sub>3</sub>), 38.7 (CH<sub>2</sub>CH<sub>2</sub>C(=O)), 27.6 (CH<sub>2</sub>CH<sub>2</sub>C(=O)), 18.3 (CH<sub>3</sub>).

**IR** (film)  $\nu_{\text{max}}/\text{cm}^{-1}$ : 3263 (C≡C-H), 2911, 2852 (C-H), 2113 (C≡C), 1715 (C=O).

**HRMS** (APCI+) exact mass calculated for [M+H]<sup>+</sup> (C<sub>11</sub>H<sub>15</sub>O<sub>2</sub>)<sup>+</sup> requires *m/z* 179.1067, found *m/z* 179.1070.

#### 4-(((tert-butyldimethylsilyl)oxy)methyl)-3-methylcyclohex-3-en-1-one (1f)

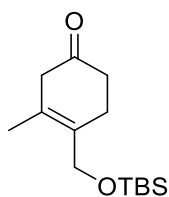

The title compound was prepared according to general procedure **B** from tert-butyl((4,4-dimethoxy-2-methylcyclohex-1-en-1-yl)methoxy)dimethylsilane (**S8**) (2.30 g, 7.65 mmol). The crude product was purified by silica gel column chromatography (pentane/Et<sub>2</sub>O = 9/1) to afford the title compound as a colourless oil in 84% yield (1.63 g).

**<sup>1</sup>H NMR** (500 MHz, Acetone-*d*<sub>6</sub>) δ(ppm): 4.28 (s, 2H, CH<sub>2</sub>O), 2.78 (s, 2H, CH<sub>3</sub>CCH<sub>2</sub>C(=O)), 2.55 – 2.48 (m, 2H, CH<sub>2</sub>CH<sub>2</sub>C(=O)), 2.42 – 2.36 (m, 2H, CH<sub>2</sub>CH<sub>2</sub>C(=O)), 1.72 (s, 3H, C=CCH<sub>3</sub>), 0.91 (s, 9H, C(CH<sub>3</sub>)<sub>3</sub>), 0.09 (s, 6H, Si(CH<sub>3</sub>)<sub>2</sub>).

**<sup>13</sup>C NMR** (126 MHz, Acetone-*d*<sub>6</sub>) δ(ppm): 209.4 (C=O), 131.4 (C=CCH<sub>3</sub>), 127.1 (C=CCH<sub>3</sub>), 62.7 (CH<sub>2</sub>O), 46.0 (CH<sub>3</sub>CCH<sub>2</sub>C(=O)), 39.2 (CH<sub>2</sub>CH<sub>2</sub>C(=O)), 27.6 (CH<sub>2</sub>CH<sub>2</sub>C(=O)), 26.3 (C(CH<sub>3</sub>)<sub>3</sub>), 18.8 (C(CH<sub>3</sub>)<sub>3</sub>), 18.4 (C=CCCH<sub>3</sub>), -5.1 (Si(CH<sub>3</sub>)<sub>2</sub>).

**IR** (film) ν<sub>max</sub>/cm<sup>-1</sup>: 2956, 2929, 2887, 2856 (C-H), 1721 (C=O), 1063 (C-O).

**HRMS** (APCI+) exact mass calculated for [M+H]<sup>+</sup> (C<sub>14</sub>H<sub>27</sub>O<sub>2</sub>Si)<sup>+</sup> requires *m/z* 255.1775, found *m/z* 255.1778.



#### 4-(hydroxymethyl)-3-methylcyclohex-3-en-1-one (1g)

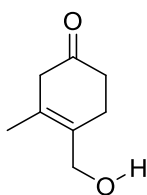

The title compound was prepared according to general procedure **B** from (4,4-dimethoxy-2-methylcyclohex-1-en-1-yl)methanol (**S2**) (100 mg, 0.536 mmol, 1.00 eq) using catalyst **C1** (11.0 mg, 0.0286 mmol, 0.05 eq). Upon completion of the reaction as judged by TLC analysis (Et<sub>2</sub>O) the reaction mixture was transferred directly to silica gel and purified by silica gel column chromatography (Et<sub>2</sub>O) to afford the title compound as a yellow oil in 83% yield (63 mg).

**<sup>1</sup>H NMR** (400 MHz, CDCl<sub>3</sub>) δ(ppm): 4.22 (s, 2H, CH<sub>2</sub>OH), 2.83 (s, 2H, CCH<sub>2</sub>C(=O)), 2.57 (m, 2H, CH<sub>2</sub>CH<sub>2</sub>C(=O)), 2.51 – 2.46 (m, 2H, CH<sub>2</sub>CH<sub>2</sub>C(=O)), 1.75 (s, 3H, CH<sub>3</sub>), 1.46 (s, 1H, OH).

**<sup>13</sup>C NMR** (101 MHz, CDCl<sub>3</sub>) δ(ppm): 210.6 (C=O), 130.5 (CH<sub>3</sub>C=C), 128.5 (CH<sub>3</sub>C=C), 62.0 (CH<sub>2</sub>OH), 45.7 (CCH<sub>2</sub>C(=O)), 39.0 (CH<sub>2</sub>CH<sub>2</sub>C(=O)), 27.5 (CH<sub>2</sub>CH<sub>2</sub>C(=O)), 18.5 (CH<sub>3</sub>).

**IR** (film)  $\nu_{\text{max}}/\text{cm}^{-1}$ : 3391 (O-H), 2919, 2857 (C-H), 1709 (C=O), 995 (C-O).

**HRMS** (ES<sup>+</sup>) exact mass calculated for [M+H]<sup>+</sup> (C<sub>8</sub>H<sub>13</sub>O<sub>2</sub>)<sup>+</sup> requires  $m/z$  141.0910, found  $m/z$  141.0911.

**tert-butyl ((2-methyl-4-oxocyclohex-1-en-1-yl)methyl)(phenyl)carbamate (1i)**

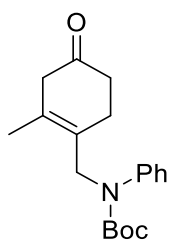

The title compound was prepared according to general procedure **C** from tert-butyl ((4,4-dimethoxy-2-methylcyclohex-1-en-1-yl)methyl)(phenyl)carbamate (**S9**) (330 mg, 0.913 mmol). The crude product was purified by silica gel column chromatography (pentane/Et<sub>2</sub>O = 7/3) to afford the title compound as a white solid in 89% yield (256 mg).

**<sup>1</sup>H NMR** (600 MHz, Acetone-*d*<sub>6</sub>) δ(ppm): 7.37 – 7.28 (m, 2H, ArH), 7.28 – 7.22 (m, 2H, ArH), 7.22 – 7.10 (m, 1H, ArH), 4.45 (s, 2H, CH<sub>2</sub>N), 2.65 (s, 2H, CCH<sub>2</sub>C(=O)), 2.46 – 2.39 (m, 2H, CH<sub>2</sub>CH<sub>2</sub>C(=O)), 2.29 (t, *J* = 7.0 Hz, 2H, CH<sub>2</sub>CH<sub>2</sub>C(=O)), 1.48 (s, 3H, C=CCH<sub>3</sub>), 1.40 (s, 9H, C(CH<sub>3</sub>)<sub>3</sub>).

**<sup>13</sup>C NMR** (151 MHz, Acetone-*d*<sub>6</sub>) δ(ppm): 209.1 (CH<sub>2</sub>C(=O)), 155.4 (NC(=O)), 143.2 (ArC), 129.6 (C=CCH<sub>3</sub>), 129.3 (ArCH), 128.5 (C=CCH<sub>3</sub>), 128.3 (ArCH), 126.8 (ArCH), 80.2 (OC(CH<sub>3</sub>)<sub>3</sub>), 50.3 (CH<sub>2</sub>N), 46.0 (CCH<sub>2</sub>C(=O)), 39.1 (CH<sub>2</sub>CH<sub>2</sub>C(=O)), 28.5 (C(CH<sub>3</sub>)<sub>3</sub>), 28.0 (CH<sub>2</sub>CH<sub>2</sub>C(=O)), 18.4 (C=CCH<sub>3</sub>).

**IR** (powder) *v*<sub>max</sub>/cm<sup>-1</sup>: 2979, 3048 (C-H), 1717 (ketone C=O), 1687 (boc C=O), 754, 702 (C-H).

**HRMS** (ES+) exact mass calculated for [M+H]<sup>+</sup> (C<sub>19</sub>H<sub>26</sub>NO<sub>3</sub>)<sup>+</sup> requires *m/z* 316.1907, found *m/z* 316.1908.

**MP**: 52-54 °C.

**tert-butyl ((2-methyl-4-oxocyclohex-1-en-1-yl)methyl)(prop-2-yn-1-yl)carbamate (1j)**

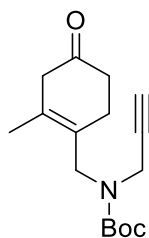

The title compound was prepared according to general procedure **C** from tert-butyl ((4,4-dimethoxy-2-methylcyclohex-1-en-1-yl)methyl)(prop-2-yn-1-yl)carbamate (**S10**) (255 mg, 0.788 mmol). The crude product was purified by silica gel column chromatography (pentane/Et<sub>2</sub>O = 8/2) to afford the title compound as a white solid in 85% yield (185 mg).

**<sup>1</sup>H NMR** (600 MHz, Acetone-*d*<sub>6</sub>) δ(ppm): 4.12 (s, 2H, C=CCH<sub>2</sub>N), 3.97 (bs, 2H, CH<sub>2</sub>C≡CH), 2.81 (s, 2H, CCH<sub>2</sub>C(=O) (beneath water peak)), 2.71 (t, *J* = 2.5 Hz, 1H, C≡CH), 2.42 – 2.35 (m, 4H, CH<sub>2</sub>CH<sub>2</sub>C(=O) and CH<sub>2</sub>CH<sub>2</sub>C(=O)), 1.81 (m, 3H, C=CCH<sub>3</sub>), 1.47 (s, 9H, C(CH<sub>3</sub>)<sub>3</sub>).

**<sup>13</sup>C NMR** (151 MHz, Acetone-*d*<sub>6</sub>) δ(ppm): 209.1 (CH<sub>2</sub>C(=O)), 155.7 (NC(=O)), 130.4 (C=CCH<sub>3</sub>), 127.7 (C=CCH<sub>3</sub>), 80.9 (OC(CH<sub>3</sub>)<sub>3</sub>), 80.4 (C≡CH), 72.6 (C≡CH), 46.5 (C=CCH<sub>2</sub>N), 46.1 (CCH<sub>2</sub>C(=O)), 39.1 (CH<sub>2</sub>CH<sub>2</sub>C(=O)), 35.3 (CH<sub>2</sub>C≡CH), 28.5 (C(CH<sub>3</sub>)<sub>3</sub>), 27.6 (CH<sub>2</sub>CH<sub>2</sub>C(=O)), 18.6 (C=CCH<sub>3</sub>).

**IR** (film)  $\nu_{\text{max}}$ /cm<sup>-1</sup>: 3235 (C≡C-H), 2929, 2855 (C-H), 2362 (C≡C), 1689 (C=O).

**HRMS** (ES<sup>+</sup>) exact mass calculated for [M+Na]<sup>+</sup> (C<sub>16</sub>H<sub>23</sub>NNaO<sub>3</sub>)<sup>+</sup> requires *m/z* 300.1570, found *m/z* 300.1571.

**MP**: 46-48 °C.

**tert-butyl (1,3-dioxoisindolin-2-yl)((2-methyl-4-oxocyclohex-1-en-1-yl)methyl)carbamate (1k)**

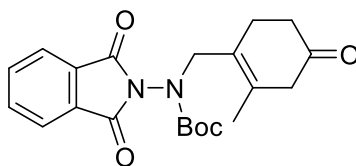

The title compound was prepared according to general procedure **C** from tert-butyl ((4,4-dimethoxy-2-methylcyclohex-1-en-1-yl)methyl)(1,3-dioxoisindolin-2-yl)carbamate (**S11**) (255 mg, 0.788 mmol). The crude product was purified by silica gel column chromatography (pentane/EtOAc = 6/4) to afford the title compound as a white solid (foam) in 44% yield over two steps (363 mg).

**<sup>1</sup>H NMR** (400 MHz, Methanol-*d*<sub>4</sub>) δ(ppm): 8.06 – 7.84 (m, 4H, ArH), 4.40 (s, 2H, CH<sub>2</sub>N), 2.71 (s, 2H, CCH<sub>2</sub>C(=O)), 2.68 – 2.58 (m, 2H, CH<sub>2</sub>CH<sub>2</sub>C(=O)), 2.52 – 2.43 (m, 2H, CH<sub>2</sub>CH<sub>2</sub>C(=O)), 1.55 (s, 3H, C=CCH<sub>3</sub>), 1.53 (s, 3H, C(CH<sub>3</sub>)<sub>3</sub> (minor rotamer)), 1.33 (s, 6H, C(CH<sub>3</sub>)<sub>3</sub> (major rotamer)).

**<sup>13</sup>C NMR** (101 MHz, Methanol-*d*<sub>4</sub>) δ(ppm): 212.8 (CH<sub>2</sub>C(=O)), 166.7 (ArC(=O)), 155.3 (OC(=O)), 136.5 (ArCH, major rotamer), 136.4 (ArCH, minor rotamer), 132.7 (ArC), 130.9 (C=CCH<sub>3</sub>), 126.9 (C=CCH<sub>3</sub>), 124.9 (ArCH), 84.6 (OC(CH<sub>3</sub>)<sub>3</sub>, minor rotamer), 83.6 (OC(CH<sub>3</sub>)<sub>3</sub>, major rotamer), 51.0 (CH<sub>2</sub>N, minor rotamer), 49.1 (CH<sub>2</sub>N, major rotamer), 46.1 (CCH<sub>2</sub>C(=O)), 39.5 (CH<sub>2</sub>CH<sub>2</sub>C(=O)), 28.7 (CH<sub>2</sub>CH<sub>2</sub>C(=O)), 28.4 (C(CH<sub>3</sub>)<sub>3</sub> minor rotamer), 28.1 (C(CH<sub>3</sub>)<sub>3</sub> major rotamer), 18.3 (C=CCH<sub>3</sub>).

**HRMS** (ES+) exact mass calculated for [M+Na]<sup>+</sup> (C<sub>21</sub>H<sub>24</sub>N<sub>2</sub>NaO<sub>5</sub>) requires *m/z* 407.1577, found *m/z* 407.1573.

**IR** (powder) *v*<sub>max</sub>/cm<sup>-1</sup>: 2981, 2889 (C-H), 1732, 1704 (C=O), 1425 (C-O), 1149 (C-N).

**MP**: 106-109 °C.

**tert-butyl ((tert-butyldimethylsilyl)oxy)((2-methyl-4-oxocyclohex-1-en-1-yl)methyl)carbamate (11)**

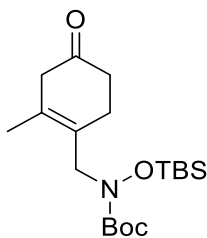

The title compound was prepared according to general procedure **B** from tert-butyl ((tert-butyldimethylsilyl)oxy)((4,4-dimethoxy-2-methylcyclohex-1-en-1-yl)methyl)carbamate (**S12**) (331 mg, 0.796 mmol). The crude product was purified by silica gel column chromatography (pentane/Et<sub>2</sub>O = 9/1) to afford the title compound as a colourless oil in 60% yield (176 mg).

**<sup>1</sup>H NMR** (400 MHz, Acetone-*d*<sub>6</sub>) δ(ppm): 4.23 (s, 2H, CH<sub>2</sub>N), 2.79 (s, 2H, CCH<sub>2</sub>C(=O)), 2.49 – 2.43 (m, 2H, CH<sub>2</sub>CH<sub>2</sub>C(=O)), 2.43 – 2.35 (m, 2H, CH<sub>2</sub>CH<sub>2</sub>C(=O)), 1.76 (s, 3H, C=CCH<sub>3</sub>), 1.48 (s, 9H, OC(CH<sub>3</sub>)<sub>3</sub>), 0.93 (s, 9H, SiC(CH<sub>3</sub>)<sub>3</sub>), 0.17 (s, 6H, Si(CH<sub>3</sub>)<sub>2</sub>).

**<sup>13</sup>C NMR** (126 MHz, Acetone-*d*<sub>6</sub>) δ(ppm): 209.1 (CH<sub>2</sub>C(=O)), 158.9 (NC(=O)), 129.6 (C=CCH<sub>3</sub>), 128.1 (C=CCH<sub>3</sub>), 81.5 (OC(CH<sub>3</sub>)<sub>3</sub>), 53.8 (CH<sub>2</sub>N), 46.1 (CCH<sub>2</sub>C(=O)), 39.0 (CH<sub>2</sub>CH<sub>2</sub>C(=O)), 28.4 (OC(CH<sub>3</sub>)<sub>3</sub>), 28.3 (CH<sub>2</sub>CH<sub>2</sub>C(=O)), 26.2 (SiC(CH<sub>3</sub>)<sub>3</sub>), 18.9 (C=CCH<sub>3</sub>), 18.3 (SiC(CH<sub>3</sub>)<sub>3</sub>), -4.7 (Si(CH<sub>3</sub>)<sub>2</sub>).

**IR** (film) ν<sub>max</sub>/cm<sup>-1</sup>: 2957, 2931, 2852 (C-H), 1721 (ketone C=O), 1700 (boc C=O).

**HRMS** (ES<sup>+</sup>) exact mass calculated for [M+Na]<sup>+</sup> (C<sub>19</sub>H<sub>35</sub>NNaO<sub>4</sub>Si)<sup>+</sup> requires *m/z* 392.2228, found *m/z* 392.2226.

#### 4-((1H-indol-1-yl)methyl)-3-methylcyclohex-3-en-1-one (1m)

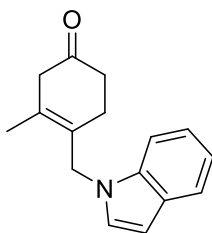

The title compound was prepared according to general procedure **C** from 1-((4,4-dimethoxy-2-methylcyclohex-1-en-1-yl)methyl)-1H-indole (**S13**) (113 mg, 0.397 mmol). The crude product was purified by silica gel column chromatography (pentane/Et<sub>2</sub>O = 8/2) to afford the title compound as a white solid in 95% yield (85.0 mg).

**<sup>1</sup>H NMR** (500 MHz, Acetone-*d*<sub>6</sub>) δ(ppm): 7.56 (dt, *J* = 8.0, 1.0 Hz, 1H, ArH), 7.40 (dq, *J* = 8.5, 1.0 Hz, 1H, ArH), 7.26 (d, *J* = 3.0 Hz, 1H, ArH), 7.13 (ddd, *J* = 8.0, 7.0, 1.0 Hz, 1H, ArH), 7.02 (ddd, *J* = 8.0, 7.0, 1.0 Hz, 1H, ArH), 6.46 (dd, *J* = 3.0, 1.0 Hz, 1H, ArH), 4.94 (s, 2H, CH<sub>2</sub>N), 2.89 (s, 2H, CCH<sub>2</sub>C(=O)), 2.27 (t, *J* = 7.0 Hz, 2H, CH<sub>2</sub>CH<sub>2</sub>C(=O)), 2.19 – 2.11 (m, 2H, CH<sub>2</sub>CH<sub>2</sub>C(=O)), 2.01 – 1.97 (m, 3H, CH<sub>3</sub>).

**<sup>13</sup>C NMR** (126 MHz, Acetone-*d*<sub>6</sub>) δ(ppm): 208.8 (C=O), 137.5 (ArC), 129.9 (ArC), 129.8 (CH<sub>3</sub>C=C), 129.0 (ArCH), 128.0 (CH<sub>3</sub>C=C), 122.1 (ArCH), 121.5 (ArCH), 120.0 (ArCH), 110.4 (ArCH), 101.8 (ArCH), 47.6 (CH<sub>2</sub>N), 46.0 (CCH<sub>2</sub>C(=O)), 38.9 (CH<sub>2</sub>CH<sub>2</sub>C(=O)), 27.5 (CH<sub>2</sub>CH<sub>2</sub>C(=O)), 18.8 (CH<sub>3</sub>).

**IR** (powder) *v*<sub>max</sub>/cm<sup>-1</sup>: 2980, 2913 (C-H), 1715 (C=O).

**HRMS** (ES+) exact mass calculated for [M+H]<sup>+</sup> (C<sub>16</sub>H<sub>18</sub>NO)<sup>+</sup> requires *m/z* 240.1383, found *m/z* 240.1384.

**MP**: 72-74 °C.

**tert-butyl furan-2-yl((2-methyl-4-oxocyclohex-1-en-1-yl)methyl)carbamate (1n)**

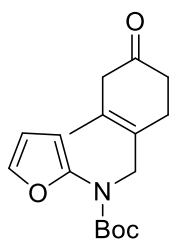

The title compound was prepared according to general procedure **C** from tert-butyl ((4,4-dimethoxy-2-methylcyclohex-1-en-1-yl)methyl)(furan-2-yl)carbamate (**S14**) (307 mg, 0.870 mmol). The crude product was purified by silica gel column chromatography (pentane/Et<sub>2</sub>O = 8/2 to 7/3) to afford the title compound as a colourless oil in 86% yield (229 mg).

**<sup>1</sup>H NMR** (500 MHz, Benzene-*d*<sub>6</sub>) δ(ppm): 6.83 (dd, *J* = 2.0, 1.0 Hz, 1H, NCCHCHCHO), 6.00 (dd, *J* = 3.0, 2.0 Hz, 1H, NCCHCHCHO), 5.76 (bs, 1H, NCCHCHCHO), 4.20 (s, 2H, CH<sub>2</sub>N), 2.36 (s, 2H, CCH<sub>2</sub>C(=O)), 2.25 – 2.18 (m, 2H, CH<sub>2</sub>CH<sub>2</sub>C(=O)), 2.12 (t, *J* = 7.0 Hz, 2H, CH<sub>2</sub>CH<sub>2</sub>C(=O)), 1.36 (s, 9H, C(CH<sub>3</sub>)<sub>3</sub>), 1.19 (s, 3H, C=CCH<sub>3</sub>).

**<sup>13</sup>C NMR** (126 MHz, Benzene-*d*<sub>6</sub>) δ(ppm): 207.5 (CH<sub>2</sub>C(=O)), 154.4 (NC(=O)), 148.8 (NCCHCHCHO), 138.6 (NCCHCHCHO), 129.5 (CH<sub>3</sub>C=C), 127.2 (CH<sub>3</sub>C=C), 111.1 (NCCHCHCHO), 102.4 (NCCHCHCHO), 80.8 (C(CH<sub>3</sub>)<sub>3</sub>), 49.1 (CH<sub>2</sub>N), 45.5 (CCH<sub>2</sub>C(=O)), 38.7 (CH<sub>2</sub>CH<sub>2</sub>C(=O)), 28.2 (C(CH<sub>3</sub>)<sub>3</sub>), 27.4 (CH<sub>2</sub>CH<sub>2</sub>C(=O)), 18.1 (CH<sub>3</sub>C=C).

**HRMS** (ES+) exact mass calculated for [M+H]<sup>+</sup> (C<sub>17</sub>H<sub>24</sub>NO<sub>4</sub>)<sup>+</sup> requires *m/z* 306.1700, found *m/z* 306.1701.

**benzyl furan-2-yl((2-methyl-4-oxocyclohex-1-en-1-yl)methyl)carbamate (1o)**

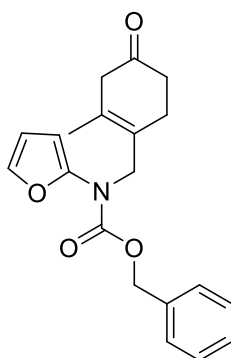

The title compound was prepared according to general procedure **C** from tert-butyl benzyl ((4,4-dimethoxy-2-methylcyclohex-1-en-1-yl)methyl)(furan-2-yl)carbamate (**S15**) (157 mg, 0.408 mmol). The crude product was purified by silica gel column chromatography (pentane/Et<sub>2</sub>O = 8/2 to 7/3) to afford the title compound as a colourless oil in 82% yield (114 mg).

**<sup>1</sup>H NMR** (500 MHz, Acetone-*d*<sub>6</sub>) δ(ppm): 7.42 – 7.24 (m, 6H, ArCH and NCCHCHCHO), 6.40 (dd, *J* = 3.5, 2.0 Hz, 1H, NCCHCHCHO), 6.17 (dd, *J* = 3.5, 1.0 Hz, 1H, NCCHCHCHO), 5.17 (s, 2H, CH<sub>2</sub>O), 4.38 (s, 2H, CH<sub>2</sub>N), 2.70 (s, 2H, CCH<sub>2</sub>C(=O)), 2.45 – 2.36 (m, 2H, CH<sub>2</sub>CH<sub>2</sub>C(=O)), 2.32 (m, 2H, CH<sub>2</sub>CH<sub>2</sub>C(=O)), 1.55 (s, 3H, CH<sub>3</sub>).

**<sup>13</sup>C NMR** (126 MHz, Acetone-*d*<sub>6</sub>) δ(ppm): 209.0 (CH<sub>2</sub>C(=O)), 155.9 (NC(=O)), 148.3 (NCCHCHCHO), 140.3 (NCCHCHCHO), 137.7 (ArC), 131.0 (CH<sub>3</sub>C), 129.3 (ArCH), 128.8 (ArCH), 128.3 (ArCH), 127.3 (CH<sub>3</sub>C=C), 111.9 (NCCHCHCHO), 104.2 (NCCHCHCHO), 68.1 (CH<sub>2</sub>O), 50.2 (CH<sub>2</sub>N), 46.0 (CCH<sub>2</sub>C(=O)), 39.1 (CH<sub>2</sub>CH<sub>2</sub>C(=O)), 28.0 (CH<sub>2</sub>CH<sub>2</sub>C(=O)), 18.4 (CH<sub>3</sub>).

**IR** (film) ν<sub>max</sub>/cm<sup>-1</sup>: 2981 (C-H), 1717 (C=O ester), 1612 (C=O ketone), 1395, 1277, 1154 (C-O).

**HRMS** (ES+) exact mass calculated for [M+H]<sup>+</sup> (C<sub>20</sub>H<sub>22</sub>NO<sub>4</sub>)<sup>+</sup> requires *m/z* 340.1543, found *m/z* 340.1544.



## 1.2.2 Substrates prepared via cobalt catalysed Diels-Alder reaction

### 4-((benzyloxy)methyl)cyclohex-3-en-1-one (1h)

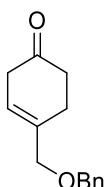

ii. According to a literature procedure,<sup>6</sup> ((prop-2-yn-1-yloxy)methyl)benzene (100 mg, 0.684 mmol, 1.00 eq) and (buta-1,3-dien-2-yloxy)trimethylsilane (181  $\mu$ l, 1.03 mmol, 1.50 eq) were added sequentially to a solution of CoBr<sub>2</sub>(DPPE) (42.0 mg, 0.0680 mmol, 0.100 eq), ZnI (44.0 mg, 0.137 mmol, 0.200 eq) and Zn (8.70 mg, 0.137 mmol, 0.200 eq) in CH<sub>2</sub>Cl<sub>2</sub> (0.68 ml) in a schlenk tube under an atmosphere of Ar. The reaction was stirred vigorously overnight. The reaction mixture was taken up in THF/H<sub>2</sub>O = 5/1 (6.8 ml) and added to a freshly prepared solution of TBAF (ca. 100 mg TBAB in sat. aq. KF solution (1.4 ml) brought to pH 7 by the addition of 1.0 M AcOH). The mixture was stirred vigorously for 1 h at which point the phases were separated. The reaction was diluted with H<sub>2</sub>O (20 ml) and the aqueous phase was extracted with EtOAc (3 x 20 ml). The combined organic layers were washed with brine, dried over Na<sub>2</sub>SO<sub>4</sub>, filtered, and concentrated *in vacuo*. The crude product was taken up in Et<sub>2</sub>O (10 ml), filtered through a plug of celite, and concentrated *in vacuo*. The crude product was purified by silica gel column chromatography (pentane/Et<sub>2</sub>O = 9/1 to 8/2) to provide the title compound as a colourless oil in 64% yield (94 mg).

<sup>1</sup>H NMR (400 MHz, Acetone-*d*<sub>6</sub>)  $\delta$ (ppm): 7.40 – 7.31 (m, 4H, ArCH), 7.28 (m, 1H, ArCH), 5.79 (tt,  $J = 3.5, 1.5$  Hz, 1H, C=CH), 4.50 (s, 2H, CH<sub>2</sub>Ph), 4.03 – 3.99 (m, 2H, CH<sub>2</sub>OCH<sub>2</sub>Ph), 2.87 – 2.82 (m, 2H, CHCH<sub>2</sub>C(=O)), 2.53 – 2.41 (m, 4H, CH<sub>2</sub>CH<sub>2</sub>C(=O) and CH<sub>2</sub>CH<sub>2</sub>C(=O)).

<sup>13</sup>C NMR (151 MHz, Acetone-*d*<sub>6</sub>)  $\delta$ (ppm): 209.0 (C=O), 139.8 (ArC), 136.8 (C=CH), 129.1 (ArCH), 128.4 (ArCH), 128.2 (ArCH), 122.0 (C=CH), 73.9 (CH<sub>2</sub>OCH<sub>2</sub>Ph), 72.4 (CH<sub>2</sub>OCH<sub>2</sub>Ph), 39.8 (CHCH<sub>2</sub>C(=O)), 38.7 (CH<sub>2</sub>CH<sub>2</sub>C(=O)), 26.7 (CH<sub>2</sub>CH<sub>2</sub>C(=O)).

IR (film)  $\nu_{\max}/\text{cm}^{-1}$ : 2980, 2889, 2852 (C-H), 1714 (C=O), 1073 (C-O), 737, 697 (C-H).

HRMS (ES<sup>+</sup>) exact mass calculated for [M+Na]<sup>+</sup> (C<sub>14</sub>H<sub>16</sub>NaO<sub>2</sub>)<sup>+</sup> requires  $m/z$  239.1043, found  $m/z$  239.1045.

### 5',6'-dihydro-[1,1':2',1''-terphenyl]-4'(3'H)-one (1p)

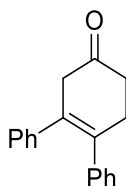

According to a literature procedure,<sup>6</sup> 1,2-diphenylethyne (96.2 mg, 0.54 mmol, 1.00 eq) and (buta-1,3-dien-2-yloxy)trimethylsilane (119 mg, 0.810 mmol, 1.50 eq) were added sequentially to a solution of CoBr<sub>2</sub>(DPPE) (33.3 mg, 0.0540 mmol, 0.100 eq), ZnI<sub>2</sub> (32.5 mg, 0.108 mmol, 0.200 eq) and Zn (7.06 mg, 0.108 mmol, 0.200 eq) in CH<sub>2</sub>Cl<sub>2</sub> (0.54 ml). The reaction was stirred vigorously under Ar overnight. The reaction mixture was taken up in THF/H<sub>2</sub>O = 5/1 (5.4 ml) and added to a freshly prepared solution of TBAF (ca. 100 mg TBAB in sat. aq. KF solution (1.08 ml) brought to pH 7 by the addition of 1.0 M AcOH). The mixture was stirred vigorously for 1 h at which point the phases were separated. The organic layer was taken up in Et<sub>2</sub>O (10 ml), washed with H<sub>2</sub>O (3 x 20 ml), brine, dried over Na<sub>2</sub>SO<sub>4</sub>, filtered and concentrated *in vacuo*. The crude product was purified by trituration with Et<sub>2</sub>O to afford the title compound as a white solid in 26% yield (35.3 mg).

<sup>1</sup>H NMR (500 MHz, CDCl<sub>3</sub>) δ(ppm): 7.18 – 7.08 (m, 6H, ArH), 7.00 (m, 4H, ArH), 3.35 (t, *J* = 1.5 Hz, 2H, CCH<sub>2</sub>C(=O)), 2.94 (tt, *J* = 7.0, 1.5 Hz, 2H, CH<sub>2</sub>CH<sub>2</sub>C(=O)), 2.72 (t, *J* = 7.0 Hz, 2H, CH<sub>2</sub>CH<sub>2</sub>C(=O));

<sup>13</sup>C NMR (126 MHz, CDCl<sub>3</sub>) δ(ppm): 210.2 (C=O), 141.8 (ArC), 141.1 (ArC), 135.6 (C=CCH<sub>2</sub>C(=O)), 132.0 (C=CCH<sub>2</sub>C(=O)), 129.0 (ArCH), 129.0 (ArCH), 128.2 (ArCH), 128.1 (ArCH), 126.8 (ArCH), 126.7 (ArCH), 45.9 (CCH<sub>2</sub>C(=O)), 38.8 (CH<sub>2</sub>CH<sub>2</sub>C(=O)), 32.0 (CH<sub>2</sub>CH<sub>2</sub>C(=O));

IR (powder)  $\nu_{\max}/\text{cm}^{-1}$ : 1714 (C=O), 1666 (C=C), 754, 698 (C-H).

Data is consistent with that published in the literature.<sup>7</sup>

### 3,4-diethylcyclohex-3-en-1-one (1q)

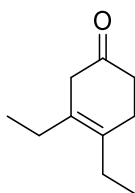

According to a literature procedure,<sup>6</sup> hex-3-yne (500 mg, 6.09 mmol, 1.00 eq) and (buta-1,3-dien-2-yloxy)trimethylsilane (1.61 ml, 9.13 mmol, 1.50 eq) were added sequentially to a solution of  $\text{CoBr}_2(\text{py-imine})$  (270 mg, 0.609 mmol, 0.100 eq),  $\text{ZnI}_2$  (389 mg, 1.22 mmol, 0.200 eq) and Zn (79.6 mg, 1.22 mmol, 0.200 eq) in  $\text{CH}_2\text{Cl}_2$  (6 ml). The reaction was stirred vigorously under Ar overnight. The reaction mixture was taken up in  $\text{THF}/\text{H}_2\text{O} = 5/1$  (60 ml) and added to a freshly prepared solution of TBAF (1 g of TBAB in sat. aq. KF solution (12 ml) brought to pH 7 by the addition of 1.0 M AcOH). The mixture was stirred vigorously for 1 h at which point  $\text{Et}_2\text{O}$  (30 ml) was added and the phases were separated. The aqueous layer was extracted with  $\text{Et}_2\text{O}$  (2 x 30 ml) and the combined organic layers were washed with brine, dried over  $\text{Na}_2\text{SO}_4$ , filtered and concentrated *in vacuo*. The crude product was purified by silica gel column chromatography (pentane/ $\text{Et}_2\text{O} = 9/1$ ) to afford the desired compound as a colourless oil in 66% yield (616 mg).

**$^1\text{H}$  NMR** (500 MHz, Benzene- $d_6$ )  $\delta$ (ppm): 2.59 (s, 2H,  $\text{CCH}_2\text{C}(=\text{O})$ ), 2.12 (t,  $J = 7.0$  Hz, 2H,  $\text{CH}_2\text{CH}_2\text{C}(=\text{O})$ ), 1.92 (t,  $J = 7.0$  Hz, 2H,  $\text{CH}_2\text{CH}_2\text{C}(=\text{O})$ ), 1.81 (q,  $J = 7.5$  Hz, 2H,  $\text{CH}_3\text{CH}_2\text{C}=\text{CCH}_2\text{C}(=\text{O})$ ), 1.73 (q,  $J = 7.5$  Hz, 2H,  $\text{CH}_3\text{CH}_2\text{CCH}_2\text{C}(=\text{O})$ ), 0.79 (t,  $J = 7.5$  Hz, 3H,  $\text{CH}_3\text{CH}_2\text{C}=\text{CCH}_2\text{C}(=\text{O})$ ), 0.74 (t,  $J = 7.5$  Hz, 3H,  $\text{CH}_3\text{CH}_2\text{CCH}_2\text{C}(=\text{O})$ ).

**$^{13}\text{C}$  NMR** (126 MHz,  $\text{C}_6\text{D}_6$ )  $\delta$ (ppm): 208.6 ( $\text{C}=\text{O}$ ), 132.2 ( $\text{C}=\text{CCH}_2\text{C}(=\text{O})$ ), 129.5 ( $\text{C}=\text{CCH}_2\text{C}(=\text{O})$ ), 43.1 ( $\text{CCH}_2\text{C}(=\text{O})$ ), 39.0 ( $\text{CH}_2\text{CH}_2\text{C}(=\text{O})$ ), 29.1 ( $\text{CH}_2\text{CH}_2\text{C}(=\text{O})$ ), 25.7 (2 x  $\text{CH}_2\text{CH}_3$ ), 13.1 ( $\text{CH}_3\text{CH}_2\text{C}=\text{CCH}_2\text{C}(=\text{O})$ ), 13.0 ( $\text{CH}_3\text{CH}_2\text{CCH}_2\text{C}(=\text{O})$ ).

**HRMS** (ES+) exact mass calculated for  $[\text{M}+\text{H}]^+$  ( $\text{C}_{10}\text{H}_{17}\text{O}$ )<sup>+</sup> requires  $m/z$  153.1274, found  $m/z$  153.1275.

### 3,4-dipropylcyclohex-3-en-1-one (1r)

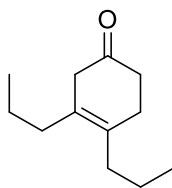

According to a literature procedure,<sup>6</sup> oct-4-yne (671 mg, 6.09 mmol, 1.00 eq) and (buta-1,3-dien-2-yloxy)trimethylsilane (1.61 ml, 9.13 mmol, 1.50 eq) were added sequentially to a solution of CoBr<sub>2</sub>(py-imine) (270 mg, 0.609 mmol, 0.100 eq), ZnI<sub>2</sub> (389 mg, 1.22 mmol, 0.200 eq) and Zn (79.6 mg, 1.22 mmol, 0.200 eq) in CH<sub>2</sub>Cl<sub>2</sub> (6 ml). The reaction was stirred vigorously under Ar overnight. The reaction mixture was taken up in THF/H<sub>2</sub>O = 5/1 (60 ml) and added to a freshly prepared solution of (1 g of TBAB in sat. aq. KF solution (12 ml) brought to pH 7 by the addition of 1.0 M AcOH). The mixture was stirred vigorously for 1 h at which point Et<sub>2</sub>O (30 ml) was added and the phases were separated. The aqueous layer was extracted with Et<sub>2</sub>O (2 x 30 ml) and the combined organic layers were washed with brine, dried over Na<sub>2</sub>SO<sub>4</sub>, filtered and concentrated *in vacuo*. The crude product was purified by silica gel column chromatography (pentane/Et<sub>2</sub>O = 95/5 followed by pentane/CH<sub>2</sub>Cl<sub>2</sub> = 7/3 to 6/4 to remove an impurity) to afford the desired compound as a colourless oil in 21% yield (233 mg).

<sup>1</sup>H NMR (500 MHz, Benzene-*d*<sub>6</sub>) δ(ppm): 2.61 (s, 2H, CCH<sub>2</sub>C(=O)), 2.13 (t, *J* = 7.0 Hz, 2H, CH<sub>2</sub>CH<sub>2</sub>C(=O)), 1.98 – 1.91 (m, 2H, CH<sub>2</sub>CH<sub>2</sub>C(=O)), 1.90 – 1.83 (m, 2H, CH<sub>3</sub>CH<sub>2</sub>CH<sub>2</sub>C=CCH<sub>2</sub>C(=O)), 1.82 – 1.76 (m, 2H, CH<sub>3</sub>CH<sub>2</sub>CH<sub>2</sub>CCH<sub>2</sub>C(=O)), 1.27 – 1.14 (m, 4H, CH<sub>3</sub>CH<sub>2</sub>CH<sub>2</sub>C=CCH<sub>2</sub>C(=O) and CH<sub>3</sub>CH<sub>2</sub>CH<sub>2</sub>CCH<sub>2</sub>C(=O)), 0.80 (t, *J* = 7.5 Hz, 3H, CH<sub>3</sub>CH<sub>2</sub>CH<sub>2</sub>C=CCH<sub>2</sub>C(=O)), 0.76 (t, *J* = 7.4 Hz, 3H, CH<sub>3</sub>CH<sub>2</sub>CH<sub>2</sub>CCH<sub>2</sub>C(=O)).

<sup>13</sup>C NMR (126 MHz, Benzene-*d*<sub>6</sub>) δ(ppm): 208.6 (C=O), 131.6 (C=CCH<sub>2</sub>C(=O)), 128.7 (C=CCH<sub>2</sub>C(=O)), 43.7 (CCH<sub>2</sub>C(=O)), 38.8 (CH<sub>2</sub>CH<sub>2</sub>C(=O)), 34.9 (CH<sub>3</sub>CH<sub>2</sub>CH<sub>2</sub>C=CCH<sub>2</sub>C(=O)), 34.7 (CH<sub>3</sub>CH<sub>2</sub>CH<sub>2</sub>CCH<sub>2</sub>C(=O)), 29.4 (CH<sub>2</sub>CH<sub>2</sub>C(=O)), 21.7 (CH<sub>3</sub>CH<sub>2</sub>CH<sub>2</sub>C=CCH<sub>2</sub>C(=O)), 21.5 (CH<sub>3</sub>CH<sub>2</sub>CH<sub>2</sub>CCH<sub>2</sub>C(=O)), 14.2 (CH<sub>3</sub>CH<sub>2</sub>CH<sub>2</sub>C=CCH<sub>2</sub>C(=O)), 14.1 (CH<sub>3</sub>CH<sub>2</sub>CH<sub>2</sub>CCH<sub>2</sub>C(=O)).

IR (film) ν<sub>max</sub>/cm<sup>-1</sup>: 2959, 2871 (C-H), 1717 (C=O).

HRMS (ES<sup>+</sup>) exact mass calculated for [M+H]<sup>+</sup> (C<sub>12</sub>H<sub>21</sub>O)<sup>+</sup> requires *m/z* 181.1587, found *m/z* 181.1589.

### 6-methyl-4,5-dihydro-[1,1'-biphenyl]-3(2H)-one (1s)

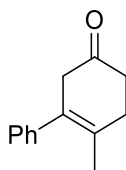

According to a literature procedure,<sup>6</sup> prop-1-yn-1-ylbenzene (0.348 mg, 3.00 mmol, 1.00 eq) and (buta-1,3-dien-2-yloxy)trimethylsilane (0.780 ml, 4.50 mmol, 1.50 eq) were added sequentially to a solution of CoBr<sub>2</sub>(py-imine) (132 mg, 0.300 mmol, 0.100 eq), ZnI<sub>2</sub> (192 mg, 0.600 mmol, 0.200 eq) and Zn (39.3 mg, 0.600 mmol, 0.200 eq) in CH<sub>2</sub>Cl<sub>2</sub> (3 ml). The reaction was stirred vigorously under Ar overnight. The reaction mixture was taken up in THF/H<sub>2</sub>O = 5/1 (30 ml) and added to a freshly prepared solution of TBAF (600 mg of TBAB in sat. aq. KF solution (6 ml) brought to pH 7 by the addition of 1.0 M AcOH). The mixture was stirred vigorously for 1 h at which point Et<sub>2</sub>O (20 ml) was added and the phases were separated. The aqueous layer was extracted with Et<sub>2</sub>O (2 x 20 ml) and the combined organic layers were washed with brine, dried over Na<sub>2</sub>SO<sub>4</sub>, filtered and concentrated *in vacuo*. The crude product was purified by silica gel column chromatography (pentane/Et<sub>2</sub>O = 95/5 to 9/1) to afford the desired compound as a colourless oil in 40% yield (223 mg).

<sup>1</sup>H NMR (500 MHz, Acetone-*d*<sub>6</sub>) δ(ppm): 7.41 – 7.31 (m, 2H, ArH), 7.30 – 7.17 (m, 3H, ArH), 3.09 – 3.04 (m, 2H, CCH<sub>2</sub>C(=O)), 2.59 – 2.48 (m, 4H, CH<sub>2</sub>CH<sub>2</sub>C(=O)), 1.72 – 1.69 (m, 3H, CH<sub>3</sub>).

<sup>13</sup>C NMR (126 MHz, Acetone-*d*<sub>6</sub>) δ(ppm): 209.1 (C=O), 142.8 (ArC), 130.8 (CH<sub>3</sub>C=C or CH<sub>3</sub>C=C), 130.8 (CH<sub>3</sub>C=C or CH<sub>3</sub>C=C), 129.1 (ArCH), 129.1 (ArCH), 127.5 (ArCH), 45.8 (CCH<sub>2</sub>C(=O)), 38.9 (CH<sub>2</sub>CH<sub>2</sub>C(=O)), 32.1 (CH<sub>2</sub>CH<sub>2</sub>C(=O)), 20.3 (CH<sub>3</sub>).

IR (film) ν<sub>max</sub>/cm<sup>-1</sup>: 2980, 2908, 2889 (C-H), 1713 (C=O).

HRMS (ES+) exact mass calculated for [M+H]<sup>+</sup> (C<sub>13</sub>H<sub>15</sub>O)<sup>+</sup> requires *m/z* 187.1117, found *m/z* 187.1120.

#### 4'-methoxy-6-methyl-4,5-dihydro-[1,1'-biphenyl]-3(2H)-one (1t)

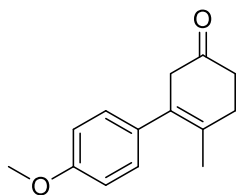

According to a literature procedure,<sup>6</sup> 1-methoxy-4-(prop-1-yn-1-yl)benzene (439 mg, 3.00 mmol, 1.00 eq) and (buta-1,3-dien-2-yloxy)trimethylsilane (0.780 ml, 4.50 mmol, 1.50 eq) were added sequentially to a solution of  $\text{CoBr}_2(\text{py-imine})$  (132 mg, 0.300 mmol, 0.100 eq),  $\text{ZnI}_2$  (192 mg, 0.600 mmol, 0.200 eq) and  $\text{Zn}$  (39.3 mg, 0.600 mmol, 0.200 eq) in  $\text{CH}_2\text{Cl}_2$  (3 ml). The reaction was stirred vigorously under Ar overnight. The reaction mixture was taken up in  $\text{THF}/\text{H}_2\text{O} = 5/1$  (30 ml) and added to a freshly prepared solution of TBAF (ca. 600 mg TBAB in sat. aq. KF solution (6 ml) brought to pH 7 by the addition of AcOH). The mixture was stirred vigorously for 1 h at which point the phases were separated. The organic layer was taken up in  $\text{Et}_2\text{O}$  (20 ml), washed with  $\text{H}_2\text{O}$  (3 x 30 ml), brine, dried over  $\text{Na}_2\text{SO}_4$ , filtered and concentrated *in vacuo*. The crude product was purified by silica gel column chromatography (pentane/ $\text{Et}_2\text{O} = 95/5$  to 9/1) to afford the desired compound as a yellow oil in 36% yield (234 mg).

**$^1\text{H}$  NMR** (500 MHz, Acetone- $d_6$ )  $\delta$ (ppm): 7.16 – 7.10 (m, 2H, ArH), 6.94 – 6.89 (m, 2H, ArH), 3.80 (s, 3H, OCH<sub>3</sub>), 3.06 – 3.01 (m, 2H, CCH<sub>2</sub>C(=O)), 2.56 – 2.46 (m, 4H, CH<sub>2</sub>CH<sub>2</sub>C(=O)), 1.72 – 1.69 (m, 3H, CCH<sub>3</sub>).

**$^{13}\text{C}$  NMR** (126 MHz, Acetone- $d_6$ )  $\delta$ (ppm): 209.2 (C=O), 159.4 (ArC), 135.0 (ArC), 130.3 (CH<sub>3</sub>C=C or CH<sub>3</sub>C=C), 130.3 (CH<sub>3</sub>C=C or CH<sub>3</sub>C=C), 130.2 (ArCH), 114.4 (ArCH), 55.5 (OCH<sub>3</sub>), 45.9 (CCH<sub>2</sub>C(=O)), 38.9 (CH<sub>2</sub>CH<sub>2</sub>C(=O)), 32.1 (CH<sub>2</sub>CH<sub>2</sub>C(=O)), 20.4 (CH<sub>3</sub>C).

**IR** (film)  $\nu_{\text{max}}/\text{cm}^{-1}$ : 2910, 2838 (C-H), 1715 (C=O), 1510 (C=C), 1244 (C-O).

**HRMS** (ES+) exact mass calculated for  $[\text{M}+\text{H}]^+$  ( $\text{C}_{14}\text{H}_{17}\text{O}_2$ )<sup>+</sup> requires  $m/z$  217.1223, found  $m/z$  217.1226.

### 1.3 Optimisation of reaction conditions

Reactions were carried out on a 0.065 mmol scale following general procedures **D** and **E**.

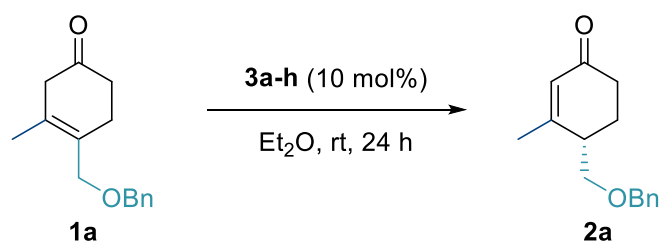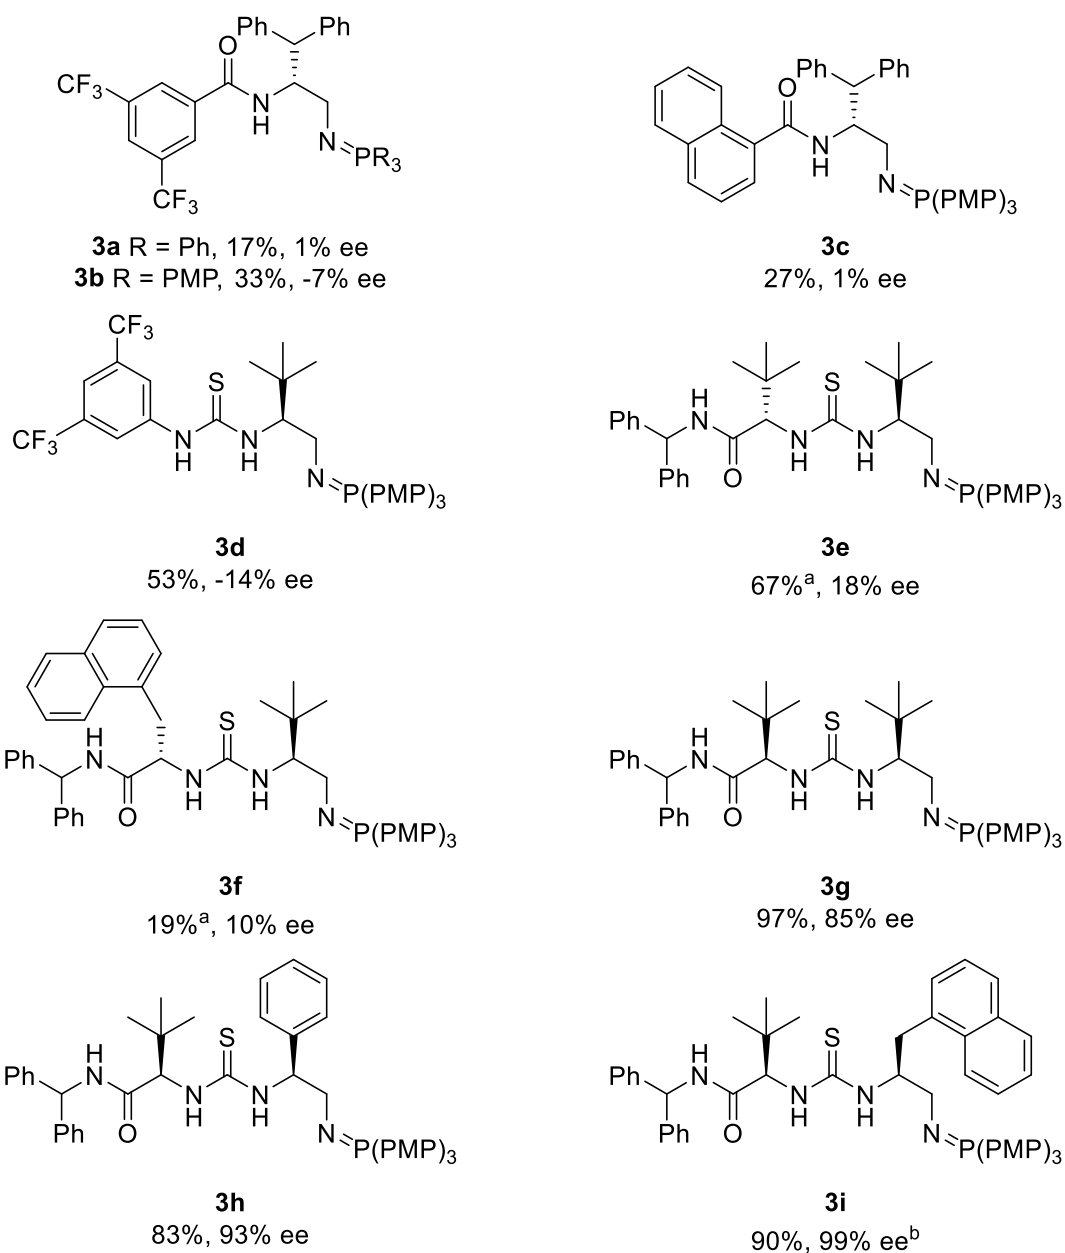

<sup>a</sup>NMR yield. <sup>b</sup>Reaction was carried out with 0.26 mmol of substrate.

Reactions were carried out on a 0.065 mmol scale following general procedures **D** and **E**.

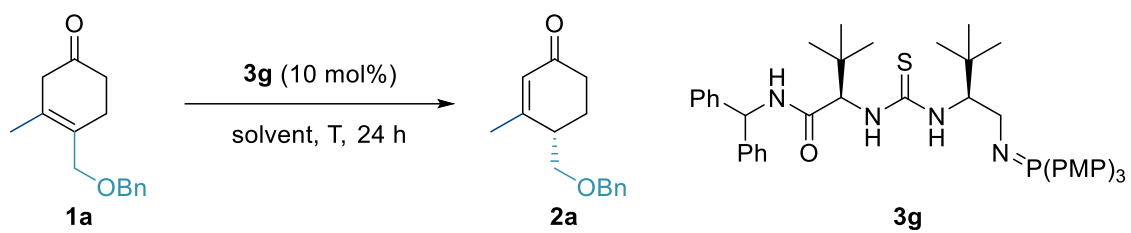

| entry | solvent           | temp (°C) | conc (M) | yield (%) | ee (%) |
|-------|-------------------|-----------|----------|-----------|--------|
| 1     | Et <sub>2</sub> O | rt        | 0.10     | 97        | 85     |
| 2     | THF               | rt        | 0.10     | 49        | 46     |
| 3     | TBME              | rt        | 0.10     | 93        | 69     |



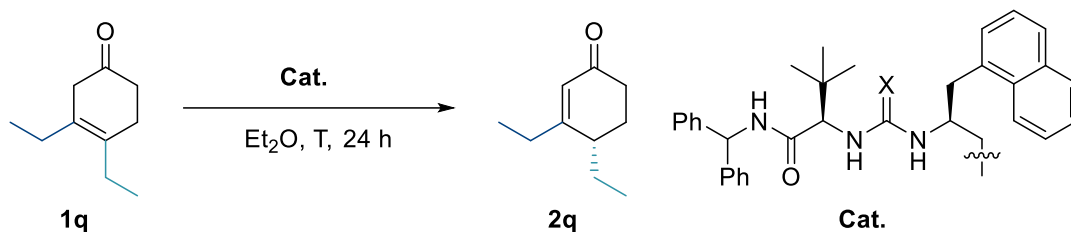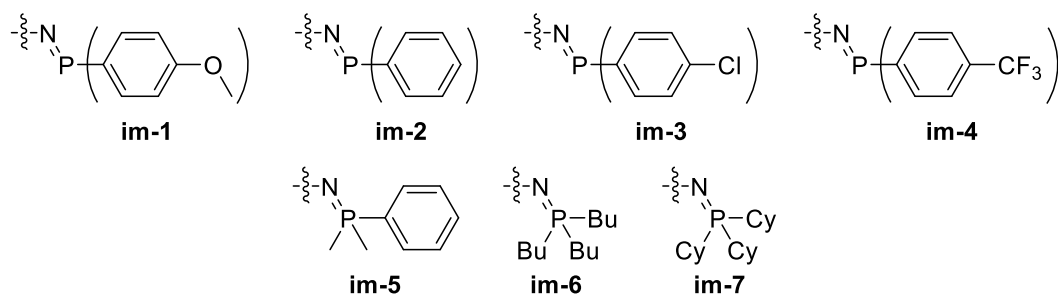

| entry | X | im   | loading (mol%) | temp ( $^{\circ}\text{C}$ ) | conc (M) | yield (%) | ee (%) |
|-------|---|------|----------------|-----------------------------|----------|-----------|--------|
| 1     | S | im-1 | 10             | rt                          | 0.10     | 0         | N/A    |
| 2     | S | im-2 | 10             | rt                          | 0.10     | 0         | N/A    |
| 3     | S | im-3 | 10             | rt                          | 0.10     | 0         | N/A    |
| 4     | S | im-4 | 10             | rt                          | 0.10     | 0         | N/A    |
| 5     | S | im-5 | 10             | rt                          | 0.10     | trace     | 88     |
| 6     | S | im-6 | 10             | rt                          | 0.10     | 20        | 87     |
| 7     | S | im-6 | 10             | rt                          | 0.35     | 39        | 87     |
| 8     | O | im-6 | 10             | rt                          | 0.10     | 45        | 98     |
| 9     | O | im-6 | 10             | rt                          | 0.20     | 65        | 98     |
| 10    | O | im-6 | 10             | rt                          | 0.40     | 32        | 97     |
| 11    | O | im-6 | 10             | 40                          | 0.20     | 45        | 98     |
| 12    | O | im-6 | 15             | rt                          | 0.15     | 63        | 97     |
| 13    | O | im-6 | 20             | rt                          | 0.20     | 63        | 97     |

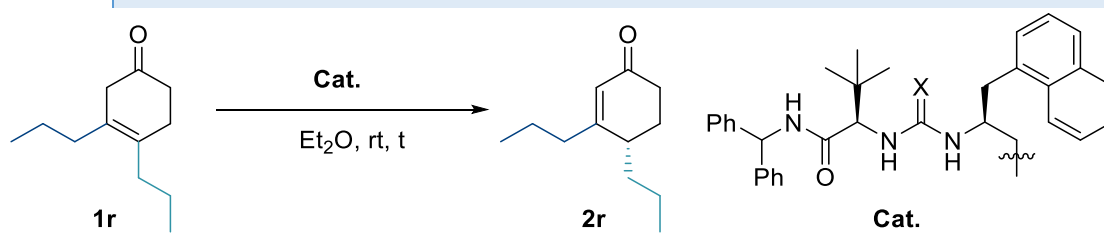

| entry | X | im   | loading (mol%) | time (h) | conc (M) | yield (%) | ee (%) |
|-------|---|------|----------------|----------|----------|-----------|--------|
| 1     | O | im-6 | 10             | 24       | 0.20     | 39        | 97     |
| 2     | O | im-7 | 10             | 24       | 0.20     | trace     | N/D    |
| 3     | O | im-6 | 10             | 48       | 0.35     | 42        | 91     |
| 4     | O | im-6 | 15             | 24       | 0.20     | 50        | 97     |
| 5     | O | im-6 | 20             | 24       | 0.20     | 36        | 97     |

## 1.4 The BIMP catalysed enantioselective prototropic shift of $\beta,\gamma$ -unsaturated cyclohexenones

### General procedure D: BIMP formation

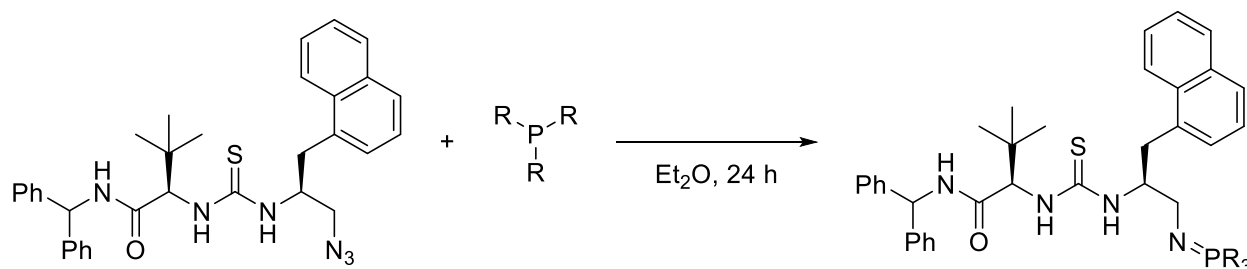

To a mass spectrometry vial was weighed the desired azide (1.00 eq) and the desired phosphine (1.00 eq). The vial was placed under an atmosphere of Ar and  $Et_2O$  (0.05M) was added. The cap was replaced and sealed with parafilm<sup>®</sup> and the mixture was stirred for 18 – 24 h.

### General procedure E: The prototropic shift

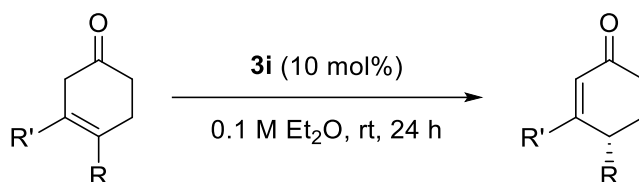

The preformed BIMP catalyst **3i** (0.100 eq) was concentrated to dryness under a stream of Ar without exposure to air. The desired substrate (1.00 eq) was taken up in  $Et_2O$  (0.10 M) under an atmosphere of Ar and transferred to the vial containing the BIMP catalyst. The reaction was stirred for 24 h under Ar at which point the reaction mixture is transferred directly onto silica gel and the products were purified by silica gel column chromatography.

### General procedure F: The prototropic shift

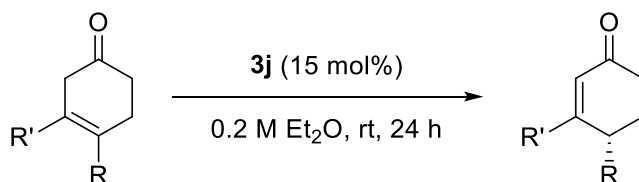

The preformed BIMP catalyst **3j** (0.15 eq) was concentrated to dryness under a stream of Ar without exposure to air. The desired substrate (1.00 eq) was taken up in  $Et_2O$  (0.20 M) under an atmosphere of Ar and transferred to the vial containing the BIMP catalyst. The reaction was stirred for 24 h under Ar at which point the reaction mixture was transferred directly onto silica gel and the products were purified by silica gel column chromatography.

**(S)-4-((benzyloxy)methyl)-3-methylcyclohex-2-en-1-one (2a)**

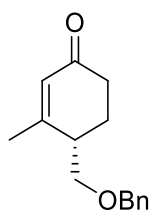

The title compound was prepared according to general procedure **E** from 4-((benzyloxy)methyl)-3-methylcyclohex-3-en-1-one (**1a**) (59.9 mg, 0.260 mmol). The crude reaction mixture was transferred directly onto silica and purified by silica gel column chromatography (pentane/EtOAc = 9/1 to 8/2) to provide the title compound as a colourless oil in 90% yield (54.2 mg) and 99% ee. [determined by HPLC chiralpak AS-H, hexane/isopropanol = 70/30, 1 ml/min,  $\lambda$  = 220 nm,  $t$ (major) = 15.19 min,  $t$ (minor) = 22.07 min].

$^1\text{H NMR}$  (500 MHz,  $\text{CDCl}_3$ )  $\delta$ (ppm): 7.41 – 7.26 (m, 5H, ArH), 5.92 – 5.88 (m, 1H,  $\text{CHC}(=\text{O})$ ), 4.57 (d,  $J$  = 12.0 Hz, 1H,  $\text{CH}_\text{A}\text{H}_\text{B}\text{Ph}$ ), 4.51 (d,  $J$  = 12.0 Hz, 1H,  $\text{CH}_\text{A}\text{H}_\text{B}\text{Ph}$ ), 3.60 (d,  $J$  = 6.0 Hz, 2H,  $\text{CHCH}_2\text{O}$ ), 2.57 (p,  $J$  = 5.5 Hz, 1H,  $\text{CHCH}_2$ ), 2.45 (ddd,  $J$  = 17.5, 10.0, 5.5 Hz, 1H, one of  $\text{CH}_\text{A}\text{H}_\text{B}\text{C}(=\text{O})$ ), 2.35 – 2.26 (m, 1H, one of  $\text{CH}_\text{A}\text{H}_\text{B}\text{C}(=\text{O})$ ), 2.11 (m, 2H,  $\text{CH}_2\text{CH}_2\text{C}(=\text{O})$ ), 1.98 (m, 3H,  $\text{CH}_3$ ).

$^{13}\text{C NMR}$  (126 MHz,  $\text{CDCl}_3$ )  $\delta$ (ppm): 199.4 ( $\text{C}=\text{O}$ ), 162.4 ( $\text{CCH}_3$ ), 138.0 (ArC), 128.6 (ArCH), 128.3 ( $\text{C}=\text{CCH}_3$ ), 127.9 (ArCH), 127.7 (ArCH), 73.4 ( $\text{CH}_2\text{Ph}$ ), 70.5 ( $\text{CHCH}_2\text{O}$ ), 40.4 ( $\text{CHCH}_2\text{O}$ ), 34.6 ( $\text{CH}_2\text{C}(=\text{O})$ ), 25.8 ( $\text{CH}_2\text{CH}_2\text{C}(=\text{O})$ ), 23.1 ( $\text{CH}_3$ ).

$[\alpha]_D^{25} = -91.22$  ( $c$  2.01,  $\text{CHCl}_3$ ) (99% ee); lit:  $[\alpha]_D^{25} = +65.8$  ( $c$  1.98,  $\text{CHCl}_3$ ) 81% ee, (R)-4-((benzyloxy)methyl)-3-methylcyclohex-2-en-1-one.<sup>8a</sup>  $[\alpha]_D^{22} = +62.6$  ( $c$  1.05,  $\text{CHCl}_3$ ), (R)-4-((benzyloxy)methyl)-3-methylcyclohex-2-en-1-one.<sup>8b</sup>

Data is consistent with that published in the literature.<sup>8a-b</sup>

**(S)-4-(methoxymethyl)-3-methylcyclohex-2-en-1-one (2b)**

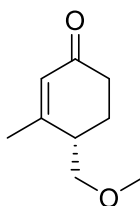

The title compound was prepared according to general procedure **E** from 4-(methoxymethyl)-3-methylcyclohex-3-en-1-one (**1b**) (20.0 mg, 0.130 mmol). The crude reaction mixture was transferred directly onto silica and purified by silica gel column chromatography (pentane/Et<sub>2</sub>O = 7/3) to provide the title compound as a colourless oil in 58% yield (11.6 mg) and 96% ee. [determined by HPLC chiralpak AD-H, hexane/isopropanol = 95/5, 1 ml/min,  $\lambda$  = 230 nm,  $t$ (major) = 8.24 min,  $t$ (minor) = 8.90 min].

<sup>1</sup>H NMR (500 MHz, Benzene-*d*<sub>6</sub>)  $\delta$ (ppm): 5.92 – 5.90 (m, 1H, CHC(=O)), 2.97 – 2.90 (m, 5H, OCH<sub>3</sub> and OCH<sub>2</sub>), 2.30 (ddd,  $J$  = 17.0, 10.0, 5.0 Hz, 1H, one of CH<sub>A</sub>H<sub>B</sub>C(=O)), 2.10 (ddd,  $J$  = 17.0, 7.5, 5.0 Hz, 1H, one of CH<sub>A</sub>H<sub>B</sub>C(=O)), 1.96 (p,  $J$  = 5.5 Hz, 1H, CHCH<sub>2</sub>O), 1.79 – 1.71 (m, 1H, one of CH<sub>A</sub>H<sub>B</sub>CH<sub>2</sub>C(=O)), 1.59 (ddt,  $J$  = 13.5, 10.0, 5.0 Hz, 1H, one of CH<sub>A</sub>H<sub>B</sub>CH<sub>2</sub>C(=O)), 1.47 (s, 3H, CH<sub>3</sub>C).

<sup>13</sup>C NMR (126 MHz, Benzene-*d*<sub>6</sub>)  $\delta$ (ppm): 197.1 (C=O), 160.4 (CCH<sub>3</sub>), 128.6 (C=CH), 73.2 (CH<sub>2</sub>O), 58.6 (CH<sub>3</sub>O), 40.3 (CHCH<sub>2</sub>O), 34.9 (CH<sub>2</sub>C(=O)), 25.9 (CH<sub>2</sub>CH<sub>2</sub>C(=O)), 22.6 (CCH<sub>3</sub>).

IR (film)  $\nu_{\text{max}}$ /cm<sup>-1</sup>: 2926, 2873 (C-H), 1667 (C=O), 1625 (C=C), 1207 (C-O).

HRMS (ES+) exact mass calculated for [M+H]<sup>+</sup> (C<sub>9</sub>H<sub>15</sub>O<sub>2</sub>)<sup>+</sup> requires  $m/z$  155.1067, found  $m/z$  155.1066.

IR (film)  $\nu_{\text{max}}$ /cm<sup>-1</sup>: 2926, 2873, 2830 (C-H), 1666 (C=O), 1112 (C-O).

$[\alpha]_D^{25}$  = -84 ( $c$  0.265, CHCl<sub>3</sub>).

**(S)-4-((allyloxy)methyl)-3-methylcyclohex-2-en-1-one (2c)**

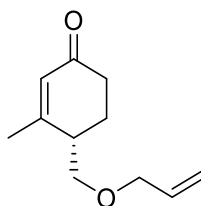

The title compound was prepared according to general procedure **E** from 4-((allyloxy)methyl)-3-methylcyclohex-3-en-1-one (**1c**) (23.4 mg, 0.130 mmol). The crude reaction mixture was transferred directly onto silica and purified by silica gel column chromatography (pentane/Et<sub>2</sub>O = 8/2) to provide the title compound as a colourless oil in 78% yield (18.3 mg) and 98% ee. [determined by HPLC chiralpak AS-H, hexane/isopropanol = 70/30, 1 ml/min,  $\lambda$  = 240 nm, t(major) = 12.70 min, t(minor) = 17.07 min].

**<sup>1</sup>H NMR** (400 MHz, CDCl<sub>3</sub>)  $\delta$ (ppm): 5.94 – 5.83 (m, 2H,  $\underline{\text{C}}\underline{\text{H}}=\underline{\text{C}}\underline{\text{H}}_2$  and  $\underline{\text{C}}\underline{\text{H}}\underline{\text{C}}(=\text{O})$ ), 5.26 (dq,  $J$  = 17.0, 1.5 Hz, 1H, one of  $\text{C}\underline{\text{H}}=\underline{\text{C}}\underline{\text{H}}_{\text{A}}\underline{\text{H}}_{\text{B}}$ ), 5.18 (dq,  $J$  = 10.5, 1.5 Hz, 1H, one of  $\text{C}\underline{\text{H}}=\underline{\text{C}}\underline{\text{H}}_{\text{A}}\underline{\text{H}}_{\text{B}}$ ), 4.04 – 3.92 (m, 2H,  $\underline{\text{C}}\underline{\text{H}}_2\text{C}\underline{\text{H}}=\text{C}\underline{\text{H}}_2$ ), 3.57 – 3.54 (m, 2H,  $\underline{\text{C}}\underline{\text{H}}_2\text{C}\underline{\text{O}}\underline{\text{C}}\underline{\text{H}}_2\text{C}\underline{\text{H}}=\text{C}\underline{\text{H}}_2$ ), 2.54 (p,  $J$  = 5.5 Hz, 1H,  $\text{C}\underline{\text{H}}_2\text{C}\underline{\text{H}}\underline{\text{C}}\underline{\text{H}}_2\text{O}$ ), 2.51 – 2.41 (m, 1H, one of  $\underline{\text{C}}\underline{\text{H}}_{\text{A}}\underline{\text{H}}_{\text{B}}\underline{\text{C}}(=\text{O})$ ), 2.35 – 2.25 (m, 1H,  $\text{C}\underline{\text{H}}_{\text{A}}\underline{\text{H}}_{\text{B}}\underline{\text{C}}(=\text{O})$ ), 2.13 – 2.03 (m, 2H,  $\underline{\text{C}}\underline{\text{H}}_2\text{C}\underline{\text{H}}\underline{\text{C}}\underline{\text{H}}_2\text{O}$ ), 1.99 (dd,  $J$  = 1.5, 1.0 Hz, 3H,  $\underline{\text{C}}\underline{\text{H}}_3$ ).

**<sup>13</sup>C NMR** (101 MHz, CDCl<sub>3</sub>)  $\delta$ (ppm): 199.5 ( $\underline{\text{C}}=\underline{\text{O}}$ ), 162.5 ( $\underline{\text{C}}\underline{\text{C}}\underline{\text{H}}_3$ ), 134.5 ( $\underline{\text{C}}\underline{\text{H}}=\underline{\text{C}}\underline{\text{H}}_2$ ), 128.3 ( $\underline{\text{C}}=\underline{\text{C}}\underline{\text{H}}_3$ ), 117.4 ( $\text{C}\underline{\text{H}}=\underline{\text{C}}\underline{\text{H}}_2$ ), 72.3 ( $\underline{\text{C}}\underline{\text{H}}_2\text{C}\underline{\text{H}}=\text{C}\underline{\text{H}}_2$ ), 70.5 ( $\underline{\text{C}}\underline{\text{H}}_2\text{O}\underline{\text{C}}\underline{\text{H}}_2\text{C}\underline{\text{H}}=\text{C}\underline{\text{H}}_2$ ), 40.4 ( $\underline{\text{C}}\underline{\text{H}}\underline{\text{C}}\underline{\text{H}}_2\text{O}\underline{\text{C}}\underline{\text{H}}_2\text{C}\underline{\text{H}}=\text{C}\underline{\text{H}}_2$ ), 34.6 ( $\underline{\text{C}}\underline{\text{H}}_2\text{C}(=\text{O})$ ), 25.8 ( $\underline{\text{C}}\underline{\text{H}}_2\text{C}\underline{\text{H}}_2\text{C}(=\text{O})$ ), 23.2 ( $\underline{\text{C}}\underline{\text{H}}_3$ ).

**IR** (film)  $\nu_{\text{max}}/\text{cm}^{-1}$ : 2980, 2867 (C-H), 1667 (C=O), 1625 (C=C), 1135 (C-O), 925 (C=C-H).

**HRMS** (ES+) exact mass calculated for  $[\text{M}+\text{H}]^+$  (C<sub>11</sub>H<sub>17</sub>O<sub>2</sub>)<sup>+</sup> requires  $m/z$  181.1223, found  $m/z$  181.1223.

$[\alpha]_{\text{D}}^{25}$  = -116.7 ( $c$  0.185, CHCl<sub>3</sub>).

**(S)-3-methyl-4-(((3-methylbut-2-en-1-yl)oxy)methyl)cyclohex-2-en-1-one (2d)**

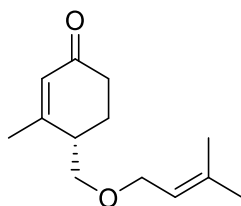

The title compound was prepared according to general procedure **E** from 3-methyl-4-(((3-methylbut-2-en-1-yl)oxy)methyl)cyclohex-3-en-1-one (**1d**) (27.1 mg, 0.130 mmol). The crude reaction mixture was transferred directly onto silica and purified by silica gel column chromatography (pentane/Et<sub>2</sub>O = 75/25) to provide the title compound as a yellow oil in 85% yield (23.0 mg) and 99% ee. [determined by HPLC chiralpak AS-H, hexane/isopropanol = 95/5, 1 ml/min,  $\lambda$  = 240 nm, t(major) = 39.05 min, t(minor) = 56.23 min].

**<sup>1</sup>H NMR** (500 MHz, CDCl<sub>3</sub>)  $\delta$ (ppm): 5.89 (t,  $J$  = 1.5 Hz, 1H, CHC(=O)), 5.36 – 5.29 (m, 1H, CHC(CH<sub>3</sub>)<sub>2</sub>), 4.04 – 3.92 (m, 2H, OCH<sub>2</sub>CH=C), 3.54 (d,  $J$  = 6.0 Hz, 2H, CH<sub>2</sub>OCH<sub>2</sub>CH=C), 2.53 (p,  $J$  = 5.5, 1H, CHCH<sub>2</sub>CH<sub>2</sub>), 2.47 (ddd,  $J$  = 17.0, 9.5, 5.5 Hz, 1H, one of CH<sub>A</sub>H<sub>B</sub>C(=O)), 2.30 (ddd,  $J$  = 17.0, 6.5, 5.5 Hz, 1H, one of CH<sub>A</sub>H<sub>B</sub>C(=O)), 2.14 – 2.02 (m, 2H, CH<sub>2</sub>CH<sub>2</sub>C(=O)), 2.01 – 1.97 (m, 3H, CH<sub>3</sub>C=CHC(=O)), 1.75 (s, 3H, one of C(CH<sub>3</sub>)<sub>A</sub>(CH<sub>3</sub>)<sub>B</sub>), 1.67 (s, 3H, one of C(CH<sub>3</sub>)<sub>A</sub>(CH<sub>3</sub>)<sub>B</sub>).

**<sup>13</sup>C NMR** (126 MHz, CDCl<sub>3</sub>)  $\delta$ (ppm): 199.6 (C=O), 162.7 (C=CHC(=O)), 137.5 (C(CH<sub>3</sub>)<sub>2</sub>), 128.3 (C=CHC(=O)), 120.9 (CH=C(CH<sub>3</sub>)<sub>2</sub>), 70.2 (CH<sub>2</sub>OCH<sub>2</sub>CH=C), 67.8 (CH<sub>2</sub>OCH<sub>2</sub>CH=C), 40.5 (CH<sub>2</sub>CHCCH<sub>3</sub>), 34.6 (CH<sub>2</sub>CH<sub>2</sub>C(=O)), 25.9 (one of C(CH<sub>3</sub>)<sub>A</sub>(CH<sub>3</sub>)<sub>B</sub>), 25.7 (CH<sub>2</sub>CH<sub>2</sub>C(=O)), 23.2 (CH<sub>3</sub>C=CHC(=O)), 18.2 (one of C(CH<sub>3</sub>)<sub>A</sub>(CH<sub>3</sub>)<sub>B</sub>).

**HRMS** (ES<sup>+</sup>) exact mass calculated for [M+H]<sup>+</sup> (C<sub>13</sub>H<sub>21</sub>O<sub>2</sub>)<sup>+</sup> requires  $m/z$  209.1536, found  $m/z$  209.1538.

**IR** (film)  $\nu_{\max}$ /cm<sup>-1</sup>: 2970, 2914, 2865, (C-H), 1667 (C=O), 1625 (C=C), 1089 (C-O).

$[\alpha]_D^{25}$  = -74.0 ( $c$  0.115, CHCl<sub>3</sub>).

**(S)-3-methyl-4-((prop-2-yn-1-yloxy)methyl)cyclohex-2-en-1-one (2e)**

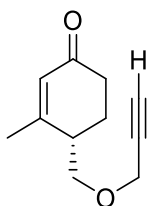

The title compound was prepared according to general procedure **E** from 3-methyl-4-((prop-2-yn-1-yloxy)methyl)cyclohex-3-en-1-one (**1e**) (23.2 mg, 0.130 mmol). The crude reaction mixture was transferred directly onto silica and purified by silica gel column chromatography (pentane/Et<sub>2</sub>O = 8/2) to provide the title compound as a colourless oil in 96% yield (22.2 mg) and 99% ee. [determined by HPLC chiralpak AS-H, hexane/isopropanol = 70/30, 1 ml/min,  $\lambda$  = 230 nm, t(minor) = 25.83 min, t(major) = 27.16 min].

**<sup>1</sup>H NMR** (400 MHz, Benzene-*d*<sub>6</sub>)  $\delta$ (ppm): 5.91 – 5.86 (m, 1H, CHC(=O)), 3.72 (dd,  $J$  = 16.0, 2.5 Hz, 1H, CH<sub>A</sub>H<sub>B</sub>C≡CH), 3.67 (dd,  $J$  = 16.0, 2.5 Hz, 1H, CH<sub>A</sub>H<sub>B</sub>C≡CH), 3.16 (dd,  $J$  = 9.0, 7.0 Hz, 1H, one of COCH<sub>A</sub>H<sub>B</sub>CHCH<sub>2</sub>CH<sub>2</sub>), 3.09 (dd,  $J$  = 9.0, 4.5 Hz, 1H, one of COCH<sub>A</sub>H<sub>B</sub>CHCH<sub>2</sub>CH<sub>2</sub>), 2.30 (ddd,  $J$  = 17.0, 10.0, 5.0 Hz, 1H, one of CH<sub>A</sub>H<sub>B</sub>C(=O)), 2.08 (ddd,  $J$  = 17.0, 7.5, 5.0 Hz, 1H, one of CH<sub>A</sub>H<sub>B</sub>C(=O)), 2.03 (t,  $J$  = 2.5 Hz, 1H, C≡CH), 1.96 (p,  $J$  = 6.0 Hz, 1H, CHCH<sub>2</sub>CH<sub>2</sub>), 1.81 – 1.70 (m, 1H, one of CH<sub>A</sub>H<sub>B</sub>CH<sub>2</sub>C(=O)), 1.62 – 1.52 (m, 1H, one of CH<sub>A</sub>H<sub>B</sub>CH<sub>2</sub>C(=O)), 1.47 (dd,  $J$  = 1.5, 1.0 Hz, 3H, CH<sub>3</sub>).

**<sup>13</sup>C NMR** (101 MHz, Benzene-*d*<sub>6</sub>)  $\delta$ (ppm): 197.0 (C=O), 160.0 (CCH<sub>3</sub>), 128.7 (CHC(=O)), 79.9 (C≡CH), 74.8 (C≡CH), 70.1 (OCH<sub>2</sub>CHCH<sub>2</sub>), 58.2 (CH<sub>2</sub>C≡CH), 40.1 (CHCH<sub>2</sub>CO), 34.9 (CH<sub>2</sub>C(=O)), 25.8 (CH<sub>2</sub>CH<sub>2</sub>C(=O)), 22.5 (CH<sub>3</sub>).

**IR** (film)  $\nu_{\text{max}}$ /cm<sup>-1</sup>: 3248 (C≡C-H), 2916, 2869 (C-H), 2113 (C≡C), 1664 (C=O), 1625 (C=C), 1204 (C-O).

**HRMS** (ES<sup>+</sup>) exact mass calculated for [M+H]<sup>+</sup> (C<sub>11</sub>H<sub>15</sub>O<sub>2</sub>)<sup>+</sup> requires  $m/z$  179.1067, found  $m/z$  179.1067.

**$[\alpha]_D^{25}$**  = -121.9 (*c* 0.130, CHCl<sub>3</sub>).

**(S)-4-(((tert-butyldimethylsilyl)oxy)methyl)-3-methylcyclohex-2-en-1-one (2f)**

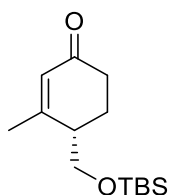

The title compound was prepared according to general procedure **E** from 4-(((tert-butyldimethylsilyl)oxy)methyl)-3-methylcyclohex-3-en-1-one (**1f**) (1.50 g, 5.90 mmol). The crude reaction mixture was flushed through a silica plug (Et<sub>2</sub>O), concentrated *in vacuo* and then purified by silica gel column chromatography (pentane/Et<sub>2</sub>O = 9/1) to provide the title compound as a colourless oil in 90% yield (1.35 g) and 99% ee. [determined by HPLC chiralpak AS-H, hexane/isopropanol = 90/10 to 70/30, 1 ml/min, λ = 230 nm, t(major) = 8.39 min, t(minor) = 11.86 min].

**<sup>1</sup>H NMR** (500 MHz, Acetone-*d*<sub>6</sub>) δ(ppm): 5.80 – 5.79 (m, 1H, C=CH), 3.89 (dd, *J* = 10.0, 6.0 Hz, 1H, CH<sub>A</sub>H<sub>B</sub>O), 3.85 (dd, *J* = 10.0, 4.0 Hz, 1H, CH<sub>A</sub>H<sub>B</sub>O), 2.49 (p, *J* = 5.5 Hz, 1H, CHCH<sub>2</sub>O), 2.43 (ddd, *J* = 17.0, 9.5, 5.5 Hz, 1H, one of CH<sub>A</sub>H<sub>B</sub>C(=O)), 2.20 (ddd, *J* = 17.0, 7.0, 5.5 Hz, 1H, one of CH<sub>A</sub>H<sub>B</sub>C(=O)), 2.13 – 2.02 (m, 2H, CH<sub>2</sub>CH<sub>2</sub>C(=O)), 2.02 – 1.99 (m, 3H, C=CCH<sub>3</sub>), 0.90 (s, 9H, C(CH<sub>3</sub>)<sub>3</sub>), 0.09 (2 x s, 6H, Si(CH<sub>3</sub>)<sub>A</sub>(CH<sub>3</sub>)<sub>B</sub>).

**<sup>13</sup>C NMR** (126 MHz, Acetone-*d*<sub>6</sub>) δ(ppm): 198.3 (C=O), 162.7 (C=CCH<sub>3</sub>), 128.6 (C=CCH<sub>3</sub>), 64.4 (CH<sub>2</sub>O), 43.0 (CHCH<sub>2</sub>O), 35.3 (CH<sub>2</sub>C(=O)), 26.4 (CH<sub>2</sub>CH<sub>2</sub>C(=O)), 26.2 (C(CH<sub>3</sub>)<sub>3</sub>), 22.9 (C=CCH<sub>3</sub>), 18.8 (C(CH<sub>3</sub>)<sub>3</sub>), -5.4 (one of Si(CH<sub>3</sub>)<sub>A</sub>(CH<sub>3</sub>)<sub>B</sub>), -5.4 (one of Si(CH<sub>3</sub>)<sub>A</sub>(CH<sub>3</sub>)<sub>B</sub>).

**HRMS** (ES+) exact mass calculated for [M+H]<sup>+</sup> (C<sub>14</sub>H<sub>27</sub>O<sub>2</sub>Si)<sup>+</sup> requires *m/z* 255.1775, found *m/z* 255.1775.

**IR** (film) ν<sub>max</sub>/cm<sup>-1</sup>: 2953, 2929, 2857 (C-H), 1670 (C=O), 1626 (C=C), 1102 (C-O).<sup>37</sup>

[α]<sub>D</sub><sup>25</sup> = -94.0 (*c* 0.205, CHCl<sub>3</sub>).



**(S)-4-(hydroxymethyl)-3-methylcyclohex-2-en-1-one (2g)**

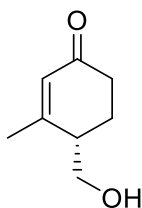

The title compound was prepared according to general procedure **E** from 4-(hydroxymethyl)-3-methylcyclohex-3-en-1-one (**1g**) (9.00 mg, 0.065 mmol). The crude reaction mixture was transferred directly onto silica and purified by silica gel column chromatography (Et<sub>2</sub>O) to provide the title compound as a yellow oil in 67% yield (6.0 mg) and 85% ee. [determined by HPLC chiralpak AS-H, hexane/isopropanol = 70/30, 1 ml/min, λ = 230 nm, t(minor) = 12.56 min, t(major) = 15.93 min].

**<sup>1</sup>H NMR** (400 MHz, CDCl<sub>3</sub>) δ(ppm): 5.93 – 5.90 (m, 1H, CHC(=O)), 3.87 – 3.75 (m, 2H, CH<sub>2</sub>OH), 2.57 – 2.42 (m, 2H, one of CH<sub>A</sub>H<sub>B</sub>C(=O) and CHCH<sub>2</sub>OH), 2.37 – 2.27 (m, 1H, one of CH<sub>A</sub>H<sub>B</sub>C(=O)), 2.17 – 2.04 (m, 3H, CH<sub>2</sub>CH<sub>2</sub>C(=O) and OH), 2.01 (s, 3H, CH<sub>3</sub>).

**<sup>13</sup>C NMR** (101 MHz, CDCl<sub>3</sub>) δ(ppm): 199.5 (C=O), 162.2 (CCH<sub>3</sub>), 128.7 (C=CCH<sub>3</sub>), 63.3 (CH<sub>2</sub>OH), 42.4 (CHCH<sub>2</sub>OH), 34.5 (CH<sub>2</sub>CH<sub>2</sub>C(=O)), 25.2 (CH<sub>2</sub>CH<sub>2</sub>C(=O)), 23.2 (CH<sub>3</sub>).

**IR** (film) ν<sub>max</sub>/cm<sup>-1</sup>: 3406 (O-H), 2980, 2885 (C-H), 1649 (C=O), 1074 (C-O).

**HRMS** (ES+) exact mass calculated for [M+H]<sup>+</sup> (C<sub>8</sub>H<sub>13</sub>O<sub>2</sub>)<sup>+</sup> requires *m/z* 141.0910, found *m/z* 141.0910.

Data is consistent with that published in the literature.<sup>9</sup>

[α]<sub>D</sub><sup>25</sup> = -37.6 (c 1.005, CHCl<sub>3</sub>). (96% ee)

**(S)-4-((benzyloxy)methyl)cyclohex-2-en-1-one (2h)**

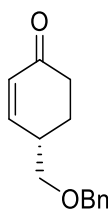

The title compound was prepared according to general procedure **E** from 4-((benzyloxy)methyl)cyclohex-3-en-1-one (**1h**) (28.1 mg, 0.130 mmol) at 30 °C. The crude reaction mixture was transferred directly onto silica and purified by silica gel column chromatography (pentane/Et<sub>2</sub>O = 8/2). Mixed fractions were re-purified by silica gel column chromatography (pentane/Et<sub>2</sub>O = 9/1) three times to provide the title compound as a colourless oil in 62% yield (17.5 mg) and 94% ee. [determined by HPLC chiralpak AS-H, hexane/isopropanol = 70/30, 1 ml/min, λ = 230 nm, t(minor) = 16.47 min, t(major) = 47.98 min].

<sup>1</sup>H NMR (400 MHz, CDCl<sub>3</sub>) δ(ppm): 7.41 – 7.28 (m, 5H, ArH), 6.95 (ddd, *J* = 10.0, 2.5, 1.5 Hz, 1H, CHCHC(=O)), 6.04 (ddd, *J* = 10.0, 2.5, 1.0 Hz, 1H, CHCHC(=O)), 4.55 (s, 2H, CH<sub>2</sub>Ph), 3.51 (dd, *J* = 9.0, 6.5 Hz, 1H, CH<sub>A</sub>H<sub>B</sub>OCH<sub>2</sub>Ph), 3.47 (dd, *J* = 9.0, 7.0 Hz, 1H, CH<sub>A</sub>H<sub>B</sub>OCH<sub>2</sub>Ph), 2.80 – 2.68 (m, 1H, CHCH<sub>2</sub>O), 2.57 – 2.47 (m, 1H, one of CH<sub>A</sub>H<sub>B</sub>C(=O)), 2.44 – 2.33 (m, 1H, one of CH<sub>A</sub>H<sub>B</sub>C(=O)), 2.18 – 2.06 (m, 1.5 Hz, 1H, one of CH<sub>A</sub>H<sub>B</sub>CH<sub>2</sub>C(=O)), 1.89 – 1.74 (m, 1H one of CH<sub>A</sub>H<sub>B</sub>CH<sub>2</sub>C(=O)).

<sup>13</sup>C NMR (101 MHz, CDCl<sub>3</sub>) δ(ppm): 199.7 (C=O), 151.7 (CHCHC(=O)), 138.1 (ArC), 130.2 (CHCHC(=O)), 128.6 (ArCH), 128.0 (ArCH), 127.8 (ArCH), 73.5 (CH<sub>2</sub>Ph), 72.6 (CH<sub>2</sub>OCH<sub>2</sub>Ph), 37.1 (CHCH<sub>2</sub>O), 36.9 (CH<sub>2</sub>C(=O)), 26.0 (CH<sub>2</sub>CH<sub>2</sub>C(=O)).

[α]<sub>D</sub><sup>25</sup> = -86.5 (*c* 1.75, MeOH); lit: [α]<sub>D</sub><sup>26</sup> = -109.4 (*c* 3.58, MeOH) (S)-4-((benzyloxy)methyl)cyclohex-2-en-1-one.<sup>10a</sup> [α]<sub>D</sub><sup>25</sup> = -124.4 (*c* 1.72, MeOH) (R)-4-((benzyloxy)methyl)cyclohex-2-en-1-one.<sup>10b</sup>

Data is consistent with that published in the literature.<sup>10a-c</sup>

**tert-butyl (S)-((2-methyl-4-oxocyclohex-2-en-1-yl)methyl)(phenyl)carbamate (2i)**

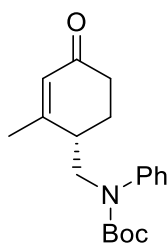

The title compound was prepared according to general procedure **E** from tert-butyl ((2-methyl-4-oxocyclohex-1-en-1-yl)methyl)(phenyl)carbamate (**1i**) (41 mg, 0.13 mmol). The crude reaction mixture was transferred directly onto silica and purified by silica gel column chromatography (pentane/Et<sub>2</sub>O = 6/4) to provide the title compound as a colourless oil in 83% yield (34 mg) and 98% ee. [determined by HPLC chiralpak AD-H, hexane/isopropanol = 90/10, 1 ml/min,  $\lambda$  = 230 nm, t(major) = 6.16 min, t(minor) = 7.32 min].

**<sup>1</sup>H NMR** (500 MHz, Acetone-*d*<sub>6</sub>)  $\delta$ (ppm): 7.43 – 7.37 (m, 2H, ArH), 7.37 – 7.33 (m, 2H, ArH), 7.24 (tt,  $J$  = 7.0, 1.5 Hz, 1H, ArH), 5.77 (s, 1H, CHC(=O)), 4.03 (dd,  $J$  = 14.5, 10.5 Hz, 1H, one of CH<sub>A</sub>H<sub>B</sub>N), 3.83 (dd,  $J$  = 14.5, 4.0 Hz, 1H, one of CH<sub>A</sub>H<sub>B</sub>N), 2.54 – 2.40 (m, 2H, CHCH<sub>2</sub>N and one of CH<sub>A</sub>H<sub>B</sub>C(=O)), 2.11 (dt,  $J$  = 17.5, 4.5 Hz, 1H, one of CH<sub>A</sub>H<sub>B</sub>C(=O)), 2.02 – 1.96 (m, 2H, CH<sub>2</sub>CH<sub>2</sub>C(=O)), 1.90 (d,  $J$  = 1.5 Hz, 3H, C=CCCH<sub>3</sub>), 1.43 (s, 9H, C(CH<sub>3</sub>)<sub>3</sub>).

**<sup>13</sup>C NMR** (126 MHz, Acetone-*d*<sub>6</sub>)  $\delta$ (ppm): 198.0 (C=O), 162.6 (C=CH), 155.3 (NC(=O)), 143.1 (ArC), 129.6 (ArCH), 128.3 (C=CH), 128.0 (ArCH), 126.9 (ArCH), 80.7 (C(CH<sub>3</sub>)<sub>3</sub>), 50.0 (CH<sub>2</sub>N), 39.8 (CHCH<sub>2</sub>N), 33.7 (CH<sub>2</sub>C(=O)), 28.4 (C(CH<sub>3</sub>)<sub>3</sub>), 25.3 (CH<sub>2</sub>CH<sub>2</sub>C(=O)), 22.9 (C=CCCH<sub>3</sub>).

**IR** (film)  $\nu_{\max}/\text{cm}^{-1}$ : 2977 (C-H), 1692, 1667 (C=O), 1153 (C-N).

**HRMS** (ES+) exact mass calculated for [M+Na]<sup>+</sup> (C<sub>19</sub>H<sub>25</sub>NNaO<sub>3</sub>)<sup>+</sup> requires  $m/z$  338.1727, found  $m/z$  338.1726.

$[\alpha]_D^{25}$  = -1.72 (*c* 0.145, CHCl<sub>3</sub>).

**tert-butyl (S)-((2-methyl-4-oxocyclohex-2-en-1-yl)methyl)(prop-2-yn-1-yl)carbamate (2j)**

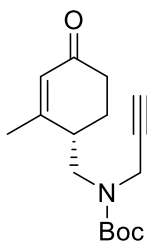

The title compound was prepared according to general procedure **E** from tert-butyl ((2-methyl-4-oxocyclohex-1-en-1-yl)methyl)(prop-2-yn-1-yl)carbamate (**1j**) (36.0 mg, 0.130 mmol) and left for 48 h. The crude reaction mixture was transferred directly onto silica and purified by silica gel column chromatography (pentane/Et<sub>2</sub>O = 6/4) to provide the title compound as an off white solid in 75% yield (27.1 mg) and 96% ee. [determined by HPLC chiralpak AD, hexane/isopropanol = 90/10 to 70/30, 1 ml/min,  $\lambda$  = 240 nm, t(major) = 7.50 min, t(minor) = 8.62 min].

**<sup>1</sup>H NMR** (500 MHz, Toluene-*d*<sub>8</sub>, 363 K)  $\delta$ (ppm): 5.78 (s, 1H, CHC(=O)), 3.94 – 3.73 (m, 2H, CH<sub>2</sub>C≡CH), 3.38 – 3.28 (m, 1H, one of CHCHAHBN), 3.23 (dd, *J* = 14.5, 4.5 Hz, 1H, one of CHCHAHBN), 2.51 – 2.37 (m, 1H, one of CHAHBC(=O)), 2.37 – 2.28 (m, 1H, CHCH<sub>2</sub>N), 2.17 – 2.12 (m, 1H, one of CHAHBC(=O)), 1.88 – 1.81 (m, 1H, C≡CH), 1.78 – 1.67 (m, 2H, CH<sub>2</sub>CH<sub>2</sub>C(=O)), 1.60 (s, 3H, CH<sub>3</sub>C=C), 1.38 (s, 9H, C(CH<sub>3</sub>)<sub>3</sub>).

**<sup>13</sup>C NMR** (126 MHz, Toluene-*d*<sub>8</sub>, 363 K)  $\delta$ (ppm): 195.8 (CHC(=O)), 159.3 (C=CCH<sub>3</sub>), 155.0 (NC(=O)), 128.8 (CHC(=O)), 80.5 (OC(CH<sub>3</sub>)<sub>3</sub>), 79.9 (C≡CH), 72.0 (C≡CH), 47.6 (CHCH<sub>2</sub>N), 39.2 (CHCH<sub>2</sub>N), 37.1 (CH<sub>2</sub>C≡CH), 33.7 (CH<sub>2</sub>CH<sub>2</sub>C(=O)), 28.4 (C(CH<sub>3</sub>)<sub>3</sub>), 25.5 (CH<sub>2</sub>CH<sub>2</sub>C(=O)), 22.3 (C=CCH<sub>3</sub>).

**IR** (powder)  $\nu_{\text{max}}$ /cm<sup>-1</sup>: 3235 (C≡C-H), 2981, 2934, 2892, 2872 (C-H), 2110 (C≡C), 1667 (C=O), 1632 (C=C).

**HRMS** (ES+) exact mass calculated for [M+H]<sup>+</sup> (C<sub>16</sub>H<sub>24</sub>NO<sub>3</sub>)<sup>+</sup> requires *m/z* 278.1751, found *m/z* 278.1752.

**MP**: 74-76 °C.

**$[\alpha]_D^{25}$**  = -103.9 (*c* 0.095, CHCl<sub>3</sub>).

**tert-butyl (S)-(1,3-dioxoisindolin-2-yl)((2-methyl-4-oxocyclohex-2-en-1-yl)methyl)carbamate (2k)**

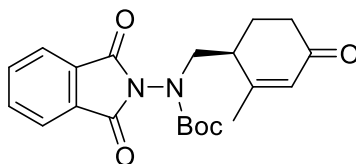

The title compound was prepared according to general procedure **E** from tert-butyl (1,3-dioxoisindolin-2-yl)((2-methyl-4-oxocyclohex-1-en-1-yl)methyl)carbamate (**1k**) (50 mg, 0.13 mmol) and left for 48 h. The crude reaction mixture was transferred directly onto silica and purified by silica gel column chromatography (pentane/EtOAc = 4/6) to provide the title compound as a white solid (foam) in 62% yield (31.1 mg) and 93% ee. [determined by HPLC chiralpak AD, hexane/isopropanol = 90/10 to 70/30, 1 ml/min,  $\lambda = 230$  nm,  $t(\text{minor}) = 11.10$  min,  $t(\text{major}) = 12.97$  min].

**$^1\text{H}$  NMR** (400 MHz, Methanol- $d_4$ )  $\delta$ (ppm): 8.00 – 7.88 (m, 4H, ArH), 5.88 (s, 1H,  $\text{CHC}(=\text{O})$ ), 3.97 (m, 1H, one of  $\text{CH}_A\text{H}_B\text{N}$ , minor and major rotamer), 3.79 – 3.61 (m, 1H, one of  $\text{CH}_A\text{H}_B\text{N}$ , minor and major rotamer), 2.72 – 2.52 (m, 2H,  $\text{CHCH}_2\text{N}$  and one of  $\text{CH}_A\text{H}_B\text{C}(=\text{O})$ ), 2.40 – 2.09 (m, 3H, one of  $\text{CH}_A\text{H}_B\text{C}(=\text{O})$  and  $\text{CH}_2\text{CH}_2\text{C}(=\text{O})$ ), 1.99 (d,  $J = 1.5$  Hz, 3H,  $\text{C}=\text{CCH}_3$ ), 1.54 (s, 3.46:5.45,  $\text{C}(\text{CH}_3)_3$  minor rotamer), 1.30 (s, 3.46:5.47,  $\text{C}(\text{CH}_3)_3$  major rotamer).

**$^{13}\text{C}$  NMR** (101 MHz, Methanol- $d_4$ )  $\delta$ (ppm): 202.0 ( $\text{CHC}(=\text{O})$  major rotamer), 201.6 ( $\text{CHC}(=\text{O})$  minor rotamer), 167.2 ( $\text{ArC}(=\text{O})$  minor rotamer), 166.8 ( $\text{ArC}(=\text{O})$  major rotamer), 165.6 ( $\text{C}=\text{CCH}_3$  major rotamer), 165.3 ( $\text{C}=\text{CCH}_3$  minor rotamer), 155.0 ( $\text{CH}_2\text{NC}(=\text{O})$ ), 136.4 ( $\text{ArCH}$  major rotamer), 136.3 ( $\text{ArCH}$  minor rotamer), 131.2 ( $\text{ArC}$  major rotamer), 131.2 ( $\text{ArC}$  minor rotamer), 128.7 ( $\text{CHC}(=\text{O})$  minor rotamer), 128.6 ( $\text{CHC}(=\text{O})$  major rotamer), 124.9 ( $\text{ArCH}$ ), 85.1 ( $\text{C}(\text{CH}_3)_3$  minor rotamer), 83.8 ( $\text{C}(\text{CH}_3)_3$  major rotamer), 51.9 ( $\text{CH}_2\text{N}$  minor rotamer), 50.5 ( $\text{CH}_2\text{N}$  major rotamer), 40.4 ( $\text{CHCH}_2\text{N}$  minor rotamer), 40.2 ( $\text{CHCH}_2\text{N}$  major rotamer), 34.2 ( $\text{CH}_2\text{C}(=\text{O})$ ), 28.4 ( $\text{C}(\text{CH}_3)_3$  minor rotamer), 28.1 ( $\text{C}(\text{CH}_3)_3$  major rotamer), 25.9 ( $\text{CH}_2\text{CH}_2\text{C}(=\text{O})$  major rotamer), 25.8 ( $\text{CH}_2\text{CH}_2\text{C}(=\text{O})$  minor rotamer), 23.1 ( $\text{C}=\text{CCH}_3$  minor rotamer), 23.0 ( $\text{C}=\text{CCH}_3$  major rotamer).

**IR** (powder)  $\nu_{\text{max}}/\text{cm}^{-1}$ : 2933, 2871 (C-H), 1733, 1665 (C=O).

**HRMS** (ES+) exact mass calculated for  $[\text{M}+\text{Na}]^+$  ( $\text{C}_{21}\text{H}_{24}\text{N}_2\text{NaO}_5$ )<sup>+</sup> requires  $m/z$  407.1577, found  $m/z$  407.1577.

$[\alpha]_D^{25} = +29.5$  ( $c$  0.055,  $\text{CHCl}_3$ ).

tert-butyl

(S)-((tert-butyldimethylsilyl)oxy)((2-methyl-4-oxocyclohex-2-en-1-

yl)methyl)carbamate (2l)

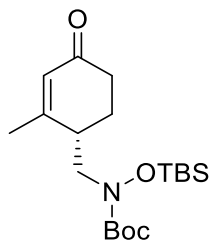

The title compound was prepared according to general procedure E from tert-butyl ((tert-butyldimethylsilyl)oxy)((2-methyl-4-oxocyclohex-1-en-1-yl)methyl)carbamate (**1l**) (48 mg, 0.13 mmol). The crude reaction mixture was transferred directly onto silica and purified by silica gel column chromatography (pentane/Et<sub>2</sub>O = 9/1 to 8/2) to provide the title compound as a colourless oil in 53% yield (25.6 mg) and 94% ee. [determined by HPLC chiralpak AS-H, hexane/isopropanol = 90/10 to 70/30, 1 ml/min,  $\lambda$  = 240 nm, t(major) = 6.82 min, t(minor) = 8.09 min].

**<sup>1</sup>H NMR** (500 MHz, Acetone-*d*<sub>6</sub>)  $\delta$ (ppm): 5.80 (s, 1H,  $\underline{\text{C}}\underline{\text{H}}\underline{\text{C}}(\text{=O})$ ), 3.81 (dd,  $J$  = 14.5, 10.0 Hz, 1H, one of  $\underline{\text{C}}\underline{\text{H}}\underline{\text{A}}\underline{\text{H}}\underline{\text{B}}\underline{\text{N}}$ ), 3.56 (dd,  $J$  = 14.5, 4.0 Hz, 1H, one of  $\underline{\text{C}}\underline{\text{H}}\underline{\text{A}}\underline{\text{H}}\underline{\text{B}}\underline{\text{N}}$ ), 2.94 – 2.87 (m, 1H,  $\underline{\text{C}}\underline{\text{H}}\underline{\text{C}}\underline{\text{H}}\underline{\text{C}}\underline{\text{H}}\underline{\text{N}}$ ), 2.49 (ddd,  $J$  = 17.5, 12.5, 5.5 Hz, 1H, one of  $\underline{\text{C}}\underline{\text{H}}\underline{\text{A}}\underline{\text{H}}\underline{\text{B}}\underline{\text{C}}(\text{=O})$ ), 2.23 – 2.13 (m, 1H, one of  $\underline{\text{C}}\underline{\text{H}}\underline{\text{A}}\underline{\text{H}}\underline{\text{B}}\underline{\text{C}}(\text{=O})$ ), 2.02 (m, 1H, one of  $\underline{\text{C}}\underline{\text{H}}\underline{\text{A}}\underline{\text{H}}\underline{\text{B}}\underline{\text{C}}\underline{\text{H}}\underline{\text{C}}(\text{=O})$ ), 2.00 (d,  $J$  = 1.5 Hz, 3H,  $\underline{\text{C}}\underline{\text{H}}\underline{\text{C}}\underline{\text{H}}\underline{\text{C}}(\text{=C})$ ), 1.99 – 1.93 (m, 1H, one of  $\underline{\text{C}}\underline{\text{H}}\underline{\text{A}}\underline{\text{H}}\underline{\text{B}}\underline{\text{C}}\underline{\text{H}}\underline{\text{C}}(\text{=O})$ ), 1.49 (s, 9H,  $\text{OC}(\underline{\text{C}}\underline{\text{H}}\underline{\text{C}}\underline{\text{H}}\underline{\text{C}})_3$ ), 0.98 (s, 9H,  $\text{SiC}(\underline{\text{C}}\underline{\text{H}}\underline{\text{C}}\underline{\text{H}}\underline{\text{C}})_3$ ), 0.22 (2x s, 3H,  $\text{Si}(\underline{\text{C}}\underline{\text{H}}\underline{\text{C}}\underline{\text{H}}\underline{\text{C}})_\text{A}(\underline{\text{C}}\underline{\text{H}}\underline{\text{C}}\underline{\text{H}}\underline{\text{C}})_\text{B}$ ), 0.22 (2x s, 3H,  $\text{Si}(\underline{\text{C}}\underline{\text{H}}\underline{\text{C}}\underline{\text{H}}\underline{\text{C}})_\text{A}(\underline{\text{C}}\underline{\text{H}}\underline{\text{C}}\underline{\text{H}}\underline{\text{C}})_\text{B}$ ).

**<sup>13</sup>C NMR** (126 MHz, Acetone-*d*<sub>6</sub>)  $\delta$ (ppm): 198.0 ( $\underline{\text{C}}\underline{\text{H}}\underline{\text{C}}(\text{=O})$ ), 162.7 ( $\underline{\text{C}}=\underline{\text{C}}\underline{\text{H}}\underline{\text{C}}$ ), 157.9 ( $\underline{\text{N}}\underline{\text{C}}(\text{=O})$ ), 128.4 ( $\underline{\text{C}}=\underline{\text{C}}\underline{\text{H}}$ ), 81.8 ( $\text{OC}(\underline{\text{C}}\underline{\text{H}}\underline{\text{C}}\underline{\text{H}}\underline{\text{C}})_3$ ), 52.2 ( $\underline{\text{C}}\underline{\text{H}}\underline{\text{C}}\underline{\text{H}}\underline{\text{N}}$ ), 38.2 ( $\underline{\text{C}}\underline{\text{H}}\underline{\text{C}}\underline{\text{H}}\underline{\text{C}}\underline{\text{H}}\underline{\text{N}}$ ), 33.7 ( $\underline{\text{C}}\underline{\text{H}}\underline{\text{C}}\underline{\text{H}}\underline{\text{C}}(\text{=O})$ ), 28.4 ( $\text{OC}(\underline{\text{C}}\underline{\text{H}}\underline{\text{C}}\underline{\text{H}}\underline{\text{C}})_3$ ), 26.2 ( $\text{SiC}(\underline{\text{C}}\underline{\text{H}}\underline{\text{C}}\underline{\text{H}}\underline{\text{C}})_3$ ), 25.5 ( $\underline{\text{C}}\underline{\text{H}}\underline{\text{C}}\underline{\text{H}}\underline{\text{C}}\underline{\text{H}}\underline{\text{C}}\underline{\text{H}}\underline{\text{N}}$ ), 23.1 ( $\underline{\text{C}}=\underline{\text{C}}\underline{\text{H}}\underline{\text{C}}$ ), 18.4 ( $\text{SiC}(\underline{\text{C}}\underline{\text{H}}\underline{\text{C}}\underline{\text{H}}\underline{\text{C}})_3$ ), -4.8 (one of  $\text{Si}(\underline{\text{C}}\underline{\text{H}}\underline{\text{C}}\underline{\text{H}}\underline{\text{C}})_\text{A}(\underline{\text{C}}\underline{\text{H}}\underline{\text{C}}\underline{\text{H}}\underline{\text{C}})_\text{B}$ ), -4.8 (one of  $\text{Si}(\underline{\text{C}}\underline{\text{H}}\underline{\text{C}}\underline{\text{H}}\underline{\text{C}})_\text{A}(\underline{\text{C}}\underline{\text{H}}\underline{\text{C}}\underline{\text{H}}\underline{\text{C}})_\text{B}$ ).

**HRMS** (ES<sup>+</sup>) exact mass calculated for  $[\text{M}+\text{Na}]^+$  ( $\text{C}_{19}\text{H}_{35}\text{NNaO}_4\text{Si}$ )<sup>+</sup> requires  $m/z$  392.2228, found  $m/z$  392.2227.

**IR** (film)  $\nu_{\text{max}}/\text{cm}^{-1}$ : 2955, 2931, 2859 (C-H), 1696 (ketone C=O), 1673 (boc C=O), 1630 (C=C), 1156 (C-N).

$[\alpha]_D^{25} = -42.6$  ( $c$  0.08,  $\text{CHCl}_3$ ).

**(S)-4-((1H-indol-1-yl)methyl)-3-methylcyclohex-2-en-1-one (2m)**

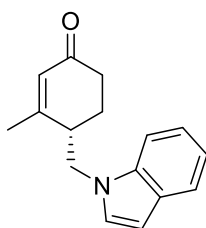

The title compound was prepared according to general procedure E from 4-((1H-indol-1-yl)methyl)-3-methylcyclohex-3-en-1-one (**1m**) (31.4 mg, 0.130 mmol). The crude reaction mixture was transferred directly onto silica and purified by silica gel column chromatography (pentane/Et<sub>2</sub>O = 7/3) to provide the title compound as a yellow amorphous solid in 81% yield (25.3 mg) and 90% ee. [determined by HPLC chiralpak AD-H, hexane/isopropanol = 95/5, 1 ml/min,  $\lambda$  = 230 nm, t(major) = 8.92 min, t(minor) = 10.08 min].

**<sup>1</sup>H NMR** (500 MHz, CDCl<sub>3</sub>)  $\delta$ (ppm): 7.69 (d,  $J$  = 8.0 Hz, 1H, ArH), 7.37 (d,  $J$  = 8.0 Hz, 1H, ArH), 7.27 (m, 1H, ArH), 7.19 – 7.14 (m, 1H, ArH), 7.10 (d,  $J$  = 3.0 Hz, 1H, ArH), 6.57 (d,  $J$  = 3.0 Hz, 1H, ArH), 6.00 (s, 1H, CH(C=O)), 4.49 (dd,  $J$  = 14.5, 5.5 Hz, 1H, one of CH<sub>A</sub>H<sub>B</sub>N), 4.15 (dd,  $J$  = 14.5, 10.0 Hz, 1H, one of CH<sub>A</sub>H<sub>B</sub>N), 2.96 – 2.89 (m, 1H, CHCH<sub>2</sub>N), 2.50 (ddd,  $J$  = 17.5, 12.0, 5.0 Hz, 1H, one of CH<sub>A</sub>H<sub>B</sub>C(=O)), 2.33 (dt,  $J$  = 17.0, 5.0 Hz, 1H, one of CH<sub>A</sub>H<sub>B</sub>C(=O)), 2.01 (s, 3H, CH<sub>3</sub>), 1.99 – 1.89 (m, 1H, one of CH<sub>A</sub>H<sub>B</sub>CH<sub>2</sub>C(=O)), 1.81 – 1.72 (m, 1H, one of CH<sub>A</sub>H<sub>B</sub>CH<sub>2</sub>C(=O));

**<sup>13</sup>C NMR** (126 MHz, CDCl<sub>3</sub>)  $\delta$ (ppm): 198.4 (C=O), 161.5 (CCH<sub>3</sub>), 135.9 (ArC), 128.8 (ArC), 128.5 (CHC(=O)), 127.9 (ArCH), 122.0 (ArCH), 121.4 (ArCH), 119.8 (ArCH), 109.1 (ArCH), 102.1 (ArCH), 47.3 (CH<sub>2</sub>N), 40.3 (CHCH<sub>2</sub>N), 33.1 (CH<sub>2</sub>C(=O)), 25.3 (CH<sub>2</sub>CH<sub>2</sub>C(=O)), 23.2 (CH<sub>3</sub>);

**HRMS** (ES+) exact mass calculated for [M+H]<sup>+</sup> (C<sub>16</sub>H<sub>18</sub>NO)<sup>+</sup> requires  $m/z$  240.1383, found  $m/z$  240.1386.

**IR** (film)  $\nu_{\max}$ /cm<sup>-1</sup>: 3051, 2944 (C-H), 1664 (C=O), 1626 (C=C).

$[\alpha]_D^{25}$  = -34.9 ( $c$  0.16, CHCl<sub>3</sub>).

**tert-butyl (S)-furan-2-yl((2-methyl-4-oxocyclohex-2-en-1-yl)methyl)carbamate (2n)**

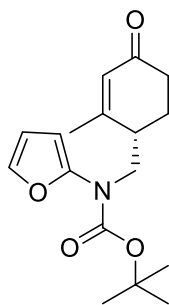

The title compound was prepared according to general procedure **E** from tert-butyl furan-2-yl((2-methyl-4-oxocyclohex-1-en-1-yl)methyl)carbamate (**1n**) (39.7 mg, 0.130 mmol). The crude reaction mixture was transferred directly onto silica and purified by silica gel column chromatography (pentane/Et<sub>2</sub>O = 8/2) to provide the title compound as an off white solid in quantitative yield (39.7 mg) and 99% ee. [determined by HPLC chiralpak AD-H, hexane/isopropanol = 90/10, 1 ml/min,  $\lambda$  = 230 nm, t (major) = 5.62 min, t (minor) = 6.33 min].

**<sup>1</sup>H NMR** (400 MHz, CDCl<sub>3</sub>)  $\delta$ (ppm): 7.18 (dd,  $J$  = 2.0, 1.0 Hz, 1H, NCCHCHCHO), 6.35 (dd,  $J$  = 3.5, 2.0 Hz, 1H, NCCHCHCHO), 6.03 (bs, 1H, NCCHCHCHO), 5.86 (s, 1H, C=CHC(=O)), 3.81 – 3.69 (m, 2H, CH<sub>2</sub>N), 2.61 – 2.54 (m, 1H, CHCH<sub>2</sub>N), 2.48 (ddd,  $J$  = 17.5, 11.5, 6.0 Hz, 1H, one of CH<sub>A</sub>H<sub>B</sub>C(=O)), 2.54 – 2.42 (m, 1H, one of CH<sub>A</sub>H<sub>B</sub>C(=O)), 2.08 – 1.96 (m, 2H, CH<sub>2</sub>CH<sub>2</sub>C(=O)), 1.94 (d,  $J$  = 1.5 Hz, 3H, CH<sub>3</sub>C=C), 1.45 (s, 9H, C(CH<sub>3</sub>)<sub>3</sub>).

**<sup>13</sup>C NMR** (101 MHz, CDCl<sub>3</sub>)  $\delta$ (ppm): 199.1 (CH<sub>2</sub>C(=O)), 162.1 (CH<sub>3</sub>C=C), 153.9 (NC(=O)), 148.3 (NCCHCHCHO), 138.3 (NCCHCHCHO), 128.2 (CH<sub>3</sub>C=CH), 111.2 (NCCHCHCHO), 101.3 (NCCHCHCHO), 81.9 (OC(CH<sub>3</sub>)<sub>3</sub>), 48.6 (CH<sub>2</sub>N), 39.4 (CHCH<sub>2</sub>N), 33.3 (CH<sub>2</sub>C(=O)), 28.3 (OC(CH<sub>3</sub>)<sub>3</sub>), 24.7 (CH<sub>2</sub>CH<sub>2</sub>C(=O)), 23.0 (CH<sub>3</sub>C=C).

**HRMS** (ESI+) exact mass calculated for [M+Na]<sup>+</sup> (C<sub>17</sub>H<sub>23</sub>NNaO<sub>4</sub>)<sup>+</sup> requires  $m/z$  328.1519, found  $m/z$  328.1519.

**IR** (film)  $\nu_{\max}/\text{cm}^{-1}$ : 2921 (C-H), 1712 (C=O ester), 1670 (C=O ketone), 1157 (C-O).

**MP**: 42-45 °C.

$[\alpha]_D^{25} = -39.2$  ( $c$  0.50, CHCl<sub>3</sub>).



**benzyl (S)-furan-2-yl((2-methyl-4-oxocyclohex-2-en-1-yl)methyl)carbamate (2o)**

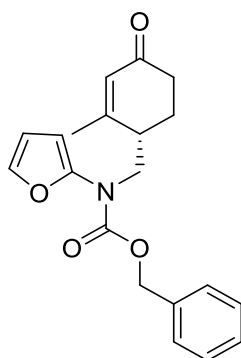

The title compound was prepared according to general procedure **E** from benzyl furan-2-yl((2-methyl-4-oxocyclohex-1-en-1-yl)methyl)carbamate (**1o**) (44.1 mg, 0.130 mmol). The crude reaction mixture was transferred directly onto silica and purified by silica gel column chromatography (pentane/Et<sub>2</sub>O = 7/3) to provide the title compound as colourless oil in 80% yield (35.3 mg) and 97% ee. [determined by HPLC chiralpak IA, hexane/isopropanol = 90/10, 1 ml/min,  $\lambda$  = 230 nm, t (major) = 16.47 min, t (minor) = 20.68 min].

**<sup>1</sup>H NMR** (400 MHz, CDCl<sub>3</sub>)  $\delta$ (ppm): 7.46 – 7.15 (m, 6H, ArCH and NCCHCHCHO), 6.39 (dd,  $J$  = 3.5, 2.0 Hz, 1H, NCCHCHCHO), 6.09 (bs, 1H, NCCHCHCHO), 5.86 (s, 1H, CH<sub>3</sub>C=CH), 5.19 (s, 2H, CH<sub>2</sub>O), 3.93 – 3.64 (m, 2H, CH<sub>2</sub>O), 2.64 – 2.53 (m, 1H, CHCH<sub>2</sub>N), 2.46 (bs, 1H, one of CH<sub>A</sub>H<sub>B</sub>C(=O)), 2.32 – 2.14 (bm, 1H, one of CH<sub>A</sub>H<sub>B</sub>C(=O)), 2.13 – 1.95 (bm, 2H, CH<sub>2</sub>CH<sub>2</sub>C(=O)), 1.91 (bs, 3H, CH<sub>3</sub>).

**<sup>13</sup>C NMR** (101 MHz, CDCl<sub>3</sub>)  $\delta$ (ppm): 199.0 (CH<sub>2</sub>C=O), 161.7 (CH<sub>3</sub>C=C), 155.1 (NC(=O)), 147.5 (NCCHCHCHO), 139.1 (NCCHCHCHO), 135.9 (ArC), 128.6 (CH<sub>3</sub>C=CH), 128.4 (ArCH (may be two under this peak)), 127.6 (ArCH), 111.4 (NCCHCHCHO), 102.7 (NCCHCHCHO), 68.1 (OCH<sub>2</sub>), 49.4 (CH<sub>2</sub>N), 39.2 (CHCH<sub>2</sub>N), 33.2 (CH<sub>2</sub>C(=O)), 24.6 (CH<sub>2</sub>CH<sub>2</sub>C(=O)), 22.9 (CH<sub>3</sub>).

**IR** (film)  $\nu_{\max}$ /cm<sup>-1</sup>: 2922 (C-H), 1718 (C=O ester/amide), 1669 (C=O ketone), 1281, 1167 (C-O).

**HRMS** (ES<sup>+</sup>) exact mass calculated for [M+Na]<sup>+</sup> (C<sub>20</sub>H<sub>21</sub>NNaO<sub>4</sub>)<sup>+</sup> requires  $m/z$  362.1363, found  $m/z$  362.1363.

$[\alpha]_D^{25}$  = -20.8 ( $c$  0.49, CHCl<sub>3</sub>).

**(R)-5',6'-dihydro-[1,1':2',1''-terphenyl]-4'(1'H)-one (2p)**

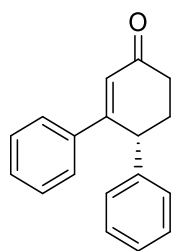

The title compound was prepared according to general procedure **E** from 5',6'-dihydro-[1,1':2',1''-terphenyl]-4'(3'H)-one (**1p**) (16.1 mg, 0.0650 mmol). The crude reaction mixture was transferred directly onto silica and purified by silica gel column chromatography (pentane/Et<sub>2</sub>O = 9/1) to provide the title compound as a yellow solid in 76% yield (12.3 mg) and 94% ee. [determined by HPLC chiralpak OD-H, hexane/isopropanol = 90/10, 1 ml/min, λ = 230 nm, t(minor) = 9.40 min, t(major) = 13.19 min].

**<sup>1</sup>H NMR** (500 MHz, CDCl<sub>3</sub>) δ(ppm): 7.48 – 7.43 (m, 2H, ArH), 7.35 – 7.21 (m, 8H, ArH), 6.70 (s, 1H, CHC(=O)), 4.31 (dd, *J* = 5.0, 3.0 Hz, 1H, CHPh), 2.57 (dddd, *J* = 13.0, 12.0, 6.0, 5.0 Hz, 1H, one of CH<sub>A</sub>H<sub>B</sub>CH<sub>2</sub>C(=O)), 2.44 – 2.31 (m, 2H, CH<sub>2</sub>CH<sub>2</sub>C(=O)), 2.24 – 2.18 (m, 1H, one of CH<sub>A</sub>H<sub>B</sub>CH<sub>2</sub>C(=O)).

**<sup>13</sup>C NMR** (126 MHz, CDCl<sub>3</sub>) δ(ppm): 200.1 (C=O), 159.6 (ArC), 140.3 (ArC), 138.0 (C=CH), 130.0 (ArCH), 129.0 (ArCH), 128.9 (ArCH), 128.2 (ArCH), 127.2 (ArCH), 127.1 (ArCH), 127.0 (C=CH), 43.3 (CHPh), 32.9 (CH<sub>2</sub>C(=O)), 32.1 (CH<sub>2</sub>CH<sub>2</sub>C(=O)).

[α]<sub>D</sub><sup>25</sup> = -237.9 (*c* 0.55, CHCl<sub>3</sub>).

Data is consistent with that published in the literature.<sup>7</sup>

**(S)-3,4-diethylcyclohex-2-en-1-one (2q)**

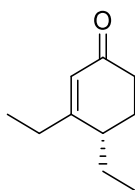

The title compound was prepared according to general procedure **F** from 3,4-diethylcyclohex-3-en-1-one (**1q**) (9.9 mg, 0.0650 mmol) using Et<sub>2</sub>O (0.43 ml). The crude reaction mixture was concentrated under a stream of nitrogen and transferred directly onto silica then purified by silica gel column chromatography (pentane/Et<sub>2</sub>O = 85/15) to provide the title compound as a yellow oil in 63% yield (6.2 mg) and 97% ee.\* [determined by HPLC chiralpak AS-H, hexane/isopropanol = 70/30, 1 ml/min, λ = 240 nm, t(minor) = 19.23 min, t(major) = 28.23 min].

\*Care should be taken when removing solvent from this compound as it appears to be slightly volatile.

**<sup>1</sup>H NMR** (400 MHz, CDCl<sub>3</sub>) δ(ppm): 5.83 (s, 1H, C=CH), 2.45 (ddd, *J* = 17.0, 11.5, 5.5 Hz, 1H, one of CH<sub>A</sub>H<sub>B</sub>C(=O)), 2.38 – 2.14 (m, 4H, one of CH<sub>A</sub>H<sub>B</sub>C(=O), CHCH<sub>2</sub> and CH<sub>2</sub>C=C), 2.09 – 1.90 (m, 2H, CH<sub>2</sub>CH<sub>2</sub>C(=O)), 1.67 (dddd, *J* = 14.0, 11.5, 7.5, 3.5 Hz, 1H, one of CHCH<sub>A</sub>CH<sub>B</sub>CH<sub>3</sub>), 1.54 – 1.39 (m, 1H, one of CHCH<sub>A</sub>CH<sub>B</sub>CH<sub>3</sub>), 1.10 (t, *J* = 7.5 Hz, 3H, CH<sub>3</sub>CH<sub>2</sub>C=C), 1.01 (t, *J* = 7.5 Hz, 3H, CH<sub>3</sub>CH<sub>2</sub>CH).

**<sup>13</sup>C NMR** (126 MHz, CDCl<sub>3</sub>) δ(ppm): 200.0 (C=O), 171.7 (C=CH), 124.3 (C=CH), 40.1 (CHC=C), 33.8 (CH<sub>2</sub>C(=O)), 28.8 (CH<sub>2</sub>C=C), 25.7 (CH<sub>2</sub>CH<sub>2</sub>C(=O)), 24.1 (CH<sub>3</sub>CH<sub>2</sub>CH), 12.7 (CH<sub>3</sub>CH<sub>2</sub>CH), 11.7 (CH<sub>3</sub>CH<sub>2</sub>C=C).

**IR** (film) ν<sub>max</sub>/cm<sup>-1</sup>: 2965, 2931, 2876 (C-H), 1671 (C=O).

**HRMS** (ES+) exact mass calculated for [M+H]<sup>+</sup> (C<sub>10</sub>H<sub>17</sub>O)<sup>+</sup> requires *m/z* 153.1274, found *m/z* 153.1273.

[α]<sub>D</sub><sup>25</sup> = -78.4 (*c* 0.54, CHCl<sub>3</sub>).

**(S)-3,4-dipropylcyclohex-2-en-1-one (2r)**

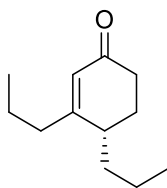

The title compound was prepared according to general procedure **F** from 3,4-dipropylcyclohex-3-en-1-one (**1r**) (11.7 mg, 0.0650 mmol). The crude reaction mixture was transferred directly onto silica and purified by silica gel column chromatography (pentane/Et<sub>2</sub>O = 95/5) to provide the title compound as a yellow oil in 50% yield (5.8 mg) and 97% ee. [determined by HPLC chiralpak AS-H, hexane/isopropanol = 90/10 to 70/30, 1 ml/min,  $\lambda$  = 240 nm, t(minor) = 20.13 min, t(major) = 31.25 min].

**<sup>1</sup>H NMR** (500 MHz, CDCl<sub>3</sub>)  $\delta$ (ppm): 5.81 (s, 1H, C=CH), 2.45 (ddd,  $J$  = 17.5, 12.0, 5.0 Hz, 1H, one of CH<sub>A</sub>H<sub>B</sub>C(=O)), 2.32 – 2.12 (m, 4H, one of CH<sub>A</sub>H<sub>B</sub>C(=O), CHCH<sub>2</sub> and CH<sub>2</sub>C=C), 2.06 – 1.97 (m, 1H, one of CH<sub>A</sub>H<sub>B</sub>CH<sub>2</sub>C(=O)), 1.96 – 1.89 (m, 1H, one of CH<sub>A</sub>H<sub>B</sub>CH<sub>2</sub>C(=O)), 1.65 – 1.21 (m, 8H, 2 x CH<sub>2</sub>CH<sub>3</sub> and 2 x CH<sub>3</sub>CH<sub>2</sub>CH<sub>2</sub>CH), 0.98 – 0.91 (m, 6H, 2 x CH<sub>3</sub>).

**<sup>13</sup>C NMR** (126 MHz, CDCl<sub>3</sub>)  $\delta$ (ppm): 200.0 (C=O), 170.5 (C=CH), 125.3 (C=CH), 38.0 (CHCH<sub>2</sub> and CH<sub>2</sub>C=C), 33.6 (CH<sub>2</sub>C(=O)), 33.1 (CH<sub>3</sub>CH<sub>2</sub>CH<sub>2</sub>CH), 26.1 (CH<sub>2</sub>CH<sub>2</sub>C(=O)), 21.3 (CH<sub>3</sub>CH<sub>2</sub>CH<sub>2</sub>CH), 20.6 (CH<sub>3</sub>CH<sub>2</sub>CH<sub>2</sub>C=C), 14.2 (one of CH<sub>3</sub>), 14.0 (one of CH<sub>3</sub>).

**IR** (film)  $\nu_{\text{max}}$ /cm<sup>-1</sup>: 2957, 2930, 2872 (C-H), 1673 (C=O), 1622 (C=C).

**HRMS** (ES<sup>+</sup>) exact mass calculated for [M+H]<sup>+</sup> (C<sub>12</sub>H<sub>21</sub>O)<sup>+</sup> requires  $m/z$  181.1587, found  $m/z$  181.1587.

$[\alpha]_D^{25}$  = -81.9 ( $c$  0.47, CHCl<sub>3</sub>).

**(S)-6-methyl-5,6-dihydro-[1,1'-biphenyl]-3(4H)-one (2s)**

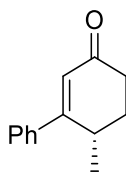

The title compound was prepared according to general procedure **F** from 6-methyl-4,5-dihydro-[1,1'-biphenyl]-3(2H)-one (**1s**) (24.2 mg, 0.130 mmol). The crude reaction mixture was transferred directly onto silica and purified by silica gel column chromatography (pentane/Et<sub>2</sub>O = 9/1) to provide the title compound as an amorphous yellow solid in 63% yield (15.2 mg) and 95% ee. [determined by HPLC chiralpak OD-H, hexane/isopropanol = 85/15, 1 ml/min,  $\lambda$  = 280 nm, t(minor) = 8.50 min, t(major) = 9.71 min].

**<sup>1</sup>H NMR** (500 MHz, CDCl<sub>3</sub>)  $\delta$ (ppm): 7.53 – 7.46 (m, 2H, ArH), 7.41 (m, 3H, ArH), 6.25 (s, 1H, CHC(=O)), 3.16 (ddq,  $J$  = 11.0, 7.5, 4.0, 3.5 Hz, 1H, CHCH<sub>3</sub>), 2.60 (ddd,  $J$  = 17.5, 13.0, 5.0 Hz, 1H, one of CH<sub>A</sub>H<sub>B</sub>C(=O)), 2.44 (dt,  $J$  = 17.0, 4.5 Hz, 1H, one of CH<sub>A</sub>H<sub>B</sub>C(=O)), 2.37 – 2.24 (m, 1H, one of CH<sub>A</sub>H<sub>B</sub>CH<sub>2</sub>C(=O)), 1.98 (dtd,  $J$  = 13.5, 5.0, 3.5 Hz, 1H, one of CH<sub>A</sub>H<sub>B</sub>CH<sub>2</sub>C(=O)), 1.18 (d,  $J$  = 7.0 Hz, 3H, CH<sub>3</sub>).

**<sup>13</sup>C NMR** (126 MHz, CDCl<sub>3</sub>)  $\delta$ (ppm): 199.9 (C=O), 165.4 (C=CC(=O)), 138.4 (ArC), 129.9 (ArCH), 128.9 (ArCH), 126.8 (ArCH), 125.2 (C=CC(=O)), 33.3 (CH<sub>2</sub>C(=O)), 31.3 (CHCH<sub>3</sub>), 29.7 (CH<sub>2</sub>CH<sub>2</sub>C(=O)), 18.5 (CH<sub>3</sub>).

**IR** (film)  $\nu_{\text{max}}$ /cm<sup>-1</sup>: 2963, 2929, 2869 (C-H), 1665 (C=O), 1601 (C=C).

**HRMS** (ES<sup>+</sup>) exact mass calculated for [M+H]<sup>+</sup> (C<sub>13</sub>H<sub>15</sub>O)<sup>+</sup> requires  $m/z$  187.1117, found  $m/z$  187.1118.

Data is consistent with that published in the literature.<sup>11</sup>

$[\alpha]_D^{25} = -287.4$  ( $c$  0.85, CHCl<sub>3</sub>).

**(S)-4'-methoxy-6-methyl-5,6-dihydro-[1,1'-biphenyl]-3(4H)-one (2t)**

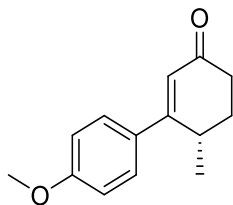

The title compound was prepared according to general procedure **F** from 4'-methoxy-6-methyl-4,5-dihydro-[1,1'-biphenyl]-3(2H)-one (**1t**) (28.1 mg, 0.130 mmol). The crude reaction mixture was transferred directly onto silica and purified by silica gel column chromatography (pentane/Et<sub>2</sub>O = 7/3) to provide the title compound as an amorphous yellow solid in 52% yield (14.6 mg) and 93% ee. [determined by HPLC chiralpak AD-H, hexane/isopropanol = 90/10 to 70/30, 1 ml/min,  $\lambda$  = 220 nm, t(major) = 10.00 min, t(minor) = 11.67 min].

**<sup>1</sup>H NMR** (500 MHz, CDCl<sub>3</sub>)  $\delta$ (ppm): 7.56 – 7.41 (m, 2H, ArCH), 6.99 – 6.88 (m, 2H, ArCH), 6.25 (s, 1H, CHC(=O)), 3.84 (s, 3H, OCH<sub>3</sub>), 3.19 – 3.10 (m, 1H, CHCH<sub>3</sub>), 2.58 (ddd,  $J$  = 17.5, 13.5, 5.0 Hz, 1H, one of CH<sub>A</sub>H<sub>B</sub>C(=O)), 2.46 – 2.38 (m, 1H, one of CH<sub>A</sub>H<sub>B</sub>C(=O)), 2.34 – 2.22 (m, 1H, one of CH<sub>A</sub>CH<sub>B</sub>CH<sub>2</sub>C(=O)), 2.01 – 1.93 (m, 1H, one of CH<sub>A</sub>CH<sub>B</sub>CH<sub>2</sub>C(=O)), 1.20 (d,  $J$  = 7.0 Hz, 3H, CHCH<sub>3</sub>).

**<sup>13</sup>C NMR** (126 MHz, CDCl<sub>3</sub>)  $\delta$ (ppm): 199.8 (C=O), 164.6 (ArC), 161.3 (ArC), 130.2 (C=CC(=O)), 128.3 (ArCH), 123.4 (CHC(=O)), 114.3 (ArCH), 55.5 (OCH<sub>3</sub>), 32.9 (CH<sub>2</sub>C(=O)), 30.8 (CHCH<sub>3</sub>), 29.5 (CH<sub>2</sub>CH<sub>2</sub>C(=O)), 18.4 (CHCH<sub>3</sub>).

**IR** (film)  $\nu_{\text{max}}$ /cm<sup>-1</sup>: 2932, 2839 (C-H), 1659 (C=O), 1593 (C=C), 1251 (C-O).

**HRMS** (ES<sup>+</sup>) exact mass calculated for [M+H]<sup>+</sup> (C<sub>14</sub>H<sub>17</sub>O<sub>2</sub>)<sup>+</sup> requires  $m/z$  217.1223, found  $m/z$  217.1223.

Data is consistent with that published in the literature.<sup>12</sup>

$[\alpha]_D^{25} = -66.0$  ( $c$  0.685, CHCl<sub>3</sub>).

## 1.5 Derivatisation of enantioenriched products

### (S)-(2-methyl-4-oxocyclohex-2-en-1-yl)methyl 4-methylbenzenesulfonate (**4a**)

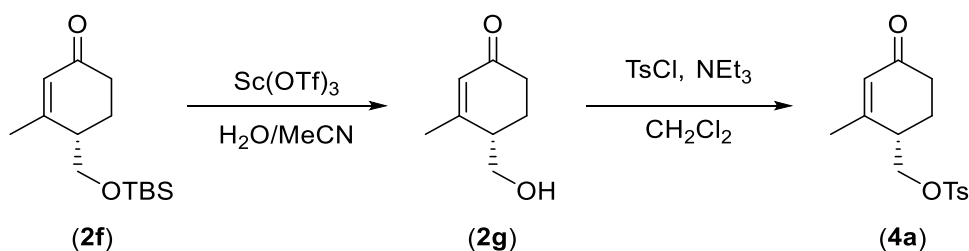

i. According to a literature procedure,<sup>13</sup> to a stirred solution of (S)-4-(hydroxymethyl)-3-methylcyclohex-2-en-1-one (**2f**) (479 mg, 1.88 mmol, 1.00 eq) in MeCN (9.5 ml) was added H<sub>2</sub>O (170  $\mu$ l, 5.00 eq, 9.4 mmol) followed by Sc(OTf)<sub>3</sub> (4.60 mg, 0.009 mmol, 0.005 eq). The reaction was stirred overnight at which point pH 7 phosphate buffer was added (15 ml). The aqueous phase was extracted with CH<sub>2</sub>Cl<sub>2</sub> (3 x 20 ml). The combined organic phases were washed with brine, dried over Na<sub>2</sub>SO<sub>4</sub>, filtered and concentrated *in vacuo*. The crude product was purified by silica gel column chromatography (EtOAc) to afford **2g** as a yellow oil in 58% yield (154 mg) and 99% ee.

ii. To a stirred solution of **2g** (98.0 mg, 0.700 mmol, 1.00 eq) in CH<sub>2</sub>Cl<sub>2</sub> (2.3 ml) at 0 °C was added NEt<sub>3</sub> (117  $\mu$ l, 0.840 mmol, 1.20 eq) followed by tosyl chloride (147 mg, 0.770 mmol, 1.10 eq). The reaction was stirred overnight at which point sat. aq. NH<sub>4</sub>Cl (10 ml) was added. The aqueous layer was extracted with EtOAc (3 x 20 ml). The combined organic phases were washed with brine, dried over Na<sub>2</sub>SO<sub>4</sub>, filtered, and concentrated *in vacuo*. The crude reaction mixture was purified by silica gel column chromatography (pentane/Et<sub>2</sub>O = 50/50 to 0/100) to afford the title compound as a colourless oil in 76% yield (157 mg) and 99% ee. [determined by HPLC chiralpak AD-H, hexane/isopropanol = 90/10 to 70/30, 1 ml/min,  $\lambda$  = 240 nm, t(major) = 18.90 min, t(minor) = 19.89 min].\*

\*The title compound should be stored in a freezer to avoid decomposition which occurs over a period of hours at ambient temperature.

<sup>1</sup>H NMR (500 MHz, Acetone-*d*<sub>6</sub>)  $\delta$ (ppm): 7.89 – 7.80 (m, 2H, ArH), 7.55 – 7.45 (m, 2H, ArH), 5.81 – 5.78 (m, 1H, CHC(=O)), 4.31 (dd, *J* = 10.0, 6.5 Hz, 1H, one of CH<sub>A</sub>H<sub>B</sub>O), 4.23 (dd, *J* = 10.0, 4.0 Hz, 1H, one of CH<sub>A</sub>H<sub>B</sub>O), 2.78 – 2.71 (m, 1H, CHCH<sub>2</sub>O), 2.45 (s, 3H, ArCH<sub>3</sub>), 2.29 (ddd, *J* = 17.0, 9.0, 5.0 Hz, 1H, one of CH<sub>2</sub>CH<sub>A</sub>H<sub>B</sub>C(=O)), 2.20 (ddd, *J* = 17.0, 8.0, 5.0 Hz, 1H, one of CH<sub>2</sub>CH<sub>A</sub>H<sub>B</sub>C(=O)), 2.00 – 1.93 (m, 2H, CH<sub>2</sub>CH<sub>2</sub>C(=O) and solvent peak), 1.91 (dd, *J* = 1.5, 1.0 Hz, 3H, CCH<sub>3</sub>).

**<sup>13</sup>C NMR** (126 MHz, Acetone-*d*<sub>6</sub>) δ(ppm): 197.8 (C=O), 159.8 (CH<sub>3</sub>C=CHC(=O)), 146.2 (ArC), 133.9 (ArC), 131.0 (ArCH), 129.5 (CH<sub>3</sub>C=CHC(=O)), 128.8 (ArCH), 70.9 (CH<sub>2</sub>O), 39.9 (CHCH<sub>2</sub>O), 34.9 (CH<sub>2</sub>CH<sub>2</sub>C(=O)), 25.8 (CH<sub>2</sub>CH<sub>2</sub>C(=O)), 22.4 (CH<sub>3</sub>C=CHC(=O)), 21.5 (ArCH<sub>3</sub>).

**IR** (film)  $\nu_{\text{max}}/\text{cm}^{-1}$ : 2955 (C-H), 1667 (C=O), 1121 (C-O).

**HRMS** (ES+) exact mass calculated for [M+H]<sup>+</sup> (C<sub>15</sub>H<sub>19</sub>O<sub>4</sub>S)<sup>+</sup> requires *m/z* 295.0999, found *m/z* 295.1000.

**[ $\alpha$ ]<sub>D</sub><sup>25</sup>** = -91.4 (*c* 0.05, CHCl<sub>3</sub>).



**(S)-4-(azidomethyl)-3-methylcyclohex-2-en-1-one (4b)**

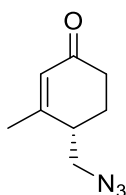

Sodium azide (43.5 mg, 0.680 mmol, 5.00 eq) was added to a stirred solution of (S)-(2-methyl-4-oxocyclohex-2-en-1-yl)methyl 4-methylbenzenesulfonate (**4a**) (40.0 mg, 0.136 mmol, 1.00 eq) in DMF (0.68 ml). The reaction was warmed to 45 °C and stirred for 1 hour at which point the reaction was deemed complete by TLC analysis (pentane/Et<sub>2</sub>O = 1/1). H<sub>2</sub>O (10 ml) was added and the aqueous layer extracted with EtOAc (3 x 10 ml). The combined organic phases were washed with brine, dried over Na<sub>2</sub>SO<sub>4</sub>, filtered, and concentrated *in vacuo*. The crude product was purified by silica gel column chromatography (pentane/Et<sub>2</sub>O = 1/1) to afford the title compound as a colourless oil in 51% yield (11.4 mg) and 99% ee. [determined by HPLC chiralpak AS-H, hexane/isopropanol = 70/30, 1 ml/min, λ = 230 nm, t(minor) = 19.37 min, t(major) = 25.50 min].

**<sup>1</sup>H NMR** (500 MHz, CDCl<sub>3</sub>) δ(ppm): 5.94 (s, 1H, CHC(=O)), 3.57 (dd, *J* = 12.5, 4.5 Hz, 1H, one of CH<sub>A</sub>H<sub>B</sub>N<sub>3</sub>), 3.49 (dd, *J* = 12.5, 8.0 Hz, 1H, one of CH<sub>A</sub>H<sub>B</sub>N<sub>3</sub>), 2.55 – 2.43 (m, 2H, CHCH<sub>2</sub>N<sub>3</sub> and one of CH<sub>A</sub>H<sub>B</sub>C(=O)), 2.35 (ddd, *J* = 17.5, 7.5, 5.0 Hz, 1H, one of CH<sub>A</sub>H<sub>B</sub>C(=O)), 2.17 – 2.02 (m, 2H, CH<sub>2</sub>CH<sub>2</sub>C(=O)), 2.00 (s, 3H, CH<sub>3</sub>).

**<sup>13</sup>C NMR** (126 MHz, CDCl<sub>3</sub>) δ(ppm): 198.6 (C=O), 160.6 (CH<sub>3</sub>C=C), 129.1 (CH<sub>3</sub>C=C), 52.7 (CH<sub>2</sub>N<sub>3</sub>), 39.8 (CHCH<sub>2</sub>N<sub>3</sub>), 34.2 (CH<sub>2</sub>C(=O)), 25.9 (CH<sub>2</sub>CH<sub>2</sub>C(=O)), 22.9 (CH<sub>3</sub>).

**HRMS** (ES<sup>+</sup>) exact mass calculated for [M+Na]<sup>+</sup> (C<sub>8</sub>H<sub>11</sub>N<sub>3</sub>NaO)<sup>+</sup> requires *m/z* 188.0794, found *m/z* 188.0796.

**IR** (film) ν<sub>max</sub>/cm<sup>-1</sup>: 2980, 2884 (C-H), 2095 (N=N=N), 1665 (C=O), 1626 (C=C).

[α]<sub>D</sub><sup>25</sup> = -88.5 (*c* 0.225, CHCl<sub>3</sub>).

**(S)-3-methyl-4-((phenylthio)methyl)cyclohex-2-en-1-one (4c)**

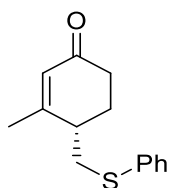

To a solution of 60% NaH (6.00 mg, 0.150 mmol, 1.10 eq) in DMF (0.7 ml) at 0 °C was added thiophenol (16.4  $\mu$ l, 0.16 mmol, 1.20 eq). The suspension was stirred for 30 min at which point (S)-(2-methyl-4-oxocyclohex-2-en-1-yl)methyl 4-methylbenzenesulfonate (**4a**) (40.0 mg, 0.140 mmol, 1.00 eq) in DMF (0.7 ml) was added at 0 °C. The reaction was deemed complete by TLC analysis at 1 h (pentane/Et<sub>2</sub>O = 1/1) at which point sat. aq. NH<sub>4</sub>Cl (10 ml) was added. The aqueous phase was extracted with Et<sub>2</sub>O (3 x 10 ml). The combined organic phases were washed with brine, dried over Na<sub>2</sub>SO<sub>4</sub>, filtered, and concentrated *in vacuo*. The crude product was purified by silica gel column chromatography (pentane/Et<sub>2</sub>O = 8/2 to 7/3) to afford the title compound as a yellow oil in 75% yield (24.4 mg) and 97% ee. [determined by HPLC chiralpak AS-H, hexane/isopropanol = 70/30, 1 ml/min,  $\lambda$  = 230 nm, t(minor) = 28.27 min, t(major) = 38.01 min].

**<sup>1</sup>H NMR** (400 MHz, CDCl<sub>3</sub>)  $\delta$ (ppm): 7.41 – 7.34 (m, 2H, ArH), 7.34 – 7.27 (m, 2H, ArH), 7.25 – 7.18 (m, 1H, ArH), 5.87 (t, *J* = 1.5 Hz, 1H, C=CH), 3.24 (dd, *J* = 13.0, 3.5 Hz, 1H, one of CH<sub>A</sub>H<sub>B</sub>S), 2.94 (dd, *J* = 13.0, 10.0 Hz, 1H, one of CH<sub>A</sub>H<sub>B</sub>S), 2.53 – 2.45 (m, 1H, CHCH<sub>2</sub>S), 2.45 – 2.37 (m, 1H, one of CH<sub>A</sub>H<sub>B</sub>C(=O)), 2.35 – 2.17 (m, 2H, one of CH<sub>A</sub>H<sub>B</sub>C(=O) and one of CH<sub>A</sub>H<sub>B</sub>CH<sub>2</sub>C(=O)), 2.17 – 2.05 (m, 1H, one of CH<sub>A</sub>H<sub>B</sub>CH<sub>2</sub>C(=O)), 1.96 (dd, *J* = 1.5, 0.5 Hz, 3H, CH<sub>3</sub>).

**<sup>13</sup>C NMR** (101 MHz, CDCl<sub>3</sub>)  $\delta$ (ppm): 198.8 (C=O), 162.7 (CH<sub>3</sub>C), 135.9 (ArC), 130.1 (ArCH), 129.2 (ArCH), 127.9 (CHC(=O)), 126.8 (ArCH), 39.3 (CHCH<sub>2</sub>S), 35.8 (CH<sub>2</sub>S), 33.6 (CH<sub>2</sub>C(=O)), 26.1 (CH<sub>2</sub>CH<sub>2</sub>C(=O)), 22.9 (CH<sub>3</sub>).

**IR** (film)  $\nu_{\text{max}}$ /cm<sup>-1</sup>: 2980, 2930, 2890 (C-H), 1665 (C=O), 1626 (C=C).

**HRMS** (ES+) exact mass calculated for [M+H]<sup>+</sup> (C<sub>14</sub>H<sub>17</sub>OS)<sup>+</sup> requires *m/z* 233.0995, found *m/z* 233.0996.

**$[\alpha]_D^{25}$**  = -8.76 (*c* 0.25, CHCl<sub>3</sub>).

**(S)-S-methyl O-((2-methyl-4-oxocyclohex-2-en-1-yl)methyl) carbonodithioate (4d)**

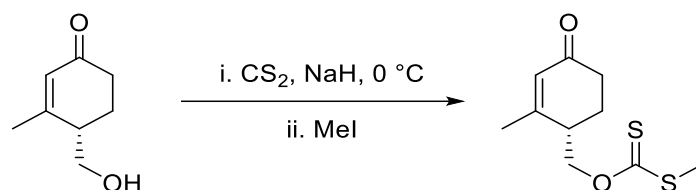

According to a modified literature procedure,<sup>14</sup> to a stirred solution of **2g** (50.0 mg, 0.357 mmol, 1.00 eq) in THF (0.7 ml) at 0 °C was added CS<sub>2</sub> (43.0 μl, 0.714 mmol, 2.00 eq). The solution was stirred for 30 min at which point 60% NaH (14.3 mg, 1.43 mmol, 4.00 eq) was added. The reaction was stirred for a further hour at which point methyl iodide (88.9 μl, 1.43 mmol, 4.00 eq) was added. The reaction was stirred until completion was observed by TLC analysis (Et<sub>2</sub>O) at which point H<sub>2</sub>O (10 ml) was added. The aqueous phase was extracted with Et<sub>2</sub>O (3 x 10 ml). The combined organic phases were washed with brine, dried over Na<sub>2</sub>SO<sub>4</sub>, filtered, and concentrated *in vacuo*. The crude product was purified by silica gel column chromatography (pentane/Et<sub>2</sub>O = 7/3 to 6/4) to provide the title compound as a yellow oil in 71% (58.4 mg) and 99% ee. [determined by HPLC chiralpak AS-H, hexane/isopropanol = 70/30, 1 ml/min, λ = 280 nm, t(major) = 25.27 min, t(minor) = 27.73 min].

<sup>1</sup>H NMR (500 MHz, Benzene-*d*<sub>6</sub>) δ(ppm): 5.86 – 5.71 (m, 1H, C=CH), 4.31 (dd, *J* = 11.0, 4.5 Hz, 1H CH<sub>A</sub>H<sub>B</sub>O), 4.27 (dd, *J* = 11.0, 7.0 Hz, 1H CH<sub>A</sub>H<sub>B</sub>O), 2.16 (ddd, *J* = 17.0, 9.5, 5.0 Hz, 1H, one of CH<sub>A</sub>H<sub>B</sub>C(=O)), 2.09 (s, 3H, SCH<sub>3</sub>), 1.97 – 1.94 (m, 2H, one of CH<sub>A</sub>H<sub>B</sub>C(=O) and CHCH<sub>2</sub>O), 1.53 – 1.40 (m, 2H, CH<sub>2</sub>CH<sub>2</sub>C(=O)), 1.32 (t, *J* = 1.0 Hz, 3H, CCH<sub>3</sub>).

<sup>13</sup>C NMR (126 MHz, Benzene-*d*<sub>6</sub>) δ(ppm): 216.2 (C=S), 196.3 (C=O), 157.7 (C=CCH<sub>3</sub>), 129.5 (C=CCH<sub>3</sub>), 73.3 (CH<sub>2</sub>O), 38.9 (CHCH<sub>2</sub>O), 34.6 (CH<sub>2</sub>C(=O)), 25.6 (CH<sub>2</sub>CH<sub>2</sub>C(=O)), 22.1 (CCH<sub>3</sub>), 18.9 (SCH<sub>3</sub>).

IR (film) ν<sub>max</sub>/cm<sup>-1</sup>: 2950 (C-H), 1670 (C=O) 1627 (C=C).

HRMS (ES+) exact mass calculated for [M+Na]<sup>+</sup> (C<sub>10</sub>H<sub>14</sub>NaO<sub>2</sub>S<sub>2</sub>)<sup>+</sup> requires *m/z* 253.0327, found *m/z* 253.0328.

[α]<sub>D</sub><sup>25</sup> = -119.1 (c 0.23, CHCl<sub>3</sub>).

**(3aR,7aS)-3a-methyl-3-thioxohexahydroisobenzofuran-5(3H)-one (4e)**

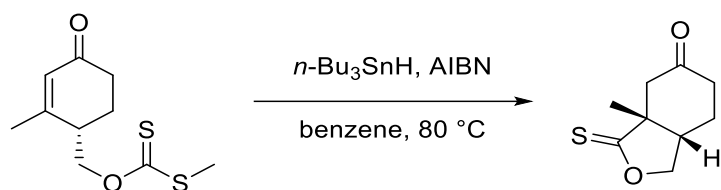

According to a modified literature procedure,<sup>14</sup> a solution of (S)-S-methyl O-((2-methyl-4-oxocyclohex-2-en-1-yl)methyl) carbonodithioate (**4d**) (20.0 mg, 87.0  $\mu\text{mol}$ , 1.00 eq), *n*-Bu<sub>3</sub>SnH (35.0  $\mu\text{l}$ , 0.13 mmol, 1.15 eq) and AIBN (1.40 mg, 8.70  $\mu\text{mol}$ , 0.100 eq) were heated to 80 °C in degassed benzene (2.9 ml) under an atmosphere of argon in a schlenk tube. The reaction mixture was stirred overnight and then allowed to cool to room temperature at which point the reaction mixture was transferred directly onto a column of silica. The compound was purified by silica gel column chromatography (pentane/EtOAc = 9/1 to 8/2 to 4/6) and obtained as a white solid in 39% yield (6.2 mg) and 97% ee. [determined by HPLC chiralpak AS-H, hexane/isopropanol = 70/30, 1 ml/min,  $\lambda$  = 254 nm, t(minor) = 18.18 min, t(major) = 22.75 min].\*

The resulting solid could be crystallised by slow evaporation of Et<sub>2</sub>O. The crystal obtained was >99% ee.

\*The presence of oxygen in this reaction will result in the formation of the lactone which is inseparable from the thionolactone by silica gel column chromatography.

<sup>1</sup>H NMR (500 MHz, Benzene-*d*<sub>6</sub>)  $\delta$ (ppm): 3.71 (dd, *J* = 9.5, 7.0 Hz, 1H, one of CH<sub>A</sub>H<sub>B</sub>O), 3.40 (dd, *J* = 9.5, 4.5 Hz, 1H, one of CH<sub>A</sub>H<sub>B</sub>O), 2.58 (d, *J* = 15.5 Hz, 1H, one of CH<sub>A</sub>H<sub>B</sub>CCH<sub>3</sub>), 2.05 (dd, *J* = 15.5, 1.0 Hz, 1H, one of CH<sub>A</sub>H<sub>B</sub>CCH<sub>3</sub>), 1.75 – 1.53 (m, 2H, CH<sub>2</sub>CH<sub>2</sub>C(=O)), 1.30 – 1.21 (m, 1H, CHCH<sub>2</sub>CO), 1.01 – 0.93 (m, 1H, one of CH<sub>A</sub>H<sub>B</sub>CH<sub>2</sub>C(=O)), 0.90 – 0.86 (m, 1H, one of CH<sub>A</sub>H<sub>B</sub>CH<sub>2</sub>C(=O)), 0.84 (s, 3H, CH<sub>3</sub>).

<sup>13</sup>C NMR (126 MHz, Benzene-*d*<sub>6</sub>)  $\delta$ (ppm): 227.4 (C=S), 205.4 (C=O), 76.8 (C-O), 56.4 (CCH<sub>3</sub>), 48.4 (CH<sub>2</sub>CCH<sub>3</sub>), 41.2 (CHCH<sub>2</sub>CO), 36.6 (CH<sub>2</sub>CH<sub>2</sub>C(=O)), 26.9 (CH<sub>3</sub>), 24.7 (CH<sub>2</sub>CH<sub>2</sub>C(=O)).

IR (film)  $\nu_{\text{max}}/\text{cm}^{-1}$ : 2948, 2911, 2857 (C-H), 1714 (C=O) 1228 (C=S).

MP: 92-94 °C.

$[\alpha]_D^{25} = -51.3$  (*c* 0.065, CHCl<sub>3</sub>).

**tert-Butyl (2*aS*,2*a1S*)-6-hydroxy-2*a1*-methyl-5-oxo-2*a*,2*a1*,3,4,5,7-hexahydrobenzo[*cd*]indole-1(2*H*)-carboxylate (4*f*)**

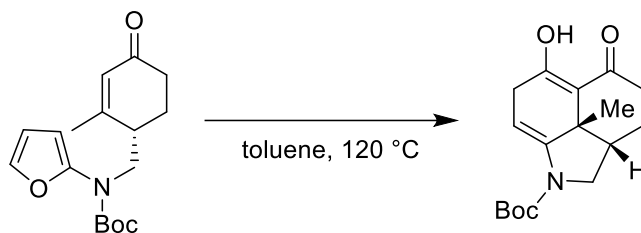

A solution of tert-butyl (S)-furan-2-yl((2-methyl-4-oxocyclohex-2-en-1-yl)methyl)carbamate (**2n**) (7.2 mg, 0.024 mmol) in distilled and degassed toluene (0.72 mL) was heated to 120 °C for 72 h. The reaction was allowed to cool to room temperature at which point the crude mixture was flushed through a plug of silica (pentane/Et<sub>2</sub>O = 1/1) to provide the product as a red-orange oil in 96% yield (6.9 mg) and 98% ee. [determined by HPLC chiralpak AS, hexane/isopropanol = 99/1, 1 ml/min, λ = 240 nm, t(major) = 15.64 t(minor) = 22.00].\*

\*Trace impurities from the prototropic shift visible by staining with ninhydrin appear to inhibit this reaction.

<sup>1</sup>H NMR (500 MHz, Methanol-*d*<sub>4</sub>) δ(ppm): 5.76 (bs, 1H, C=CH), 4.07 (dd, *J* = 11.5, 8.0 Hz, 1H, one of CH<sub>A</sub>H<sub>B</sub>N), 3.55 – 3.45 (dd, *J* = 11.0 Hz, 1H, one of CH<sub>A</sub>H<sub>B</sub>N (minor tautomer peak underneath)), 3.24 (dd, *J* = 21.0, 2.0 Hz, 1H, one of CH<sub>A</sub>H<sub>B</sub>C=CN), 2.90 (dd, *J* = 21.0, 6.5 Hz, 1H, one of CH<sub>A</sub>H<sub>B</sub>C=CN), 2.38 (ddd, *J* = 17.0, 13.0, 4.0 Hz, 1H, one of CH<sub>2</sub>CH<sub>A</sub>H<sub>B</sub>C(=O)), 2.32 – 2.22 (m, 1H, one of CH<sub>2</sub>CH<sub>A</sub>H<sub>B</sub>C(=O)), 2.15 (dddd, *J* = 13.0, 8.0, 4.5, 2.0 Hz, 1H, CHCH<sub>2</sub>N), 1.90 – 1.82 (m, 1H, one of CH<sub>A</sub>H<sub>B</sub>CH<sub>2</sub>C(=O)), 1.51 (d, *J* = 3.5 Hz, 9H, C(CH<sub>3</sub>)<sub>3</sub>), 1.41 – 1.29 (m, 1H, one of CH<sub>A</sub>H<sub>B</sub>CH<sub>2</sub>C(=O) (minor tautomer peak underneath)), 1.25 (s, 3H, CHCCH<sub>3</sub>).

<sup>13</sup>C NMR (126 MHz, Methanol-*d*<sub>4</sub>) δ(ppm): 196.4 (CH<sub>2</sub>C(=O)), 184.5 (COH), 153.8 (NC(=O)), 148.4 (NC=CH), 113.1 (CC(=O)), 96.6 (NC=CH), 82.0 (C(CH<sub>3</sub>)<sub>3</sub>), 54.7 (CH<sub>2</sub>N), 46.0 (CHCCH<sub>3</sub>), 43.0 (CH<sub>3</sub>CCH), 36.0 (C=CCH<sub>2</sub>), 32.8 (C(CH<sub>3</sub>)<sub>3</sub>), 28.6 (CH<sub>2</sub>CH<sub>2</sub>C(=O)), 28.5 (CH<sub>2</sub>CH<sub>2</sub>C(=O)), 27.8 (CHCCH<sub>3</sub>).

IR (film) ν<sub>max</sub>/cm<sup>-1</sup>: 2974 (C-H), 1709 (C=O), 1392, 1370, 1146 (C-O).

HRMS (ES<sup>+</sup>) exact mass calculated for [M+H]<sup>+</sup> (C<sub>17</sub>H<sub>23</sub>NO<sub>4</sub>)<sup>+</sup> requires *m/z* 306.1700, found *m/z* 306.1700.

[α]<sub>D</sub><sup>25</sup> = +84.8 (*c* 0.55, CHCl<sub>3</sub>).

## 1.6 Synthesis of catalysts

### (S)-2-amino-3-(naphthalen-1-yl)propan-1-ol (S16)

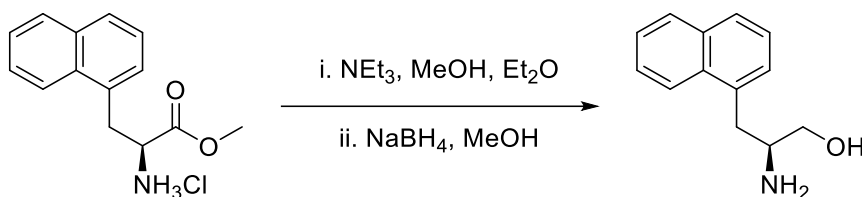

i. According to a literature procedure,<sup>15</sup> methyl (S)-2-amino-3-(naphthalen-1-yl)propanoate hydrochloride (2.00 g, 6.34 mmol, 1.00 eq) was stirred in MeOH as a slurry.  $\text{NEt}_3$  (1 ml) was added followed by  $\text{Et}_2\text{O}$  (35 ml). The mixture was stirred at  $-10\text{ }^\circ\text{C}$  for 1 h at which point the mixture was filtered and washed with  $\text{Et}_2\text{O}$  (30 ml). The filtrate was concentrated *in vacuo* and then placed under an Ar atmosphere. MeOH (18 ml) was added and the solution was cooled to  $0\text{ }^\circ\text{C}$ . To the stirred solution was added  $\text{NaBH}_4$  (0.600 g, 15.9 mmol, 2.50 eq) and the reaction mixture was allowed to warm to room temperature overnight.  $\text{H}_2\text{O}$  (30 ml) was added and the aqueous layer was extracted with  $\text{EtOAc}$  (3 x 30 ml). The combined organic phases were washed with brine, dried over  $\text{MgSO}_4$ , filtered, and concentrated *in vacuo*. The title compound (**S16**) was taken on without further purification.

$[\alpha]_D^{25} = -47$  (*c* 0.21,  $\text{CHCl}_3$ ).

**tert-butyl (S)-(1-hydroxy-3-(naphthalen-1-yl)propan-2-yl)carbamate (S17)**

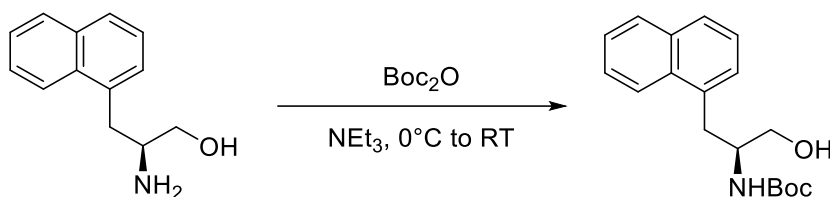

ii. To a stirred solution of (S)-2-amino-3-(naphthalen-1-yl)propan-1-ol (1.13 g, 5.61 mmol, 1.00 eq) in a 4/1 mixture of THF/H<sub>2</sub>O (14 ml) at 0 °C was added Na<sub>2</sub>CO<sub>3</sub> (1.33 g, 12.6 mmol, 2.24 eq) and Boc<sub>2</sub>O (1.35 g, 6.18 mmol, 1.10 eq). The reaction was allowed to warm to room temperature overnight at which point H<sub>2</sub>O was added (30 ml) and the solution brought to pH 2 by the addition of 0.1 M HCl. The aqueous layer was extracted with CH<sub>2</sub>Cl<sub>2</sub> (3 x 30 ml). The combined organic phases were washed with brine, dried over MgSO<sub>4</sub>, filtered, and concentrated *in vacuo*. The title compound (S17), a white solid, was taken on without further purification.

<sup>1</sup>H NMR (400 MHz, CDCl<sub>3</sub>) δ(ppm): 8.19 (d, *J* = 8.5 Hz, 1H, ArH), 7.94 – 7.82 (m, 1H, ArH), 7.75 (dt, *J* = 8.0, 1.0 Hz, 1H, ArH), 7.59 – 7.51 (m, 1H, ArH), 7.51 – 7.44 (m, 1H, ArH), 7.44 – 7.32 (m, 2H, ArH), 4.94 (bs, 1H, NH), 4.09 – 3.98 (m, 1H, CHNH), 3.76 – 3.49 (bm, 2H, CH<sub>2</sub>OH), 3.46 – 3.17 (bm, 2H, CH<sub>2</sub>Ar), 2.50 (bs, 1H, OH), 1.42 (bs, 9H).

<sup>13</sup>C NMR (101 MHz, CDCl<sub>3</sub>) δ(ppm): 156.3 (C=O), 134.32 (ArC), 134.1 (ArC), 132.3 (ArC), 128.9 (ArCH), 127.7 (ArCH), 127.5 (ArCH), 126.4 (ArCH), 125.8 (ArCH), 125.6 (ArCH), 124.0 (ArCH), 79.8 (OC(CH<sub>3</sub>)<sub>3</sub>), 64.3 (CH<sub>2</sub>OH), 53.2 (CHNH), 34.8 (CH<sub>2</sub>Ar), 28.5 (C(CH<sub>3</sub>)<sub>3</sub>).

**(S)-2-((tert-butoxycarbonyl)amino)-3-(naphthalen-1-yl)propyl 4-methylbenzenesulfonate (S18)**

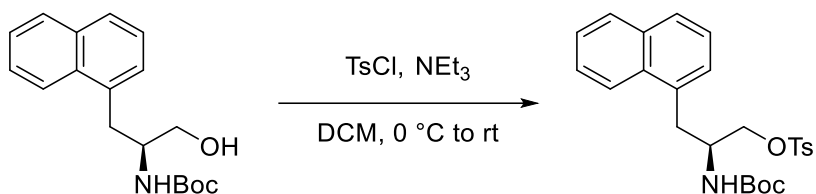

iii. To a solution of tert-butyl (S)-2-(1-hydroxy-3-(naphthalen-1-yl)propan-2-yl)carbamate (1.28 g, 6.35 mmol, 1.00 eq) in CH<sub>2</sub>Cl<sub>2</sub> (21 ml) at 0 °C was added NEt<sub>3</sub> (1.06 ml, 7.62 mmol, 1.20 eq) followed by tosyl chloride (1.33 g, 6.99 mmol, 1.10 eq). The reaction was allowed to warm to room temperature overnight until completion was observed by TLC analysis at which point H<sub>2</sub>O (30 ml) was added. The aqueous phase was extracted with EtOAc (3 x 30 ml), washed with brine, dried over MgSO<sub>4</sub>, filtered, and concentrated *in vacuo*. The crude product was purified by silica gel column chromatography (pentane/EtOAc = 85/15 to 8/2) to provide the title compound (**S18**) as an unstable white solid (foam) which was quickly taken on to the next step.



**tert-butyl (S)-(1-azido-3-(naphthalen-1-yl)propan-2-yl)carbamate (S19)**

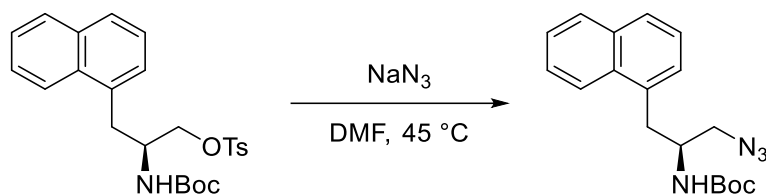

iv. To a stirred solution of (S)-2-((tert-butoxycarbonyl)amino)-3-(naphthalen-1-yl)propyl 4-methylbenzenesulfonate (2.10 g, 4.61 mmol, 1.00 eq) in DMF (23 ml) was added sodium azide (1.50 g, 23.1 mmol, 5.00 eq) behind a blast shield. The reaction was warmed to 45 °C and stirred until deemed complete by TLC analysis. H<sub>2</sub>O (30 ml) was added and the aqueous layer was extracted with EtOAc (3 x 30 ml). The combined organic phases were washed with brine, dried over MgSO<sub>4</sub>, filtered, and concentrated *in vacuo* behind a blast shield. The crude product was purified by silica gel column chromatography (pentane/EtOAc = 8/2) to provide the title compound (**S19**) as a white solid in 65% yield (0.975 g).

**<sup>1</sup>H NMR** (400 MHz, CDCl<sub>3</sub>) δ(ppm): 8.17 (d, *J* = 8.5 Hz, 1H, ArH), 7.87 (dd, *J* = 8.0, 1.5 Hz, 1H, ArH), 7.77 (d, *J* = 8.0 Hz, 1H, ArH), 7.57 (t, *J* = 7.5 Hz, 1H, ArH), 7.50 (ddd, *J* = 8.0, 7.0, 1.5 Hz, 1H, ArH), 7.42 (dd, *J* = 8.0, 7.0 Hz, 1H, ArH), 7.35 (d, *J* = 7.0 Hz, 1H, ArH), 4.80 (d, *J* = 8.5 Hz, 1H, NH), 4.21 – 4.03 (m, 1H, CHNH), 3.43 (m, 2H, one of CH<sub>A</sub>H<sub>B</sub>Ar and one of CH<sub>A</sub>H<sub>B</sub>N<sub>3</sub>), 3.33 (dd, *J* = 12.5, 4.0 Hz, 1H, one of CH<sub>A</sub>H<sub>B</sub>N<sub>3</sub>), 3.20 (dd, *J* = 14.0, 9.0 Hz, 1H, one of CH<sub>A</sub>H<sub>B</sub>Ar), 1.44 (s, 9H, C(CH<sub>3</sub>)<sub>3</sub>).

**<sup>13</sup>C NMR** (101 MHz, CDCl<sub>3</sub>) δ(ppm): 155.3 (C=O), 134.1 (ArC), 133.6 (ArC), 132.2 (ArC), 129.0 (ArCH), 127.9 (ArCH), 127.8 (ArCH), 126.6 (ArCH), 125.9 (ArCH), 125.6 (ArCH), 123.9 (ArCH), 79.9 (OC(CH<sub>3</sub>)<sub>3</sub>), 53.3 (CH<sub>2</sub>N<sub>3</sub>), 50.8 (CHNH), 35.6 (CH<sub>2</sub>Ar), 28.5 (OC(CH<sub>3</sub>)<sub>3</sub>).

**IR** (powder)  $\nu_{\max}/\text{cm}^{-1}$ : 3361 (N-H), 2093 (N=N=N), 1687 (C=O).

**HRMS** (ES+) exact mass calculated for [M+Na]<sup>+</sup> (C<sub>18</sub>H<sub>22</sub>N<sub>4</sub>NaO<sub>2</sub>)<sup>+</sup> requires *m/z* 349.1635, found *m/z* 349.1634.

$[\alpha]_D^{25} = +5.2$  (*c* 0.47, CHCl<sub>3</sub>).

**(R)-2-(3-((S)-1-azido-3-(naphthalen-1-yl)propan-2-yl)thioureido)-N-benzhydryl-3,3-dimethylbutanamide (S20)**

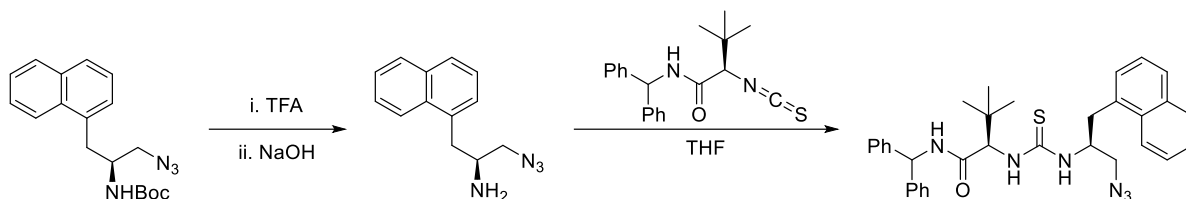

v. According to a literature procedure,<sup>16</sup> TFA (3 ml (1ml/mmol)) was added to (S)-1-azido-3-(naphthalen-1-yl)propan-2-amine (975 mg, 2.99 mmol, 1.00 eq). The reaction was stirred at 0 °C and allowed to warm to ambient temperature over 2h. The reaction was then concentrated under a stream of N<sub>2</sub> and diluted with Et<sub>2</sub>O (15 ml) and H<sub>2</sub>O (9 ml). NaOH pellets were added with stirring and the biphasic mixture was brought to pH 14. The phases were partitioned and the aqueous phase was extracted with Et<sub>2</sub>O (2 x 30 ml), washed with brine, dried over MgSO<sub>4</sub>, filtered, and concentrated *in vacuo* behind a blast shield. The amine was then diluted with THF (10.3 ml) and (R)-N-benzhydryl-2-isothiocyanato-3,3-dimethylbutanamide<sup>16</sup> (1.11 g, 3.29 mmol, 1.10 eq) was added. Once reaction completion was observed by TLC analysis the reaction mixture was concentrated *in vacuo* and purified by silica gel column chromatography (pentane/Et<sub>2</sub>O = 7/3 to 6/4) to provide the title compound (S20) as a white solid in 85% yield (1.44 g).

<sup>1</sup>H NMR (400 MHz, Methanol-*d*<sub>4</sub>) δ(ppm): 8.39 (dd, *J* = 8.5, 1.0 Hz, 1H, ArCH), 7.90 – 7.82 (m, 1H, ArCH), 7.76 (dd, *J* = 6.5, 2.5 Hz, 1H, ArCH), 7.54 (ddd, *J* = 8.5, 7.0, 1.5 Hz, 1H, ArCH), 7.48 (ddd, *J* = 8.0, 7.0, 1.0 Hz, 1H, ArCH), 7.44 – 7.36 (m, 2H, ArCH), 7.34 – 7.16 (m, 10H, ArCH), 6.19 (t, *J* = 4.0 Hz, 1H, CH(Ph)<sub>2</sub>), 5.10 – 5.00 (m, 1H, CH(CH<sub>2</sub>)<sub>2</sub>), 4.96 (s, 1H, CHC(CH<sub>3</sub>)<sub>3</sub>), 3.55 – 3.39 (m, 2H, one of CH<sub>A</sub>H<sub>B</sub>Ar and one of CH<sub>A</sub>H<sub>B</sub>N<sub>3</sub>), 3.39 – 3.17 (m, 2H, one of CH<sub>A</sub>H<sub>B</sub>Ar and one of CH<sub>A</sub>H<sub>B</sub>N<sub>3</sub> and solvent residue peak), 0.97 (s, 9H, C(CH<sub>3</sub>)<sub>3</sub>).

<sup>13</sup>C NMR (101 MHz, Methanol-*d*<sub>4</sub>) δ(ppm): 183.2 (C=S), 171.2 (C=O), 141.7 (ArC), 141.3 (ArC), 134.1 (ArC), 133.7 (ArC), 133.3 (ArC), 128.4 (ArCH), 128.1 (ArCH), 128.0 (ArCH), 127.9 (ArCH), 127.4 (ArCH), 127.3 (ArCH), 127.1 (ArCH), 127.1 (ArCH), 126.7 (ArCH), 125.8 (ArCH), 125.3 (ArCH), 125.0 (ArCH), 123.9 (ArCH), 65.1 (CHC(=O)), 56.8 (CH(Ph)<sub>2</sub>), 53.7 (CH(CH<sub>2</sub>)<sub>2</sub>), 53.1 (CH<sub>2</sub>N<sub>3</sub>), 34.7 (CH<sub>2</sub>Ar), 34.4 (C(CH<sub>3</sub>)<sub>3</sub>), 26.0 (C(CH<sub>3</sub>)<sub>3</sub>).

IR (powder)  $\nu_{\max}/\text{cm}^{-1}$ : 3287 (N-H), 2101 (N=N=N), 1644 (C=O).

HRMS (ES<sup>+</sup>) exact mass calculated for [M+Na]<sup>+</sup> (C<sub>33</sub>H<sub>36</sub>N<sub>6</sub>NaOS)<sup>+</sup> requires *m/z* 587.2564, found *m/z* 587.2564.

MP: 92-93 °C.

$[\alpha]_D^{25} = +65$  (*c* 0.15, CHCl<sub>3</sub>).

**(R)-N-benzhydryl-2-isocyanato-3,3-dimethylbutanamide (S21)**

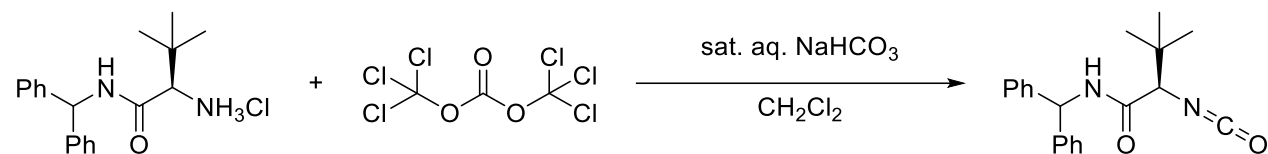

To a stirred solution of (R)-2-amino-N-benzhydryl-3,3-dimethylbutanamide hydrochloride (2.00 g, 6.01 mmol, 3.00 eq) in CH<sub>2</sub>Cl<sub>2</sub> (33.4 ml) at 0 °C was added sat. aq. NaHCO<sub>3</sub>. The reaction was stirred for 20 min at which point triphosgene (595 mg, 2.00 mmol, 1.00 eq) was added and the reaction was warmed to room temperature. Upon completion of the reaction the phases were separated and the aqueous layer was washed with CH<sub>2</sub>Cl<sub>2</sub> (3 x 30 ml). The combined organic phases were washed with brine, dried over Na<sub>2</sub>SO<sub>4</sub>, filtered and concentrated *in vacuo* to provide the title compound (**S21**) as a white solid in 66% yield (1.27 g) which was taken on without further purification.

<sup>1</sup>H NMR (400 MHz, CDCl<sub>3</sub>) δ(ppm): 7.37 – 7.05 (m, 10H, ArH), 6.53 (bd, *J* = 8.0 Hz, 1H, NH), 6.18 (d, *J* = 8.0 Hz, 1H, CHNH), 3.71 (s, 1H, CHN=C=O), 0.95 (s, 9H, C(CH<sub>3</sub>)<sub>3</sub>).

<sup>13</sup>C NMR (101 MHz, CDCl<sub>3</sub>) δ(ppm): 167.7 (NHC(=O)), 141.1 (ArC (rotamer A)), 141.0 (ArC (rotamer B)), 128.9 (2 x ArCH (rotamer A and B)), 127.8 (ArCH), 127.6 (N=C=O), 127.5 (ArCH), 68.7 (CHN=C=O), 57.4 (CHNH), 36.3 (C(CH<sub>3</sub>)<sub>3</sub>), 26.8 (C(CH<sub>3</sub>)<sub>3</sub>).

IR (powder)  $\nu_{\max}/\text{cm}^{-1}$ : 3659 (N-H), 1651 (N=C=O), 1651 (NHC=O).

HRMS (ES<sup>+</sup>) exact mass calculated for [M+Na]<sup>+</sup> (C<sub>20</sub>H<sub>22</sub>N<sub>2</sub>NaO<sub>2</sub>)<sup>+</sup> requires *m/z* 345.1574, found *m/z* 345.1574.

$[\alpha]_D^{25} = +2.6$  (*c* 1.06, CHCl<sub>3</sub>).

**(R)-2-(3-((S)-1-azido-3-(naphthalen-1-yl)propan-2-yl)ureido)-N-benzhydryl-3,3-dimethylbutanamide (S22)**

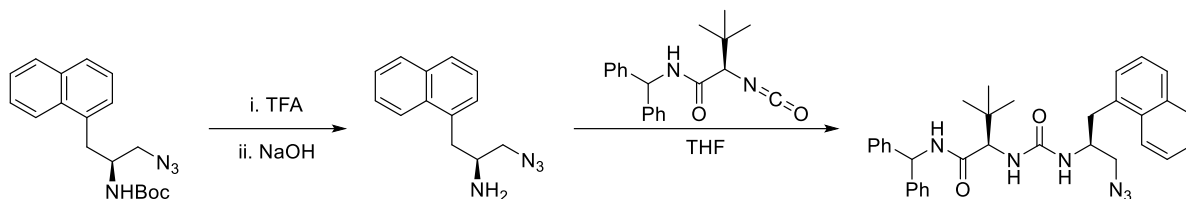

TFA (1.2 ml (1ml/mmol)) was added to (S)-1-azido-3-(naphthalen-1-yl)propan-2-amine (389 mg, 1.19 mmol, 1.00 eq). The reaction was stirred at 0 °C and allowed to warm to ambient temperature over 2h. The reaction was then concentrated under a stream of N<sub>2</sub> and diluted with Et<sub>2</sub>O (6 ml) and H<sub>2</sub>O (3.6 ml). NaOH pellets were added with stirring and the biphasic mixture was brought to pH 14. The phases were partitioned and the aqueous phase was extracted with Et<sub>2</sub>O (2 x 30 ml), washed with brine, dried over MgSO<sub>4</sub>, filtered, and concentrated *in vacuo* behind a blast shield. The amine was then diluted with THF (3.8 ml) and (R)-N-benzhydryl-2-isocyanato-3,3-dimethylbutanamide (387 mg, 1.20 mmol, 1.10 eq) was added. Once reaction completion was observed by TLC analysis the reaction mixture was concentrated *in vacuo* and purified by silica gel column chromatography (pentane/Et<sub>2</sub>O = 7/3 to 6/4) to provide the title compound (**S22**) as a white solid.

<sup>1</sup>H NMR (500 MHz, Methanol-*d*<sub>4</sub>) δ(ppm): 8.19 (d, *J* = 8.5 Hz, 1H, ArH), 7.85 (dd, *J* = 8.0, 1.5 Hz, 1H, ArH), 7.74 (dd, *J* = 7.0, 2.5 Hz, 1H, ArH), 7.53 (ddd, *J* = 8.5, 7.0, 1.4 Hz, 1H, ArH), 7.47 (ddd, *J* = 8.0, 7.0, 1.0 Hz, 1H, ArH), 7.40 – 7.34 (m, 2H, ArH), 7.34 – 7.16 (m, 11H, ArH and NH), 6.16 (s, 1H, CH(Ph)<sub>2</sub>), 4.59 (s, 1H, NH), 4.25 (tt, *J* = 7.0, 5.0 Hz, 1H, CHCH<sub>2</sub>N<sub>3</sub>), 4.07 (s, 1H, CHC(=O)), 3.42 – 3.36 (m, 2H, CH<sub>2</sub>N<sub>3</sub>), 3.36 – 3.27 (m, 1H, one of CH<sub>A</sub>H<sub>B</sub>CHCH<sub>2</sub>N<sub>3</sub> and solvent residue peak), 3.21 (dd, *J* = 14.0, 7.5 Hz, 1H, one of CH<sub>A</sub>H<sub>B</sub>CHCH<sub>2</sub>N<sub>3</sub>), 0.86 (s, 9H, C(CH<sub>3</sub>)<sub>3</sub>).

<sup>13</sup>C NMR (126 MHz, Methanol-*d*<sub>4</sub>) δ(ppm): 172.9 (CHC(=O)), 159.7 (NHC(=O)NH), 143.0 (ArC), 142.8 (ArC), 135.5 (ArC), 135.3 (ArC), 133.5 (ArC), 129.8 (ArCH), 129.5 (ArCH), 129.4 (ArCH), 129.1 (ArCH), 128.7 (ArCH), 128.5 (ArCH), 128.4 (ArCH), 128.2 (ArCH), 127.2 (ArCH), 126.6 (ArCH), 126.4 (ArCH), 124.9 (ArCH), 62.3 (CHC(=O)), 58.1 (CH(Ph)<sub>2</sub>), 55.6 (CH<sub>2</sub>N<sub>3</sub>), 51.7 (CHCH<sub>2</sub>N<sub>3</sub>), 36.8 (CH<sub>2</sub>CHCH<sub>2</sub>N<sub>3</sub>), 35.6 (C(CH<sub>3</sub>)<sub>3</sub>), 27.1 (C(CH<sub>3</sub>)<sub>3</sub>).

IR (powder)  $\nu_{\max}/\text{cm}^{-1}$ : 3659 (N-H), 2100 (N=N=N), 1629 (C=O).

HRMS (ES<sup>+</sup>) exact mass calculated for [M+Na]<sup>+</sup> (C<sub>33</sub>H<sub>36</sub>N<sub>6</sub>NaO<sub>2</sub>)<sup>+</sup> requires *m/z* 571.2792, found *m/z* 571.2784.

**MP:** 107-108 °C.

$[\alpha]_D^{25} = +29.2$  ( $c$  0.59,  $\text{CHCl}_3$ ).

**C1**

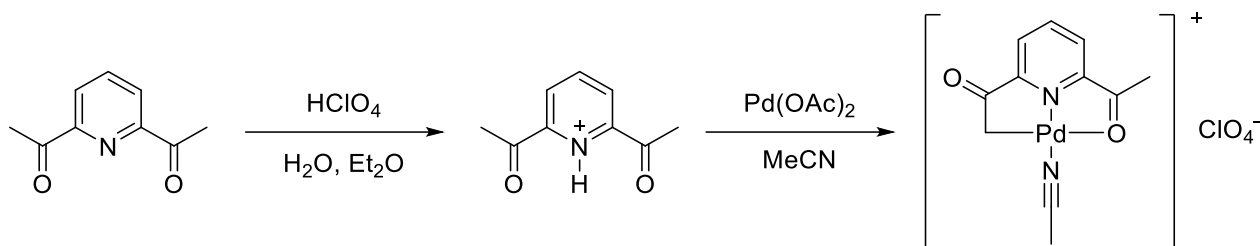

i. According to a literature procedure,<sup>1b</sup> 48-50% aq.  $\text{HClO}_4$  (3.6 g, 17.9 mmol, 1.5 eq) was slowly added to a solution of 1,1'-(pyridine-2,6-diyl)bis(ethan-1-one) (1.95 g, 12.0 mmol, 1.00 eq) in  $\text{Et}_2\text{O}$  (40 ml). The reaction mixture was stirred for 2 h. The precipitate was filtered, washed with  $\text{Et}_2\text{O}$  and recrystallized from acetone/ $\text{Et}_2\text{O}$  to provide the desired salt in 52% yield (1.64 g).

ii. The salt (894 mg, 3.39 mmol, 1.00 eq) was then stirred in acetonitrile (40 ml) with  $\text{Pd}(\text{OAc})_2$  (762 mg, 3.39 mmol, 1.00 eq) for 2 h. The reaction mixture was concentrated to dryness. Acetone was added and the mixture concentrated again, this was repeated two more times. The resulting mixture was dissolved in acetonitrile (2 ml) and  $\text{Et}_2\text{O}$  (10 ml) was added. The suspension was filtered and washed with  $\text{Et}_2\text{O}$  to provide a brown solid in quantitative yield (1.38 g).

$^1\text{H NMR}$  (400 MHz, Acetonitrile- $d_3$ )  $\delta$ (ppm): 8.39 (t,  $J = 8.0$  Hz, 1H, ArH), 8.12 (dd,  $J = 8.0, 1.5$  Hz, 1H, ArH), 8.03 (dd,  $J = 8.0, 1.5$  Hz, 1H, ArH), 3.60 (s, 2H,  $\text{CH}_2$ ), 2.84 (s, 3H,  $\text{CH}_3$ ).

$^{13}\text{C NMR}$  (101 MHz, Acetonitrile- $d_3$ )  $\delta$ (ppm): 200.0 ( $\text{C}=\text{O}-\text{Pd}$ ), 197.7 ( $\text{CH}_2\text{C}=\text{O}$ ), 156.9 (ArC), 156.1 (ArC), 143.9 (ArCH), 129.9 (ArCH), 39.1 ( $\text{CH}_2$ ), 28.5 ( $\text{CH}_3$ ).

**IR** (powder)  $\nu_{\text{max}}/\text{cm}^{-1}$ : 2328 ( $\text{C}\equiv\text{N}$ ), 1705, 1637 ( $\text{C}=\text{O}$ ), 1595 ( $\text{C}=\text{N}$ ), 1074 ( $\text{Cl}-\text{O}$ ).

Data is consistent with that given in the literature.<sup>1b</sup>

## 1.7 Deuterium labelling study

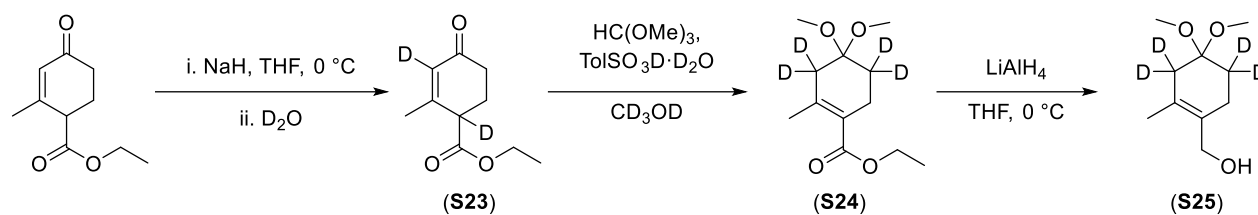

### S23

i. To a stirred solution of 60% NaH (242 mg, 6.04 mmol, 1.10 eq) in THF (27.5 ml) was added Hagemann's ester (1.00 g, 5.49 mmol, 1.00 eq). The reaction was stirred at 0 °C for 10 min at which point D<sub>2</sub>O (10 ml) was added. The aqueous phase was extracted with EtOAc (3 x 20 ml). The combined organic phases were washed with brine, dried over Na<sub>2</sub>SO<sub>4</sub>, filtered and concentrated *in vacuo*. The entire process was repeated a second time to afford **S23** in 72% yield (728 mg) which was taken on without further purification.

### S24

ii. *p*TsOH·H<sub>2</sub>O (150 mg, 0.790 mmol, 0.200 eq) was dissolved in D<sub>2</sub>O (5 ml) and concentrated *in vacuo*. This process was repeated twice to provide *p*TsOD·D<sub>2</sub>O. *p*TsOD·D<sub>2</sub>O was placed under an atmosphere of Ar and CD<sub>3</sub>OD (22 ml) was added. To this solution was added deuterated **S23** (728 mg, 3.95 mmol, 1.00 eq) followed by trimethyl orthoformate (1.30 ml, 11.9 mmol, 3.00 eq). The reaction was stirred for 3 hours at which point a saturated solution of K<sub>2</sub>CO<sub>3</sub> in D<sub>2</sub>O was added (20 ml). The aqueous layer was extracted with EtOAc (3 x 20 ml). The combined organic phases were washed with brine, dried over Na<sub>2</sub>SO<sub>4</sub>, filtered and concentrated *in vacuo* to afford the crude product (**S24**) as a yellow oil in 65% yield (614 mg) which was taken on without further purification.

### S25

iii. To a solution of **S24** (614 mg, 2.67 mmol, 1.00 eq) in THF (4.5 ml) at 0 °C was added LiAlH<sub>4</sub> (506 mg, 13.3 mmol, 5.00 eq). The reaction was stirred for 2 h at which point the reaction was diluted with Et<sub>2</sub>O (20 ml) and cooled to 0 °C. H<sub>2</sub>O (0.5 ml) was added, followed by 15% aqueous NaOH solution (0.5 ml), followed by H<sub>2</sub>O (1.5 ml). The biphasic mixture was stirred for 15 min at rt at which point MgSO<sub>4</sub> was added and stirring was maintained for a further 15 min. The mixture was filtered and concentrated *in vacuo*. The crude product was purified by silica gel column chromatography (Et<sub>2</sub>O) to provide **S25** in 46% yield (243 mg).

**$^1\text{H}$  NMR** (500 MHz,  $\text{CDCl}_3$ )  $\delta$ (ppm): 4.12 (d,  $J = 5.0$  Hz, 2H,  $\text{CH}_2\text{OH}$ ), 3.22 (s,  $\text{C}(\text{OCH}_3)_2$  (partial deuterium incorporation)), 2.18 (s, 2H,  $\text{CCH}_2\text{C}(\text{OCH}_3)_2$  (deuterated) and  $\text{CH}_2\text{CH}_2\text{C}(\text{OCH}_3)_2$ ), 1.81 (m,  $\text{CH}_2\text{CH}_2\text{C}(\text{OCH}_3)_2$  (deuterated)), 1.73 – 1.63 (m, 2H,  $\text{CCH}_3$  (partial deuterium incorporation)), 1.33 (t,  $J = 5.5$  Hz, 1H, OH).

**$^{13}\text{C}$  NMR** (126 MHz,  $\text{CDCl}_3$ )  $\delta$ (ppm): 129.5 ( $\text{CCH}_2\text{OH}$ ), 127.4 ( $\text{CCH}_3$ ), 99.5 ( $\text{C}(\text{OCH}_3)_2$ ), 62.5 ( $\text{CH}_2\text{OH}$ ), 48.0 ( $\text{C}(\text{OCH}_3)_2$ ), 47.8 – 46.6 (m,  $\text{C}(\text{OCD}_3)_2$ ), 40.0 (m,  $\text{CCD}_2\text{C}(\text{OCH}_3)_2$ ), 28.9 – 27.7 (m,  $\text{CH}_2\text{CD}_2\text{C}(\text{OCH}_3)_2$ ), 25.9 – 25.4 (m,  $\text{CH}_2\text{CD}_2\text{C}(\text{OCH}_3)_2$ ), 19.1 – 17.7 (m,  $\text{CCH}_3$ ).

**IR** (film)  $\nu_{\text{max}}/\text{cm}^{-1}$ : 3401 (O-H), 2215, 2129, 2070 (C-H), 1118, 1052 (C-O).

**$^1\text{H}$  NMR** (500 MHz,  $\text{CDCl}_3$ ) of **S25** overlaid with **S2**.

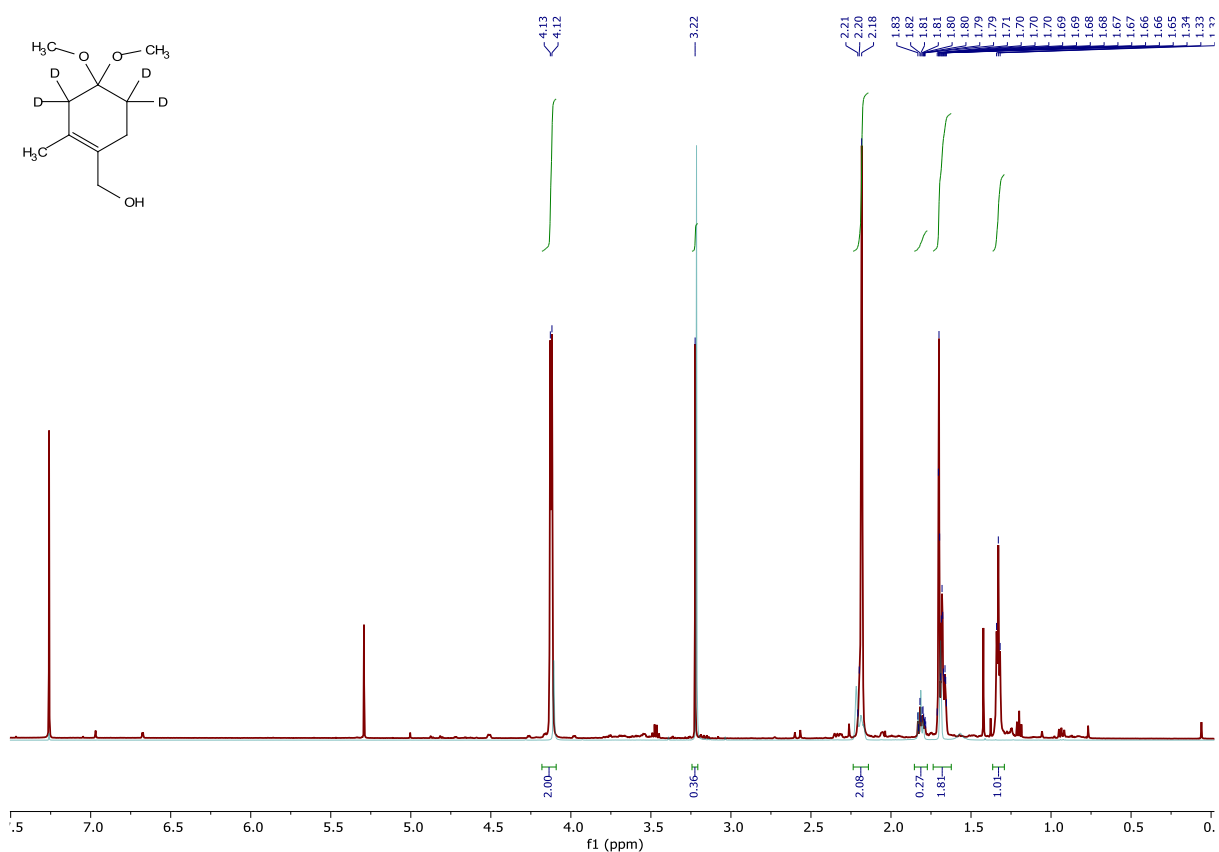

<sup>13</sup>C NMR (126 MHz, CDCl<sub>3</sub>) of S25 overlaid with S2.

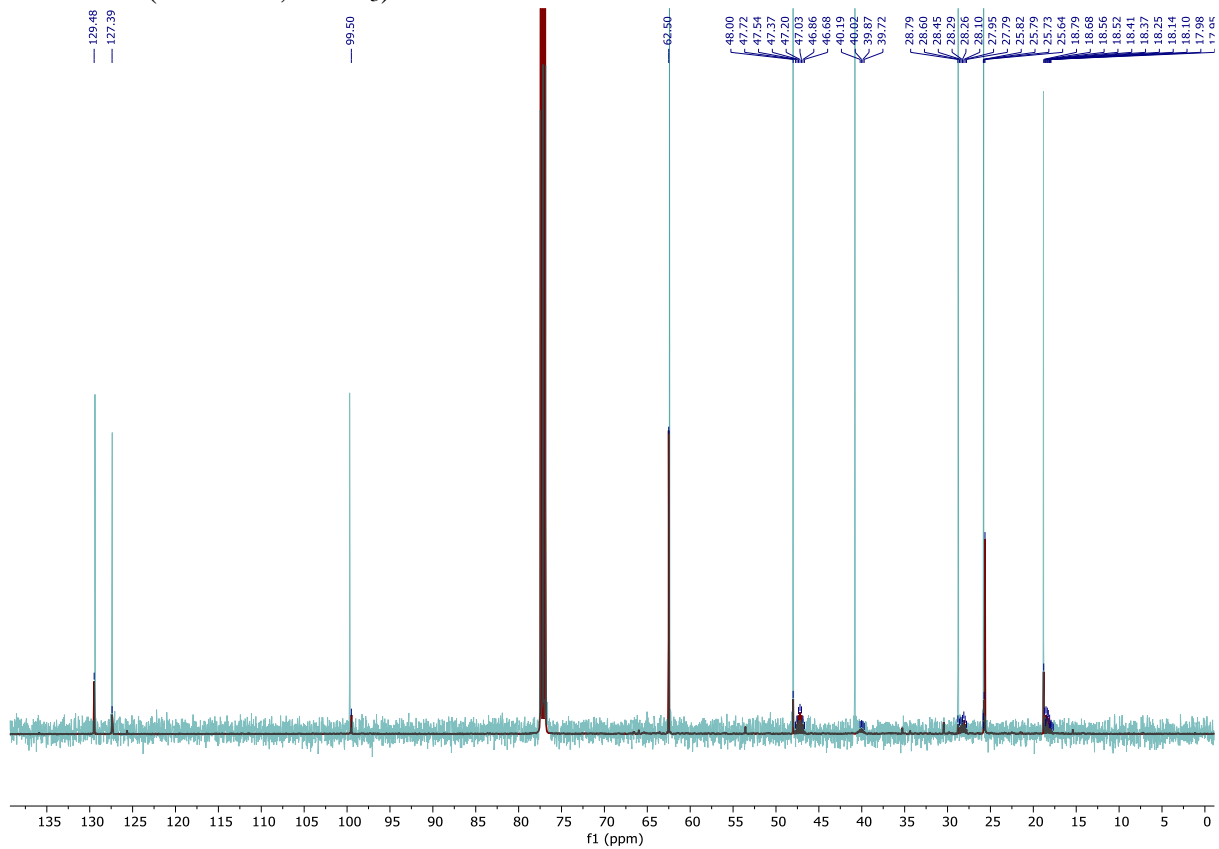



**S26**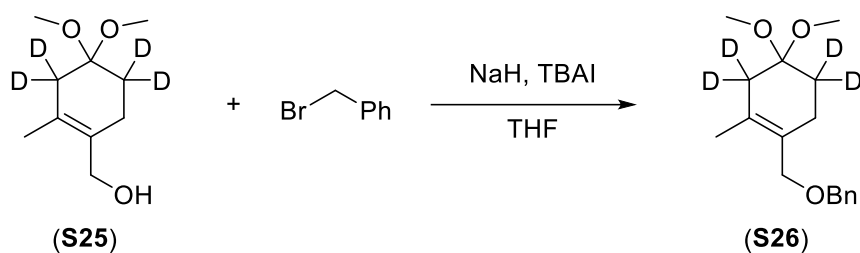

To a solution of **S25** (282 mg, 1.22 mmol, 1.00 eq) in THF (3.1 ml) at 0 °C was added 60% NaH (98 mg, 2.45 mmol, 2.00 eq). The suspension was stirred for 30 min at which point BnBr (315 mg, 1.84 mmol, 1.50 eq) and TBAI (44.0 mg, 0.12 mmol, 0.100 eq) were added. The reaction was stirred overnight at which point sat. aq NH<sub>4</sub>Cl (20 ml) was added. The aqueous layer was extracted with EtOAc (3 x 20 ml). The combined organic phases were washed with brine, dried over Na<sub>2</sub>SO<sub>4</sub>, filtered and concentrated *in vacuo*. The crude product was purified by silica gel column chromatography (pentane/Et<sub>2</sub>O 9/1 to 8/2) to afford the **S26** as a yellow oil in 68% yield (238 mg).

**<sup>1</sup>H NMR** (500 MHz, CDCl<sub>3</sub>) δ(ppm): 7.34 (d, *J* = 4.5 Hz, 4H, ArH), 7.30 – 7.26 (m, 1H, ArH), 4.46 (s, 2H, CH<sub>2</sub>Ph), 4.01 (s, 2H, CH<sub>2</sub>OCH<sub>2</sub>Ph), 3.23 (s, C(OCH<sub>3</sub>)<sub>2</sub> (partial deuterium incorporation)), 2.22 (s, CCH<sub>2</sub>C(OCH<sub>3</sub>), (deuterated)), 2.18 (s, 2H, CH<sub>2</sub>CH<sub>2</sub>C(OCH<sub>3</sub>)), 1.81 (dt, *J* = 9.5, 6.5 Hz, CH<sub>2</sub>CH<sub>2</sub>C(OCH<sub>3</sub>), (deuterated)), 1.70 – 1.60 (m, CCH<sub>3</sub> (partial deuterium incorporation)).

**<sup>13</sup>C NMR** (126 MHz, CDCl<sub>3</sub>) δ(ppm): 138.8 (ArC), 128.5 (CCH<sub>2</sub>OBn), 127.9 (ArCH), 127.7 (ArCH), 127.1 (CCH<sub>3</sub>), 99.5 (C(OCH<sub>3</sub>)<sub>2</sub>), 72.0 (CH<sub>2</sub>Ph), 69.3 (CH<sub>2</sub>O), 48.0 (OCH<sub>3</sub>), 47.2 (m, OCD<sub>3</sub>), 41.5 – 39.3 (m, CD<sub>2</sub>CCH<sub>3</sub>), 28.9 – 27.6 (m, CH<sub>2</sub>CD<sub>2</sub>C(OCH<sub>3</sub>)<sub>2</sub>), 25.9 (m, CH<sub>2</sub>CH<sub>2</sub>C(OCH<sub>3</sub>)<sub>2</sub>), 19.2 – 18.0 (m, CCH<sub>3</sub>).

**IR** (film) ν<sub>max</sub>/cm<sup>-1</sup>: 3030, 2981, 2916, 2851 (C-H), 1715 (C=O), 1066 (C-O).

**<sup>1</sup>H NMR (500 MHz, CDCl<sub>3</sub>) of S26 overlaid with S3.**

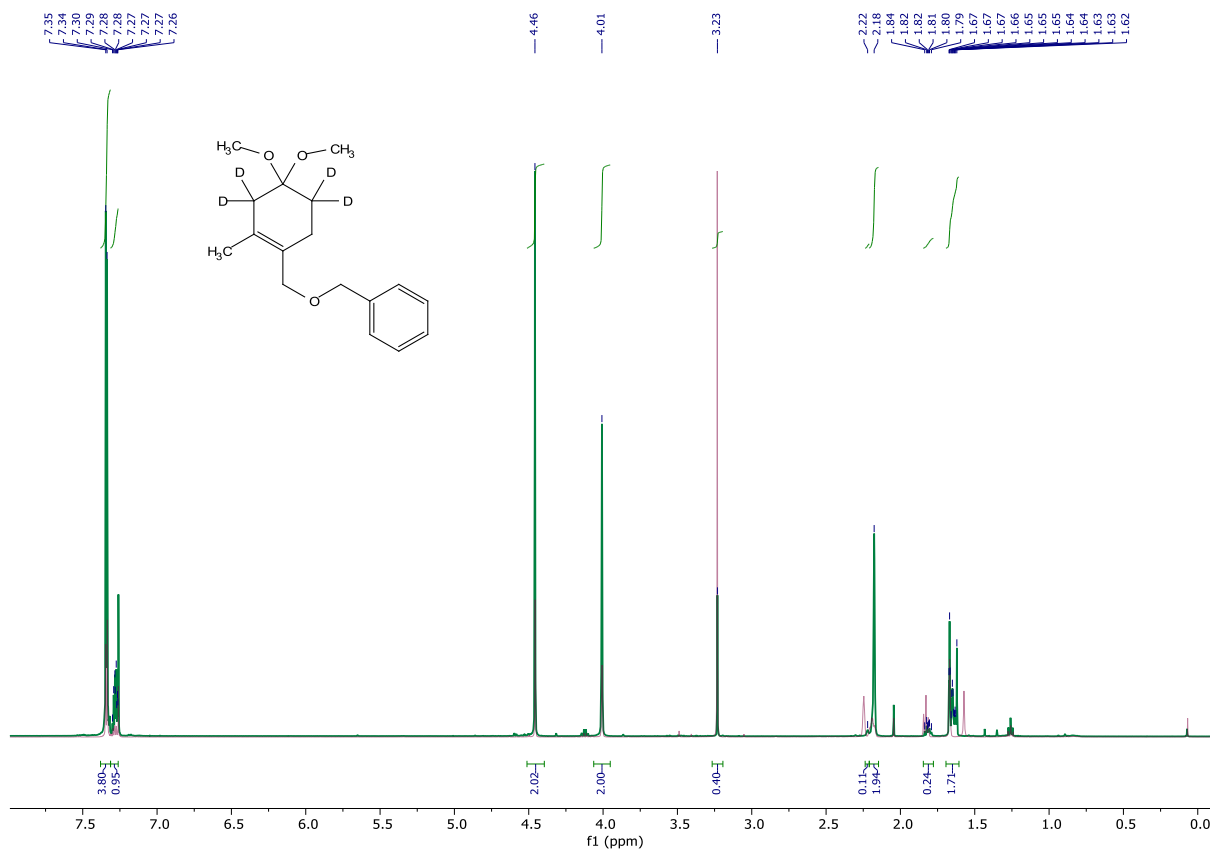

**<sup>13</sup>C NMR (126 MHz, CDCl<sub>3</sub>) of S26 overlaid with S3**

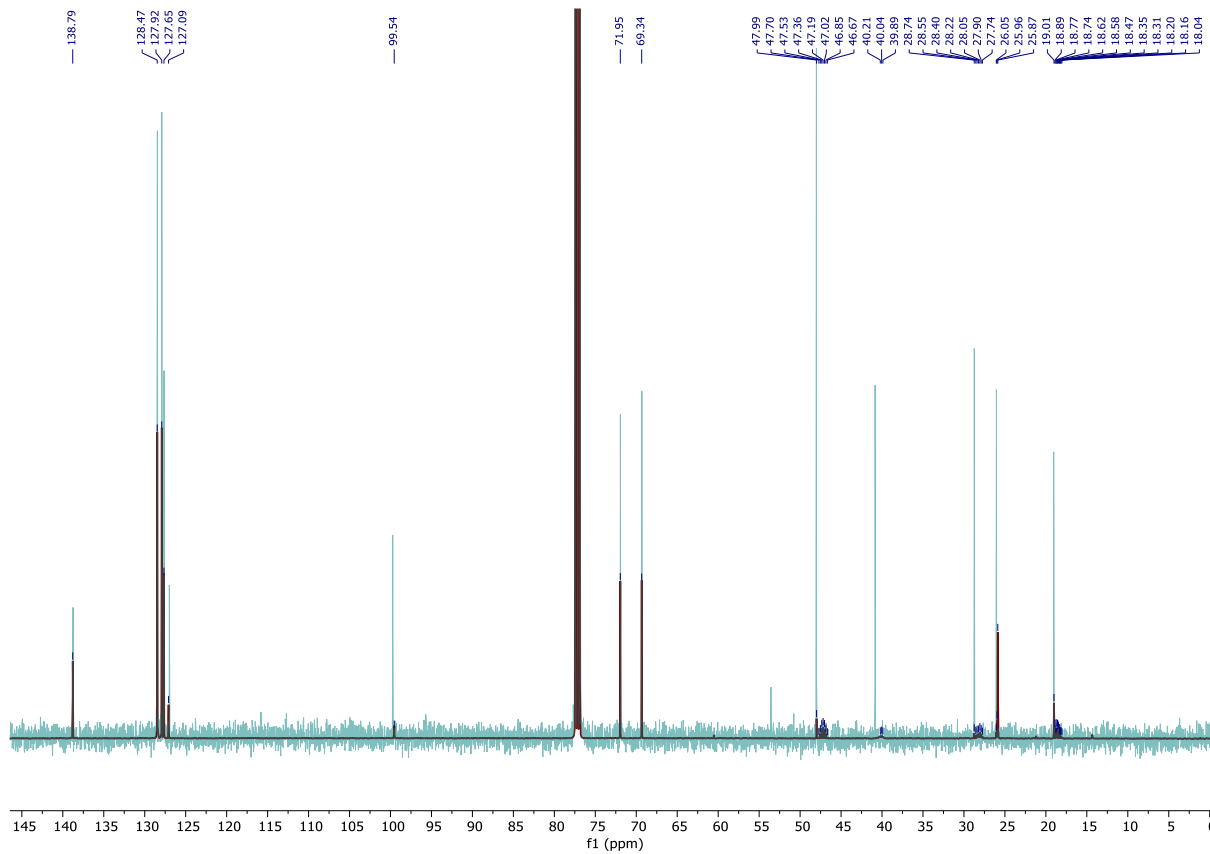

**S27**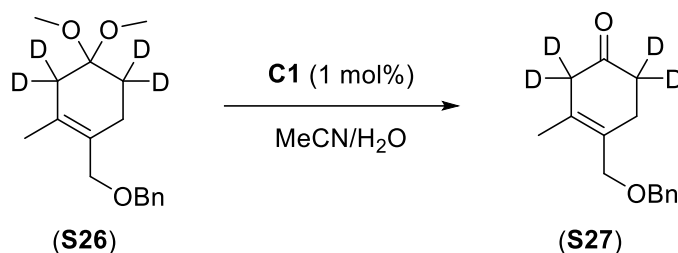

Compound **S27** was prepared according to general procedure **B** from **S26** (218 mg, 0.78 mmol, 1.00 eq). Upon completion of the reaction as judged by TLC analysis (pentane/Et<sub>2</sub>O = 9/1) the reaction mixture was transferred directly to silica gel and purified by silica gel column chromatography (pentane/Et<sub>2</sub>O = 95/5) to afford the title compound as a yellow oil. Yield assumed quantitative.

**<sup>1</sup>H NMR** (400 MHz, CDCl<sub>3</sub>) δ(ppm): 7.42 – 7.26 (m, 5H, ArH), 4.50 (s, 2H, CH<sub>2</sub>Ph), 4.06 (s, 2H, CH<sub>2</sub>OCH<sub>2</sub>Ph), 2.82 (s, 91.5 % D, CCH<sub>2</sub>C(=O)), 2.54 (s, 2H, CH<sub>2</sub>CH<sub>2</sub>C(=O)), 2.47 (m, 88% D, CH<sub>2</sub>CH<sub>2</sub>C(=O)), 1.76 – 1.66 (m, 48% D, CH<sub>3</sub>).

**<sup>13</sup>C NMR** (126 MHz, CDCl<sub>3</sub>) δ(ppm): 210.9 (C=O), 138.4 (ArC), 129.5 (CH<sub>3</sub>C), 128.6 (ArCH), 128.4 (CH<sub>3</sub>C=C), 127.9 (ArCH), 127.9 (ArCH), 72.4 (CH<sub>2</sub>Ph), 69.1 (CH<sub>2</sub>OCH<sub>2</sub>Ph), 45.13 (m, CCH<sub>2</sub>C(=O)), 39.05 – 37.84 (m, CH<sub>2</sub>CH<sub>2</sub>C(=O)), 27.88 – 27.59 (m, CH<sub>2</sub>CH<sub>2</sub>C(=O)), 18.84 – 17.64 (m, CH<sub>3</sub>).

**IR** (film) ν<sub>max</sub>/cm<sup>-1</sup>: 2030, 2905, 2845 (C-H), 1674 (C=C), 1069 (C-O).

Quantitative  $^1\text{H}$  NMR (400 MHz,  $\text{CDCl}_3$ ) of **S27** overlaid with **1a**.

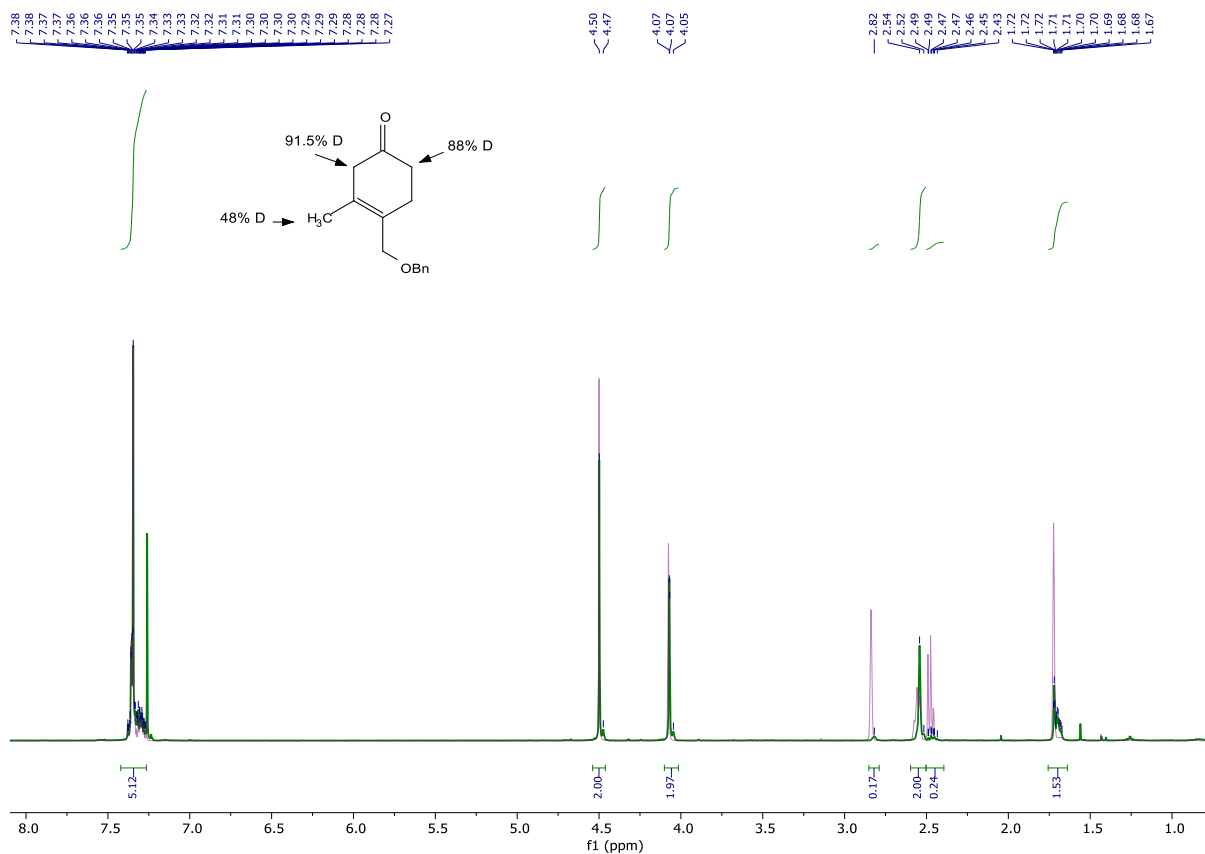

$^{13}\text{C}$  NMR (126 MHz,  $\text{CDCl}_3$ ) of **S27** overlaid with **1a**.

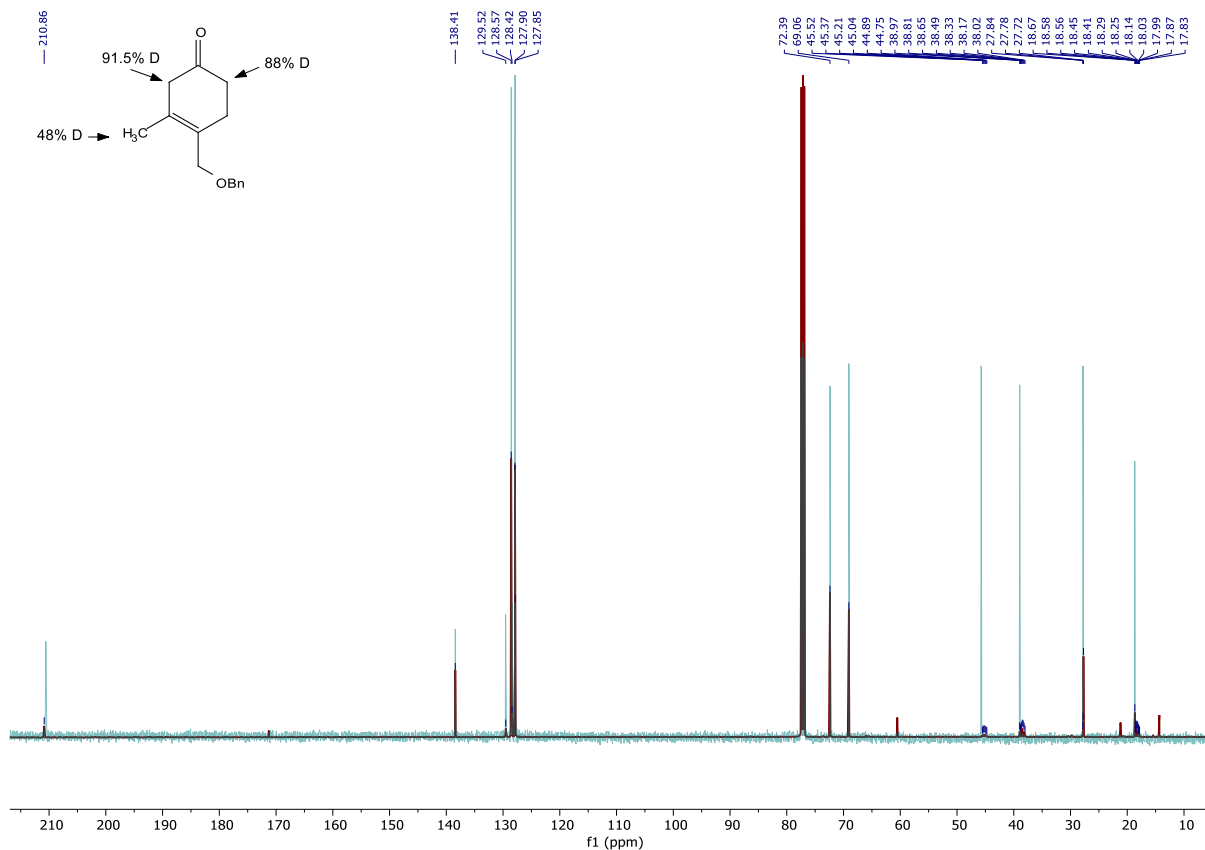

## Crossover Experiment

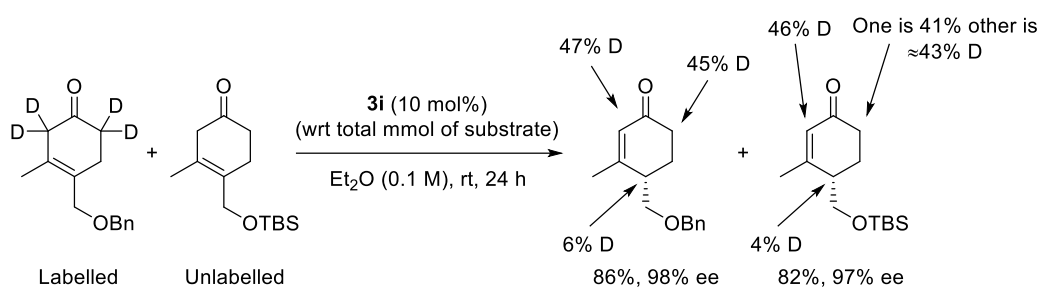

Compounds **S27** and **1f** were subjected to the prototropic shift reaction conditions. Exchange of the alpha protons was observed, resulting in approximately 50% deuterium incorporation in both alpha positions of the final products. This is consistent with the pre-equilibrium described in the literature as well as computational studies.<sup>17</sup> Only low levels of deuterium incorporation were observed at the  $\gamma$ -position consistent with reprotonation being the rate determining step.

## Quantitative NMR spectra obtained after crossover experiment

<sup>1</sup>H NMR (400 MHz, CDCl<sub>3</sub>)

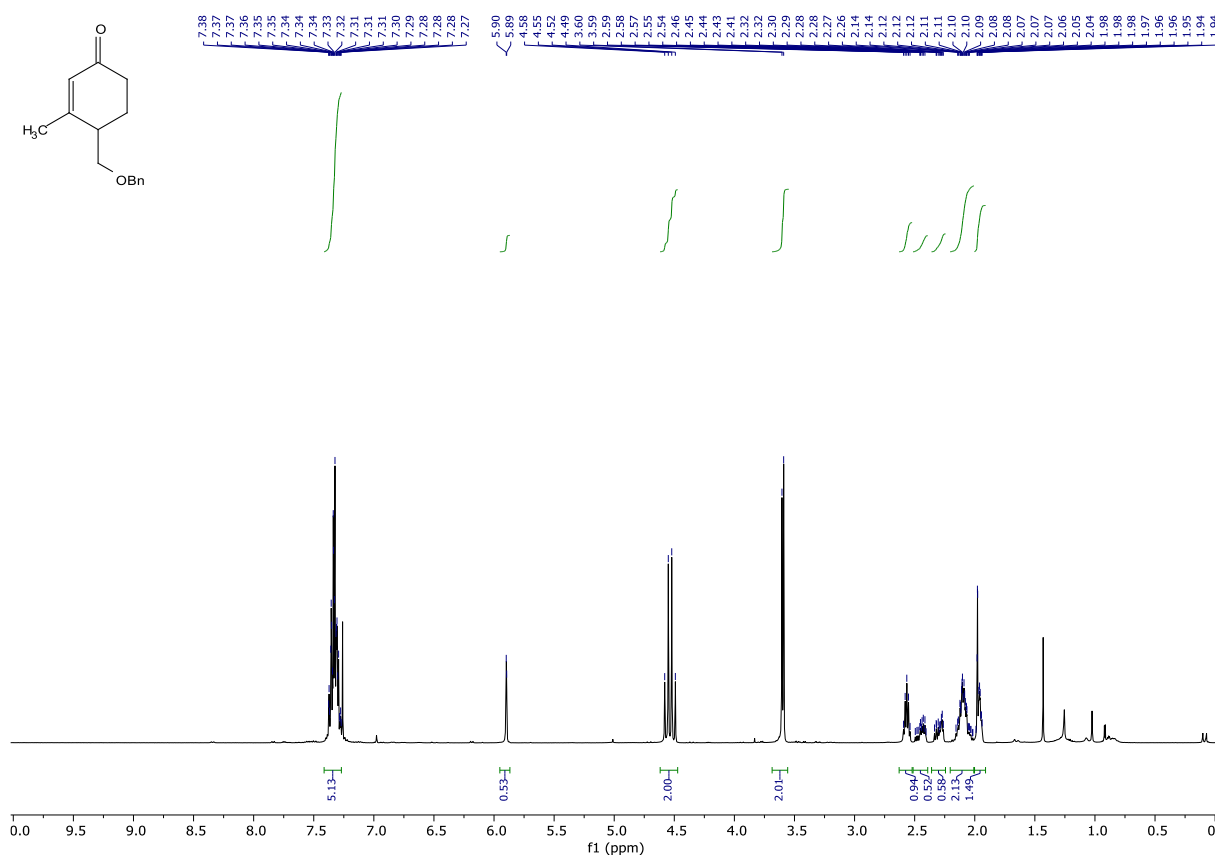

<sup>1</sup>H NMR (400 MHz, CDCl<sub>3</sub>)

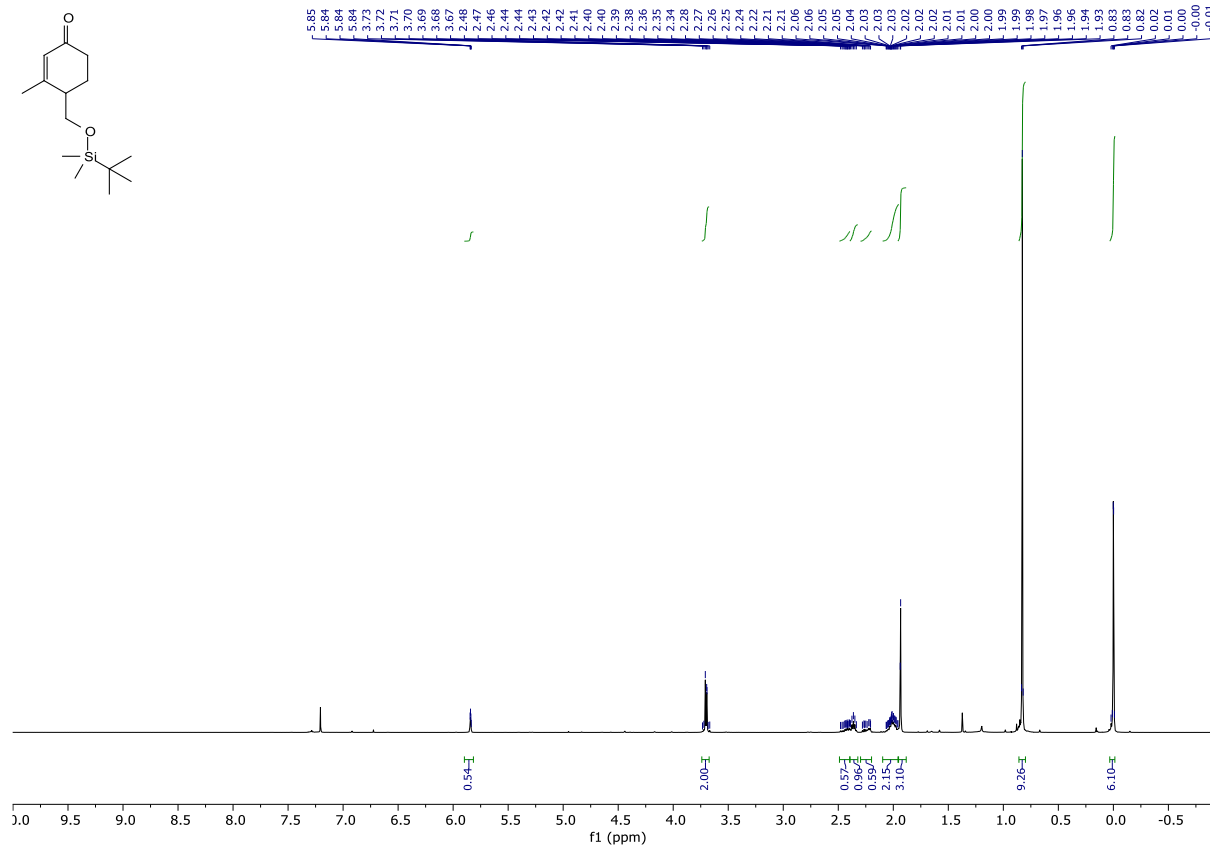

## 2.1 Single Crystal X-Ray Diffraction Data

CCDC 1982997

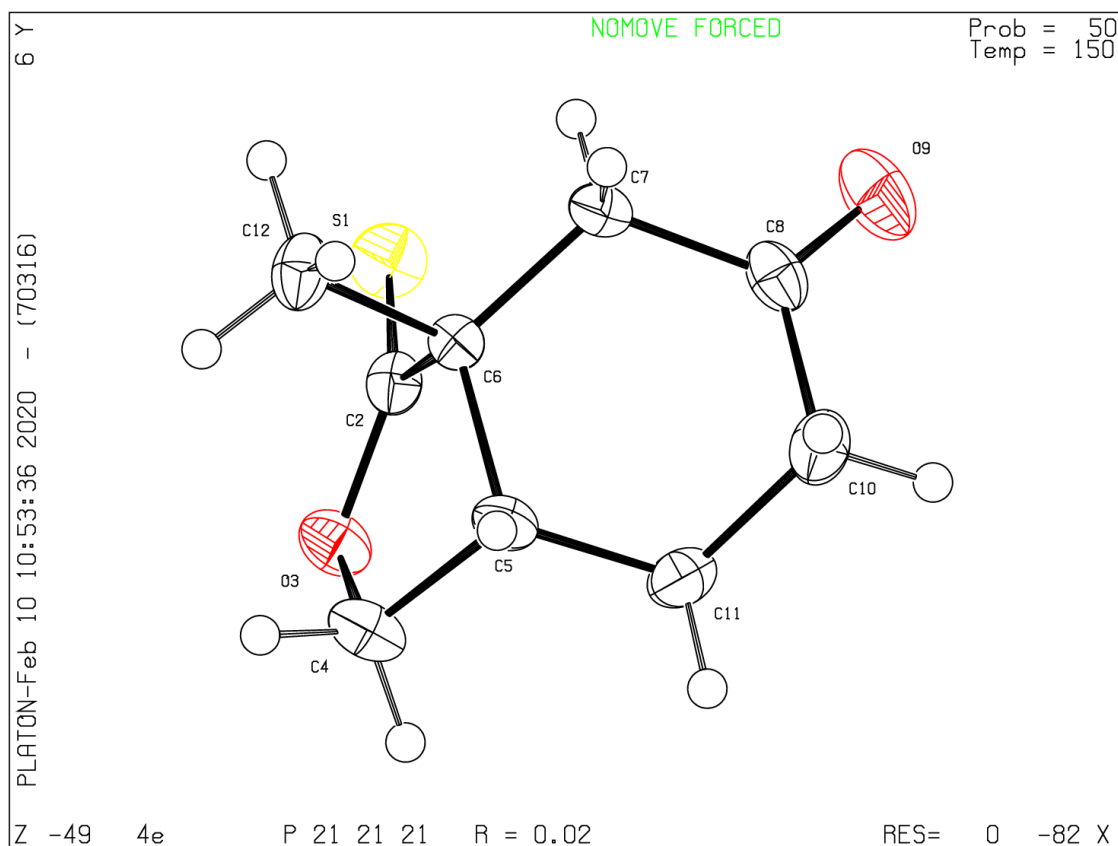

| Crystal data                       |                                                                     |
|------------------------------------|---------------------------------------------------------------------|
| Chemical formula                   | C <sub>9</sub> H <sub>12</sub> O <sub>2</sub> S                     |
| <i>M</i> <sub>r</sub>              | 184.26                                                              |
| Crystal system, space group        | Orthorhombic, <i>P</i> 2 <sub>1</sub> 2 <sub>1</sub> 2 <sub>1</sub> |
| Temperature (K)                    | 150                                                                 |
| <i>a</i> , <i>b</i> , <i>c</i> (Å) | 8.0589 (1), 9.1929 (1), 12.3333 (2)                                 |
| <i>V</i> (Å <sup>3</sup> )         | 913.71 (2)                                                          |
| <i>Z</i>                           | 4                                                                   |
| Radiation type                     | Cu <i>K</i> α                                                       |
| μ (mm <sup>-1</sup> )              | 2.80                                                                |
| Crystal size (mm)                  | 0.20 × 0.10 × 0.10                                                  |
| Data collection                    |                                                                     |
| Diffractometer                     | Oxford Diffraction SuperNova                                        |
| Absorption correction              | Multi-scan<br><i>CrysAlis PRO</i> (Rigaku Oxford Diffraction, 2017) |

|                                                                              |                                                   |
|------------------------------------------------------------------------------|---------------------------------------------------|
| $T_{\min}, T_{\max}$                                                         | 0.64, 0.76                                        |
| No. of measured, independent and observed [ $I > 2.0\sigma(I)$ ] reflections | 14164, 1919, 1910                                 |
| $R_{\text{int}}$                                                             | 0.024                                             |
| $(\sin \theta/\lambda)_{\text{max}}$ ( $\text{\AA}^{-1}$ )                   | 0.632                                             |
| Refinement                                                                   |                                                   |
| $R[F^2 > 2\sigma(F^2)], wR(F^2), S$                                          | 0.021, 0.058, 1.03                                |
| No. of reflections                                                           | 1919                                              |
| No. of parameters                                                            | 110                                               |
| H-atom treatment                                                             | H-atom parameters constrained                     |
| $\Delta\rho_{\text{max}}, \Delta\rho_{\text{min}}$ ( $\text{e \AA}^{-3}$ )   | 0.20, -0.17                                       |
| Absolute structure                                                           | Parsons, Flack & Wagner (2013), 785 Friedel Pairs |
| Absolute structure parameter                                                 | -0.009 (3)                                        |

Computer programs: SuperNova, (Oxford Diffraction, 2010), *CrysAlis PRO* (Rigaku Oxford Diffraction, 2017), *SUPERFLIP* (Palatinus & Chapuis, 2007), *CRYSTALS* (Betteridge *et al.*, 2003), *CAMERON* (Watkin *et al.*, 1996).

**Table 2**

**Selected geometric parameters ( $\text{\AA}, ^\circ$ )**

|           |             |            |             |
|-----------|-------------|------------|-------------|
| S1—C2     | 1.6260 (11) | C6—C7      | 1.5333 (14) |
| C2—O3     | 1.3329 (14) | C6—C12     | 1.5426 (14) |
| C2—C6     | 1.5216 (14) | C7—C8      | 1.5042 (15) |
| O3—C4     | 1.4706 (14) | C8—O9      | 1.2122 (15) |
| C4—C5     | 1.5178 (15) | C8—C10     | 1.5028 (16) |
| C5—C6     | 1.5422 (14) | C10—C11    | 1.5249 (17) |
| C5—C11    | 1.5290 (16) |            |             |
| S1—C2—O3  | 121.15 (9)  | C2—C6—C7   | 114.24 (9)  |
| S1—C2—C6  | 129.19 (8)  | C5—C6—C12  | 111.30 (9)  |
| O3—C2—C6  | 109.63 (9)  | C2—C6—C12  | 106.86 (8)  |
| C2—O3—C4  | 110.43 (8)  | C7—C6—C12  | 108.60 (8)  |
| O3—C4—C5  | 103.93 (9)  | C6—C7—C8   | 115.71 (9)  |
| C4—C5—C6  | 101.09 (9)  | C7—C8—O9   | 121.70 (11) |
| C4—C5—C11 | 110.47 (10) | C7—C8—C10  | 115.44 (10) |
| C6—C5—C11 | 112.26 (9)  | O9—C8—C10  | 122.83 (12) |
| C5—C6—C2  | 100.35 (8)  | C8—C10—C11 | 110.18 (10) |
| C5—C6—C7  | 115.08 (9)  | C5—C11—C10 | 112.23 (10) |

**Alert level C**

[PLAT230 ALERT 2 C](#) Hirshfeld Test Diff for S1 --C2 .  
6.4 s.u.



● **Alert level G**

[PLAT791 ALERT 4 G](#) Model has Chirality at C5 (Chiral SPGR)

S Verify

[PLAT791 ALERT 4 G](#) Model has Chirality at C6 (Chiral SPGR)

R Verify

---

## **2.2 Copies of NMR Spectra**

# <sup>1</sup>H NMR (500 MHz, CDCl<sub>3</sub>) of S1

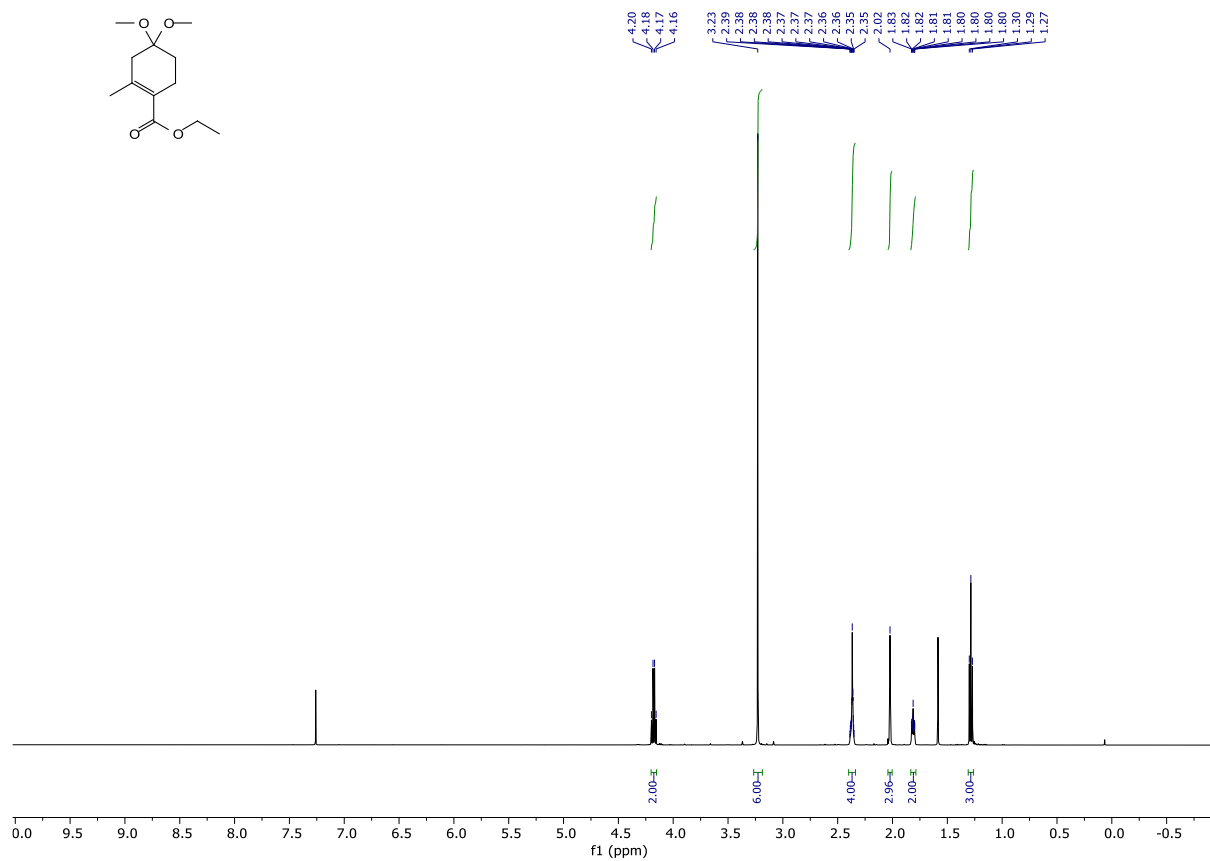

# <sup>13</sup>C NMR (126 MHz, CDCl<sub>3</sub>) of S1

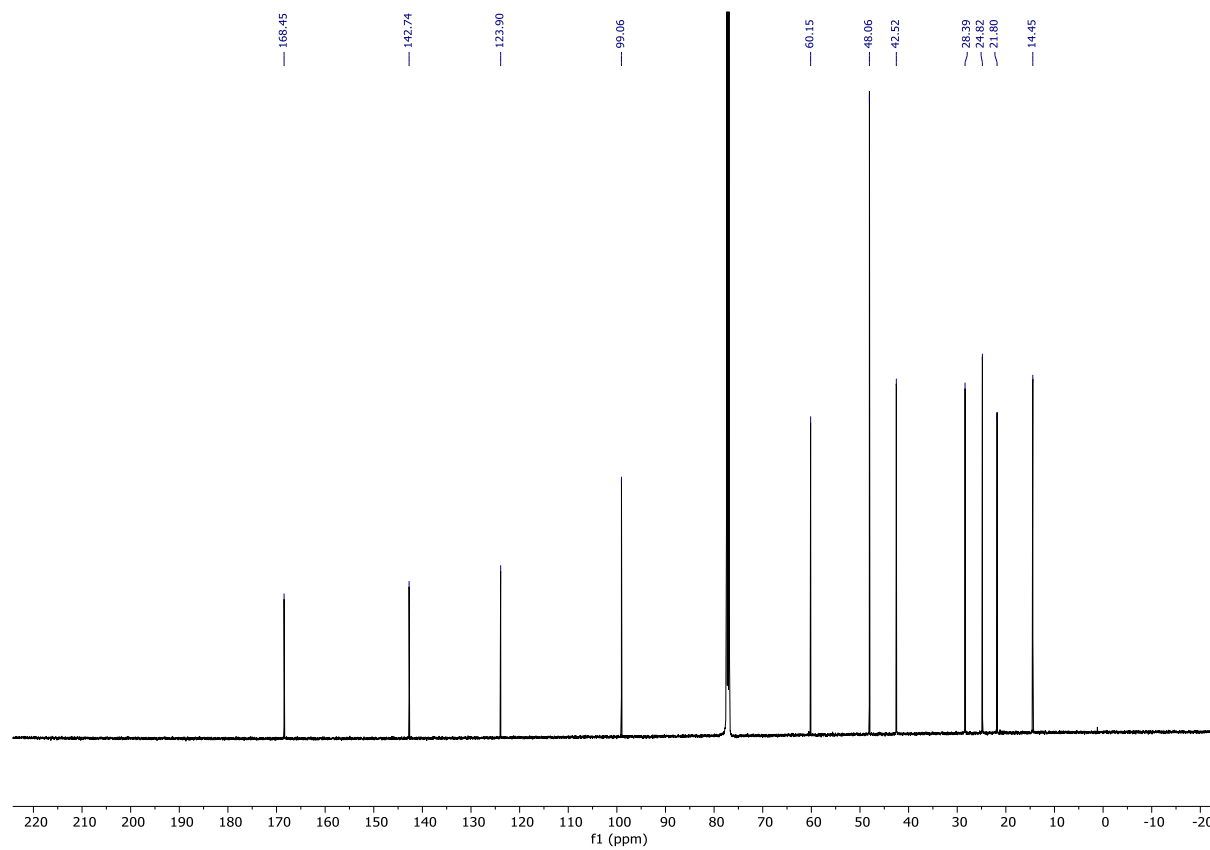

# <sup>1</sup>H NMR (400 MHz, CDCl<sub>3</sub>) of S2

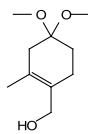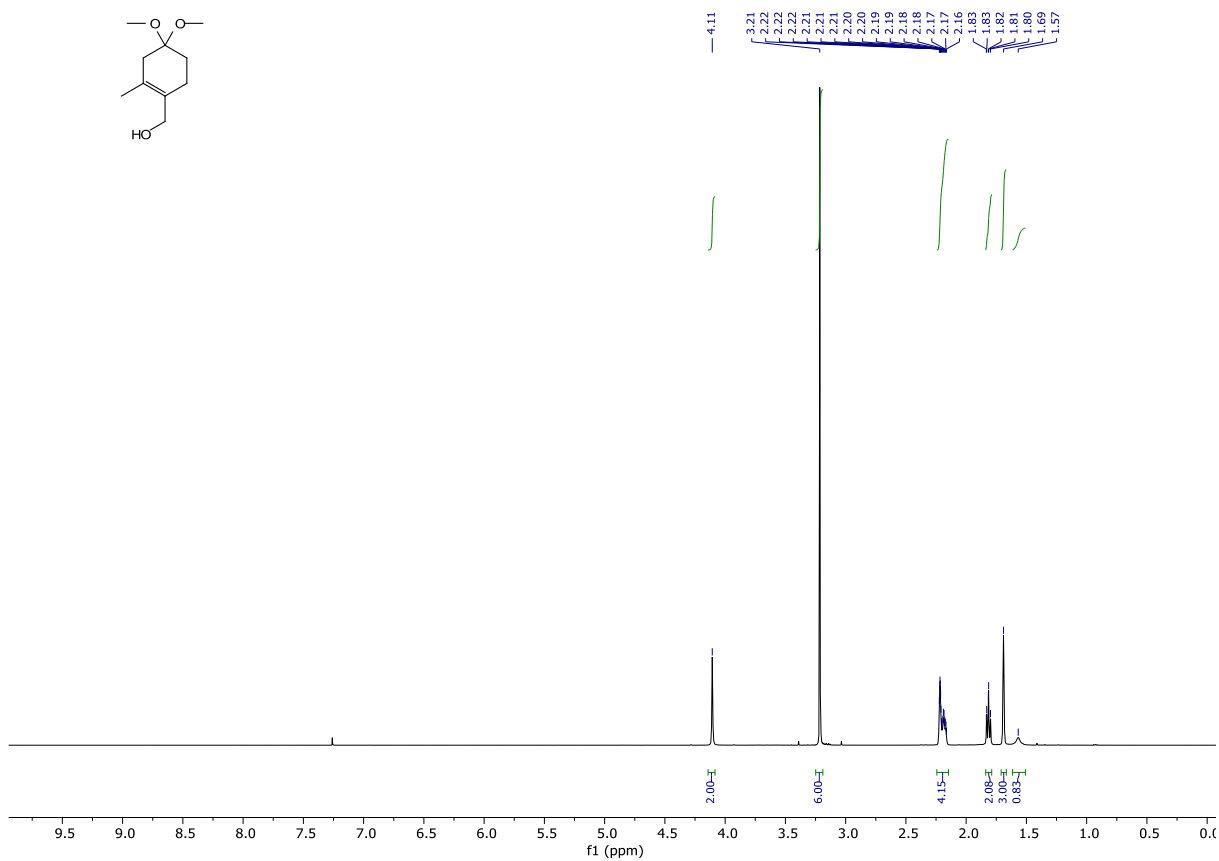

# <sup>13</sup>C NMR (101 MHz, CDCl<sub>3</sub>) of S2

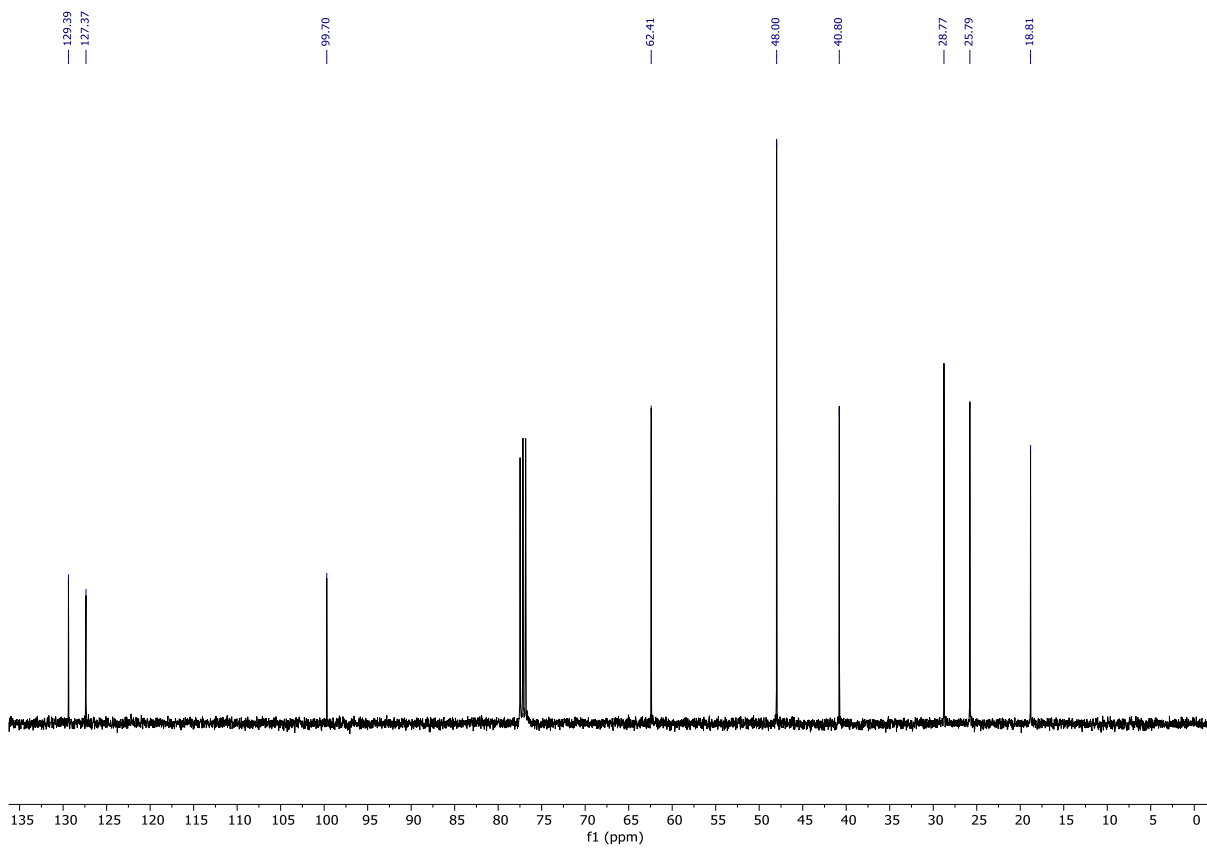

### $^1\text{H}$ NMR (400 MHz, $\text{CDCl}_3$ ) of S3

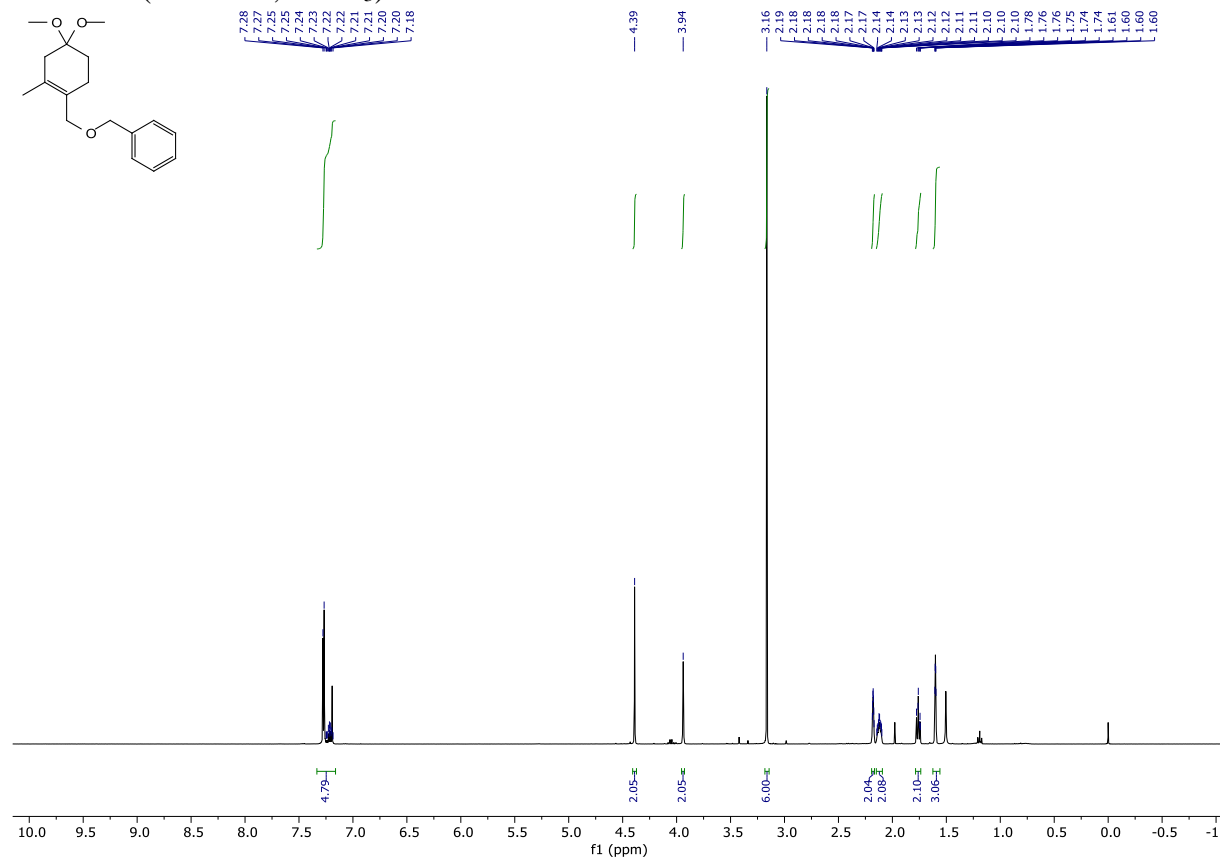

### $^{13}\text{C}$ NMR (101 MHz, $\text{CDCl}_3$ ) of S3

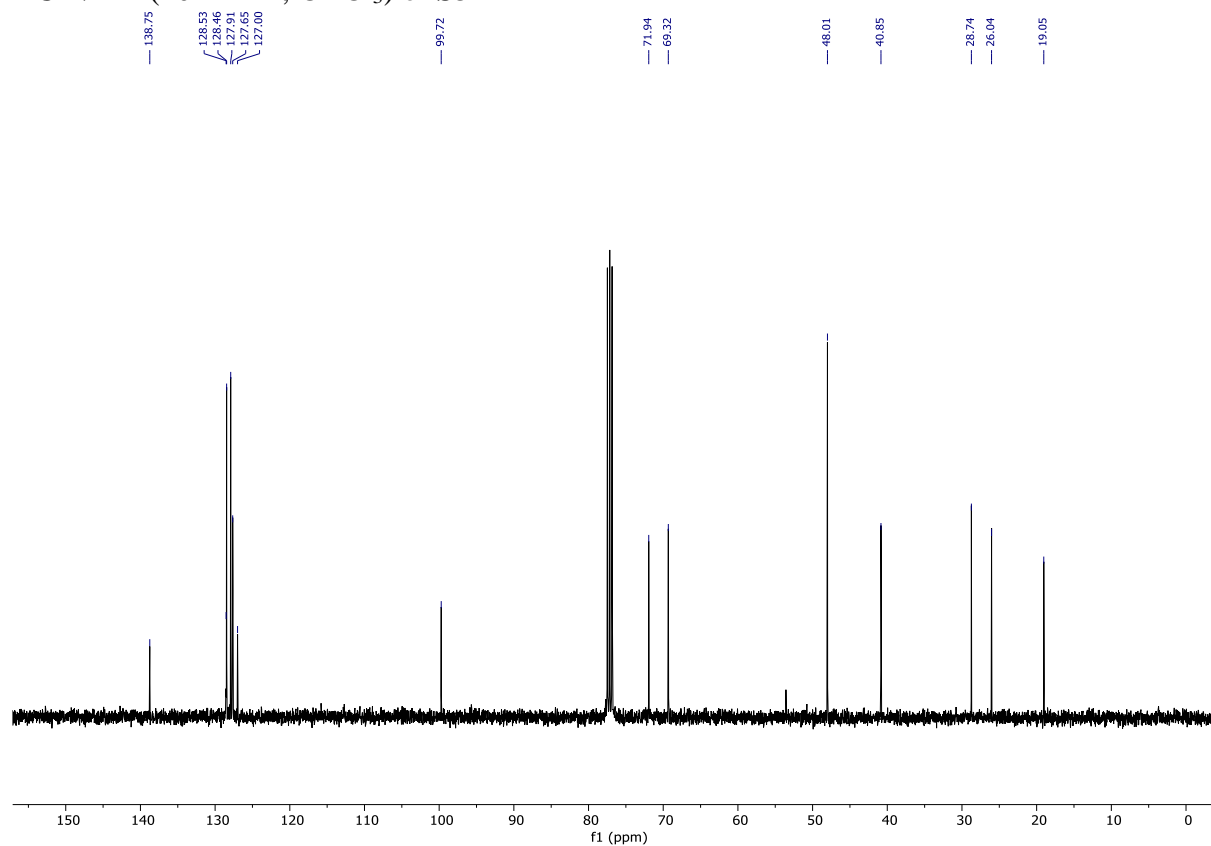

# <sup>1</sup>H NMR (500 MHz, Benzene-*d*<sub>6</sub>) of S4

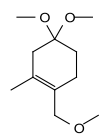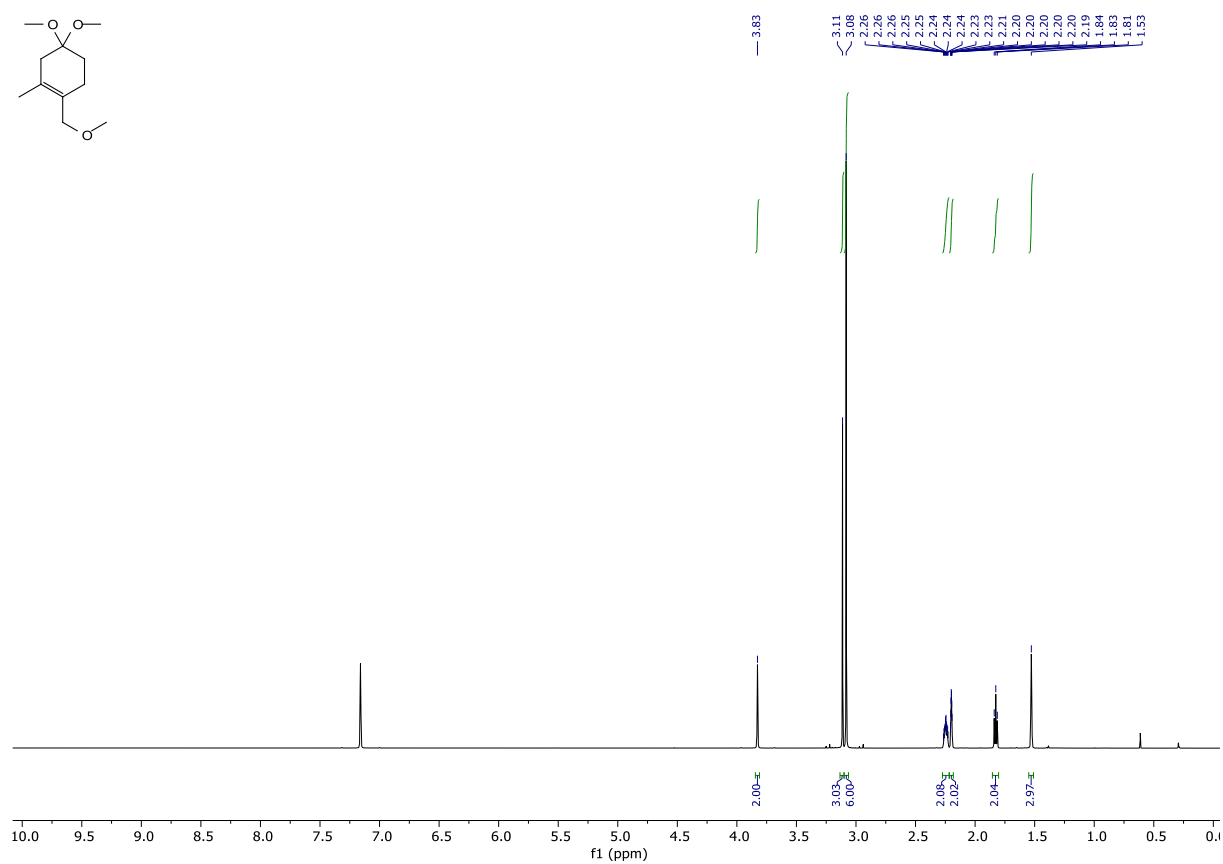

# <sup>13</sup>C NMR (126 MHz, Benzene-*d*<sub>6</sub>) of S4

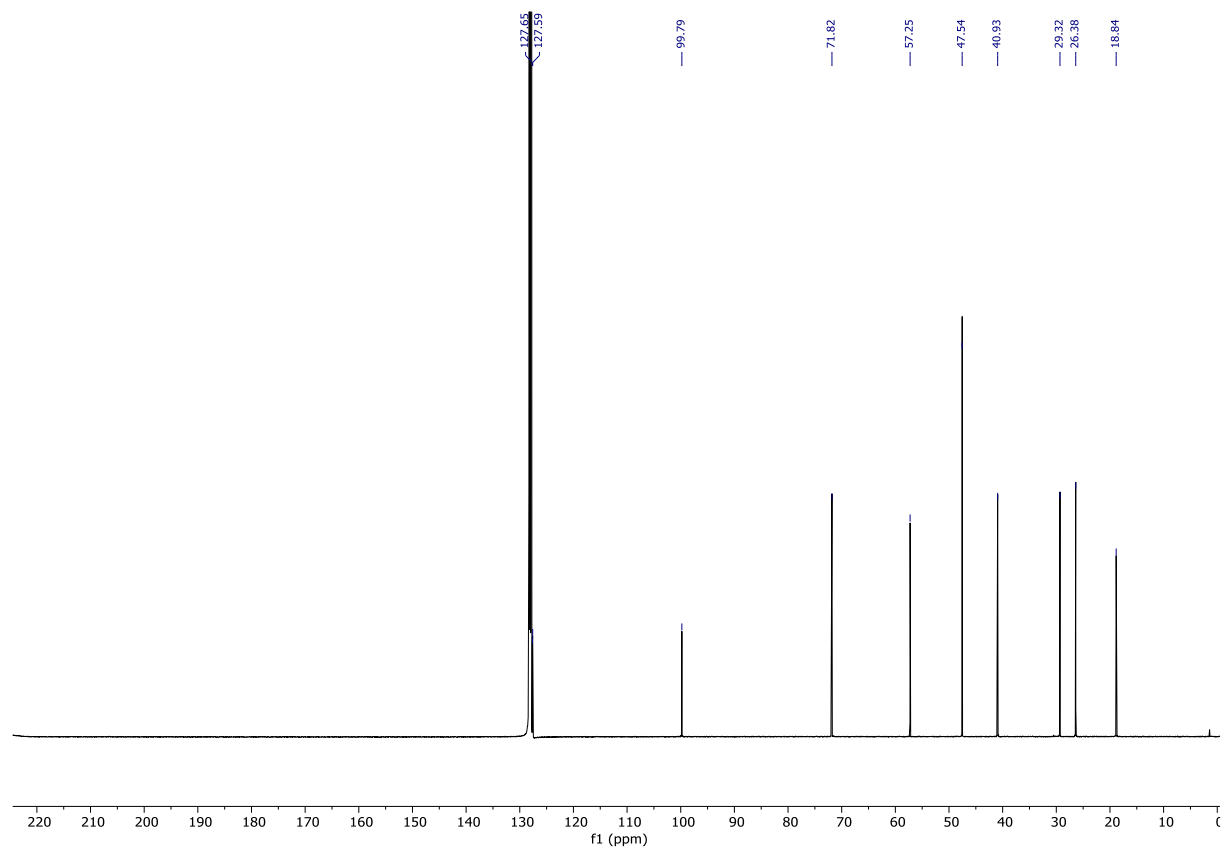

**<sup>1</sup>H NMR (500 MHz, Acetone-*d*<sub>6</sub>) of S5**

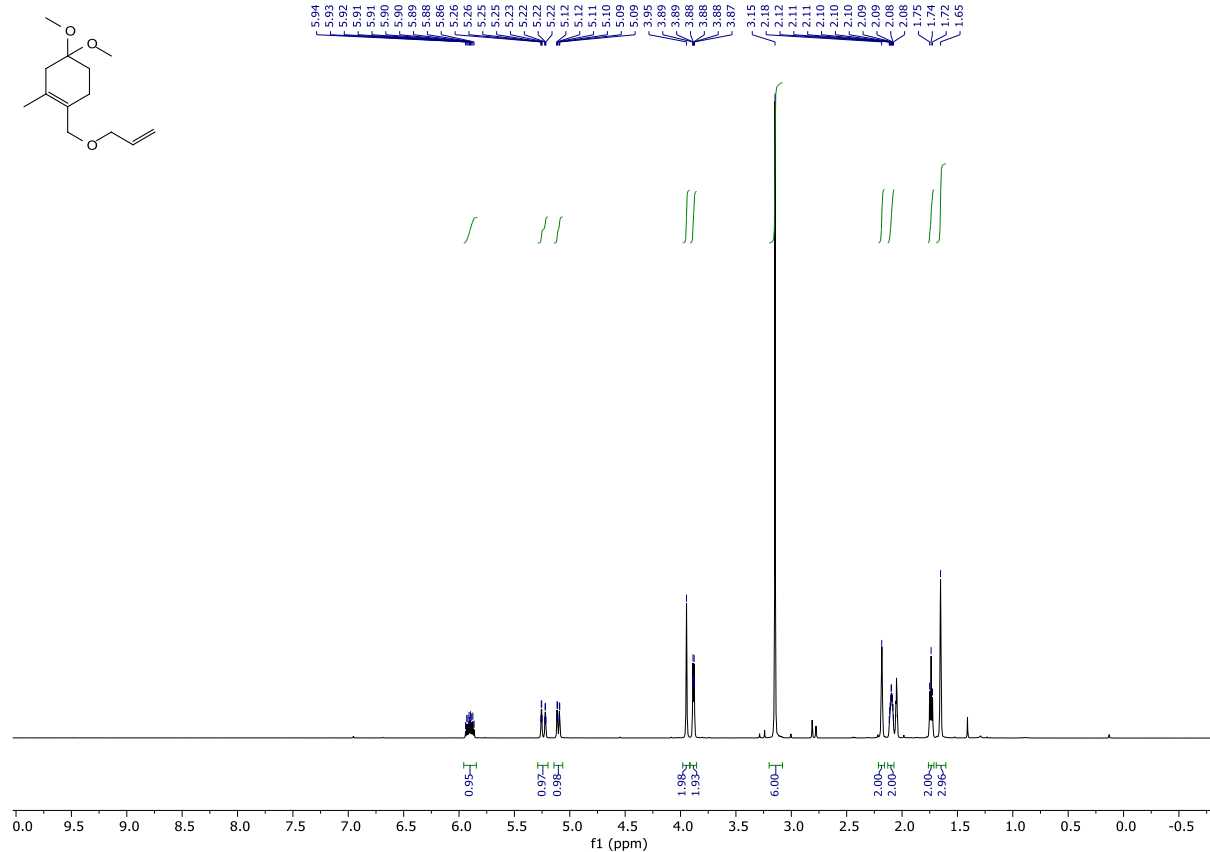

**<sup>13</sup>C NMR (126 MHz, Acetone-*d*<sub>6</sub>) of S5**

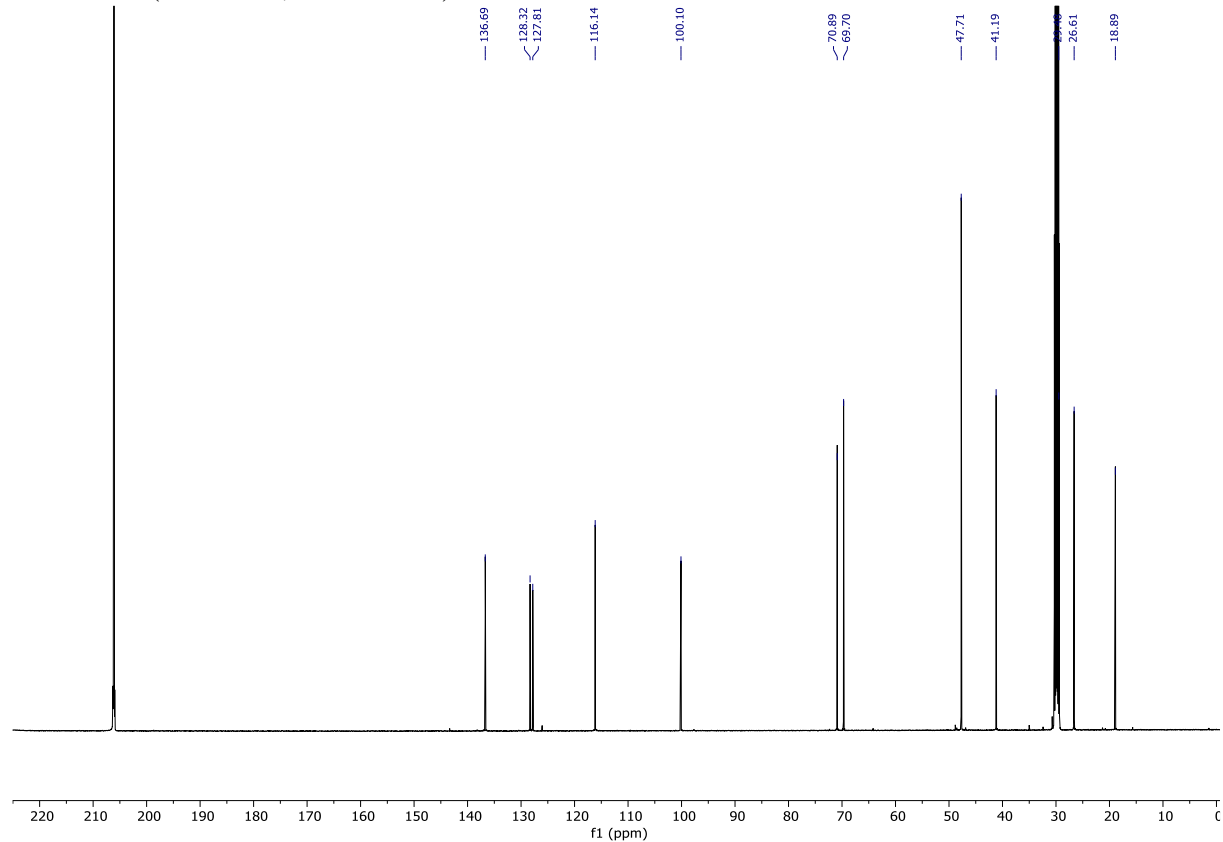

**<sup>1</sup>H NMR (600 MHz, Benzene-*d*<sub>6</sub>) of S6**

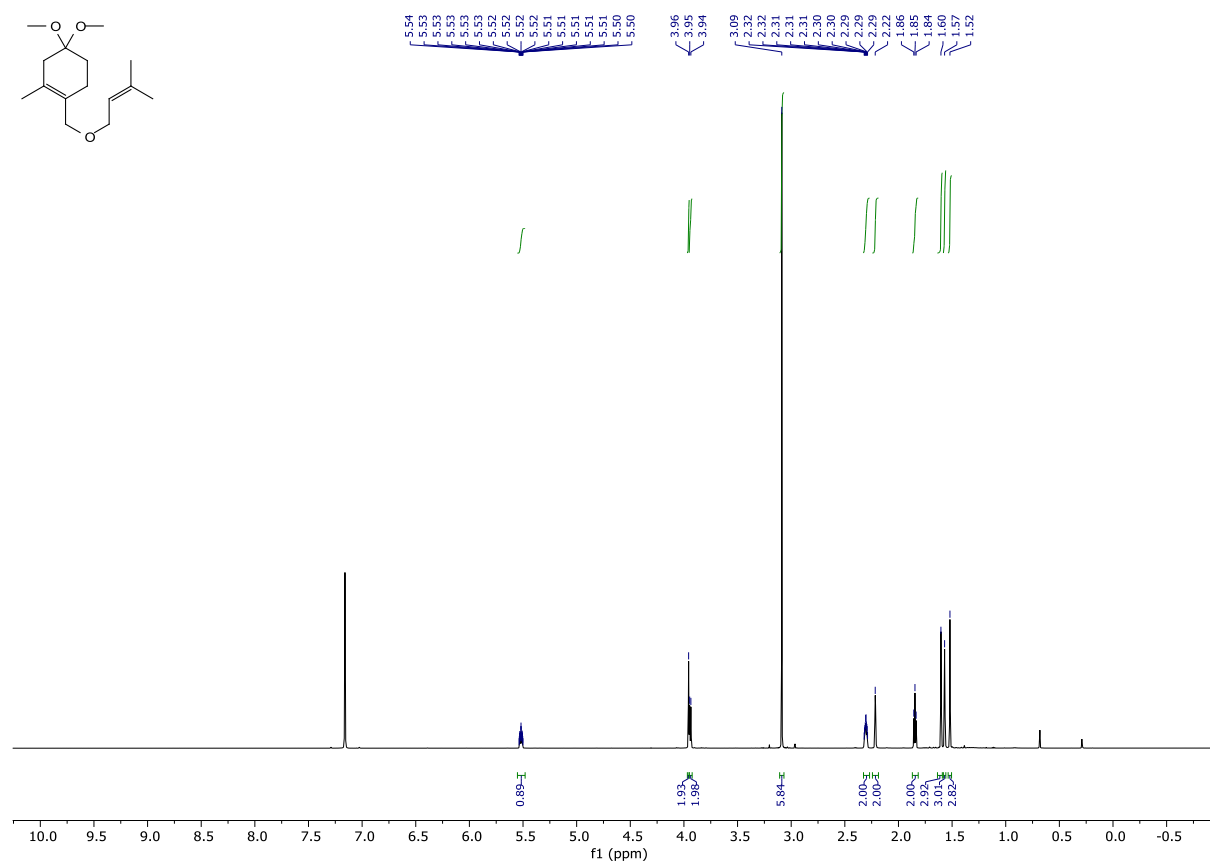

**<sup>13</sup>C NMR (151 MHz, Benzene-*d*<sub>6</sub>) of S6**

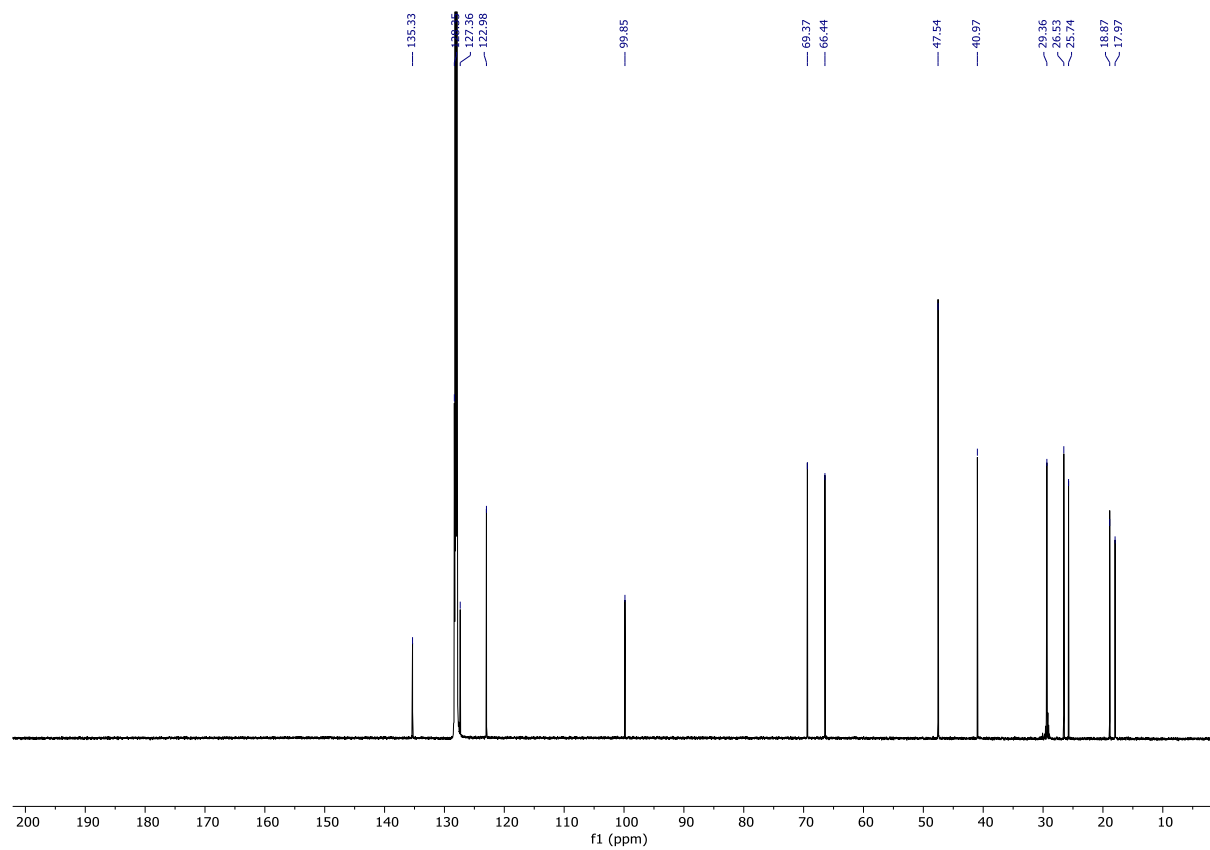



# <sup>1</sup>H NMR (500 MHz, Acetone-d<sub>6</sub>) of S7

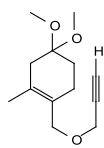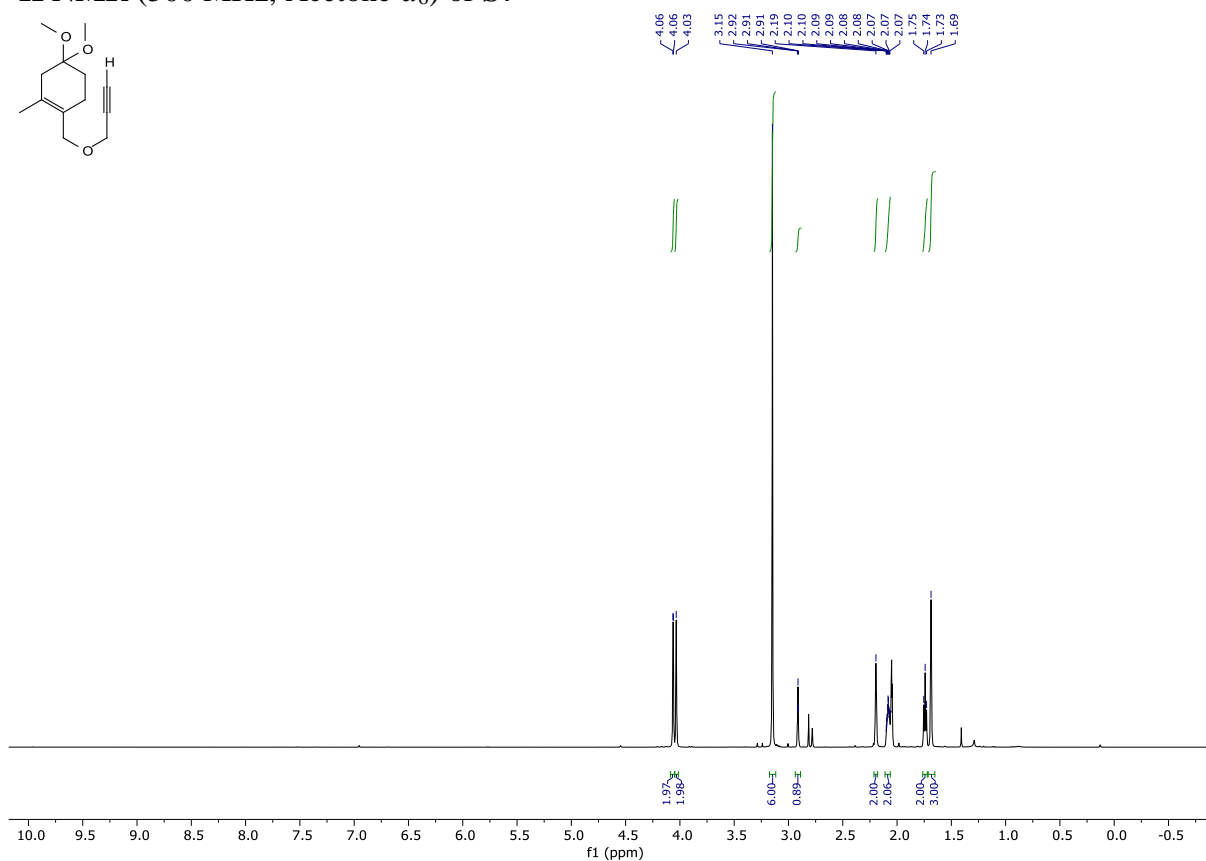

# <sup>13</sup>C NMR (126 MHz, Acetone-d<sub>6</sub>) of S7

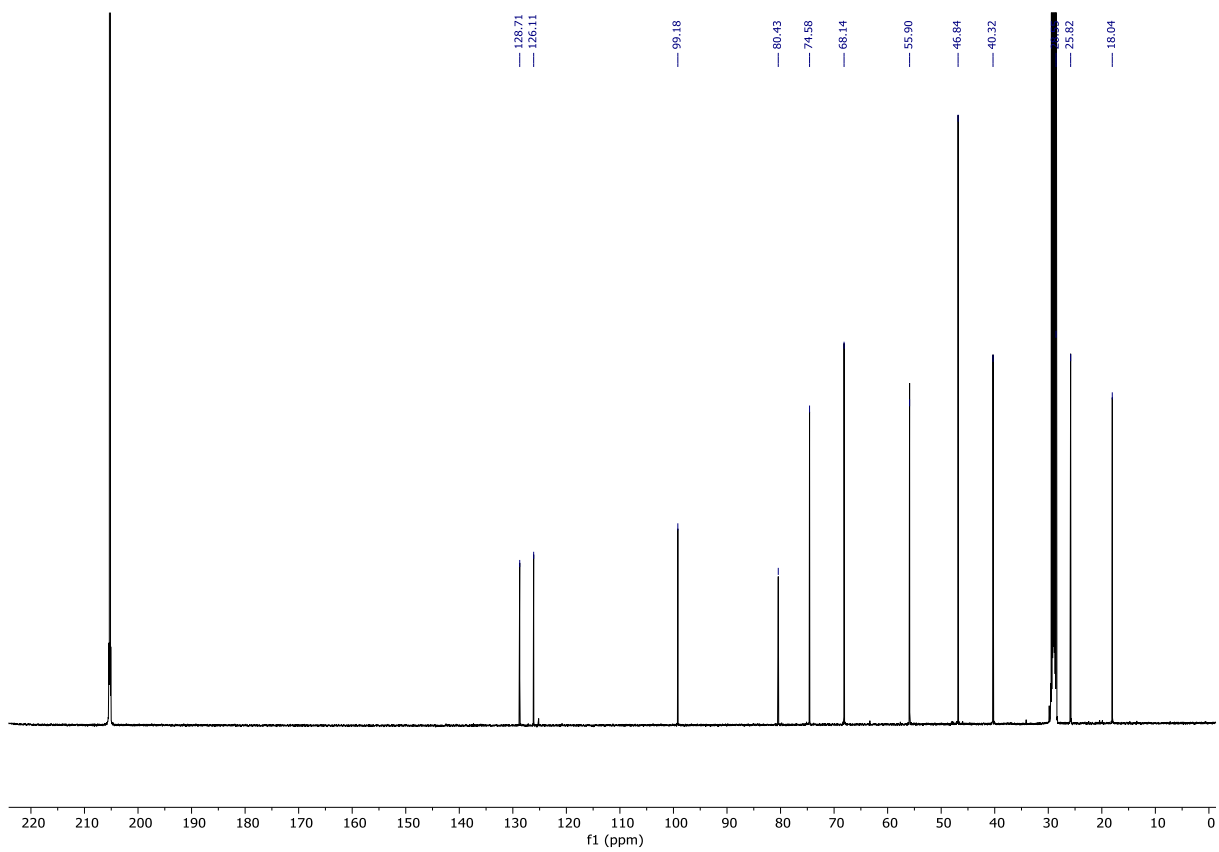

**<sup>1</sup>H NMR (500 MHz, Acetone-*d*<sub>6</sub>) of S8**

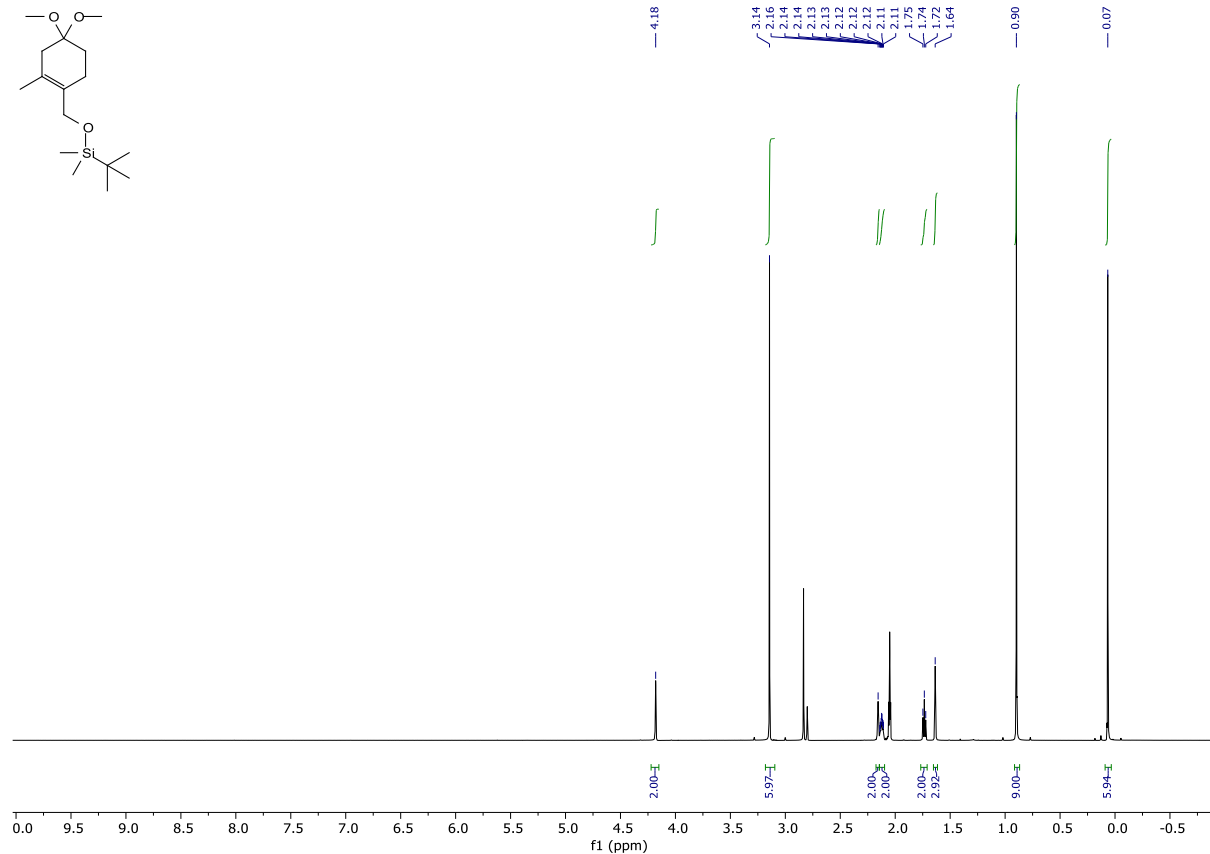

**<sup>13</sup>C NMR (126 MHz, Acetone-*d*<sub>6</sub>) of S8**

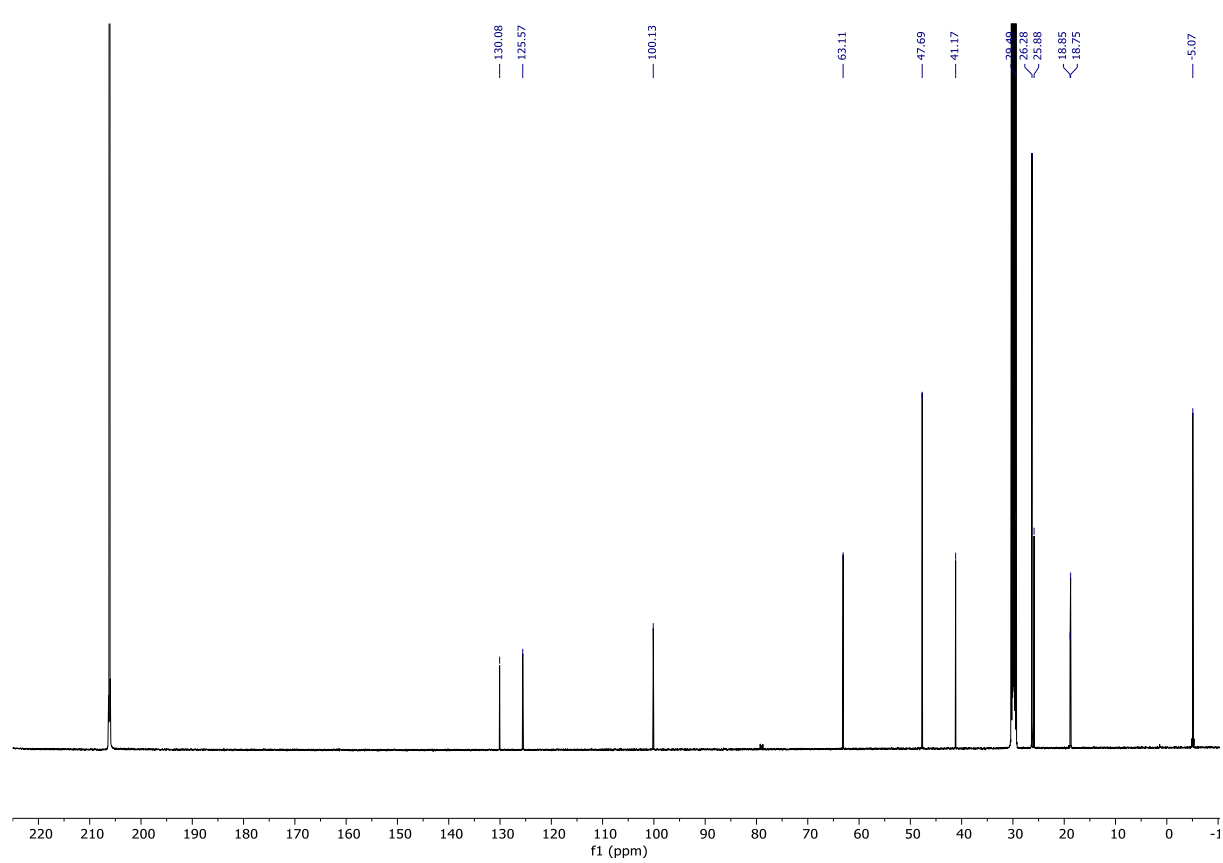

### $^1\text{H}$ NMR (400 MHz, Benzene- $d_6$ ) of **S9**

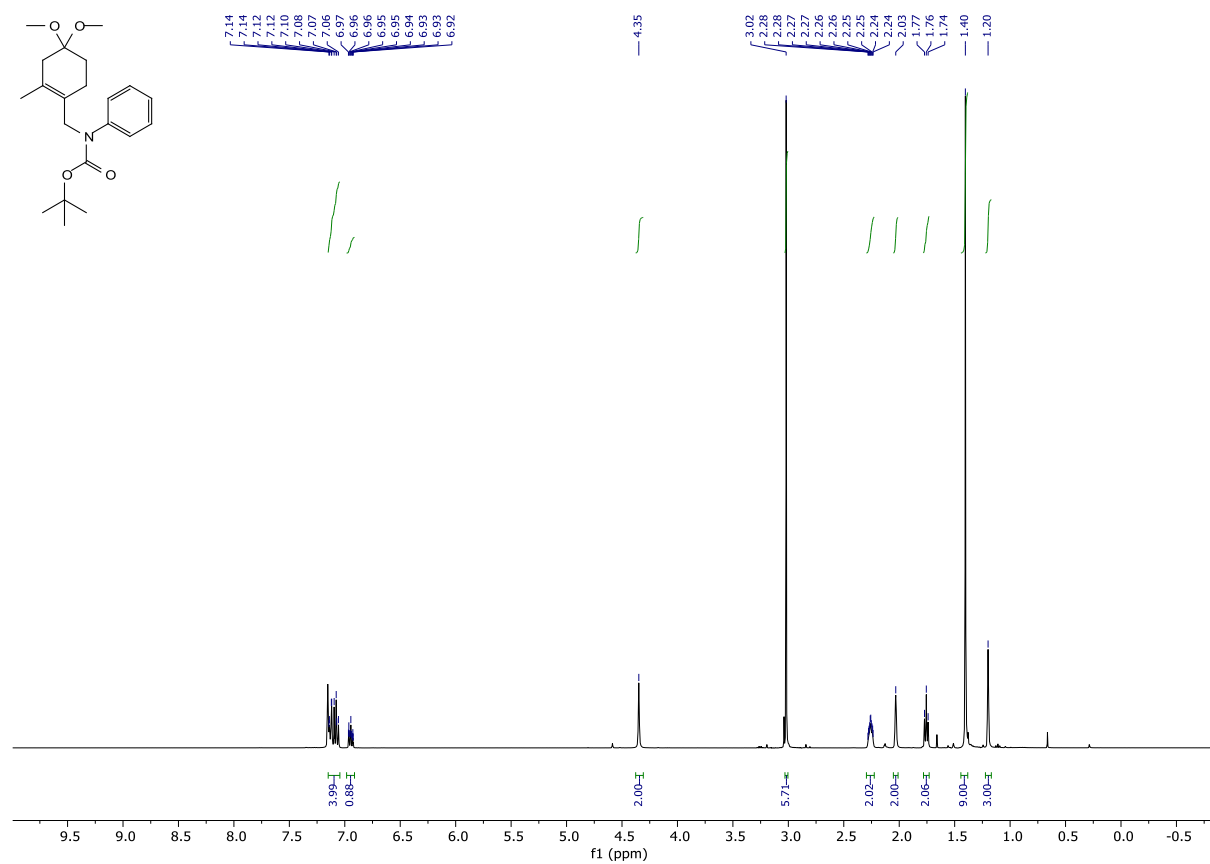

### $^{13}\text{C}$ NMR (101 MHz, Benzene- $d_6$ ) of **S9**

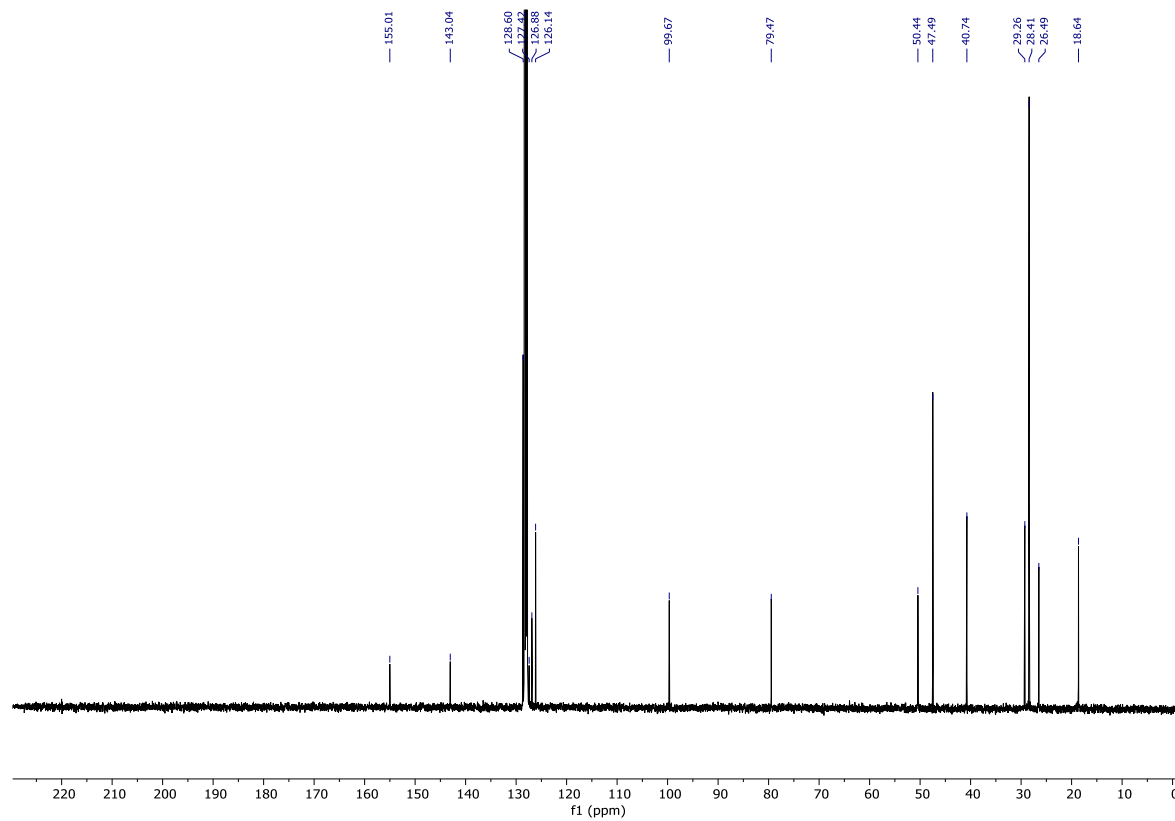

# <sup>1</sup>H NMR (500 MHz, Acetone-*d*<sub>6</sub>) of S10

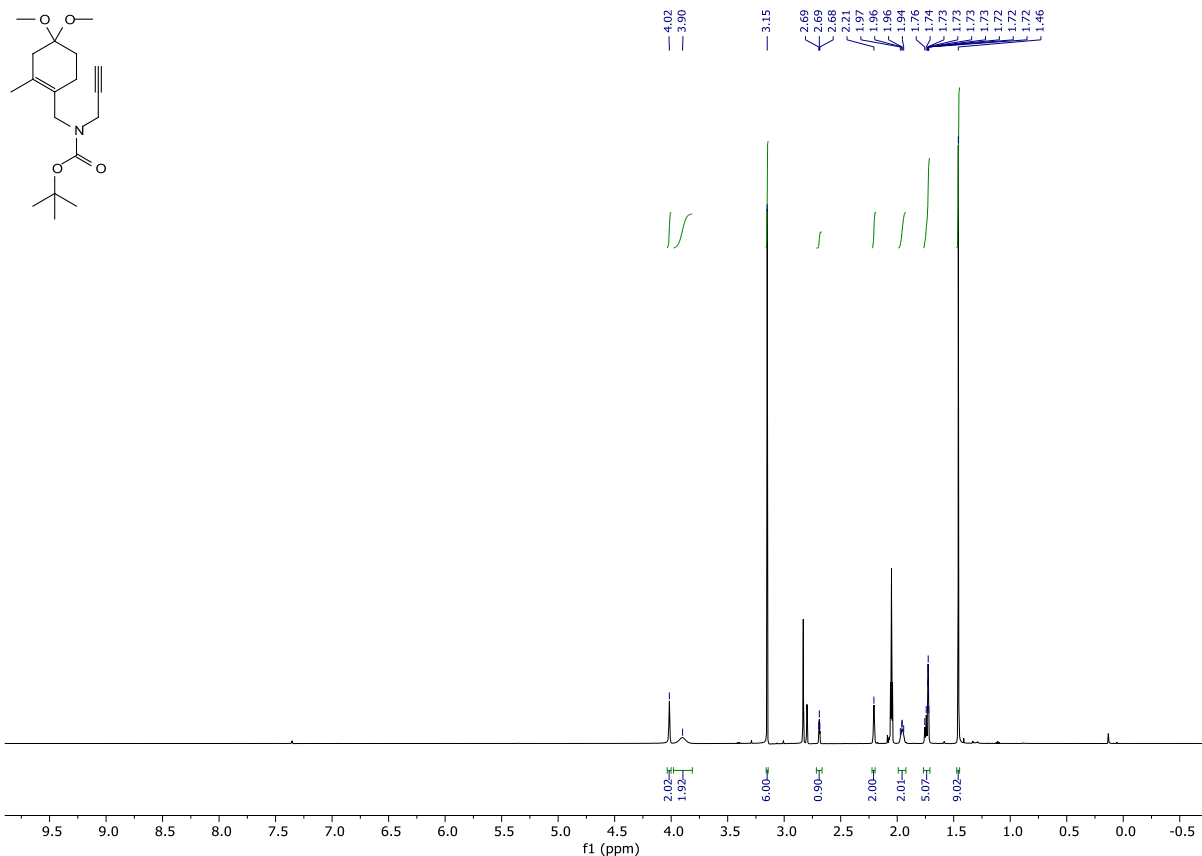

# <sup>13</sup>C NMR (126 MHz, Acetone-*d*<sub>6</sub>) of S10

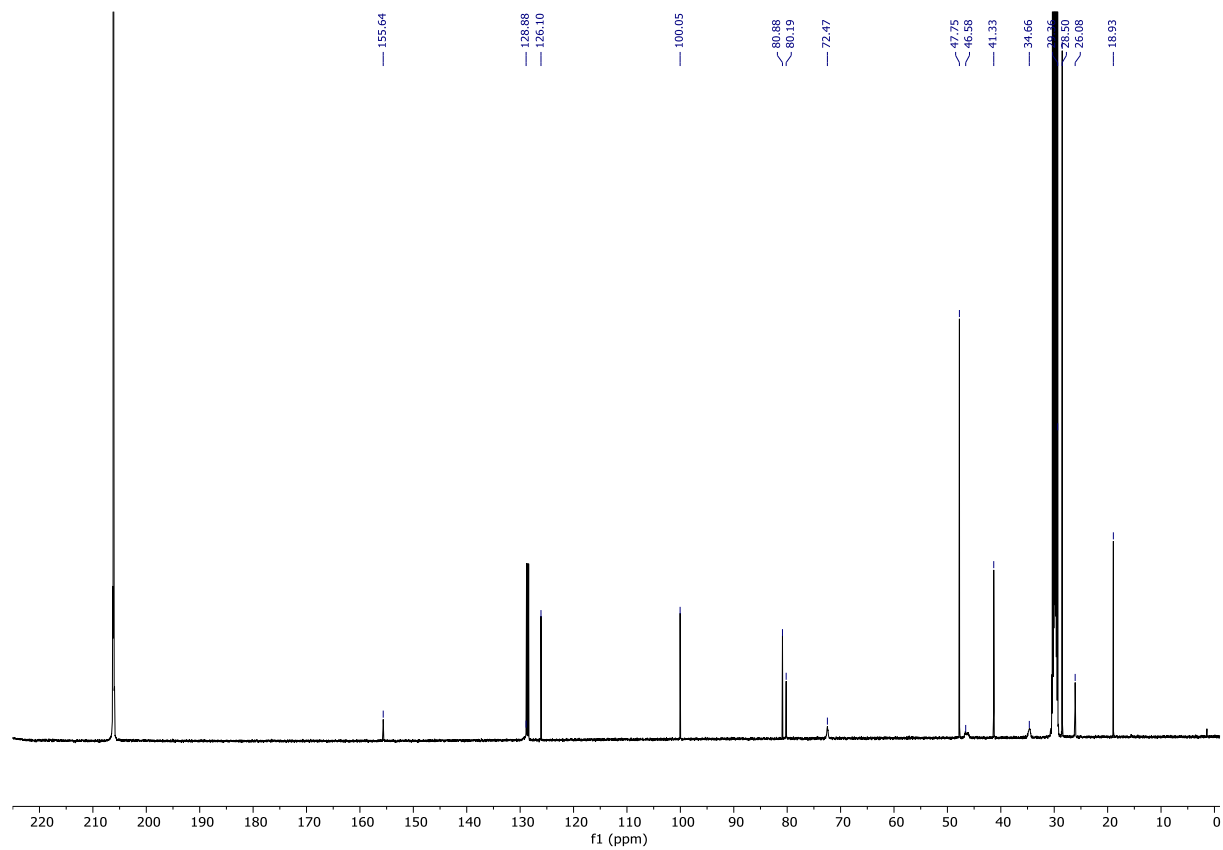

**<sup>1</sup>H NMR (400 MHz, Acetone-*d*<sub>6</sub>) of S12**

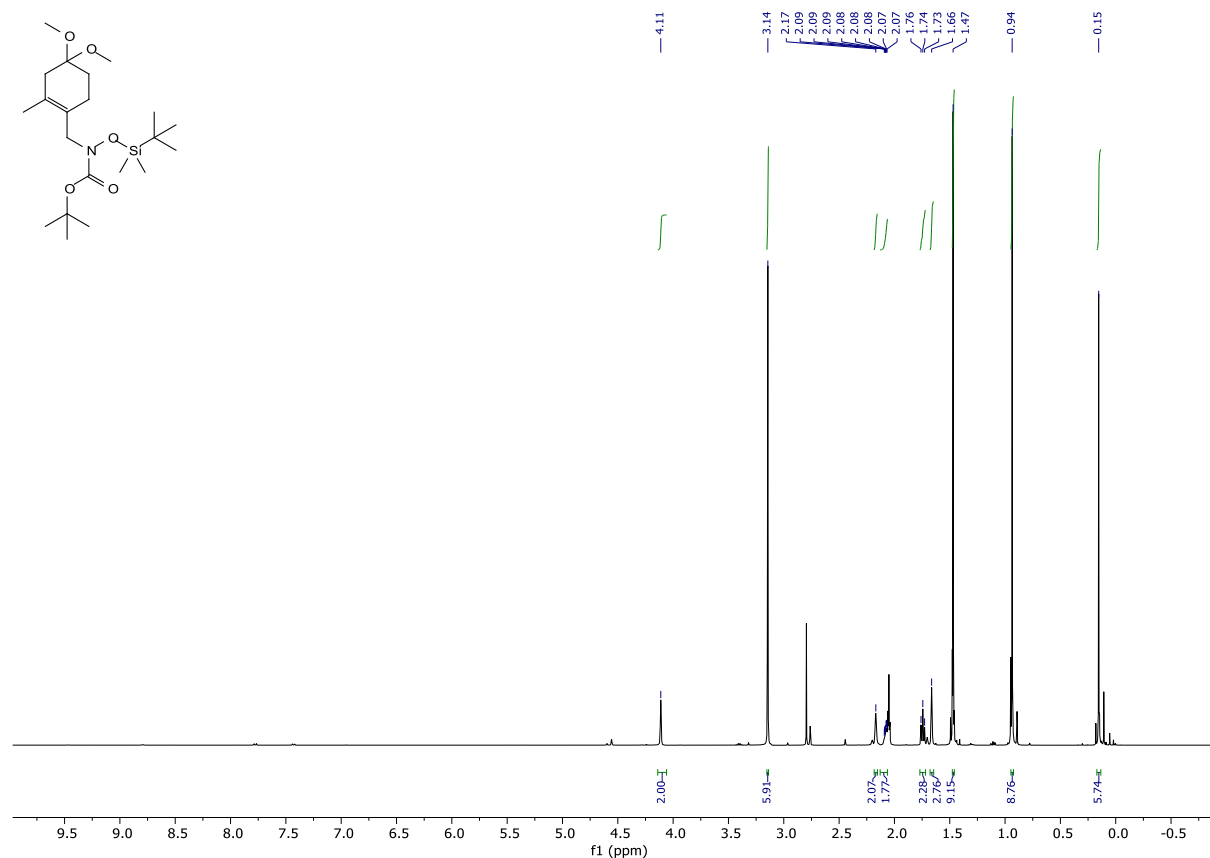

**<sup>13</sup>C NMR (126 MHz, Acetone-*d*<sub>6</sub>) of S12**

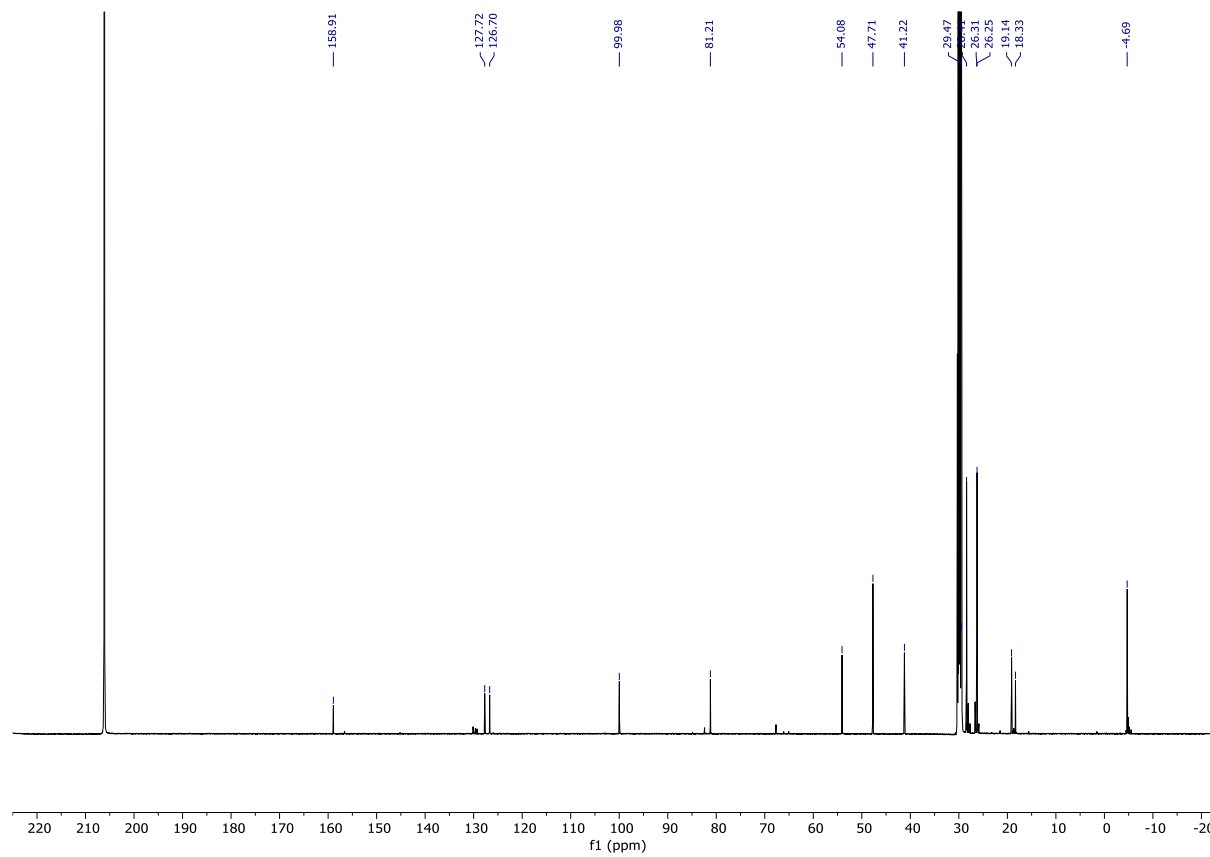

**<sup>1</sup>H NMR (500 MHz, Acetone-*d*<sub>6</sub>) of S13**

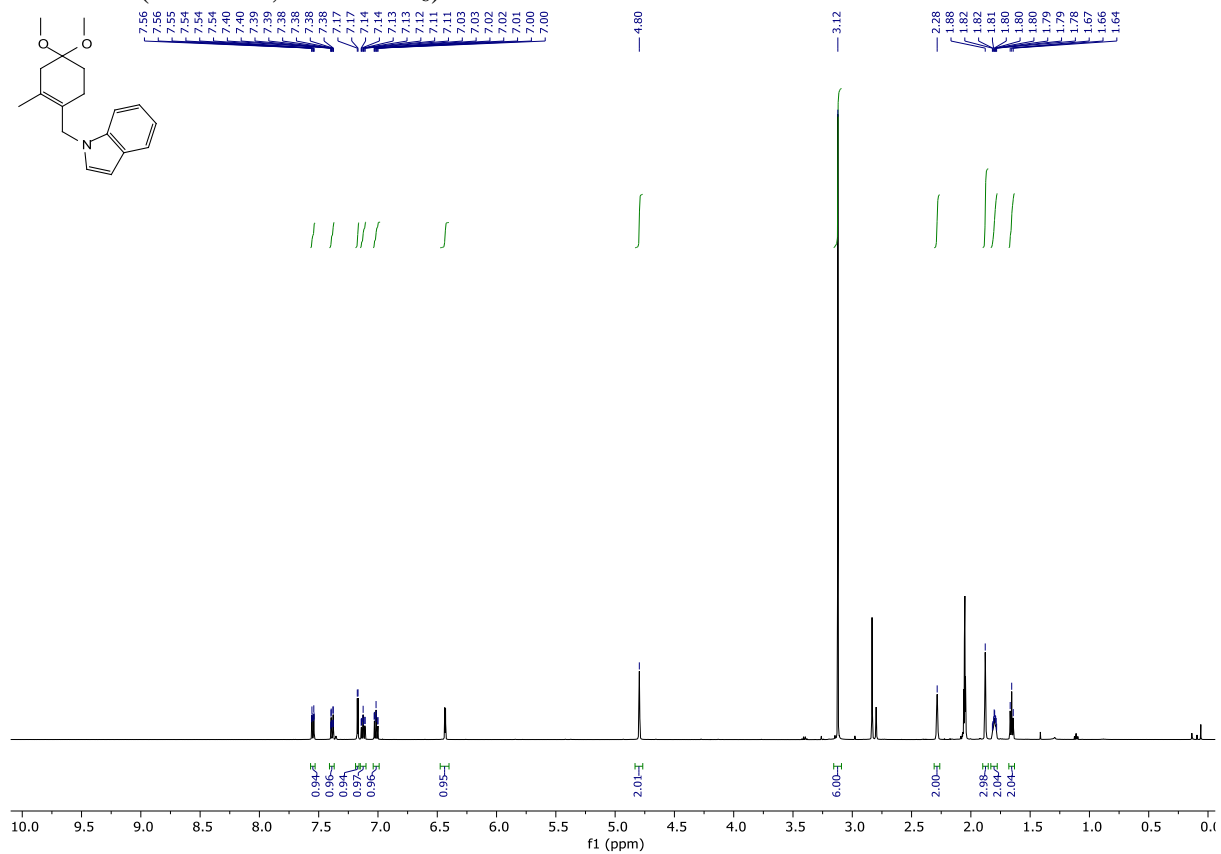

**<sup>13</sup>C NMR (126 MHz, Acetone-*d*<sub>6</sub>) of S13**

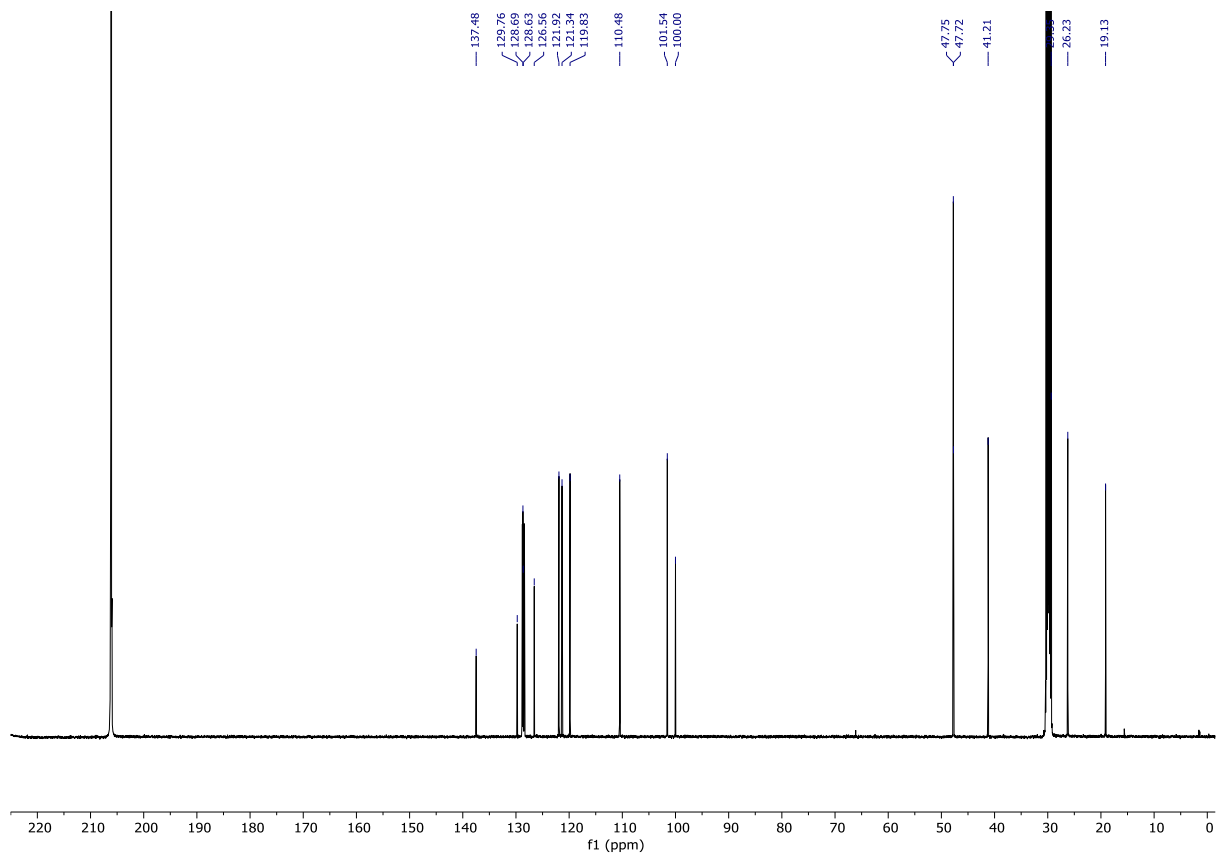

# <sup>1</sup>H NMR (400 MHz, Benzene-d<sub>6</sub>) of S14

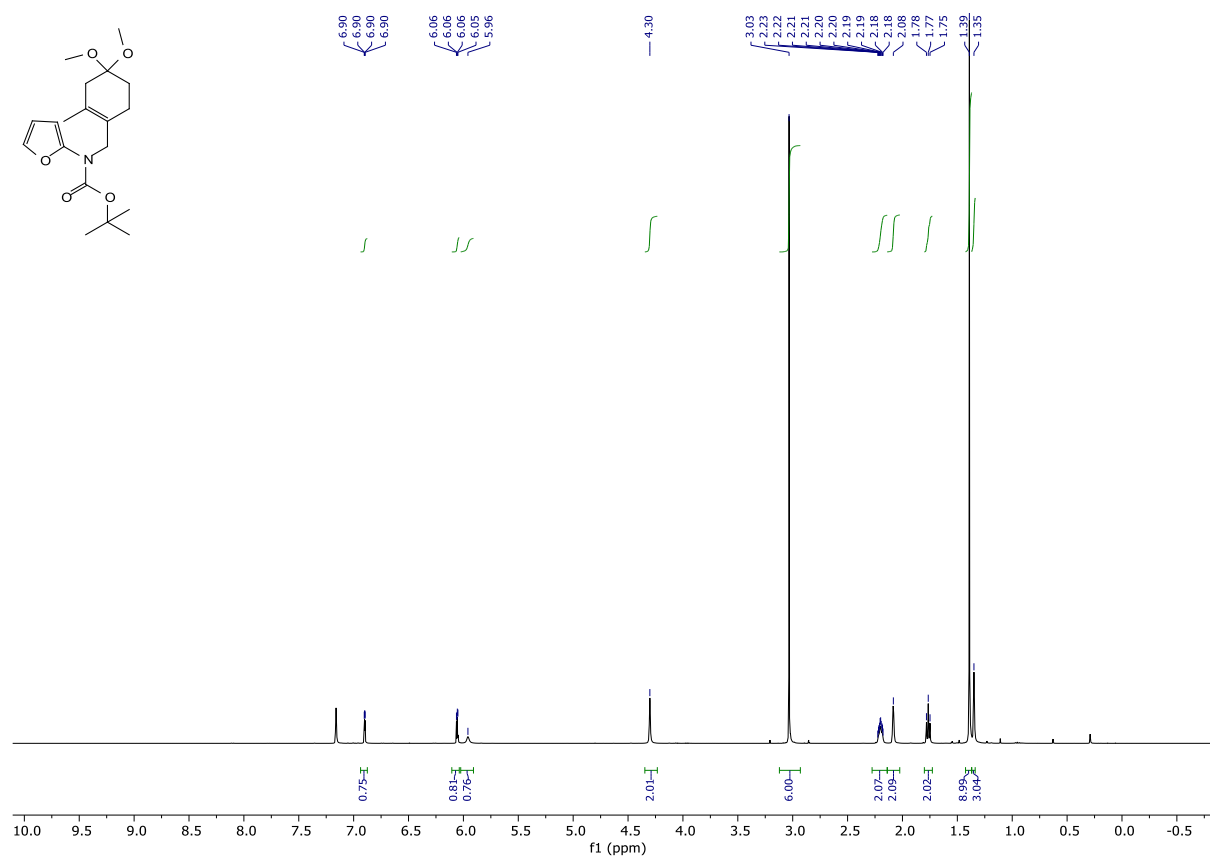

# <sup>13</sup>C NMR (101 MHz, Benzene-d<sub>6</sub>) of S14

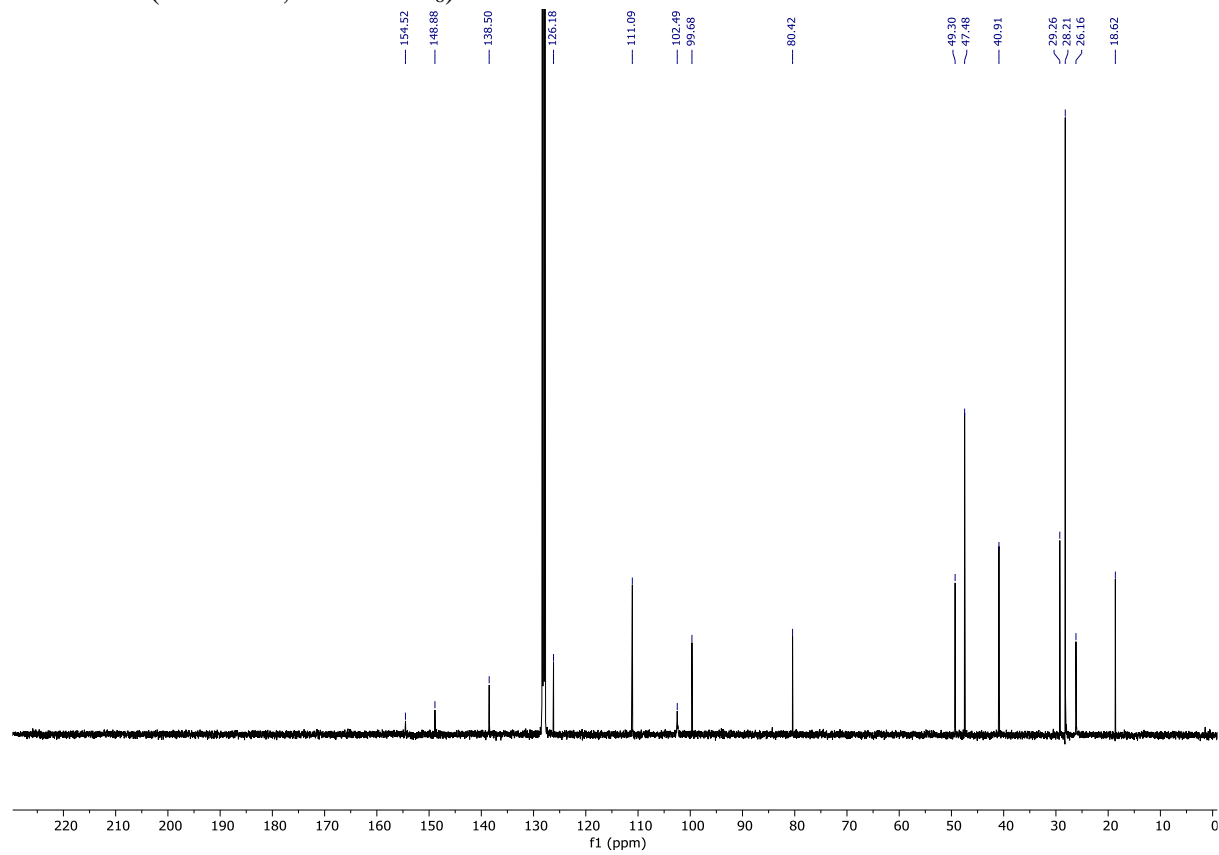

# <sup>1</sup>H NMR (500 MHz, Acetone-*d*<sub>6</sub>) of S15

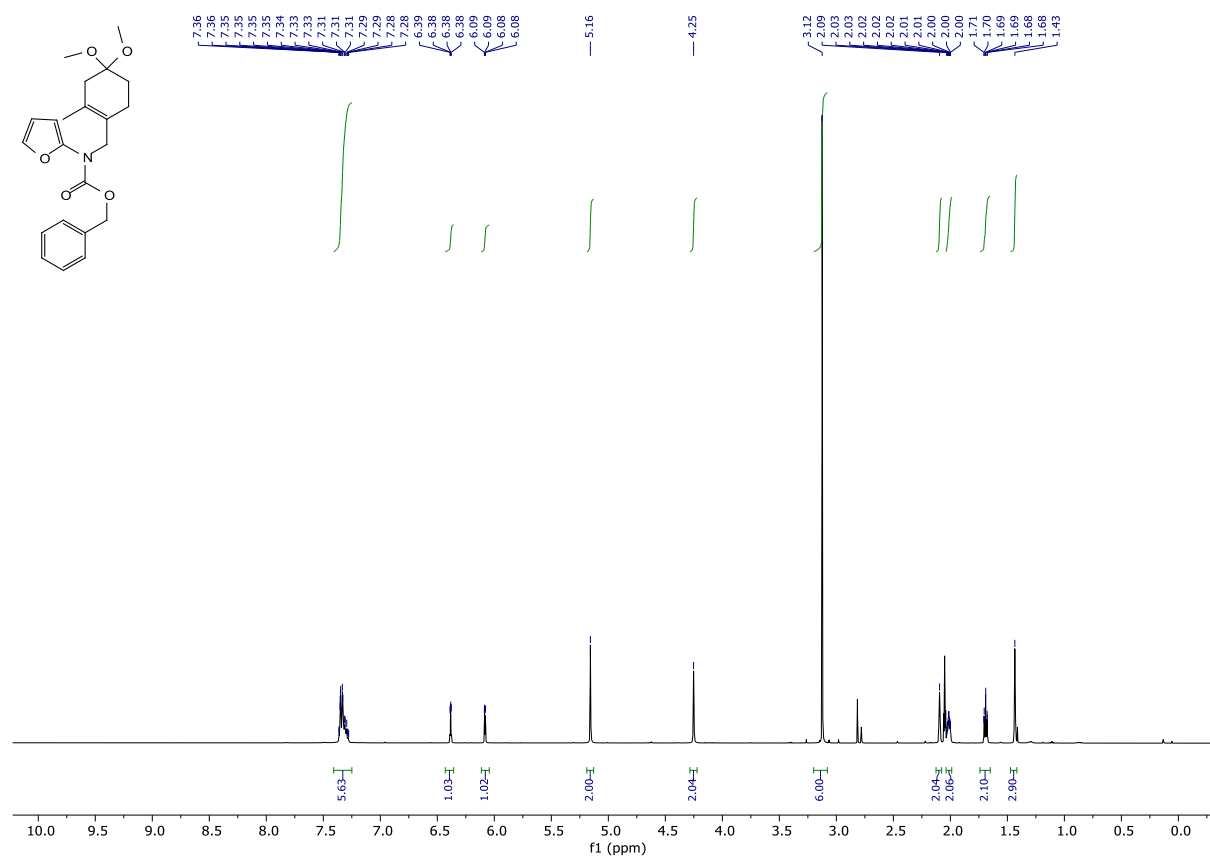

# <sup>13</sup>C NMR (126 MHz, Acetone-*d*<sub>6</sub>) of S15

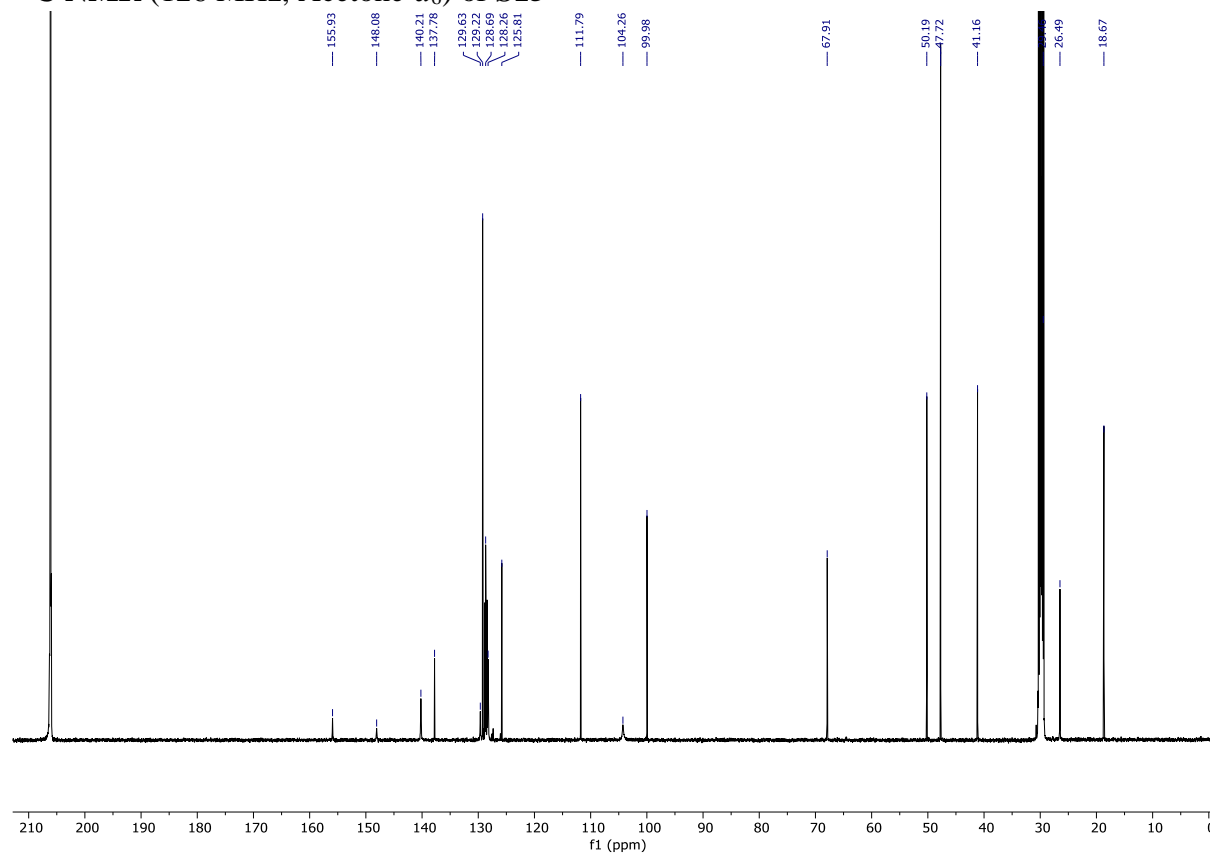



### $^1\text{H}$ NMR (400 MHz, $\text{CDCl}_3$ ) of **1a**

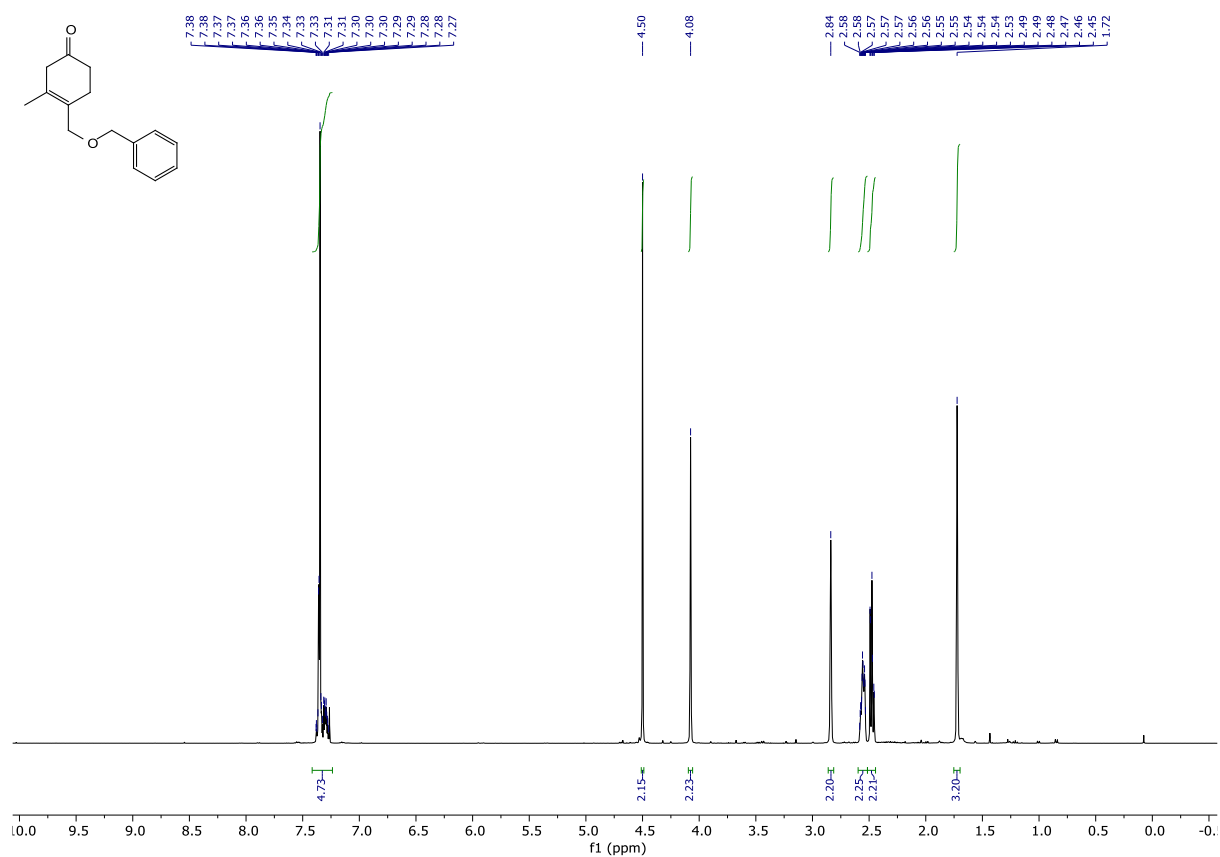

### $^{13}\text{C}$ NMR (101 MHz, $\text{CDCl}_3$ ) of **1a**

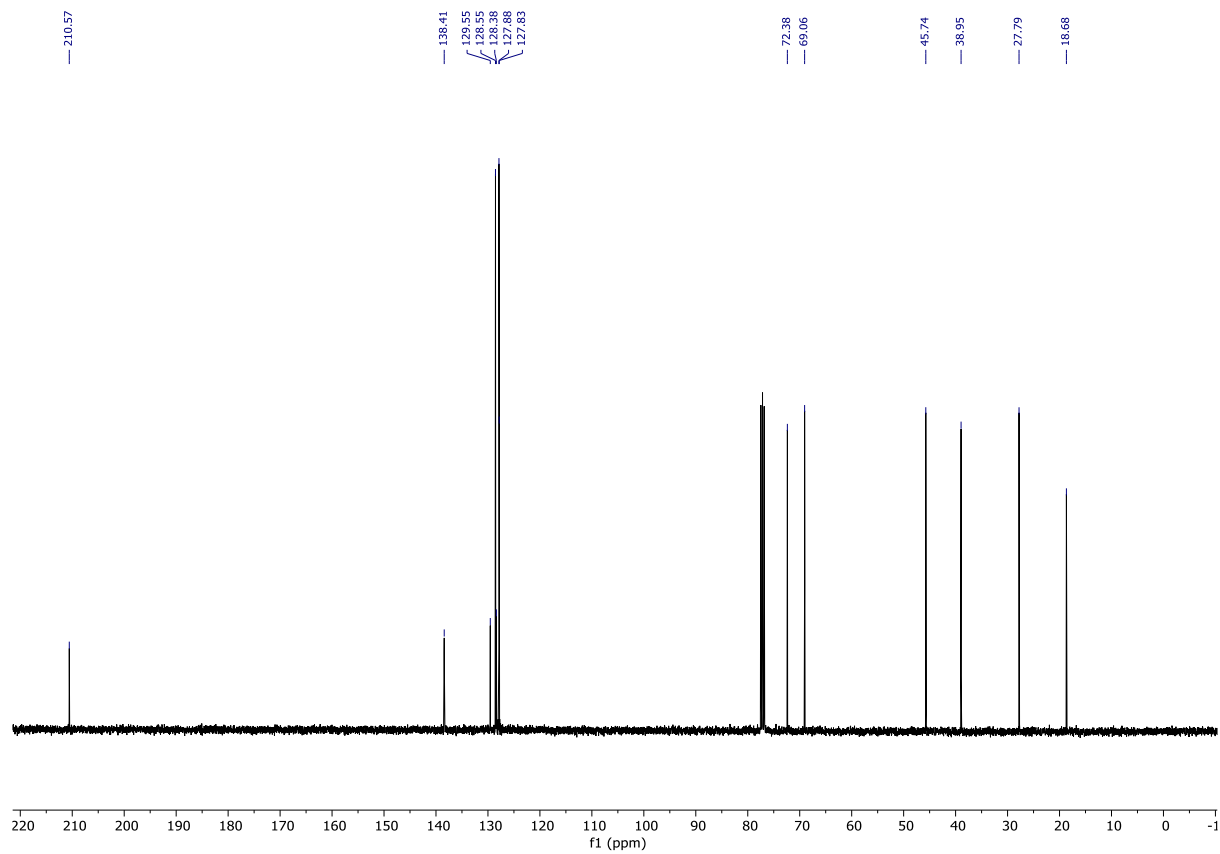

**<sup>1</sup>H NMR (500 MHz, Benzene-*d*<sub>6</sub>) of 1b**

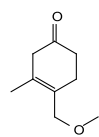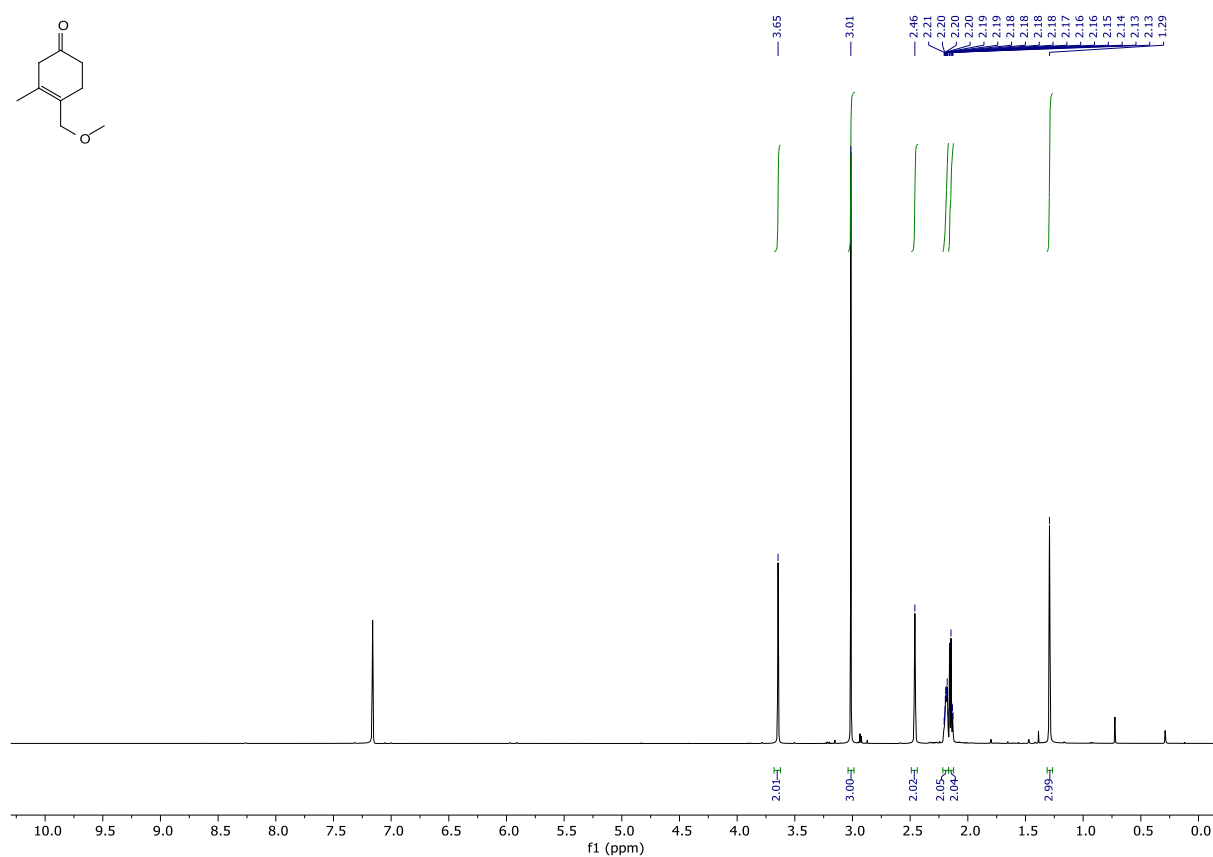

**<sup>13</sup>C NMR (126 MHz, Benzene-*d*<sub>6</sub>) of 1b**

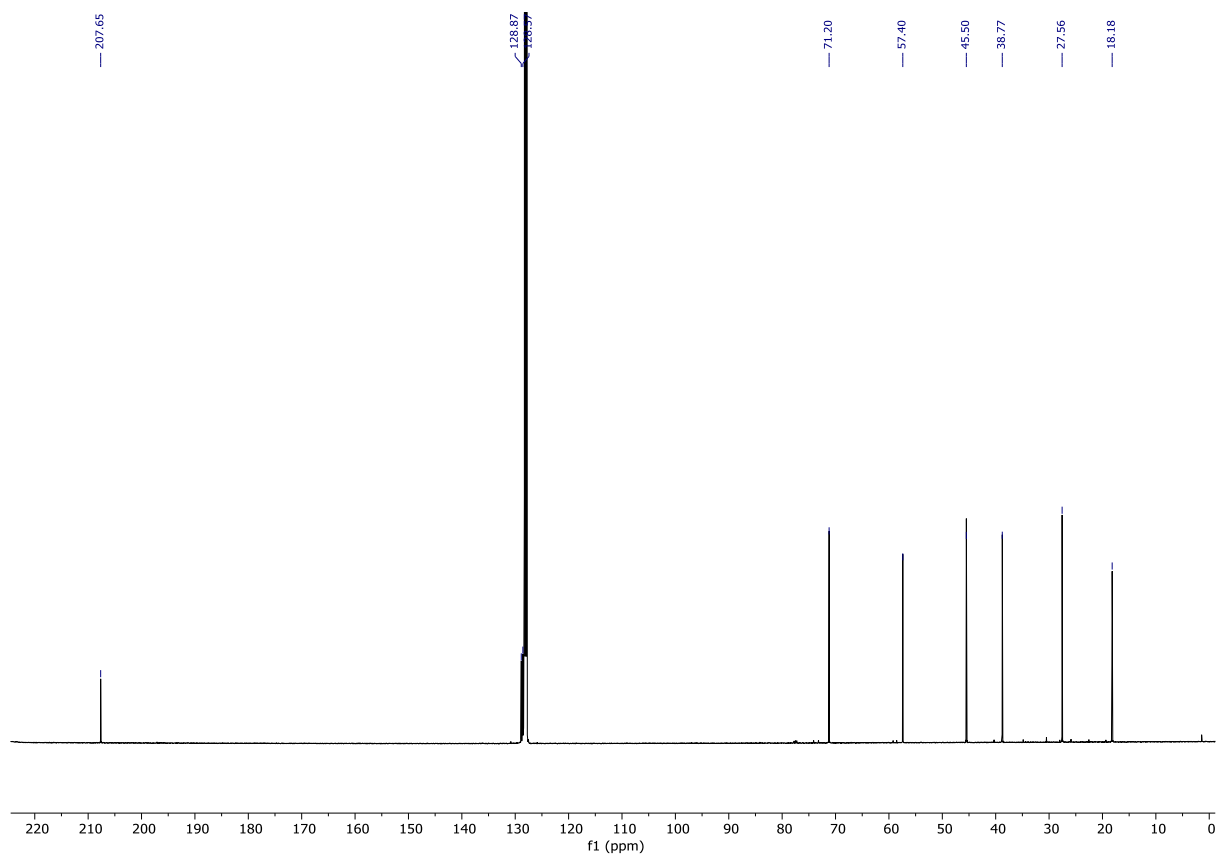

**<sup>1</sup>H NMR (400 MHz, Acetone-*d*<sub>6</sub>) of 1c**

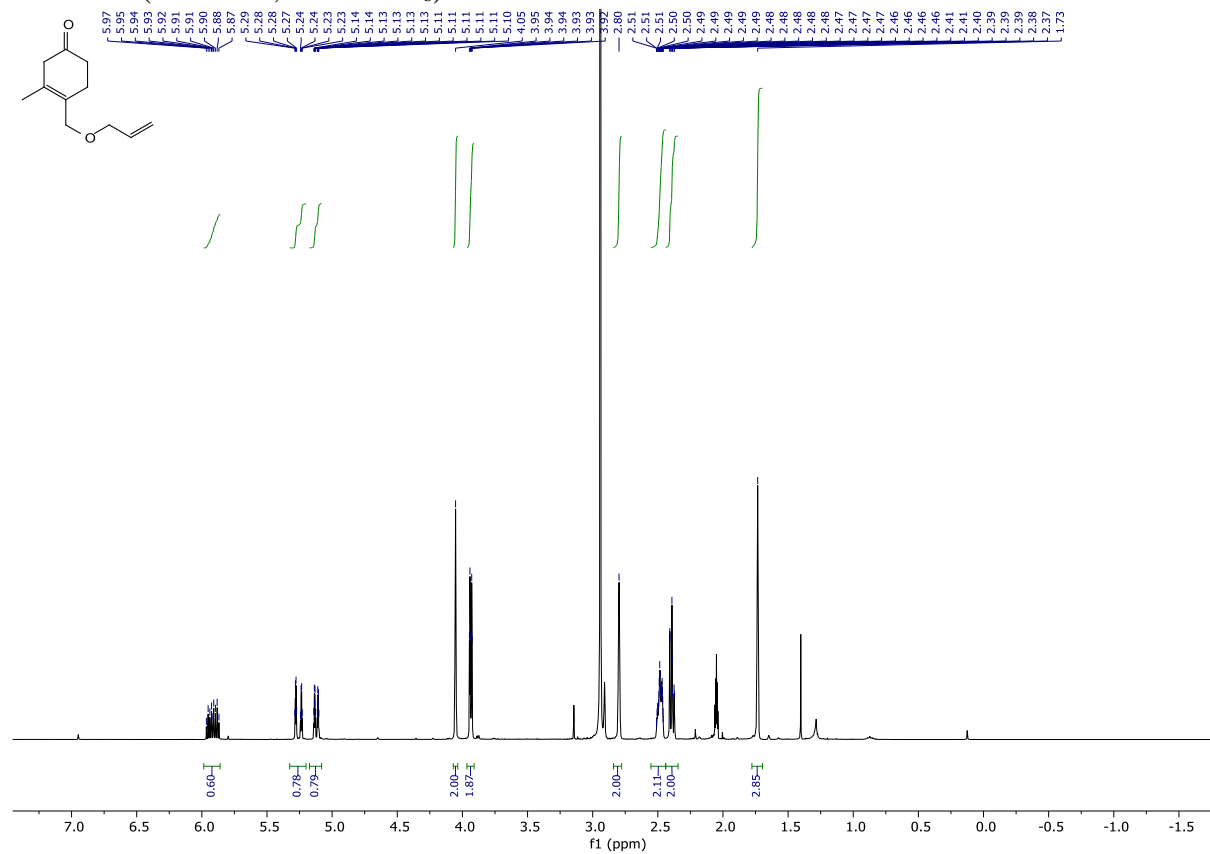

**<sup>13</sup>C NMR (101 MHz, Acetone-*d*<sub>6</sub>) of 1c**

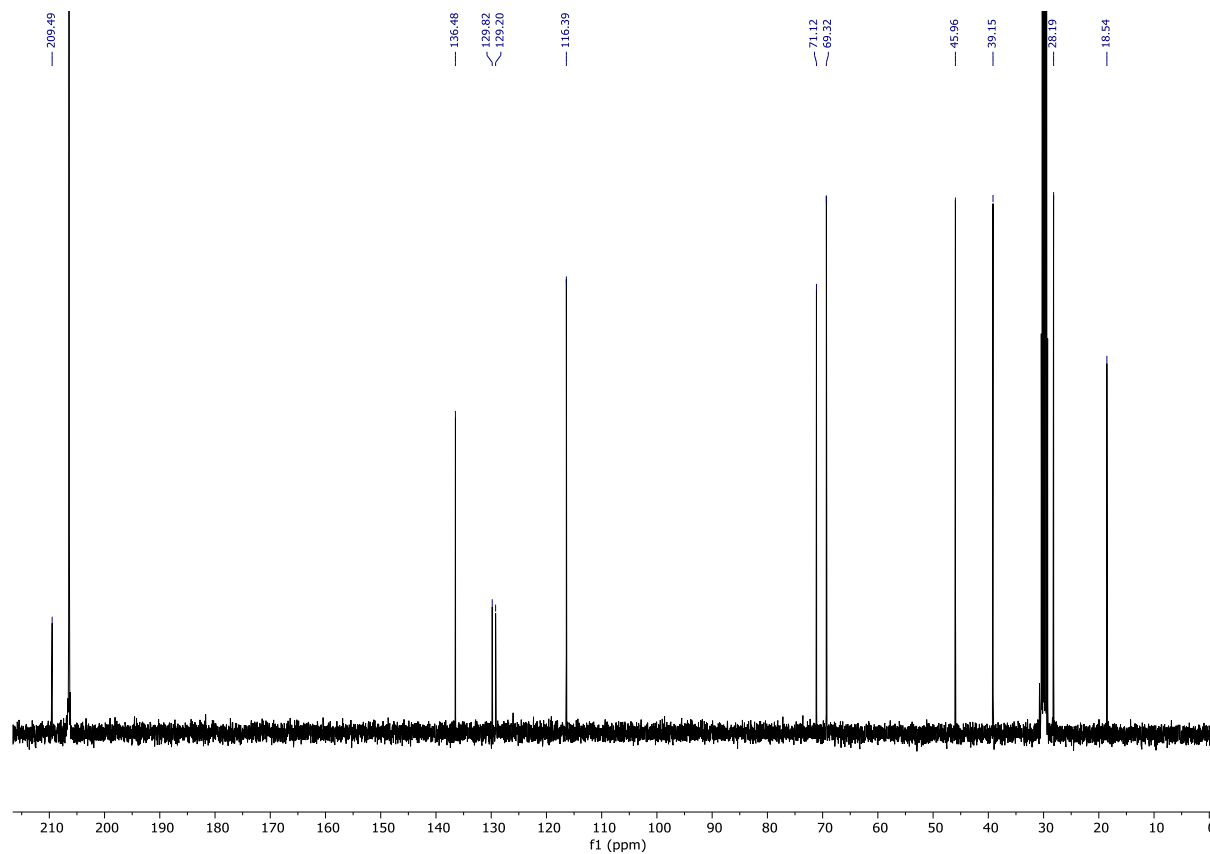

**<sup>1</sup>H NMR (500 MHz, Acetone-*d*<sub>6</sub>) of **1d****

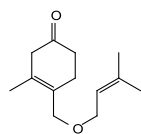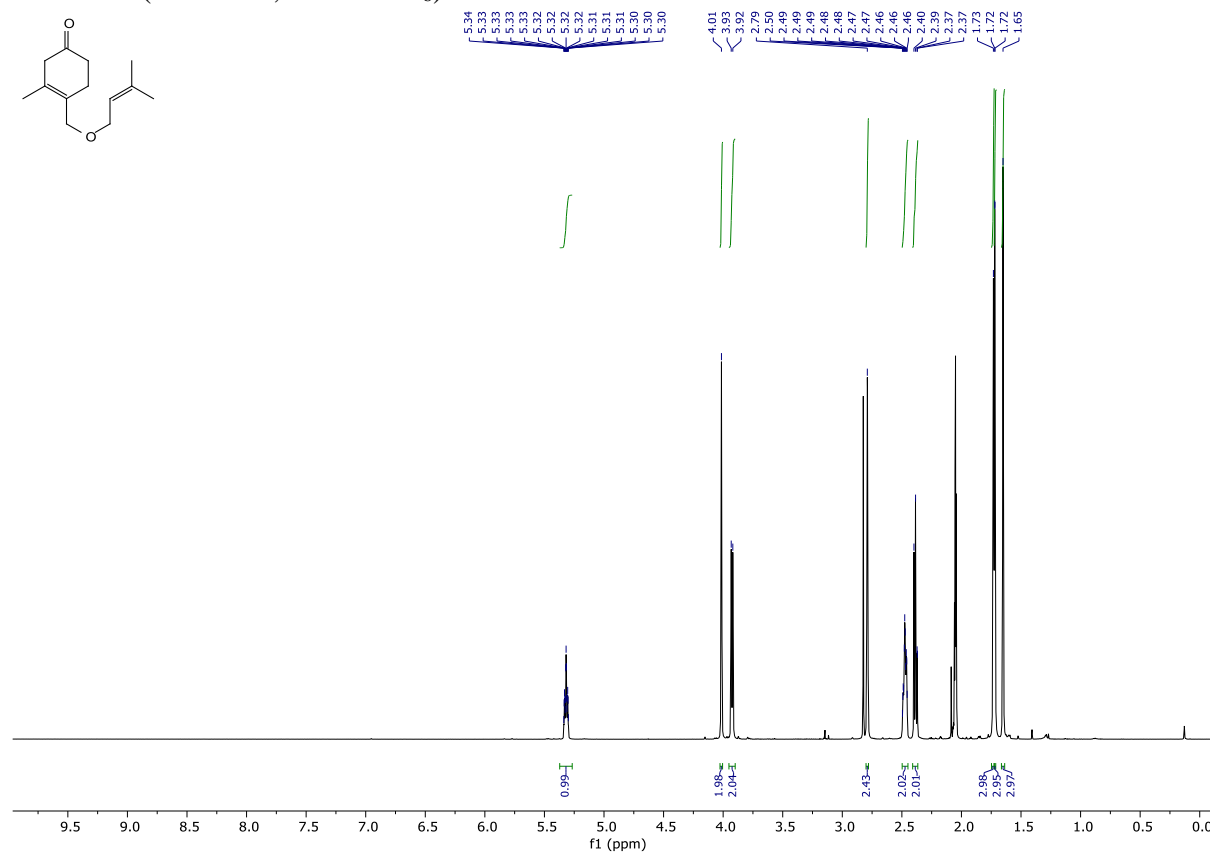

**<sup>13</sup>C NMR (126 MHz, Acetone-*d*<sub>6</sub>) of **1d****

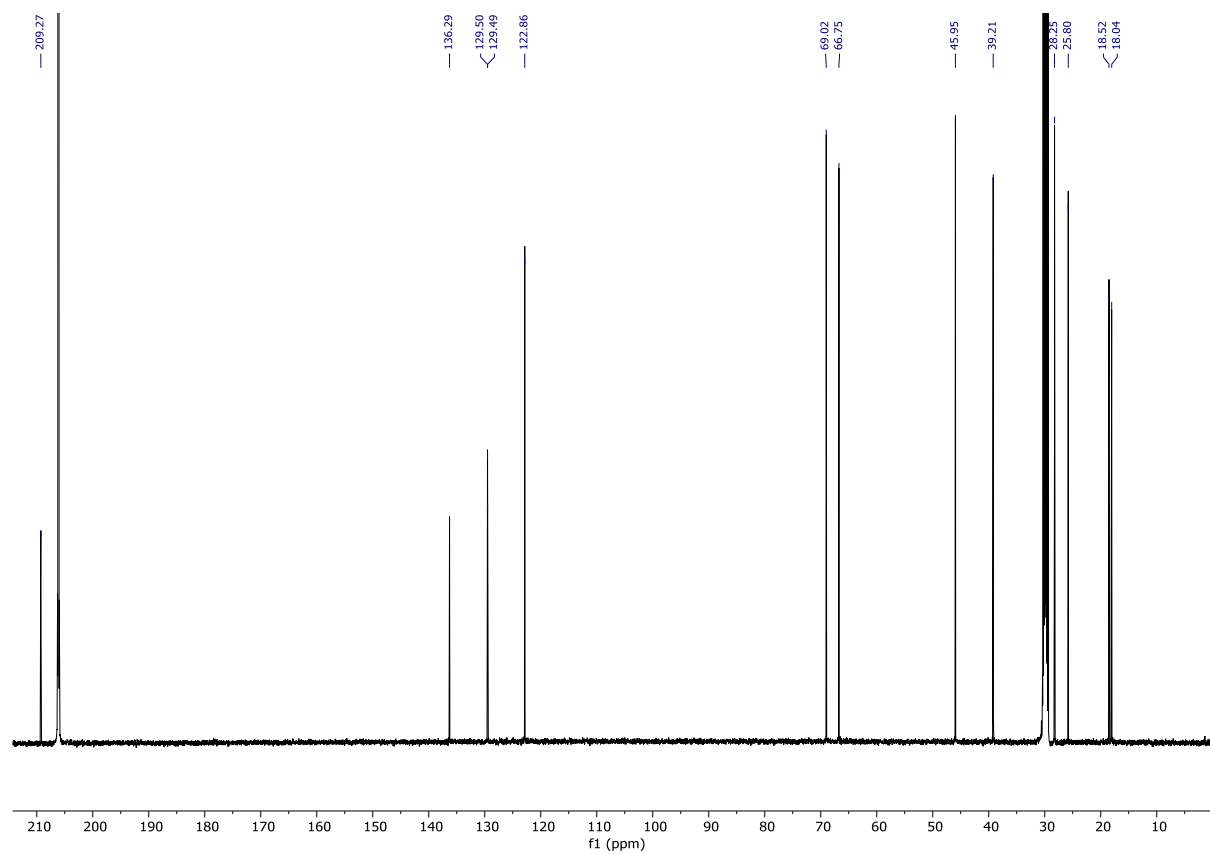

**<sup>1</sup>H NMR (500 MHz, Benzene-*d*<sub>6</sub>) of 1e**

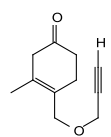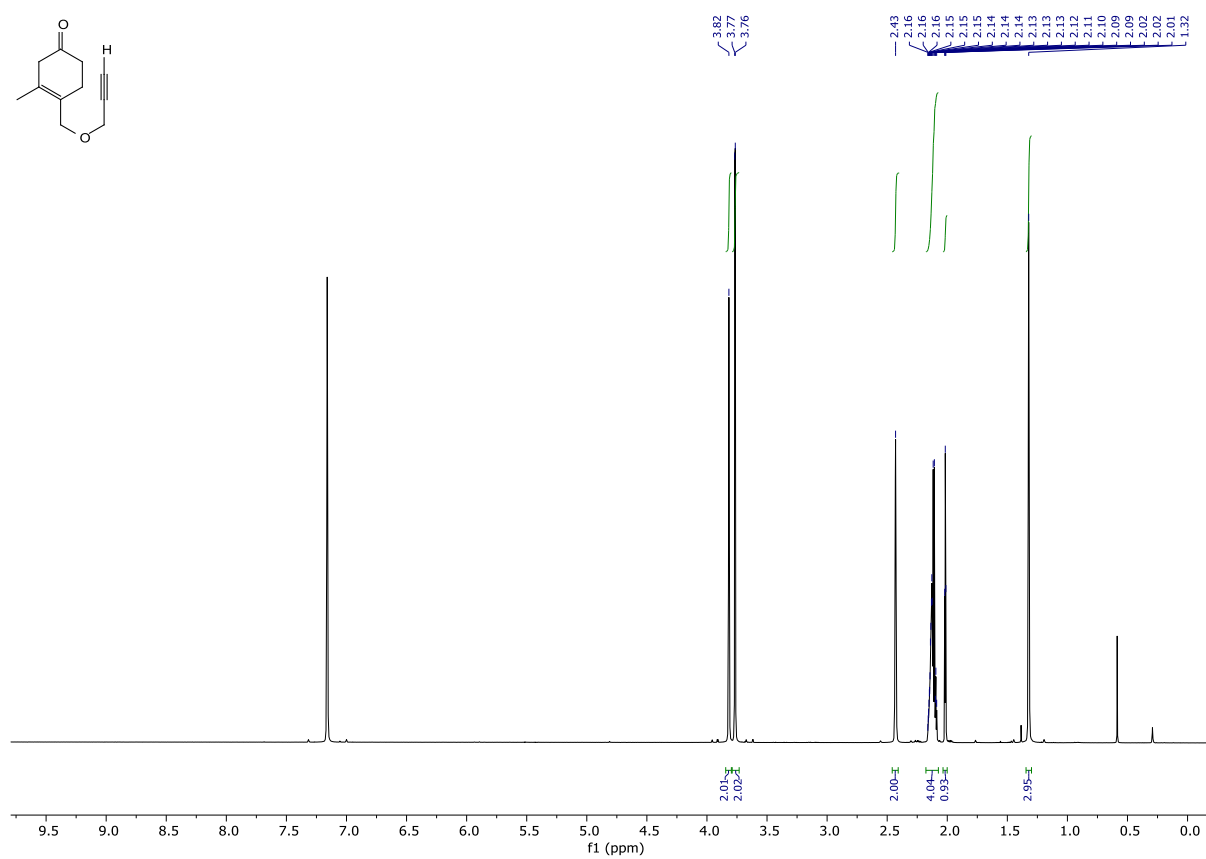

**<sup>13</sup>C NMR (126 MHz, Benzene-*d*<sub>6</sub>) of 1e**

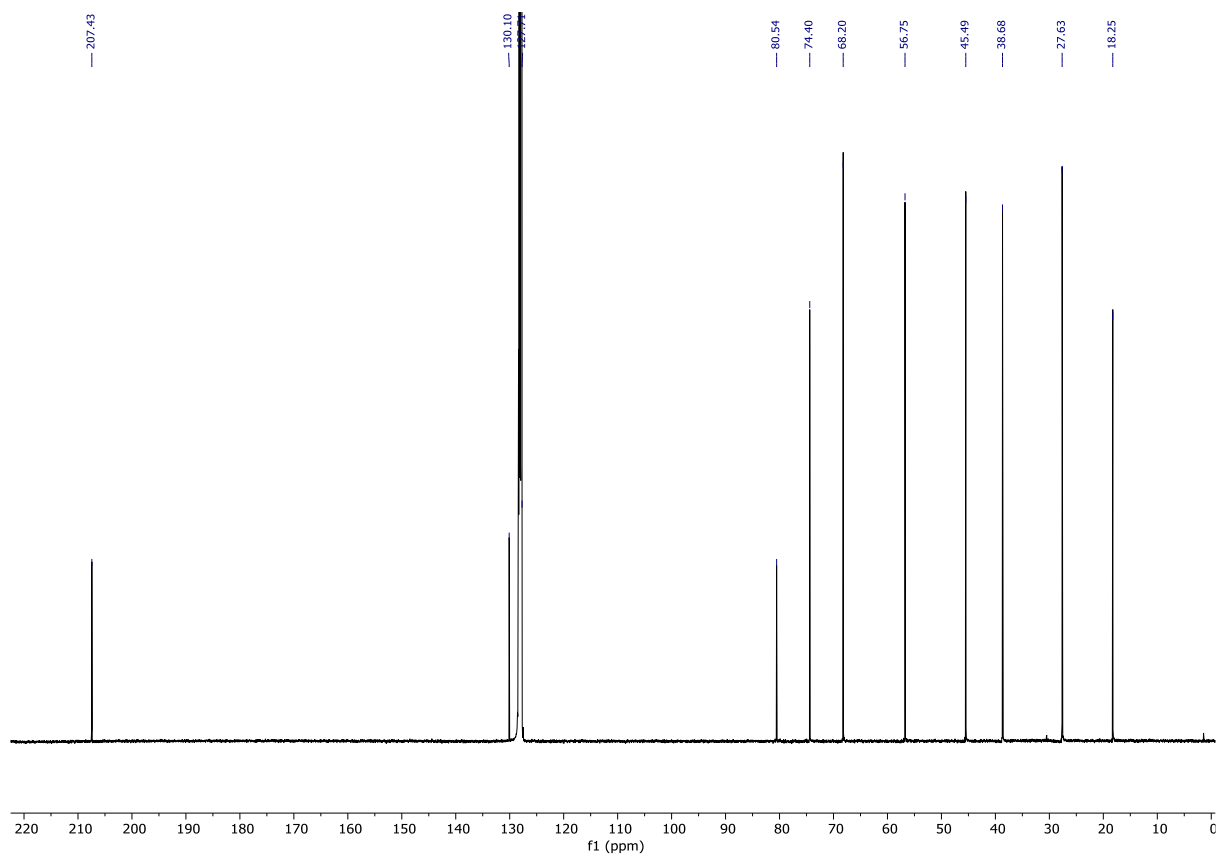

**<sup>1</sup>H NMR (500 MHz, Acetone-*d*<sub>6</sub>) of **1f****

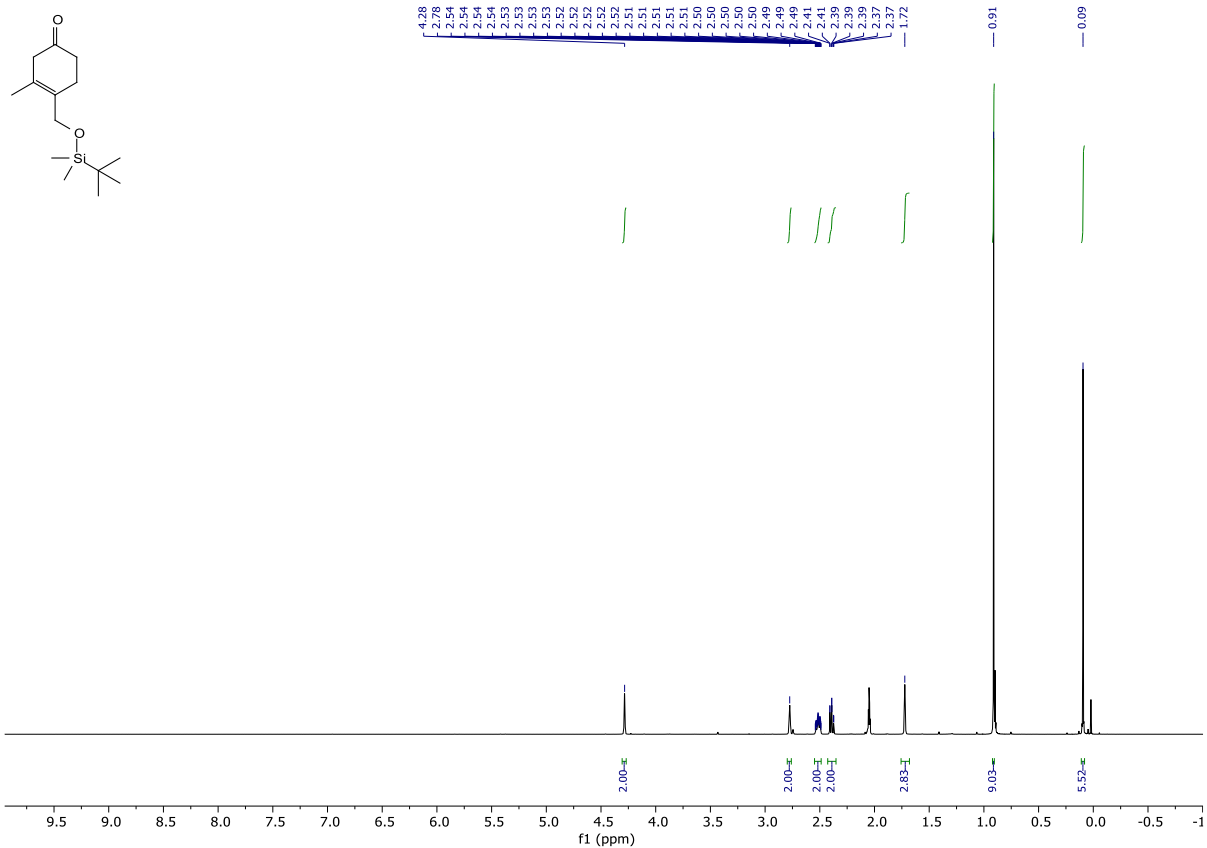

**<sup>13</sup>C NMR (126 MHz, Acetone-*d*<sub>6</sub>) of **1f****

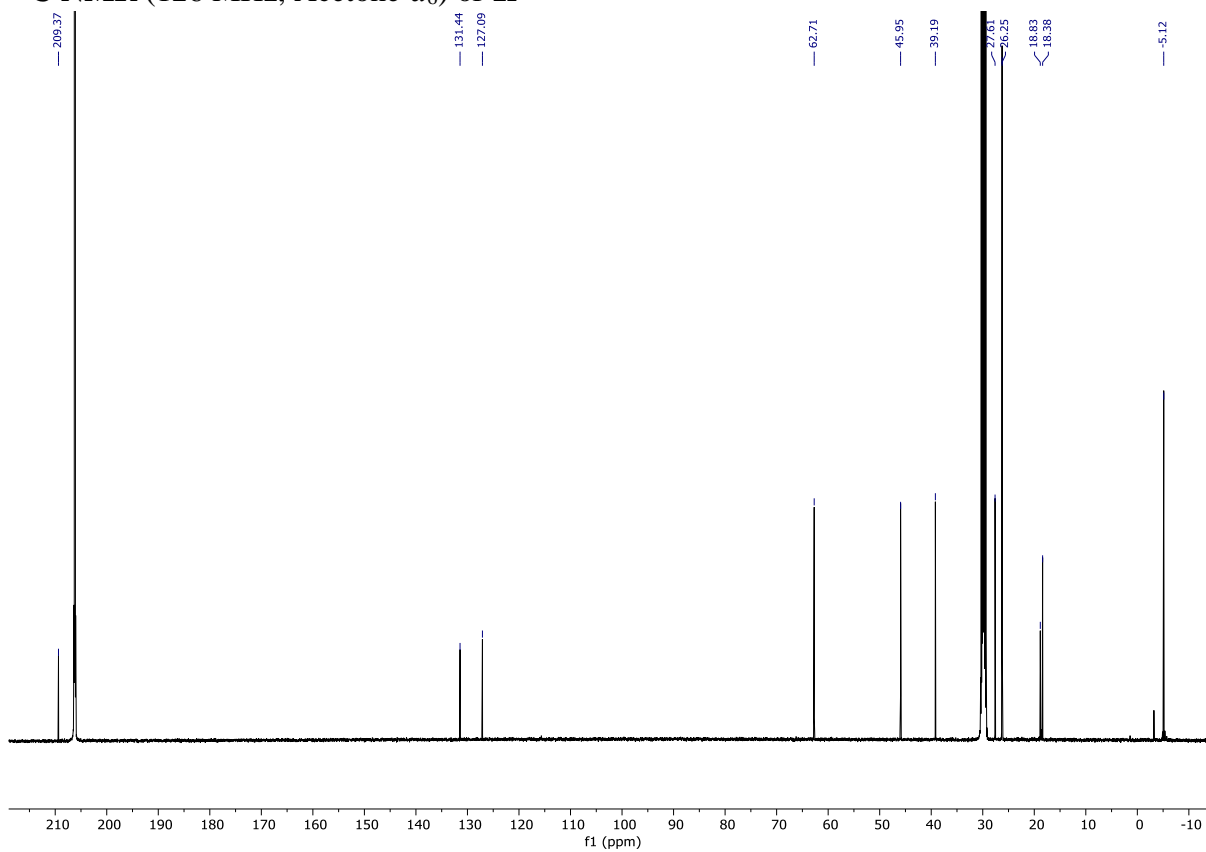

**<sup>1</sup>H NMR (400 MHz, CDCl<sub>3</sub>) of 1g**

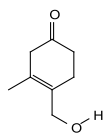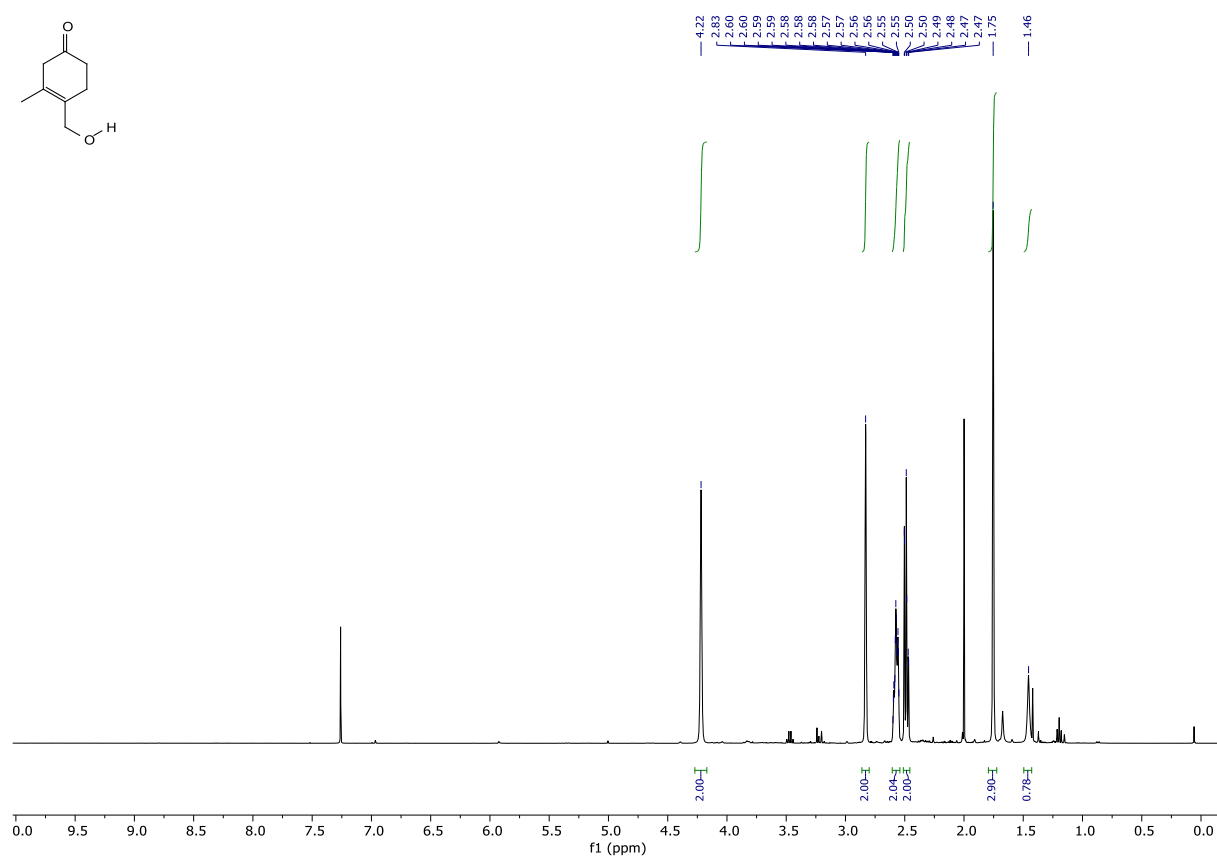

**<sup>13</sup>C NMR (101 MHz, CDCl<sub>3</sub>) of 1g**

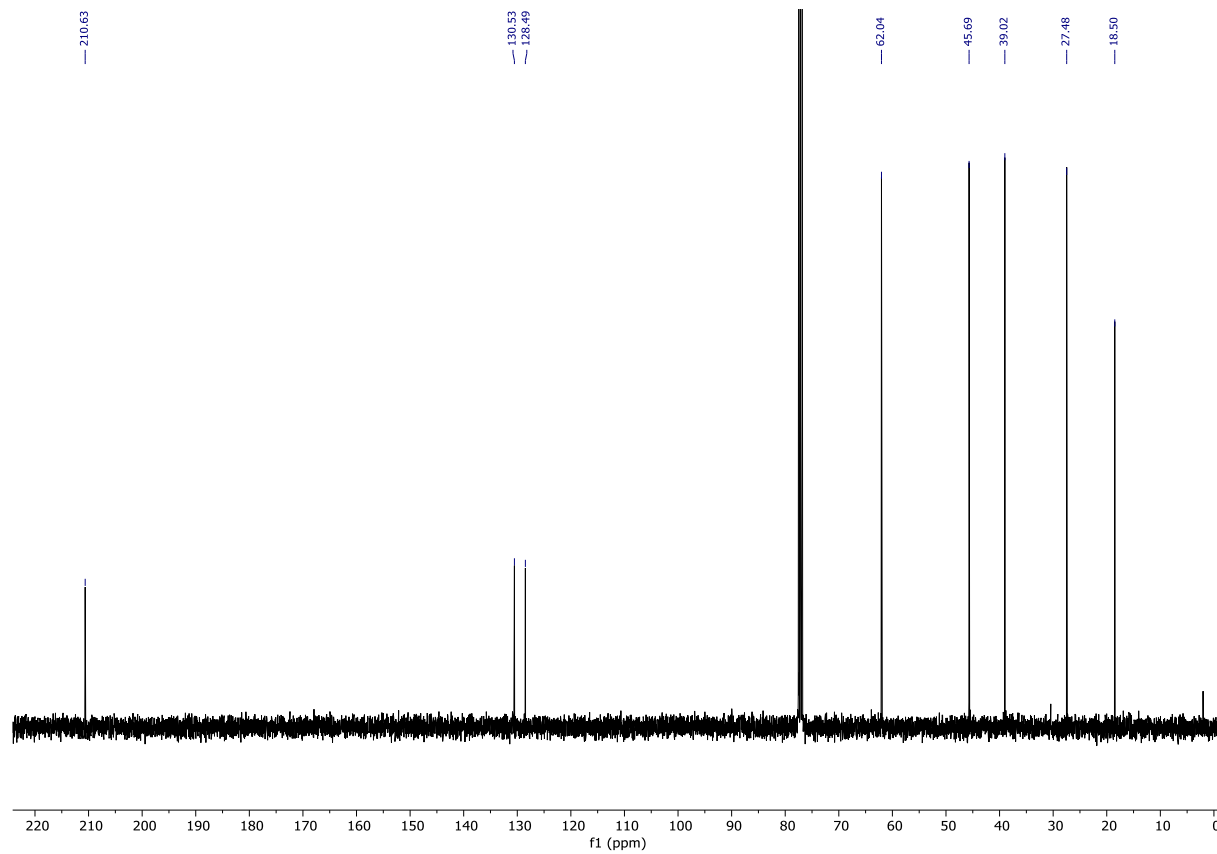

# <sup>1</sup>H NMR (400 MHz, Acetone-*d*<sub>6</sub>) of **1h**

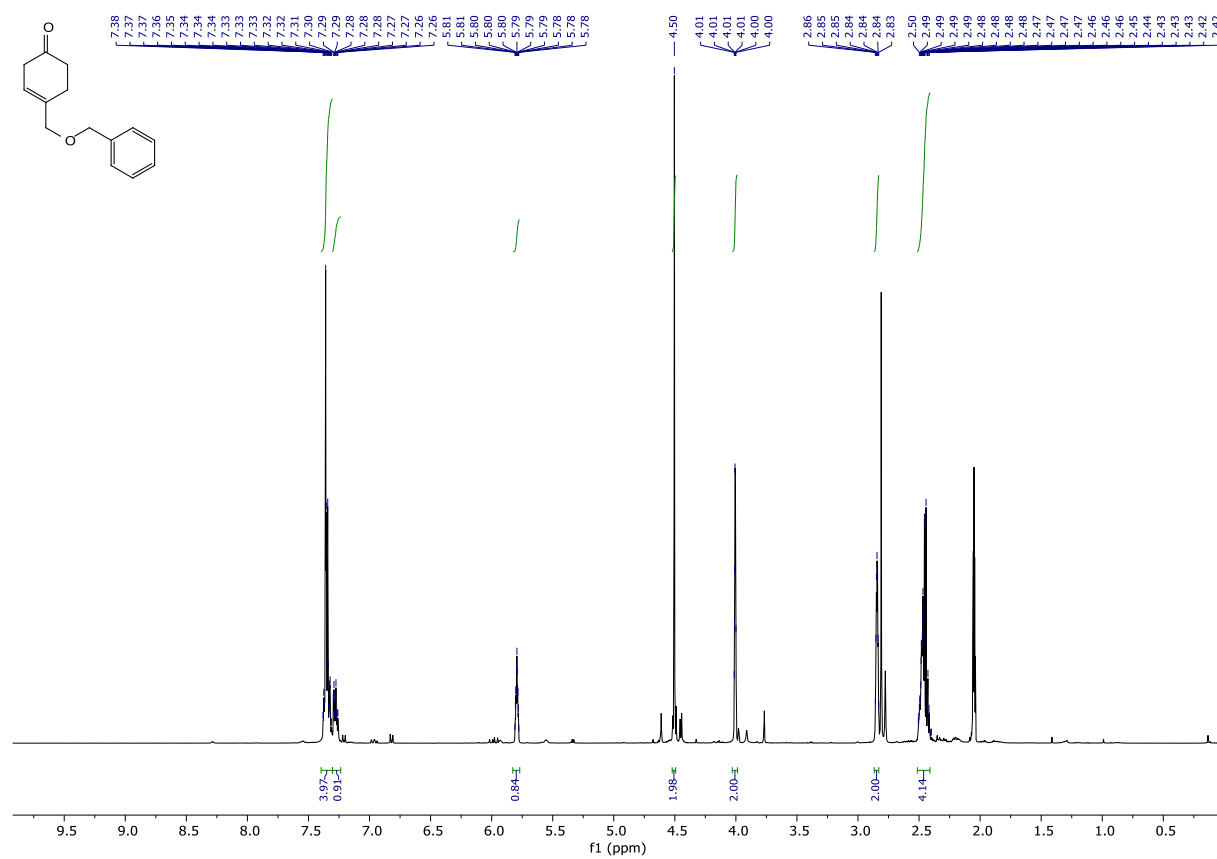

# <sup>13</sup>C NMR (151 MHz, Acetone-*d*<sub>6</sub>) of **1h**

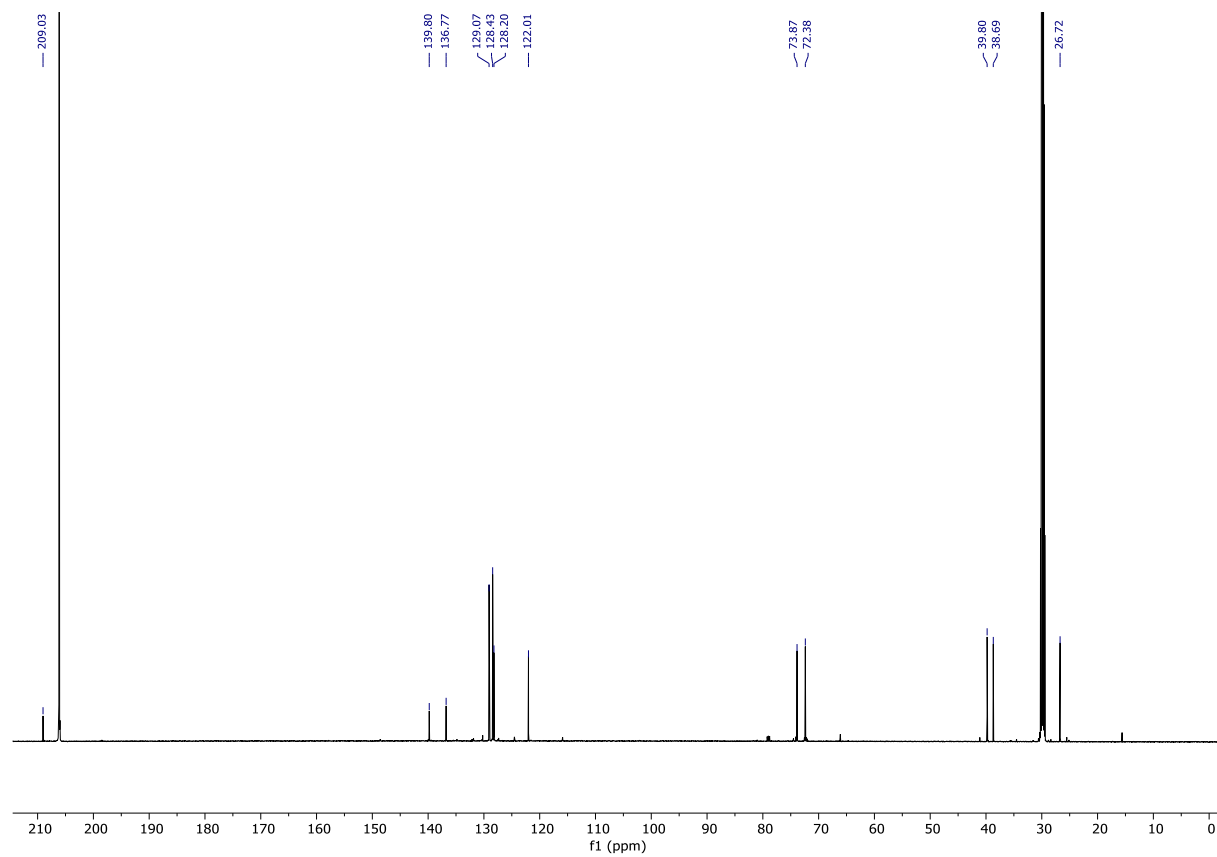



# <sup>1</sup>H NMR (600 MHz, Acetone-*d*<sub>6</sub>) of **1i**

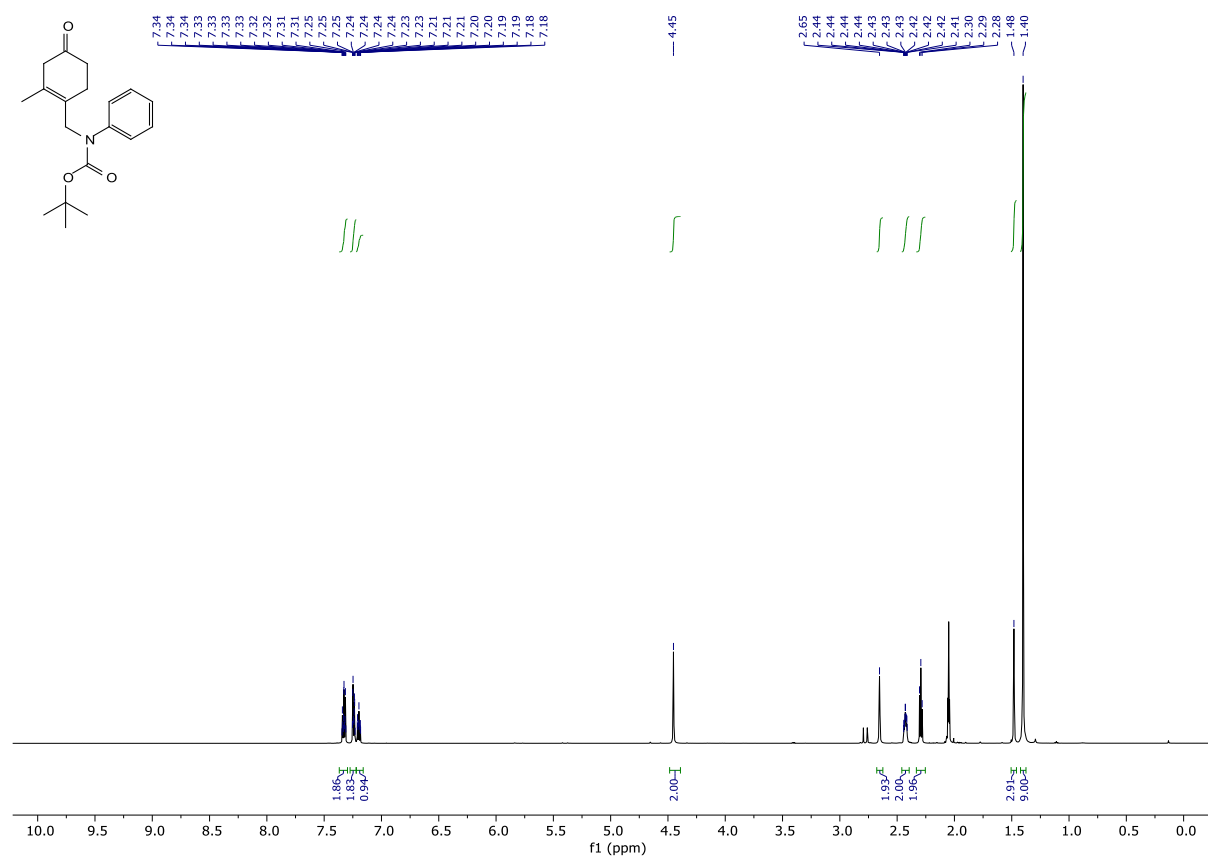

# <sup>13</sup>C NMR (151 MHz, Acetone-*d*<sub>6</sub>) of **1i**

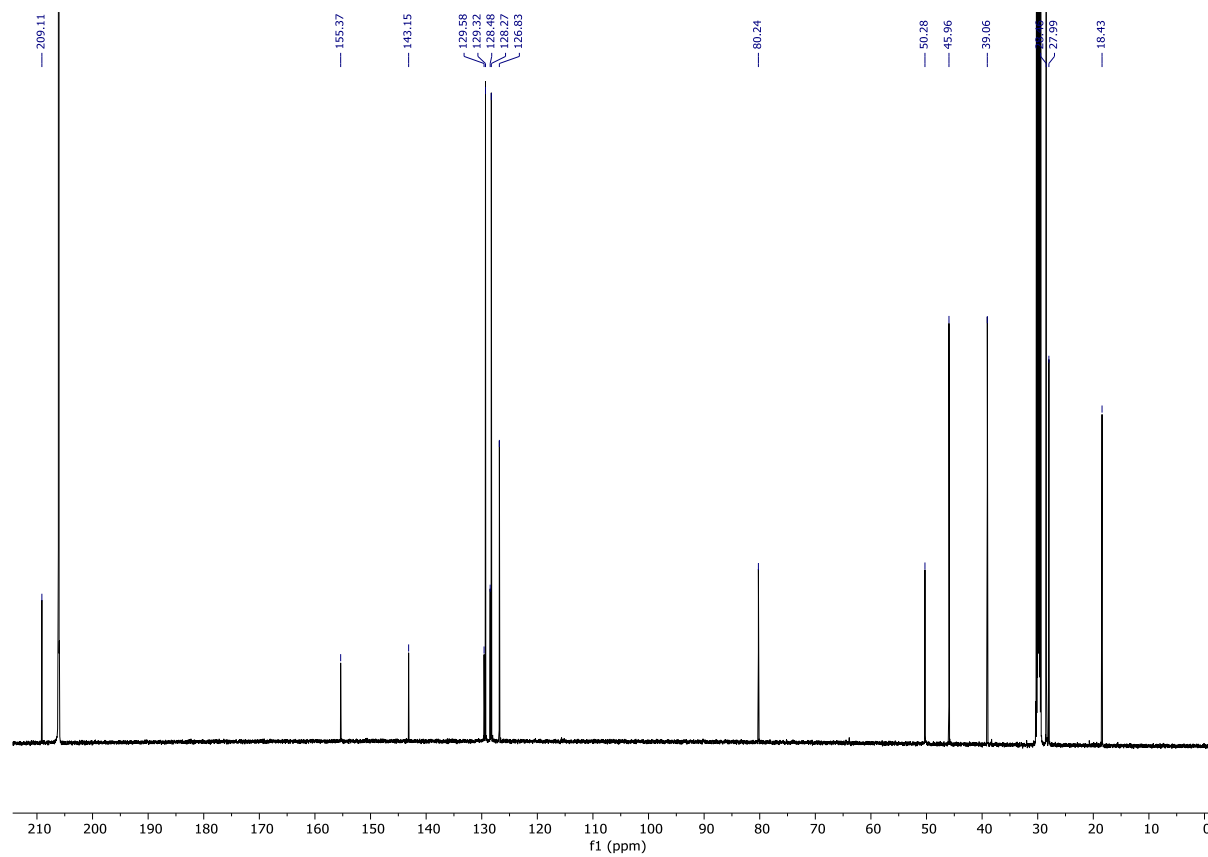

**<sup>1</sup>H NMR (600 MHz, Acetone-*d*<sub>6</sub>) of **1j****

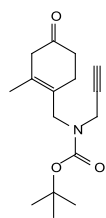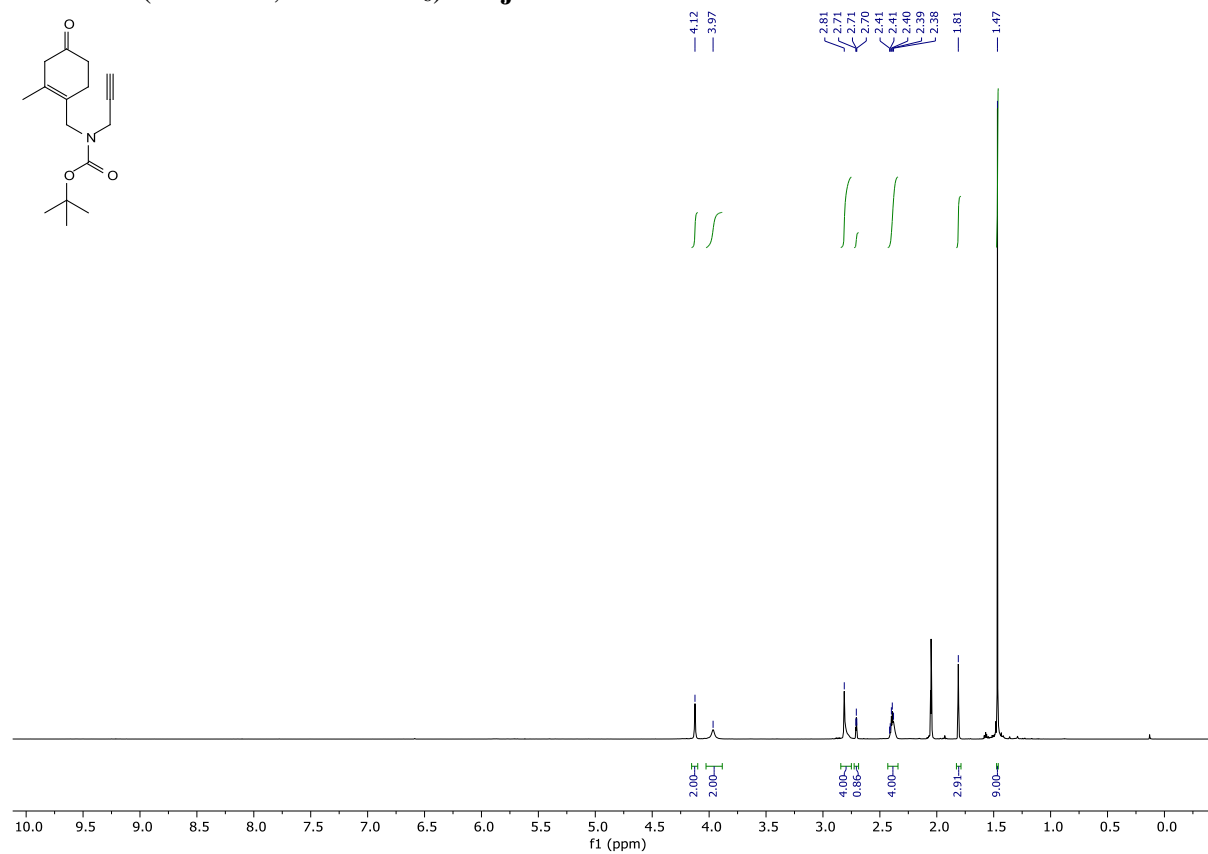

**<sup>13</sup>C NMR (151 MHz, Acetone-*d*<sub>6</sub>) of **1j****

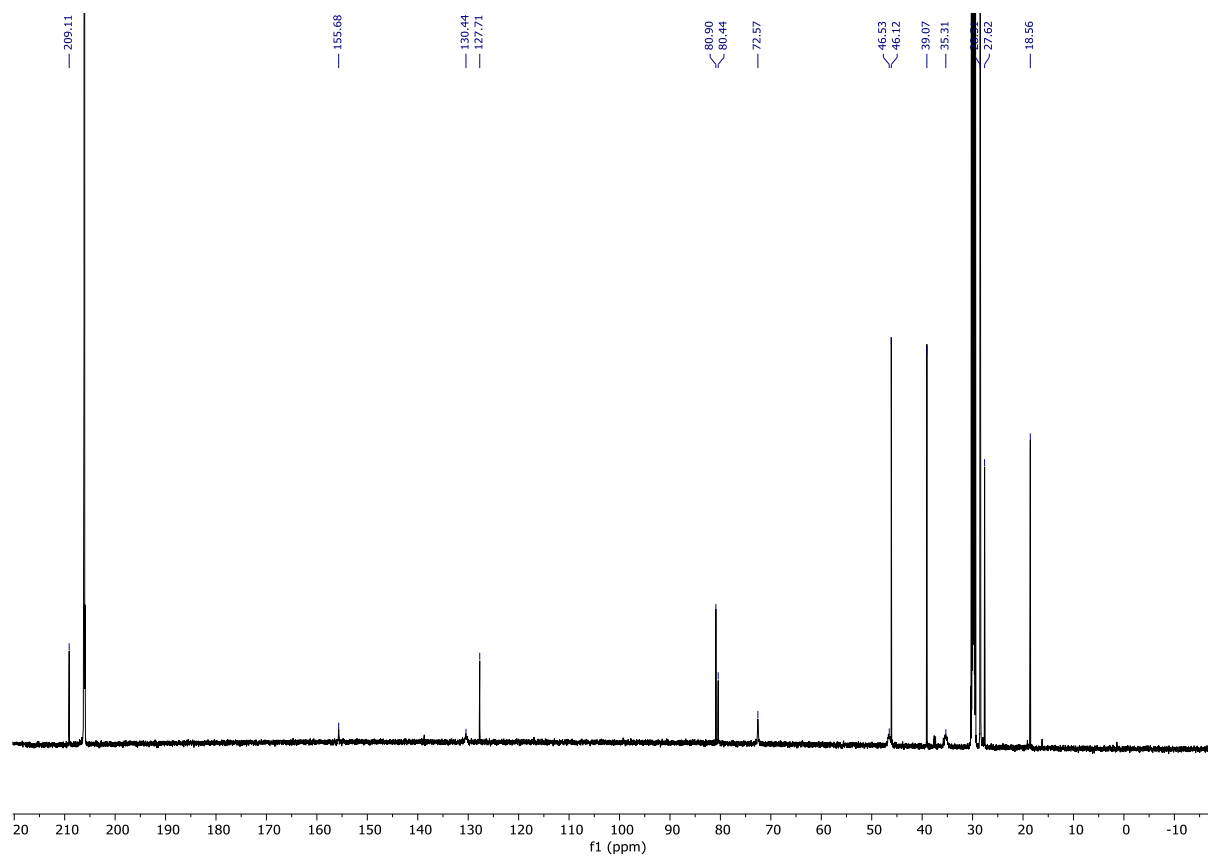

# $^1\text{H}$ NMR (400 MHz, Methanol- $d_4$ ) of **1k**

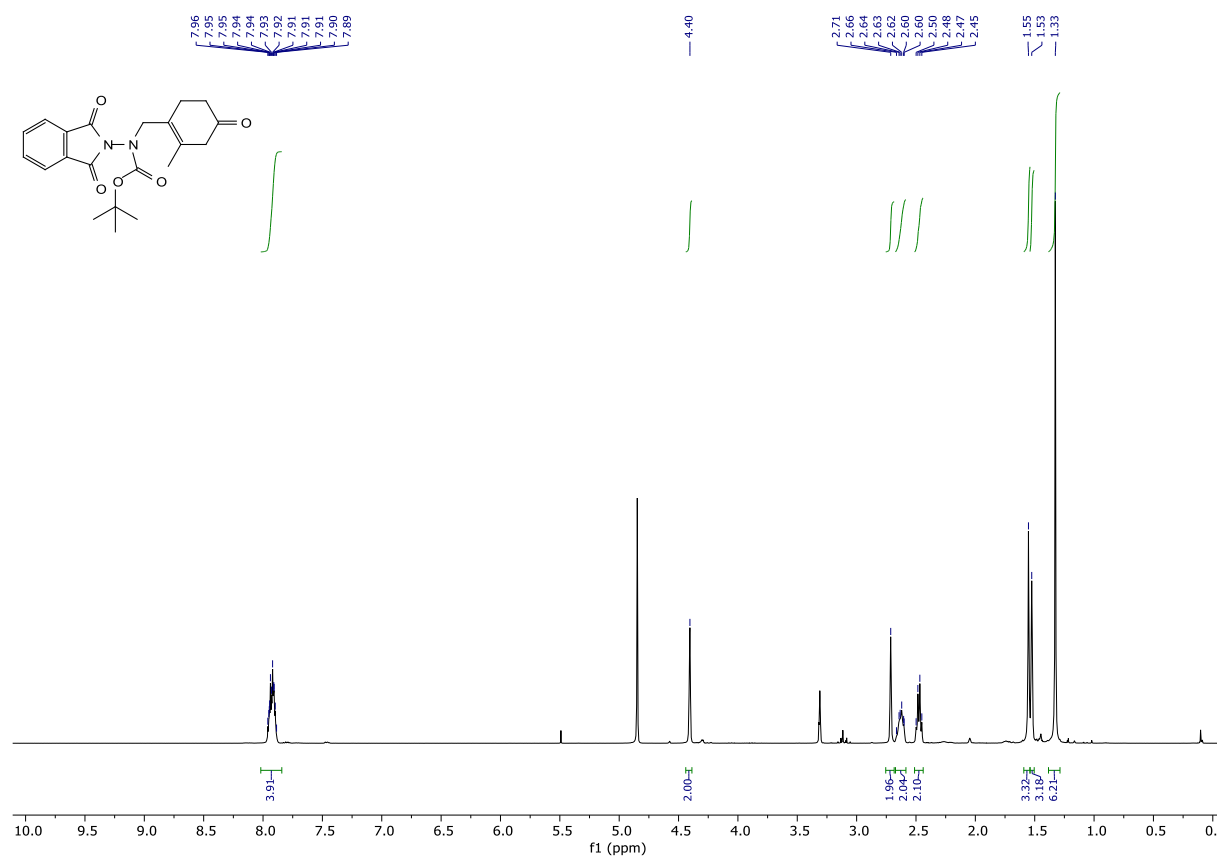

# $^{13}\text{C}$ NMR (101 MHz, Methanol- $d_4$ ) of **1k**

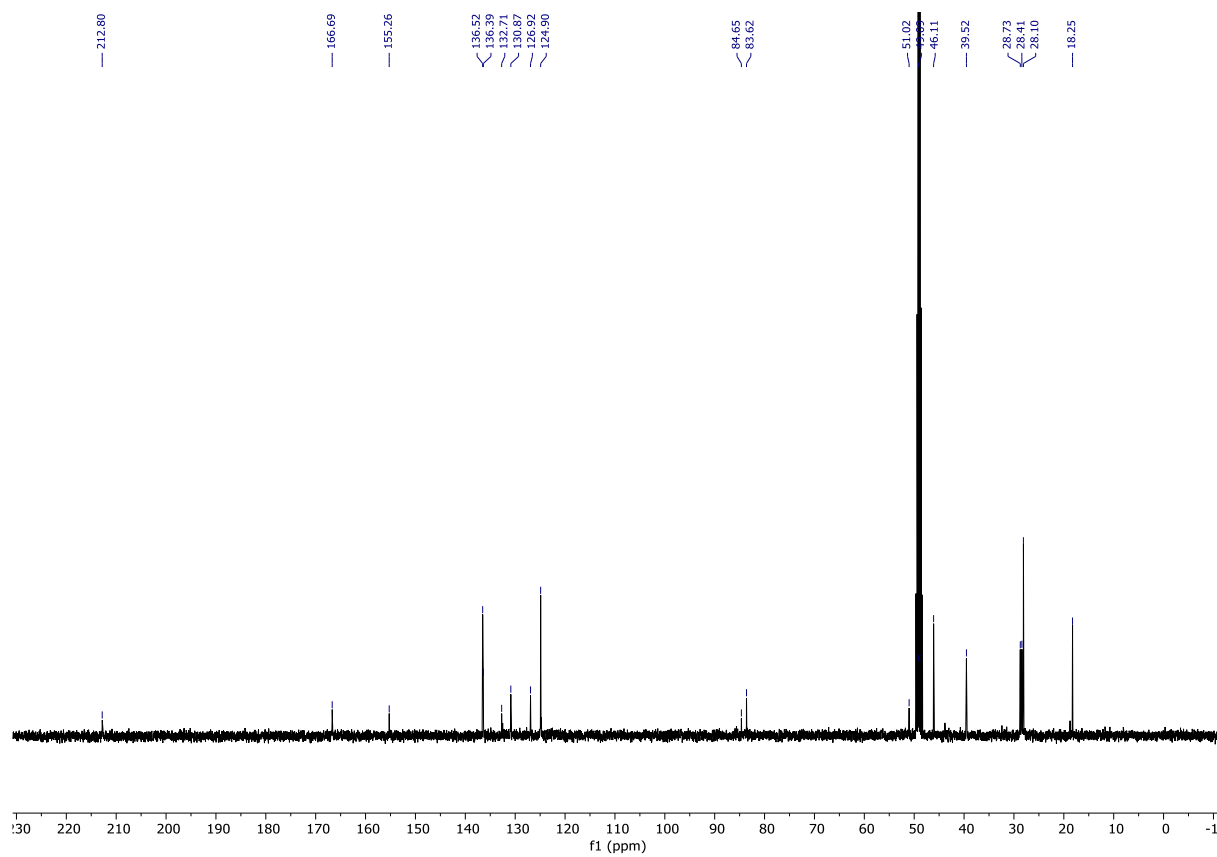

# <sup>1</sup>H NMR (400 MHz, Acetone-*d*<sub>6</sub>) of **11**

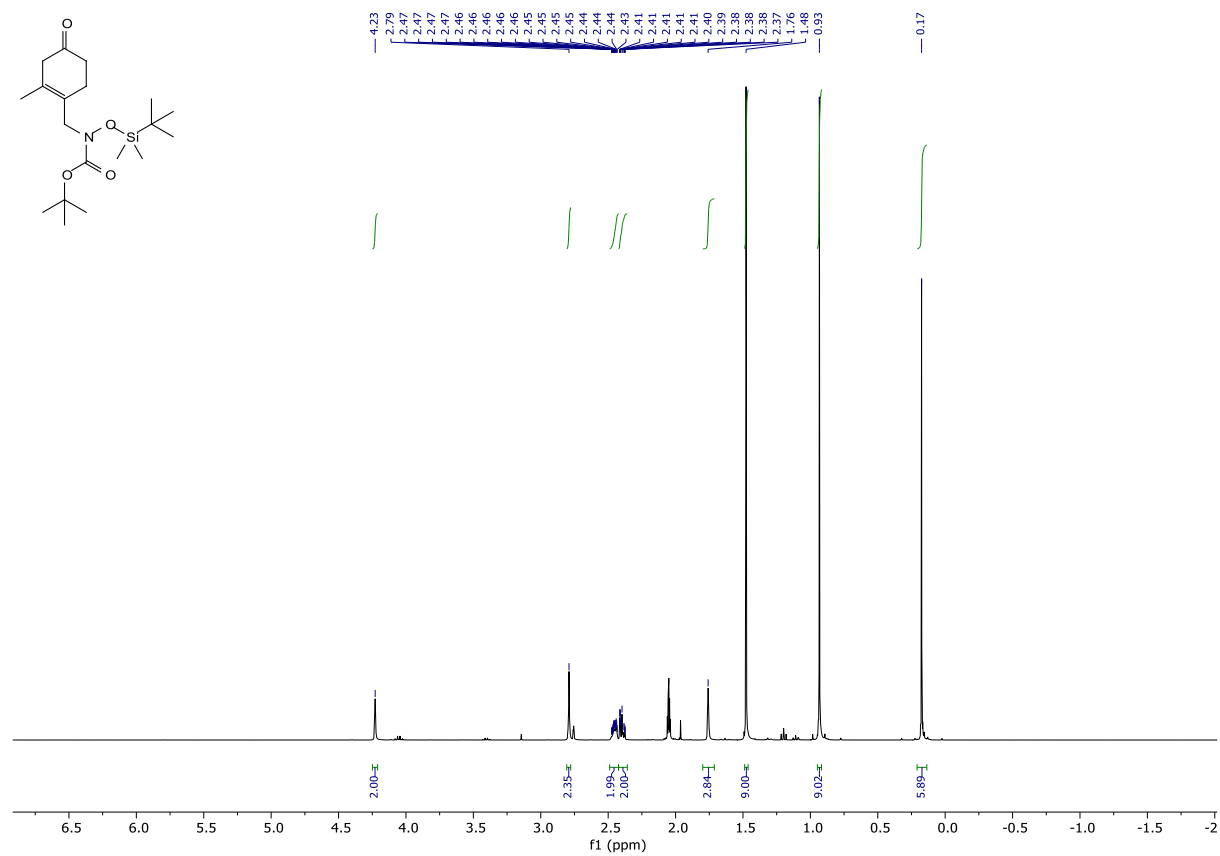

# <sup>13</sup>C NMR (126 MHz, Acetone-*d*<sub>6</sub>) of **11**

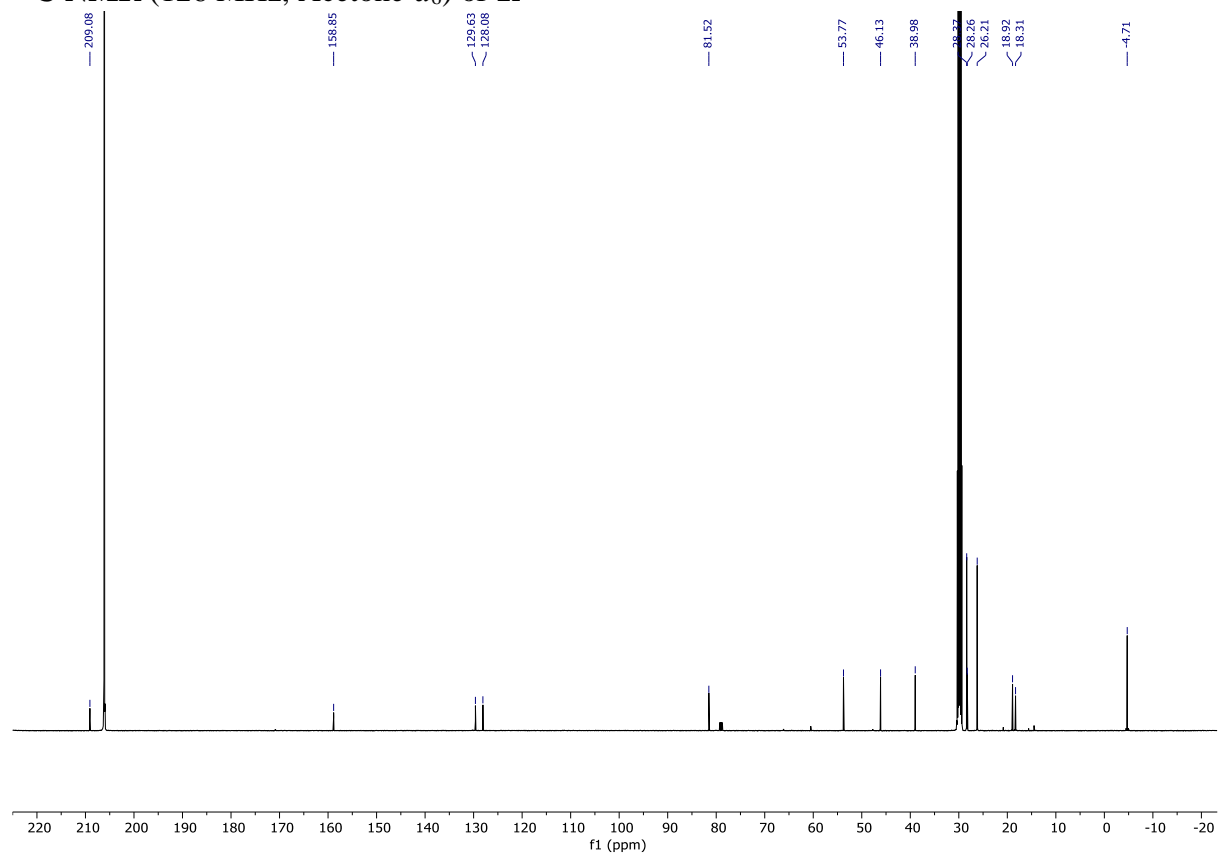

# <sup>1</sup>H NMR (500 MHz, Acetone-*d*<sub>6</sub>) of **1m**

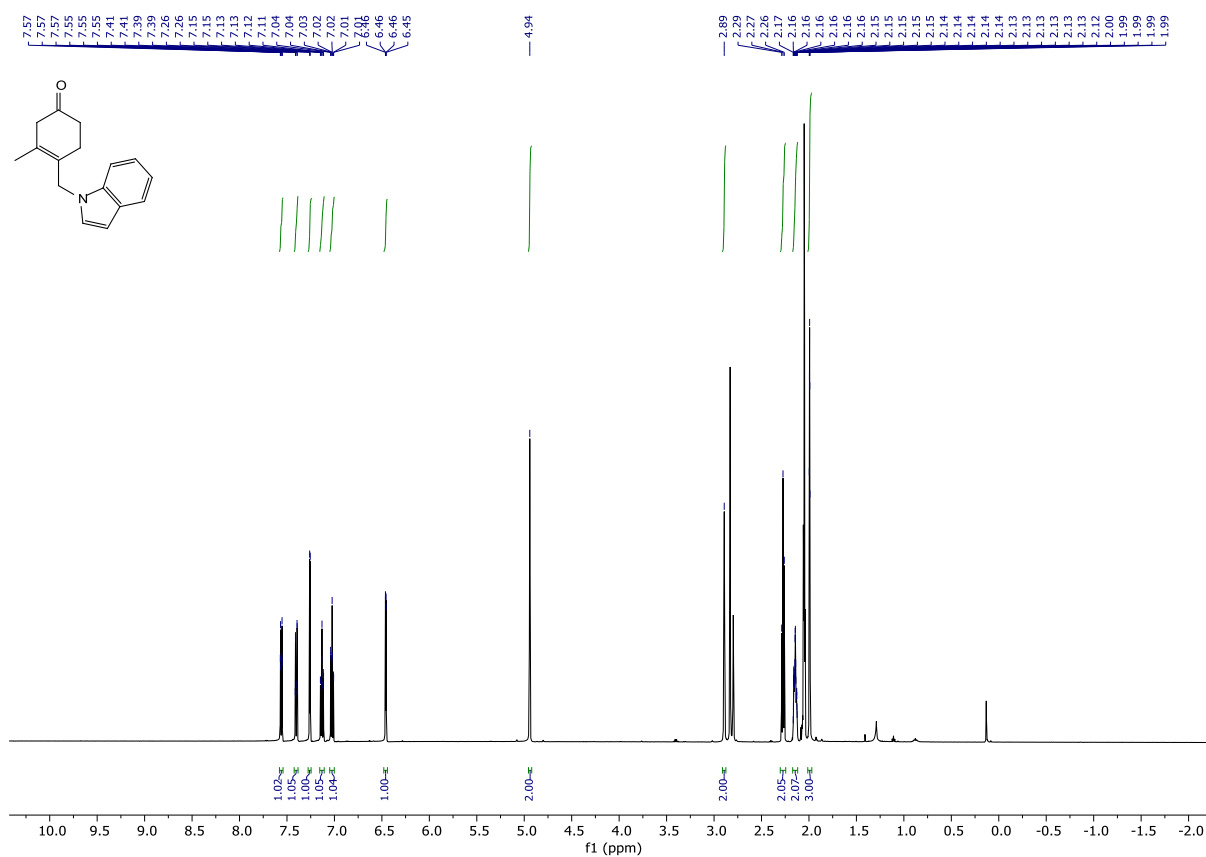

# <sup>13</sup>C NMR (126 MHz, Acetone-*d*<sub>6</sub>) of **1m**

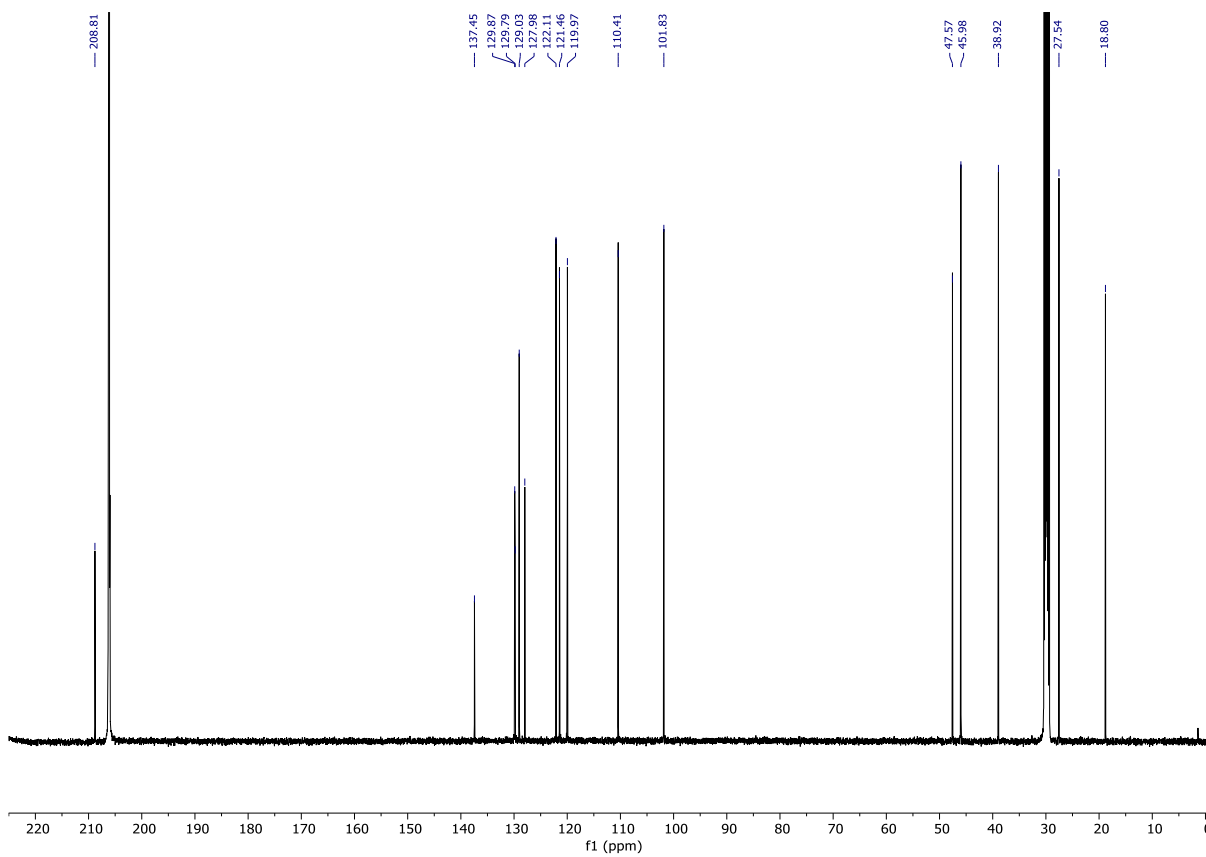

### $^1\text{H}$ NMR (500 MHz, Benzene- $d_6$ ) of **1n**

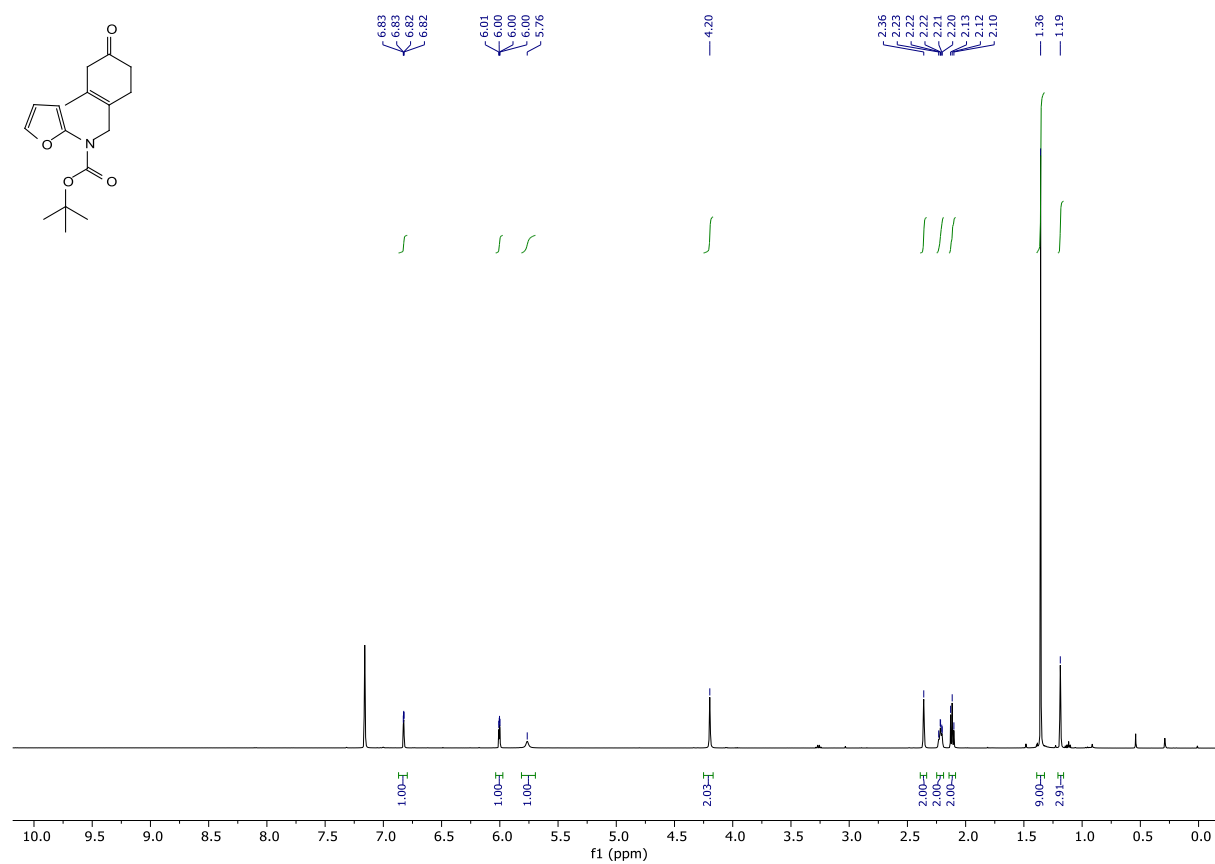

### $^{13}\text{C}$ NMR (126 MHz, Benzene- $d_6$ ) of **1n**

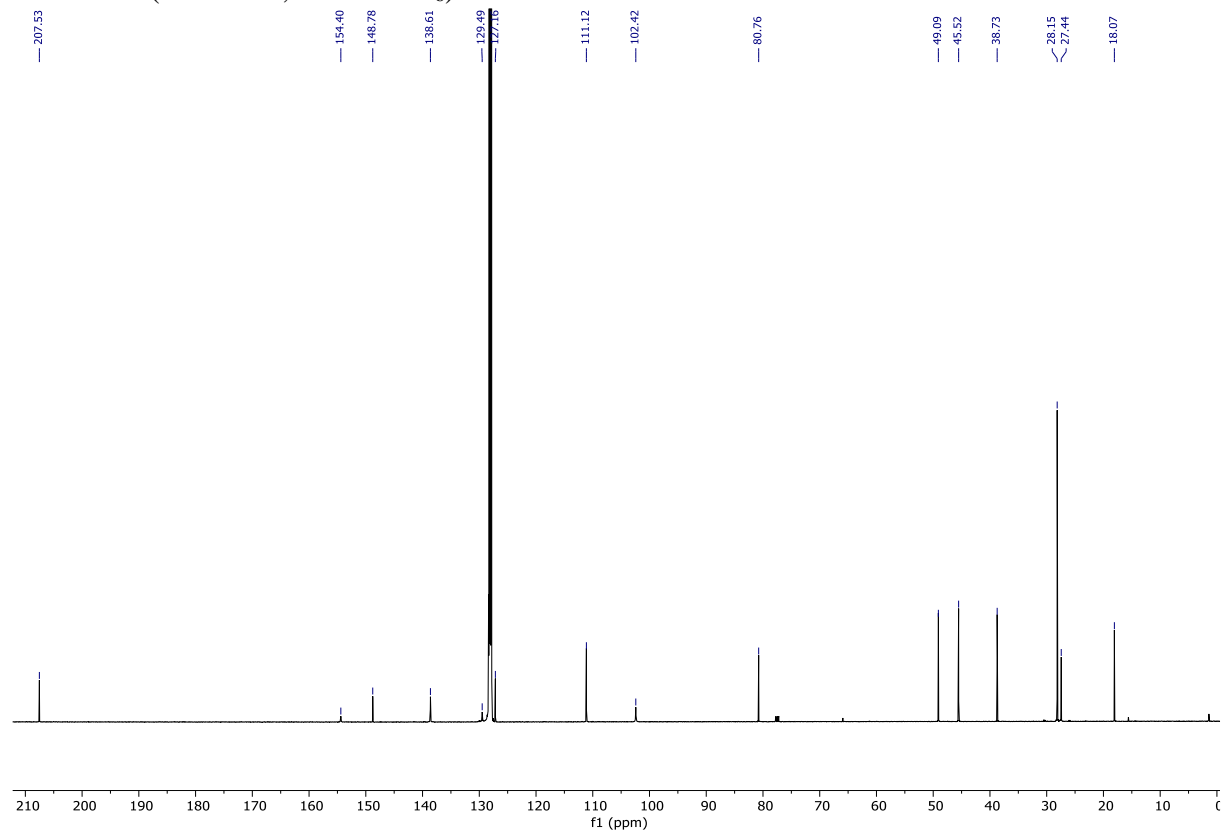

# <sup>1</sup>H NMR (500 MHz, Acetone-*d*<sub>6</sub>) of **1o**

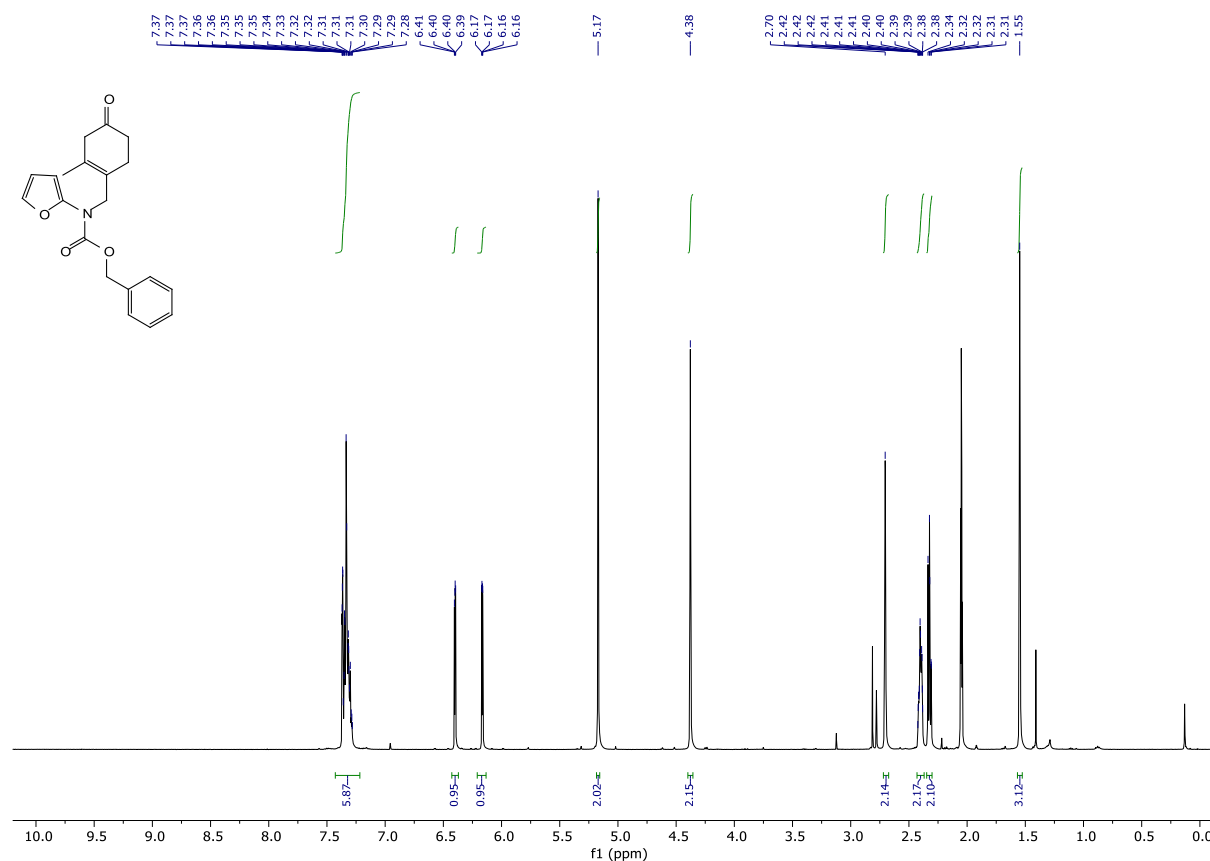

# <sup>13</sup>C NMR (126 MHz, Acetone-*d*<sub>6</sub>) of **1o**

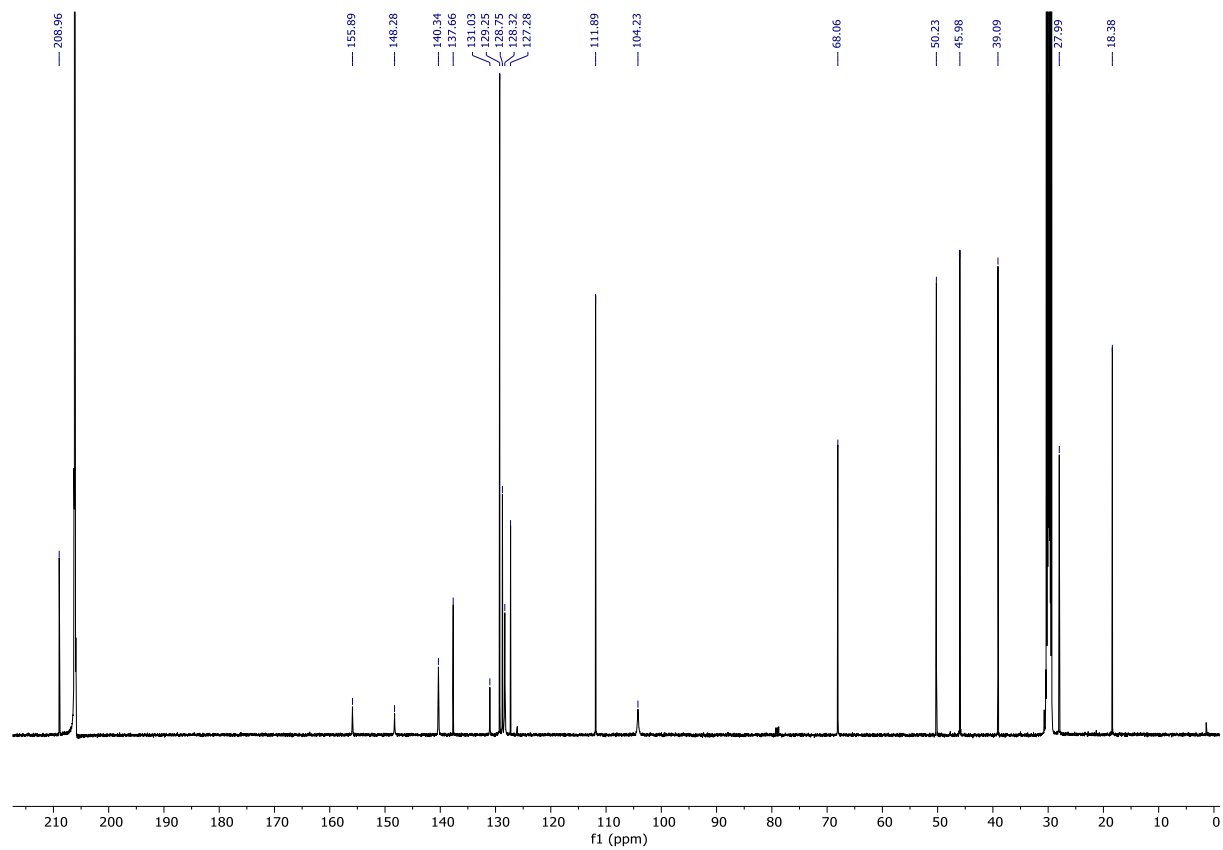

# <sup>1</sup>H NMR (500 MHz, CDCl<sub>3</sub>) of **1p**

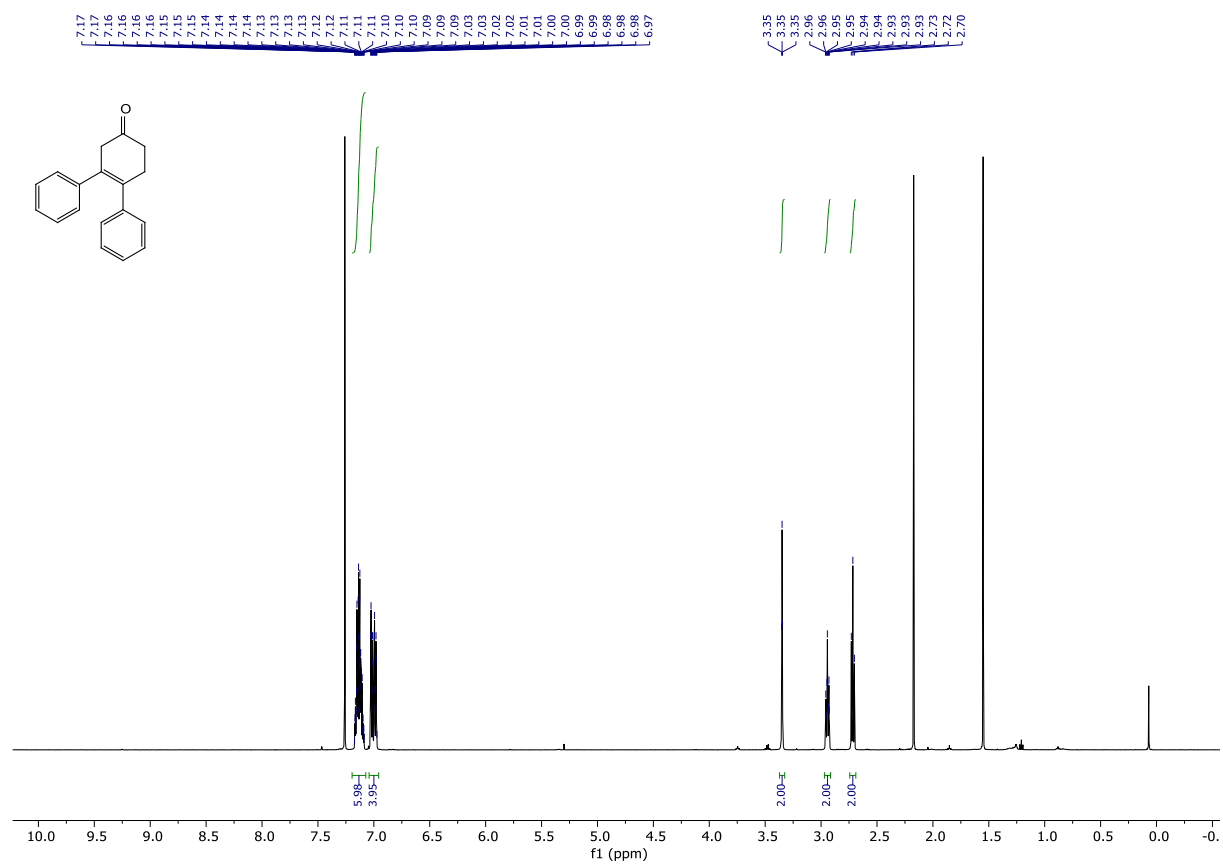

# <sup>13</sup>C NMR (126 MHz, CDCl<sub>3</sub>) of **1p**

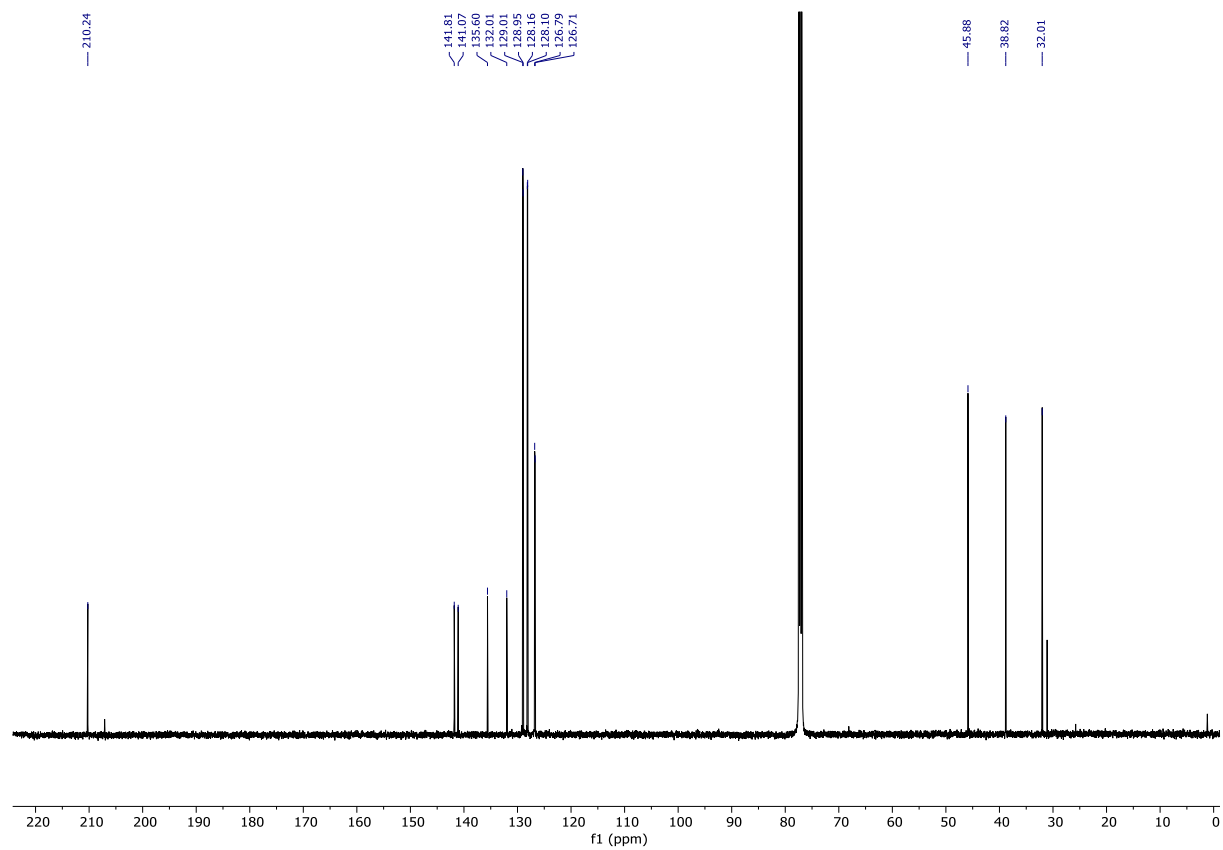



**<sup>1</sup>H NMR (500 MHz, Benzene-*d*<sub>6</sub>) of 1q**

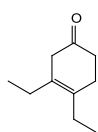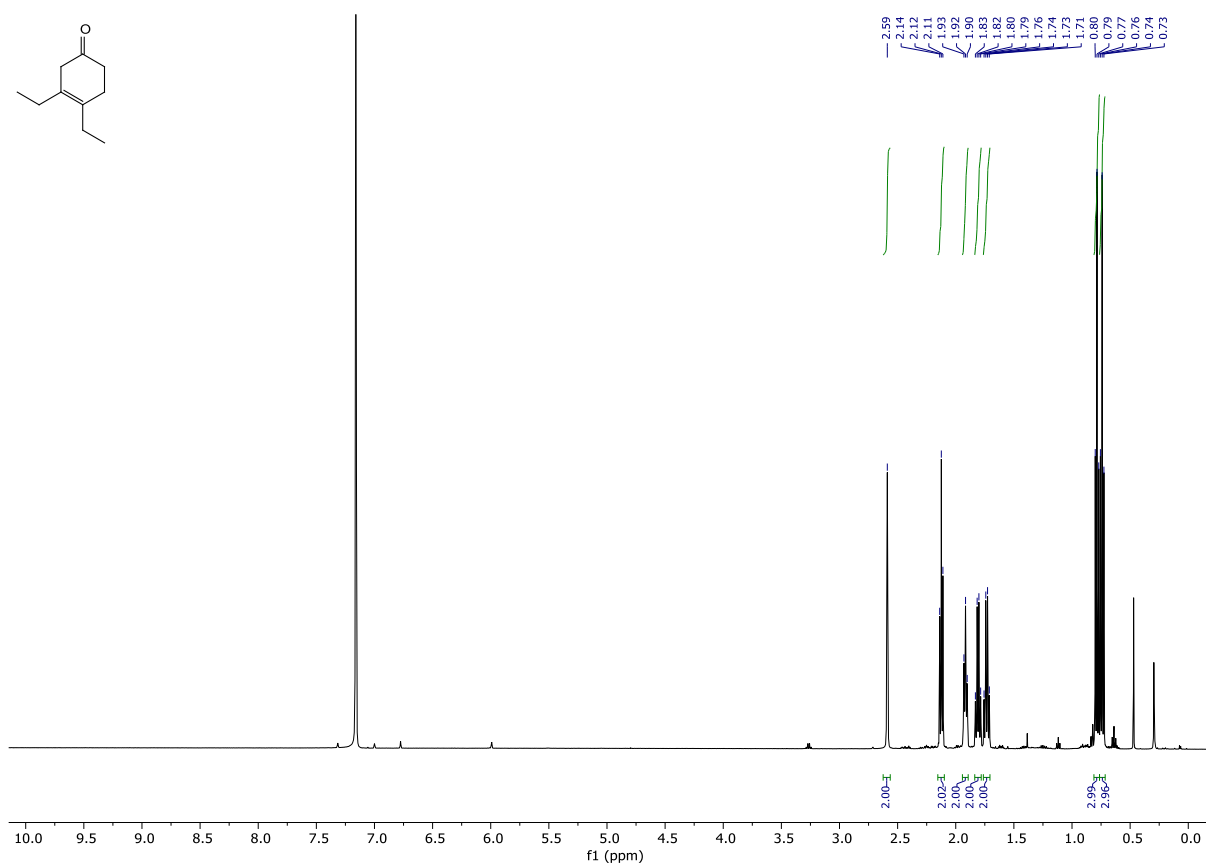

**<sup>13</sup>C NMR (126 MHz, Benzene-*d*<sub>6</sub>) of 1q**

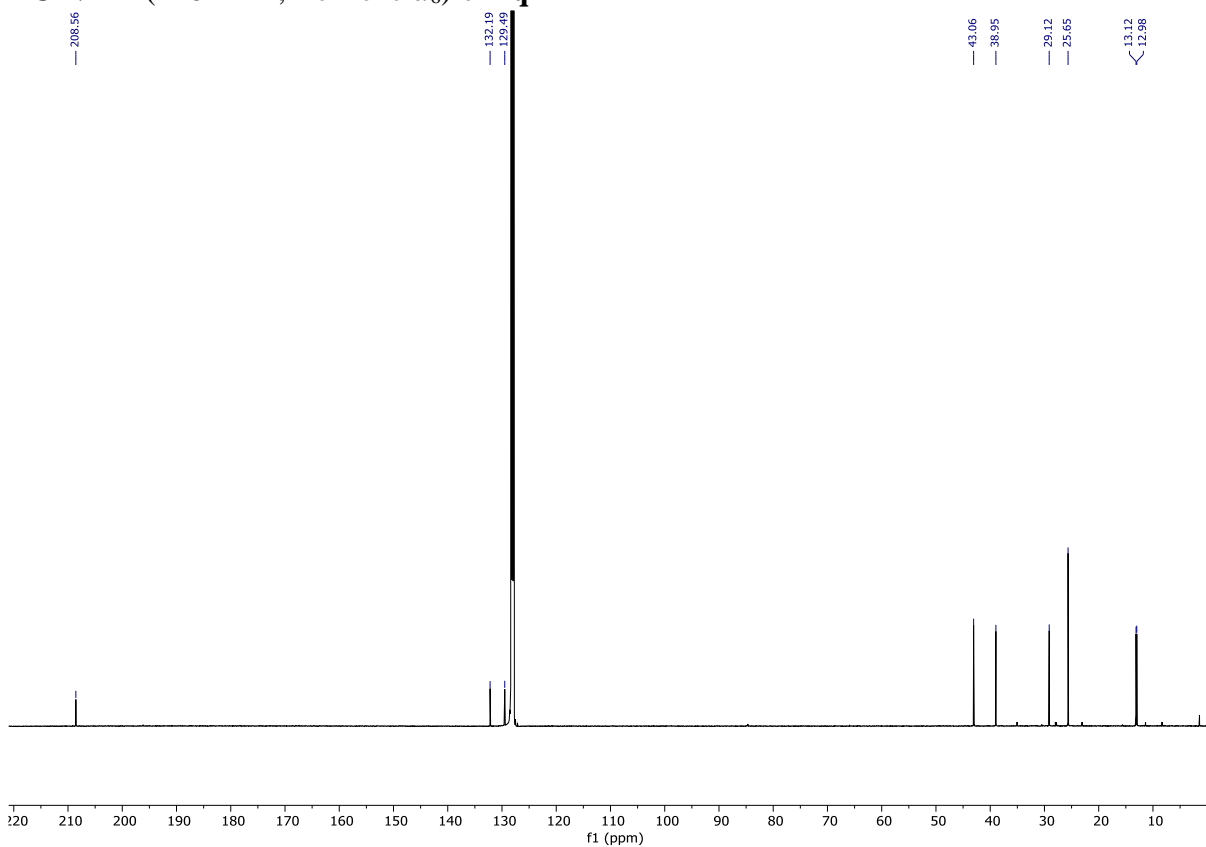

**<sup>1</sup>H NMR (400 MHz, Benzene-*d*<sub>6</sub>) of 1r**

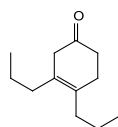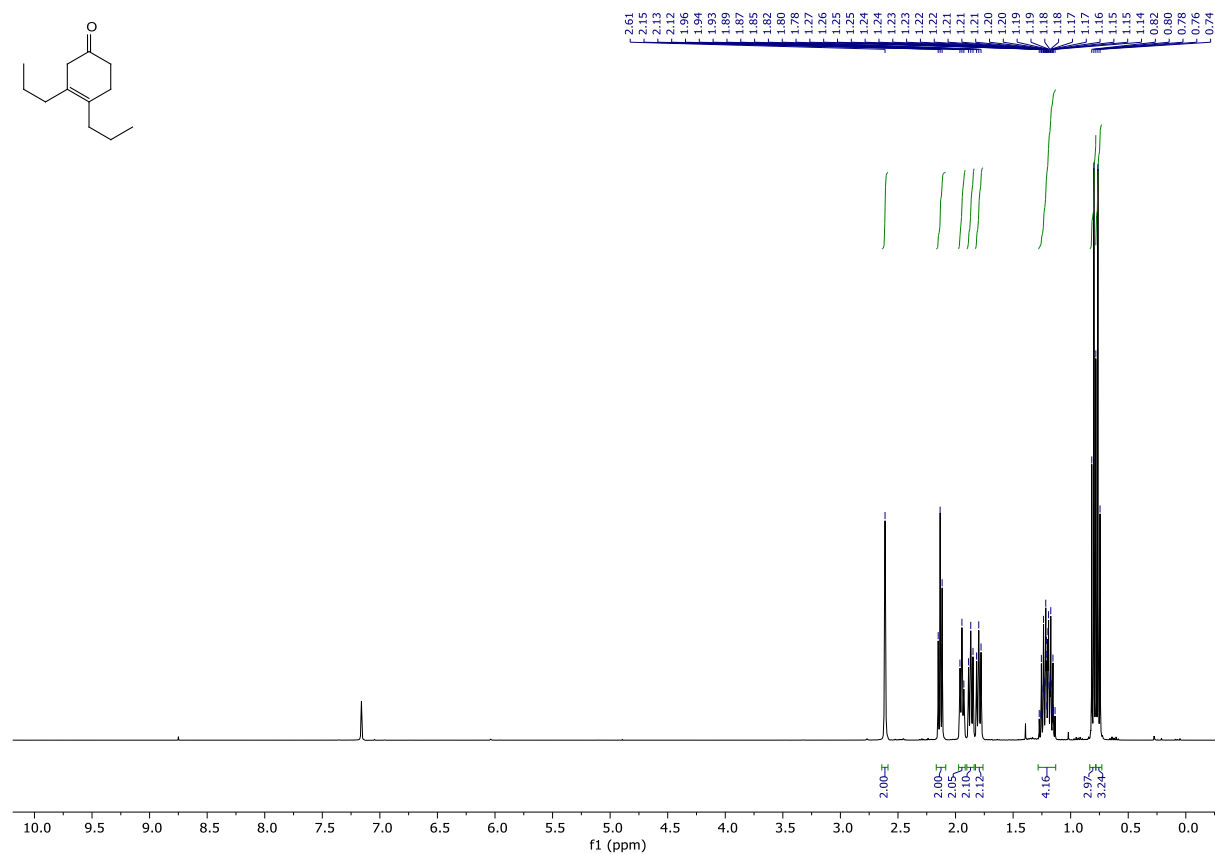

**<sup>13</sup>C NMR (101 MHz, Benzene-*d*<sub>6</sub>) of 1r**

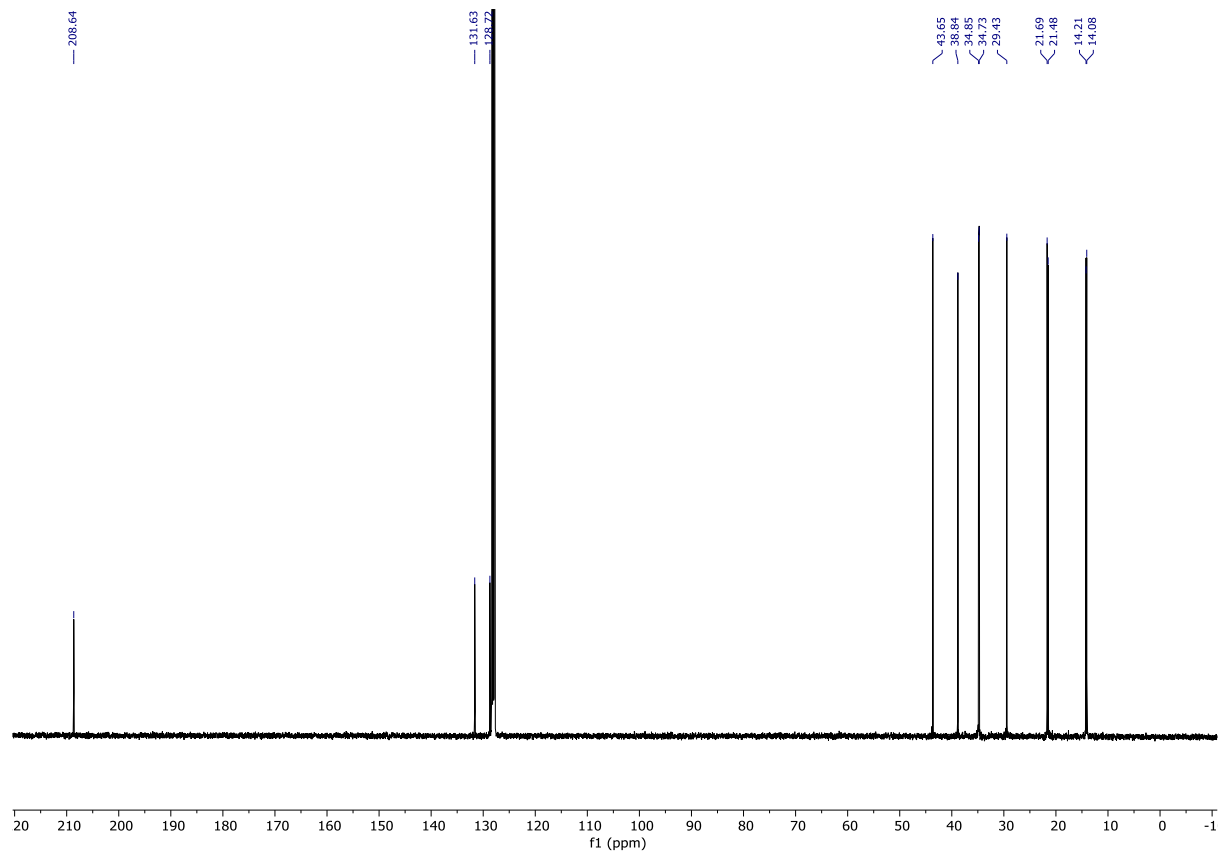

# <sup>1</sup>H NMR (400 MHz, Acetone-d<sub>6</sub>) of 1s

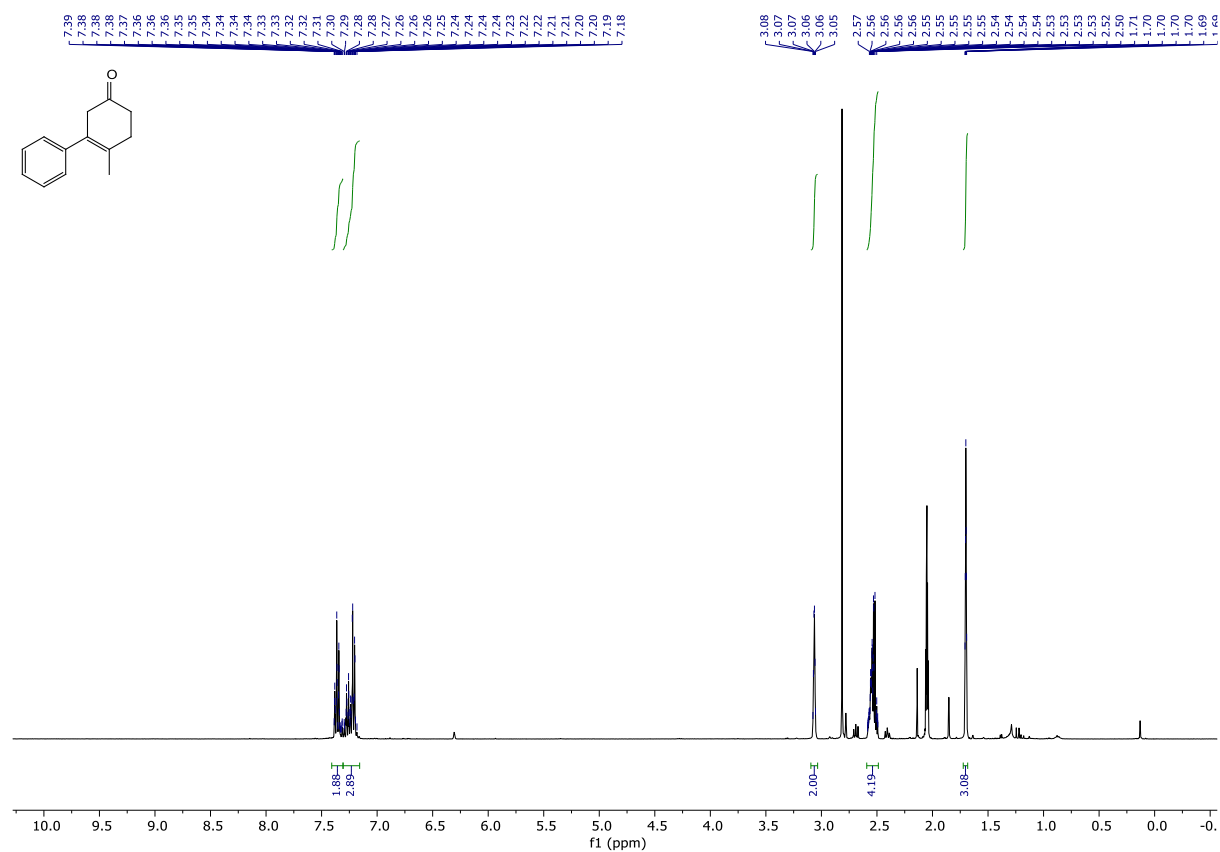

# <sup>13</sup>C NMR (126 MHz, Acetone-d<sub>6</sub>) of 1s

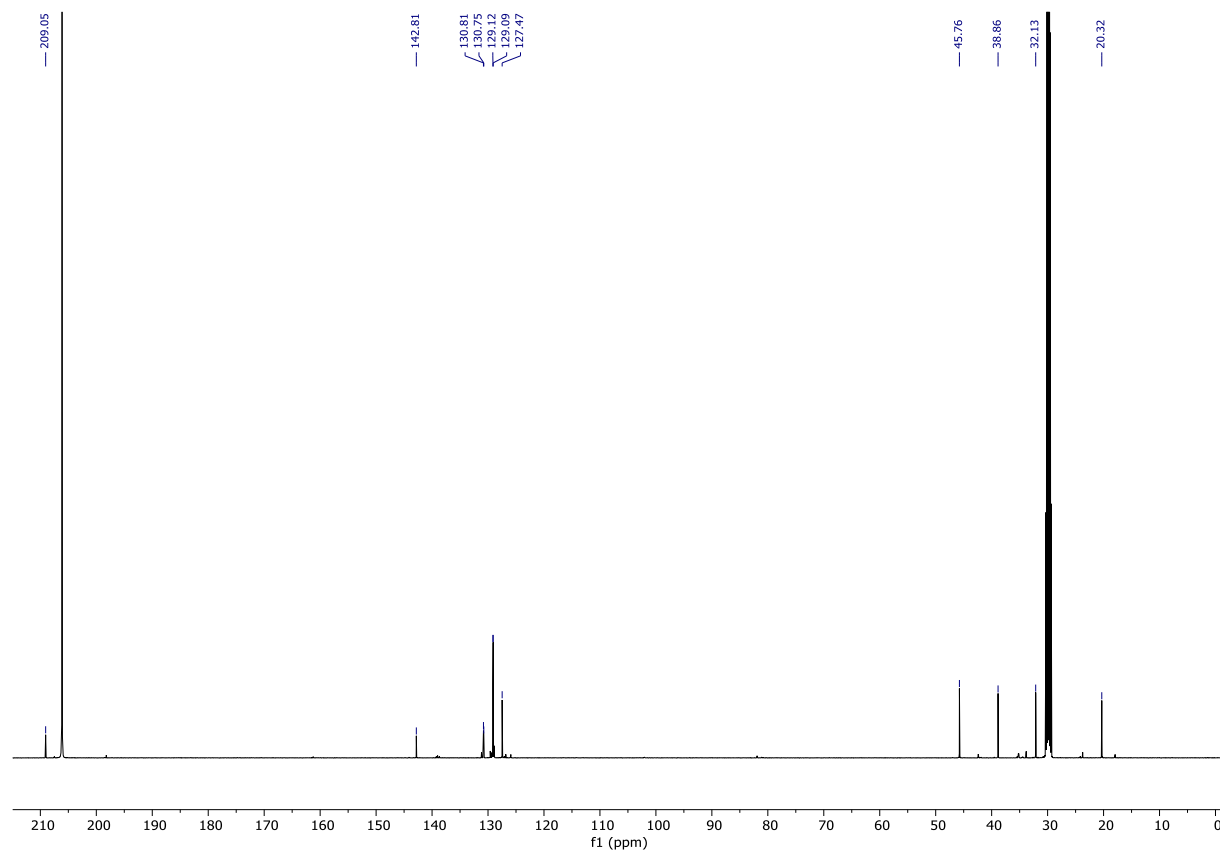



### $^1\text{H}$ NMR (400 MHz, $\text{CDCl}_3$ ) of **2a**

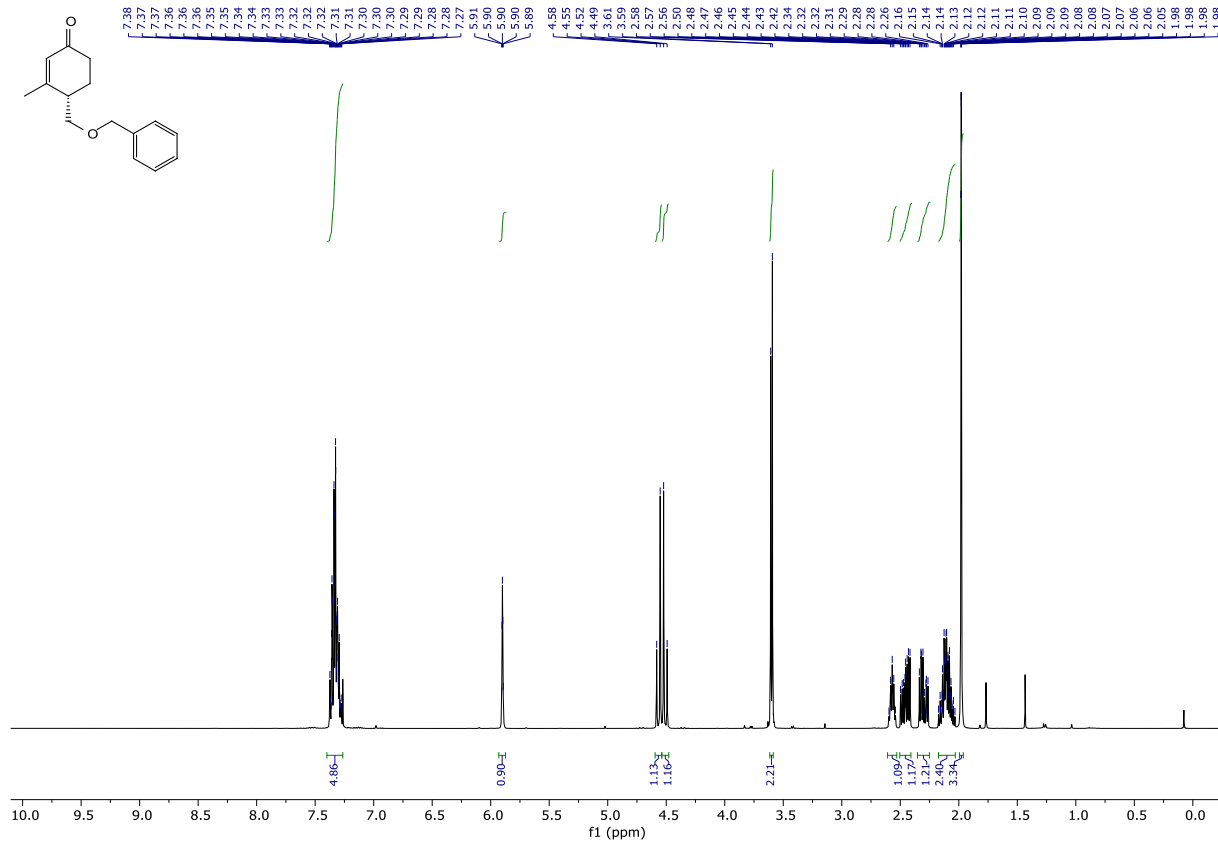

### $^{13}\text{C}$ NMR (101 MHz, $\text{CDCl}_3$ ) of **2a**

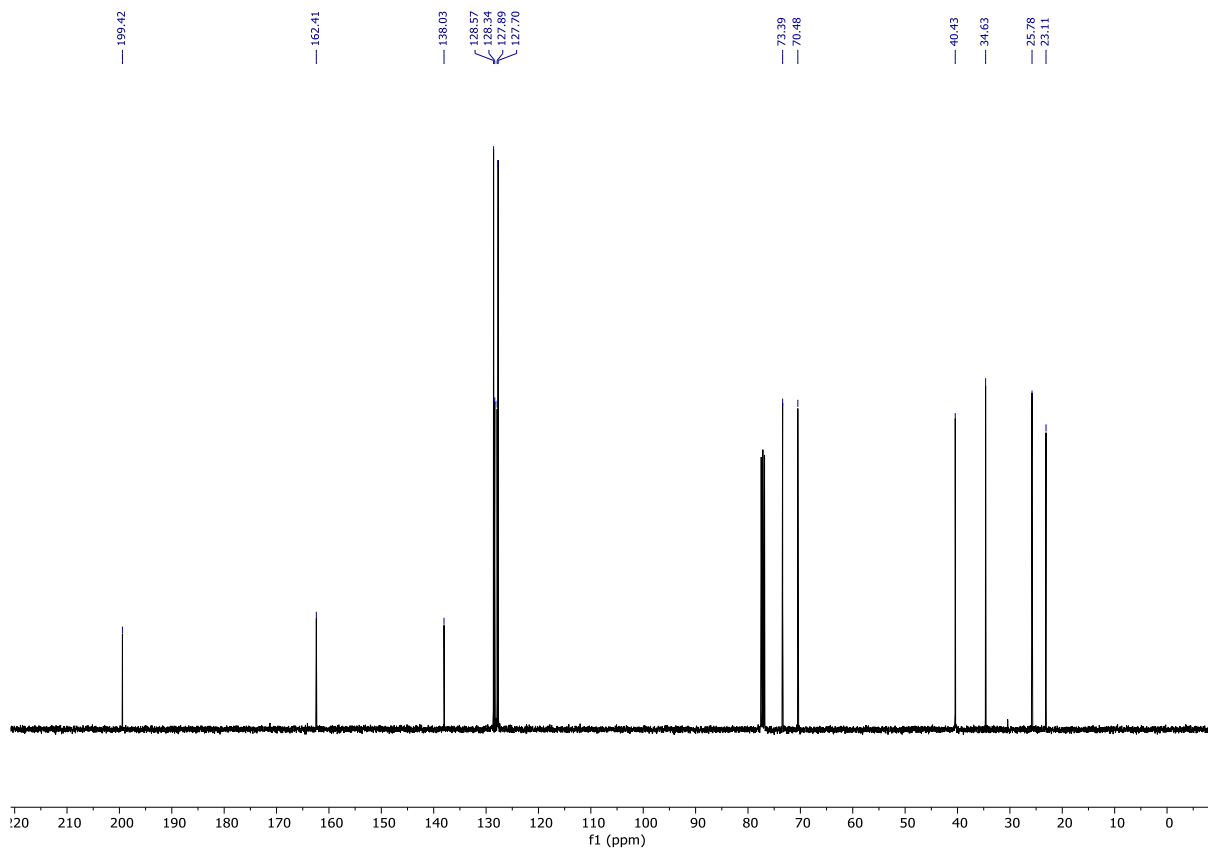

# <sup>1</sup>H NMR (500 MHz, Benzene-*d*<sub>6</sub>) of **2b**

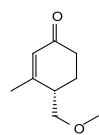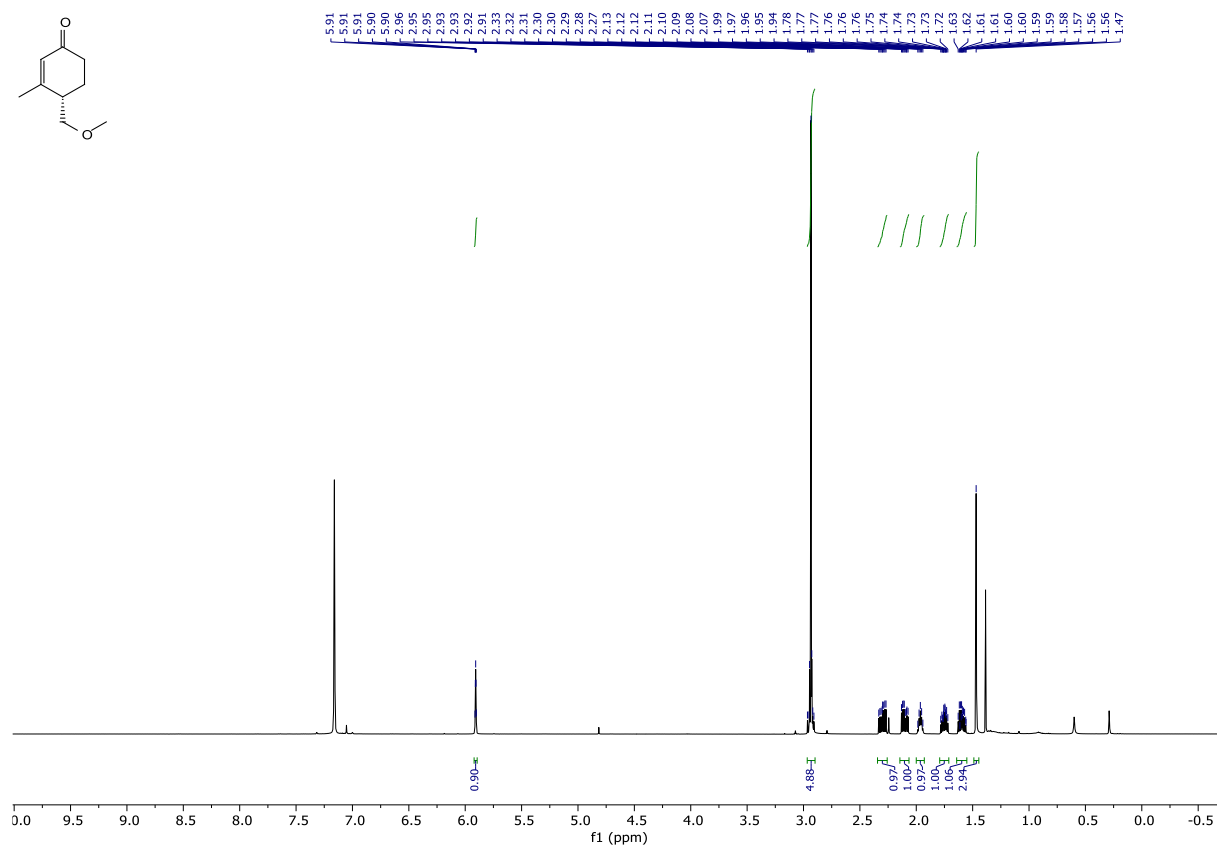

# <sup>13</sup>C NMR (126 MHz, Benzene-*d*<sub>6</sub>) of **2b**

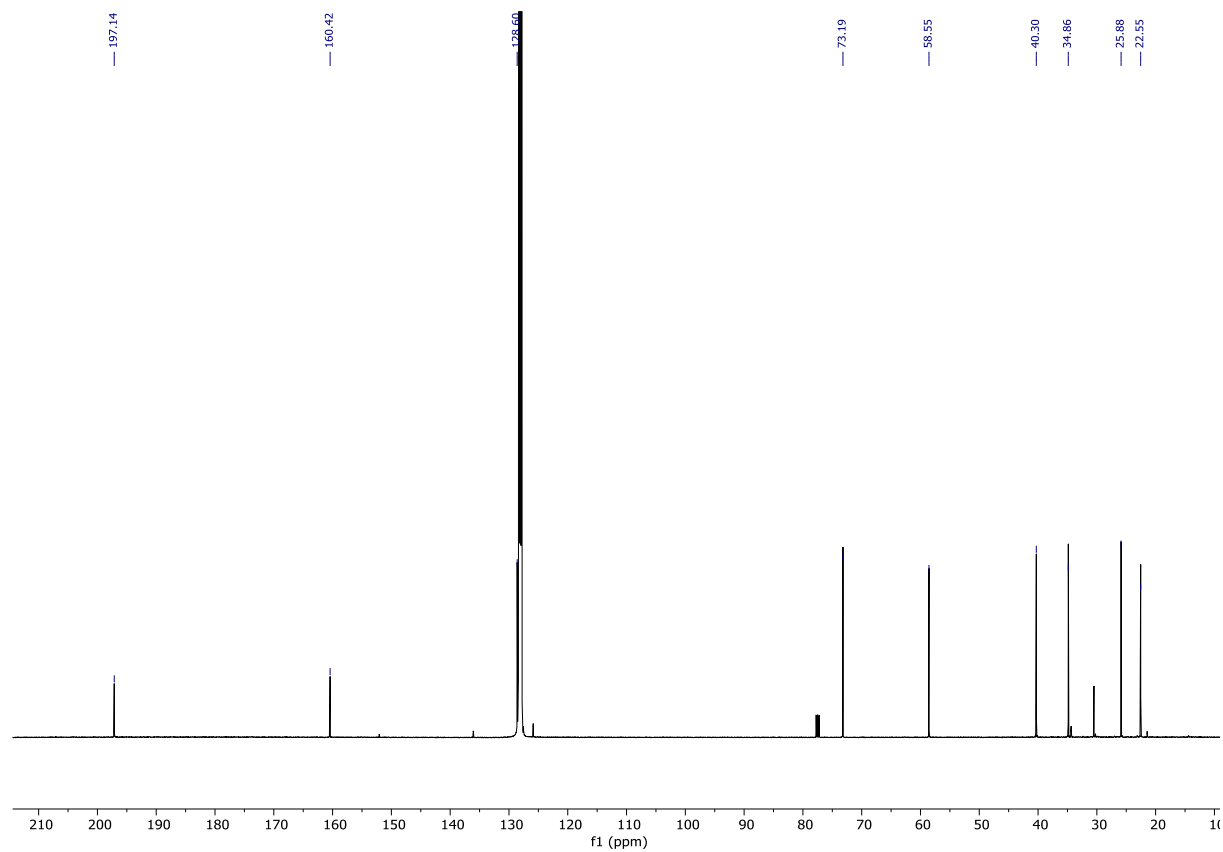

# <sup>1</sup>H NMR (400 MHz, CDCl<sub>3</sub>) of 2c

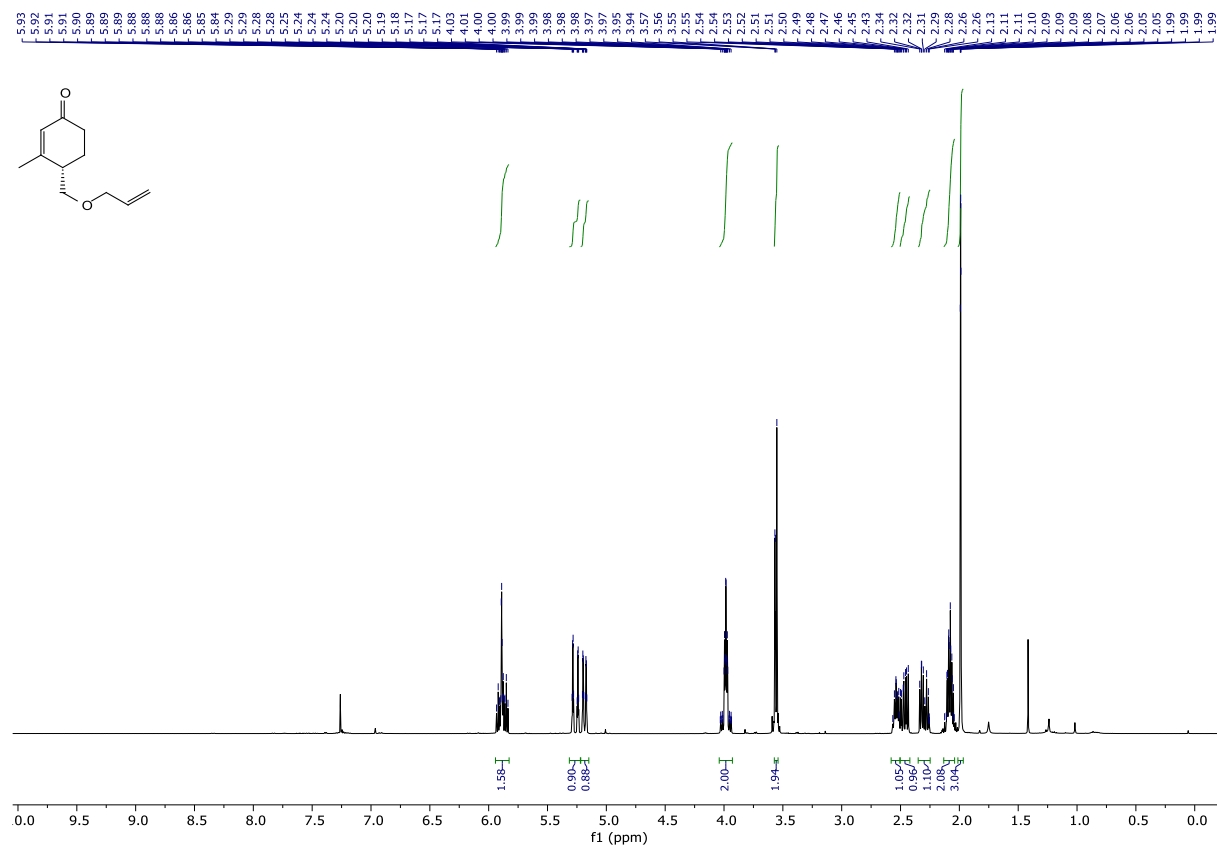

# <sup>13</sup>C NMR (101 MHz, CDCl<sub>3</sub>) of 2c

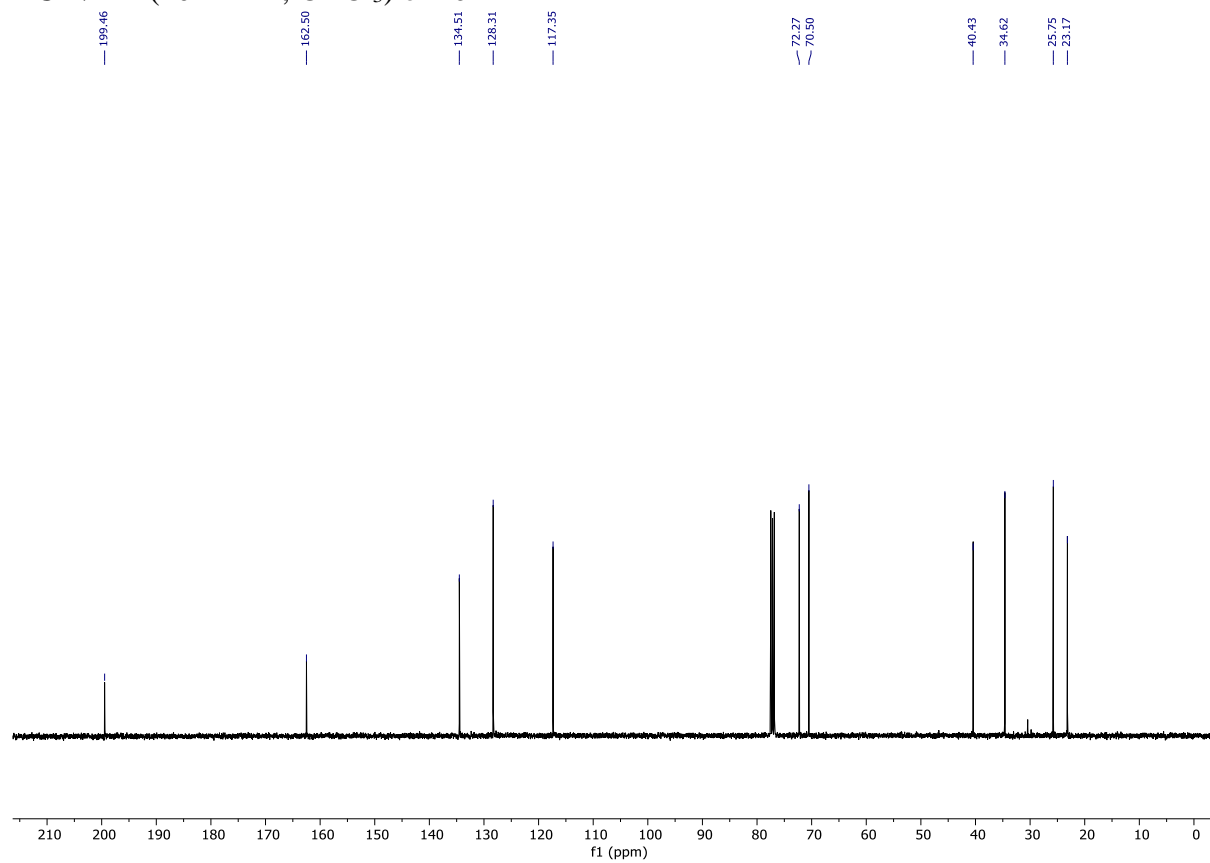





# <sup>1</sup>H NMR (400 MHz, Benzene-*d*<sub>6</sub>) of **2e**

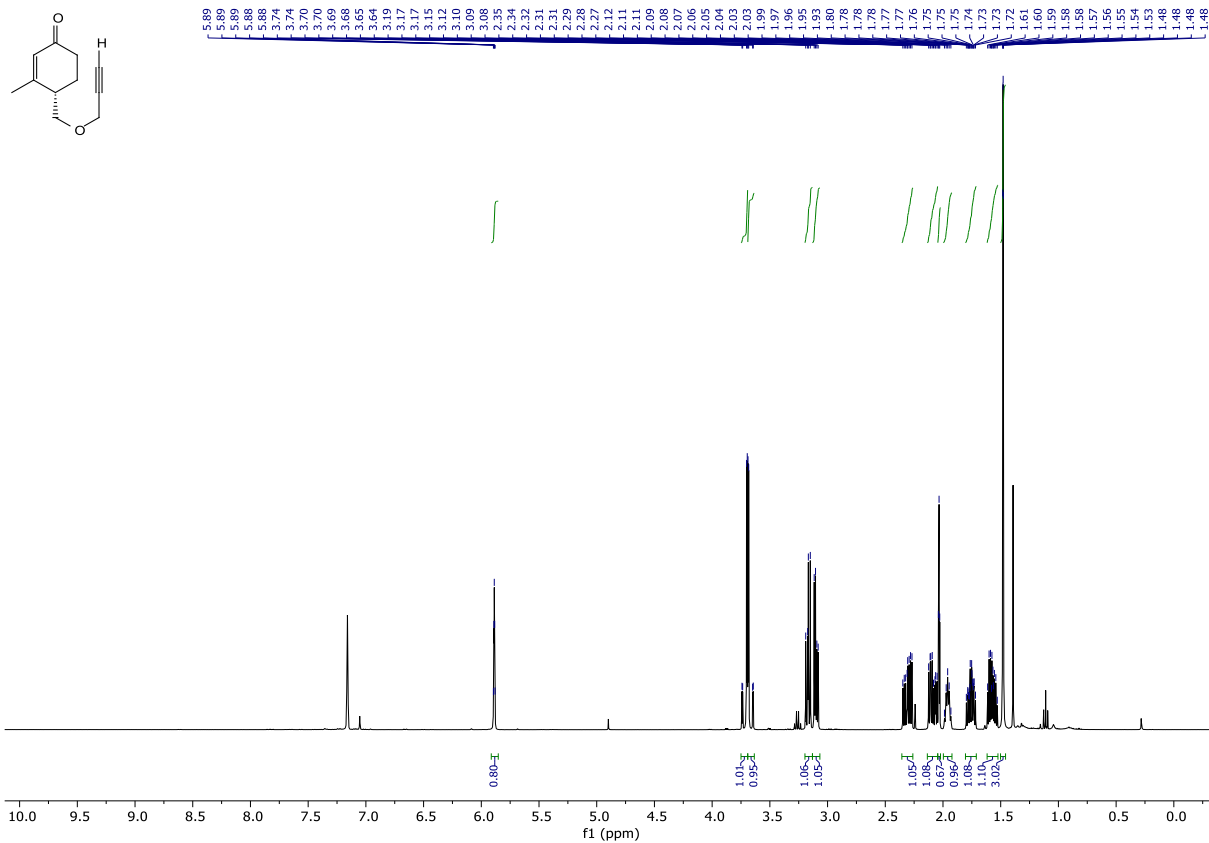

# <sup>13</sup>C NMR (101 MHz, Benzene-*d*<sub>6</sub>) of **2e**

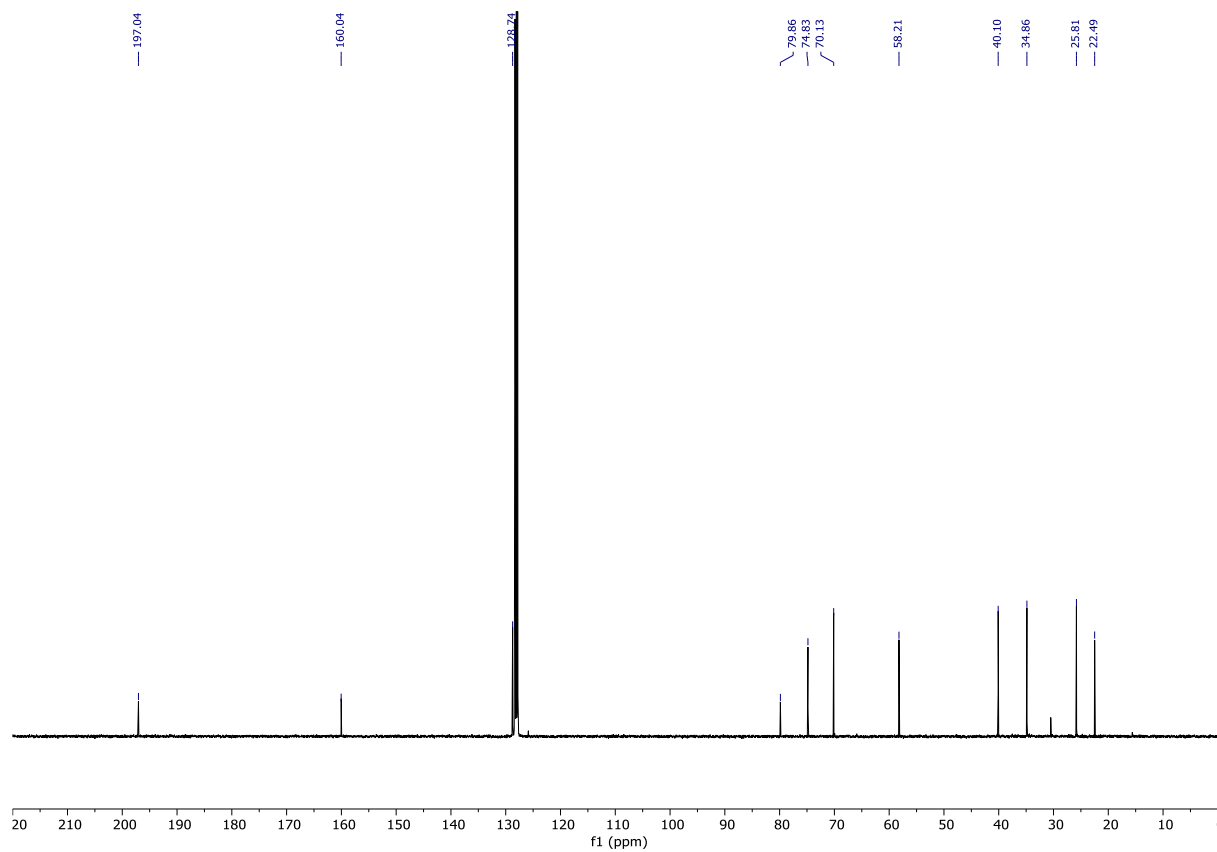

# <sup>1</sup>H NMR (500 MHz, Acetone-*d*<sub>6</sub>) of **2f**

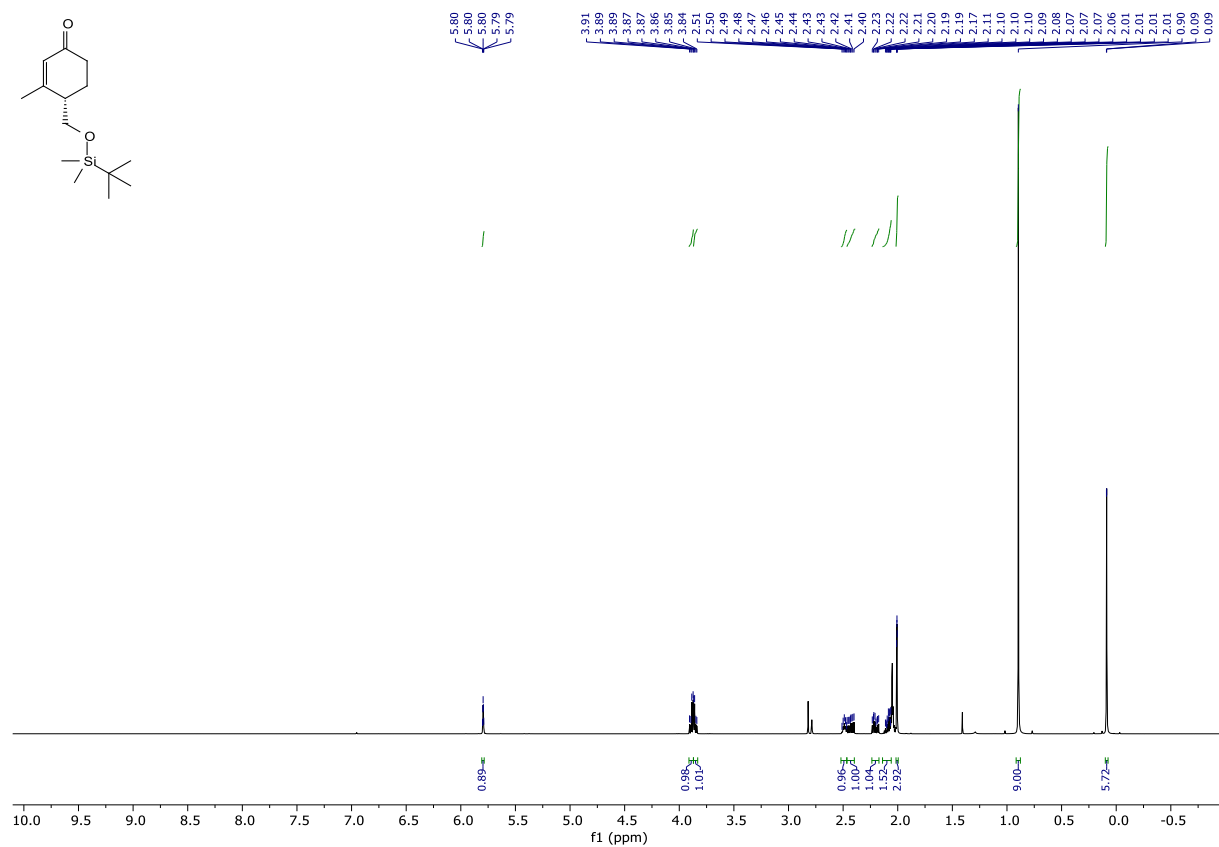

# <sup>13</sup>C NMR (126 MHz, Acetone-*d*<sub>6</sub>) of **2f**

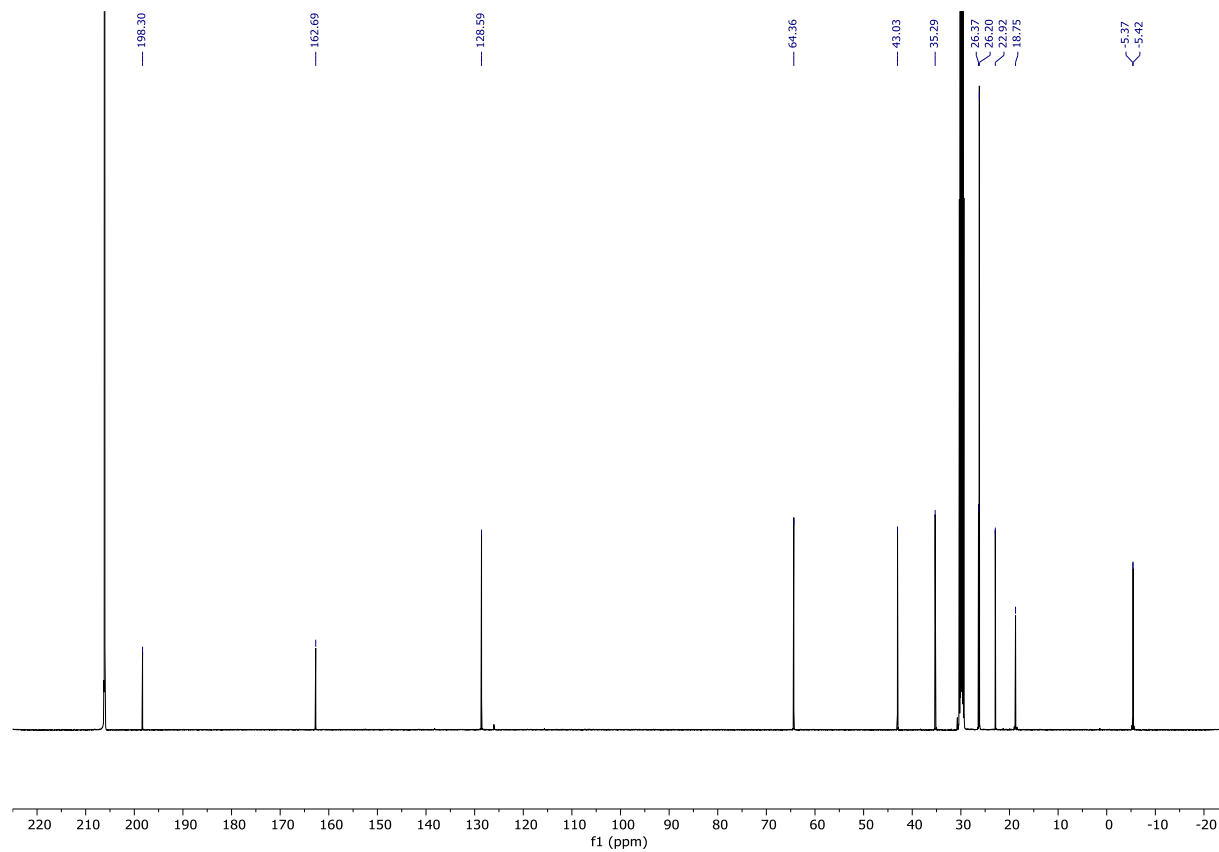

# $^1\text{H}$ NMR (400 MHz, $\text{CDCl}_3$ ) of **2g**

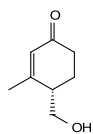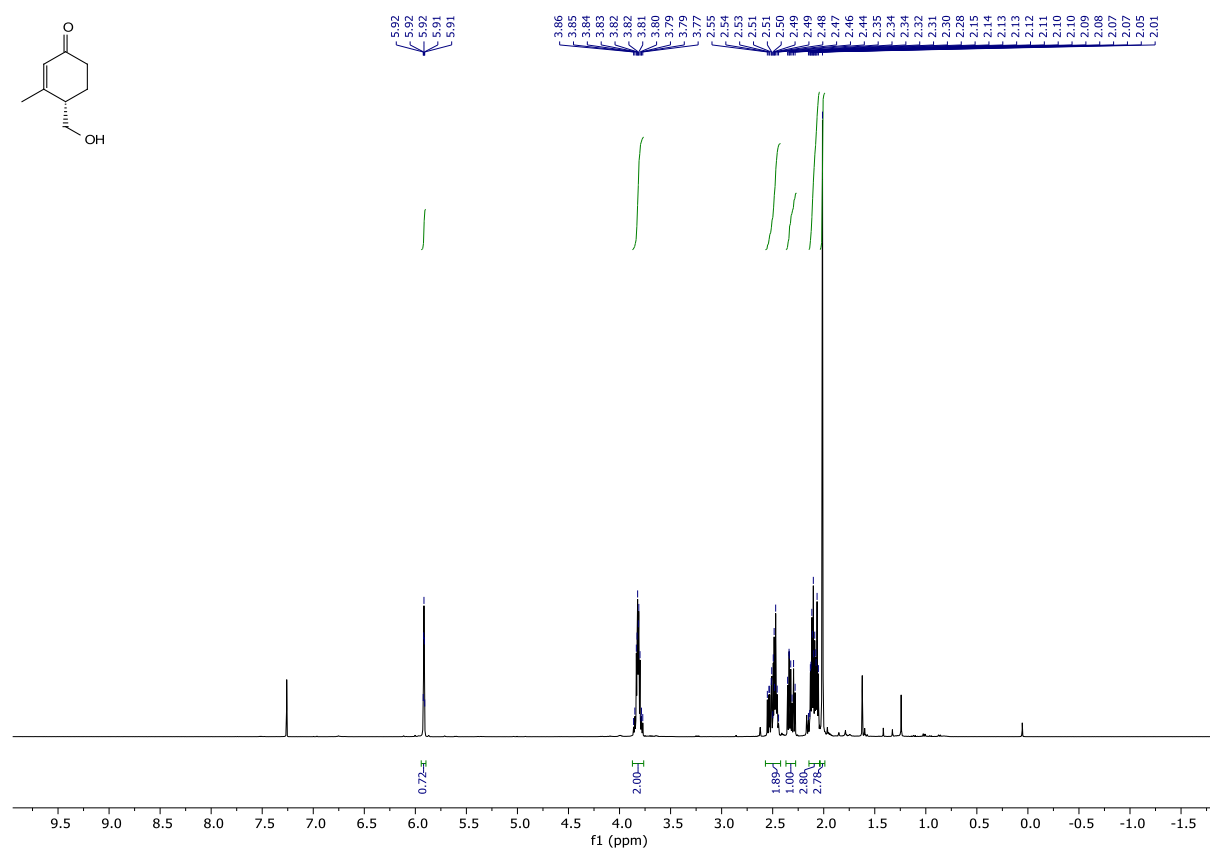

# $^{13}\text{C}$ NMR (101 MHz, $\text{CDCl}_3$ ) of **2g**

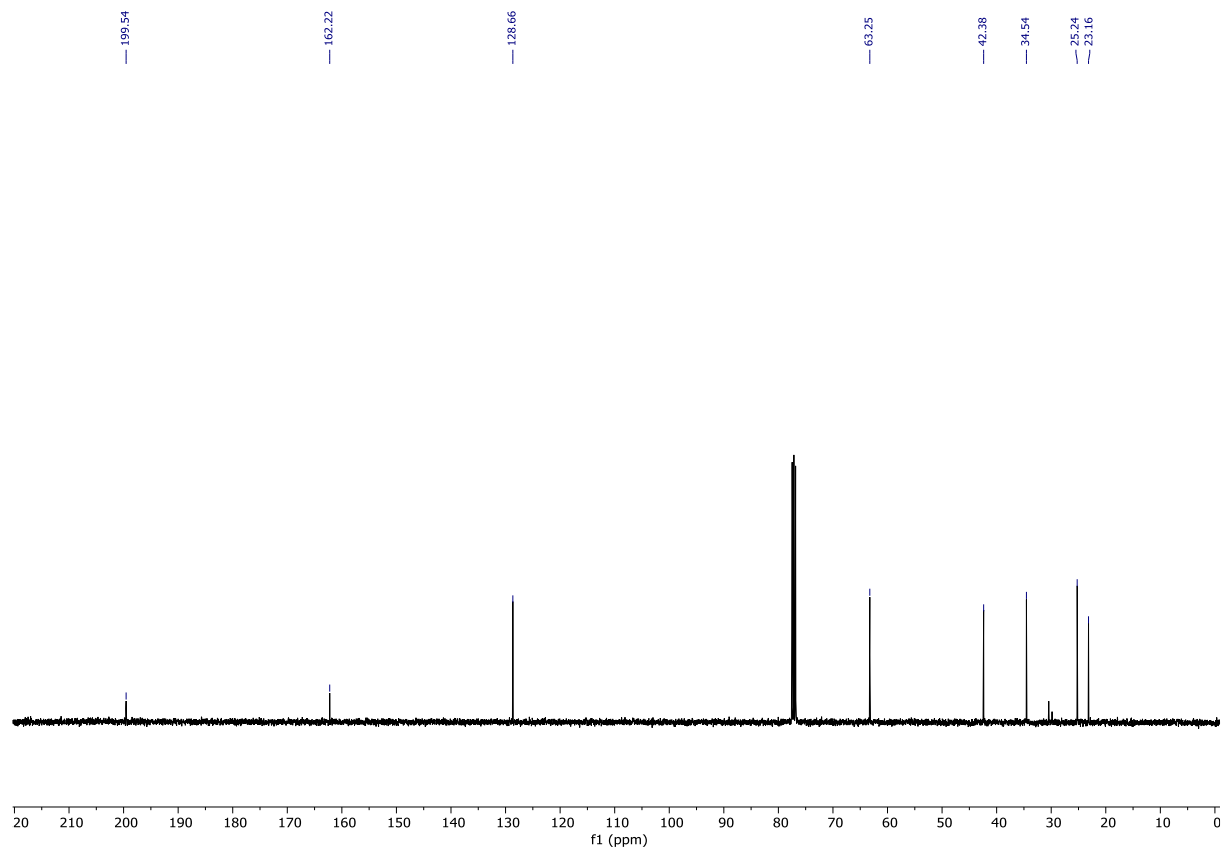

# <sup>1</sup>H NMR (400 MHz, CDCl<sub>3</sub>) of 2h

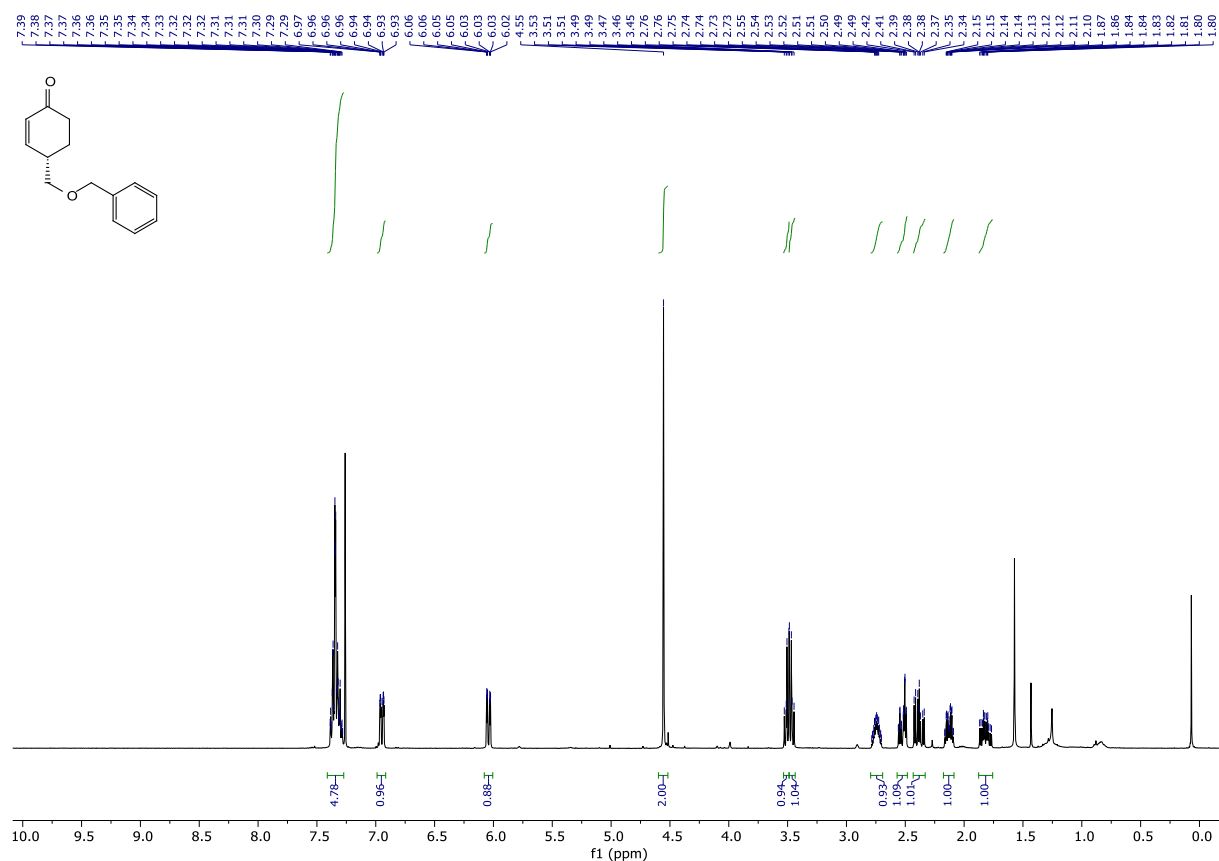

# <sup>13</sup>C NMR (101 MHz, CDCl<sub>3</sub>) of 2h

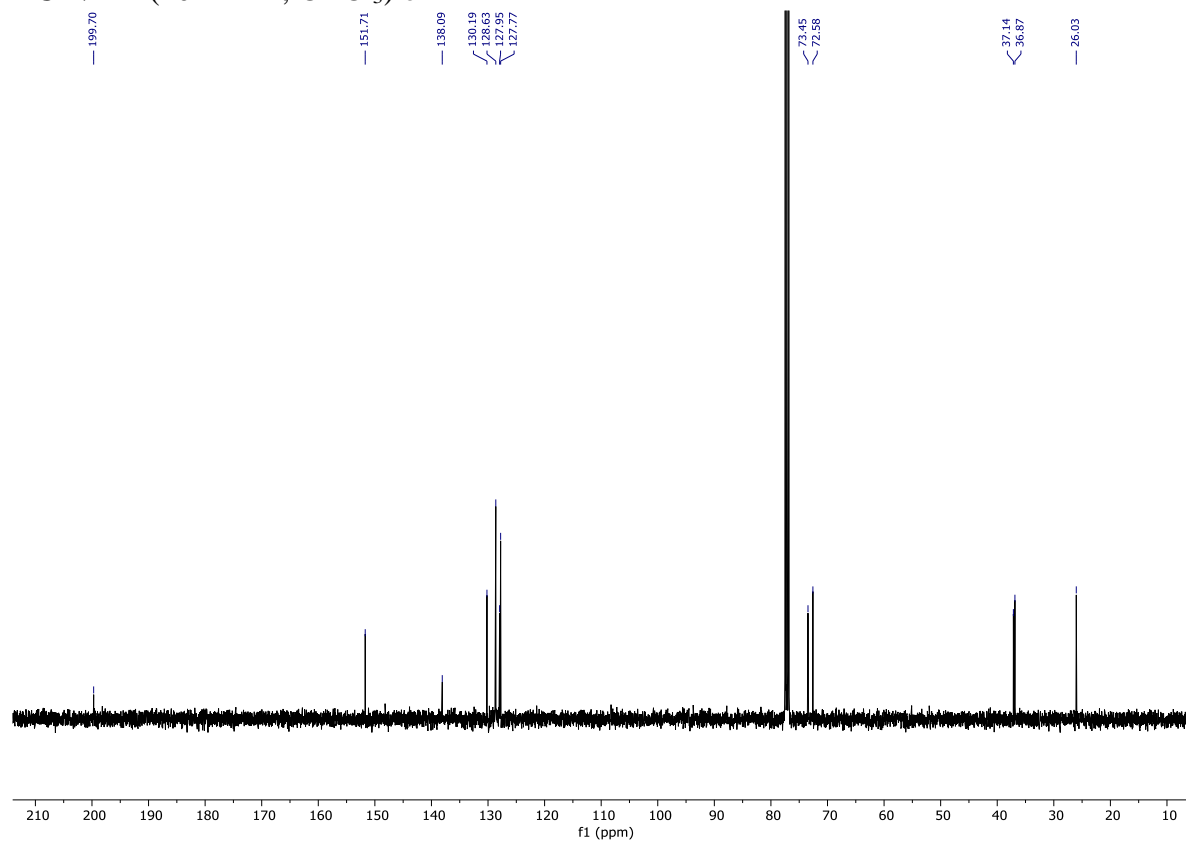

### $^1\text{H}$ NMR (500 MHz, Acetone- $d_6$ ) of **2i**

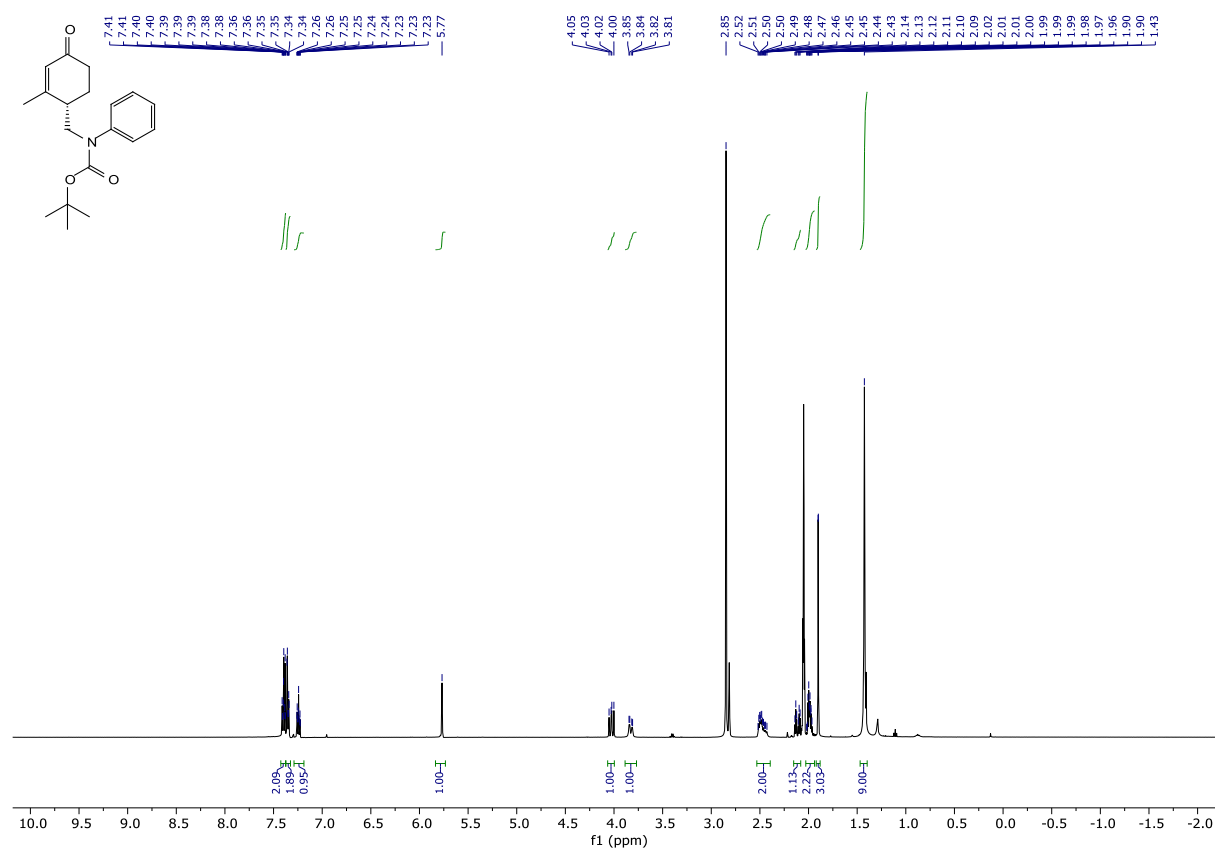

### $^{13}\text{C}$ NMR (126 MHz, Acetone- $d_6$ ) of **2i**

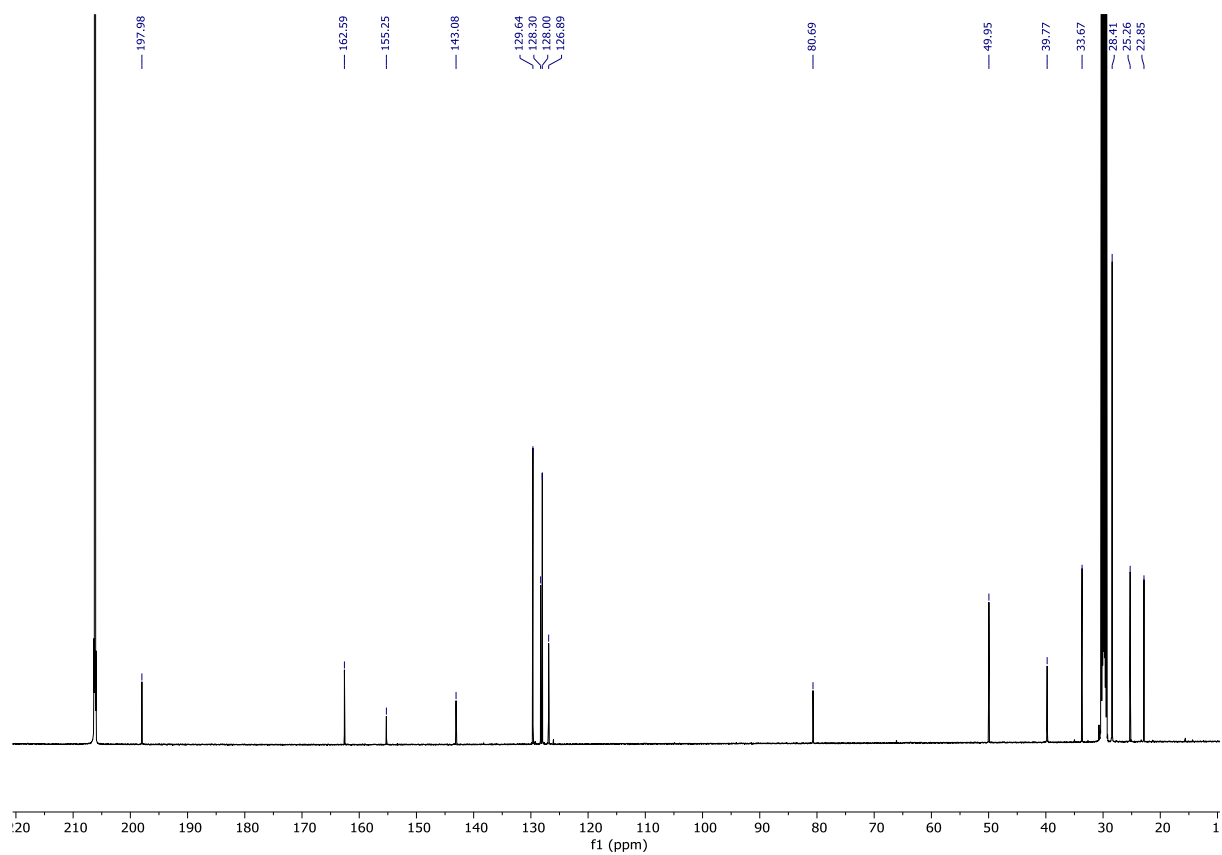

**<sup>1</sup>H NMR (500 MHz, Toluene-*d*<sub>8</sub>, 363 K) of **2j****

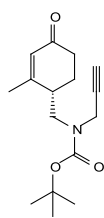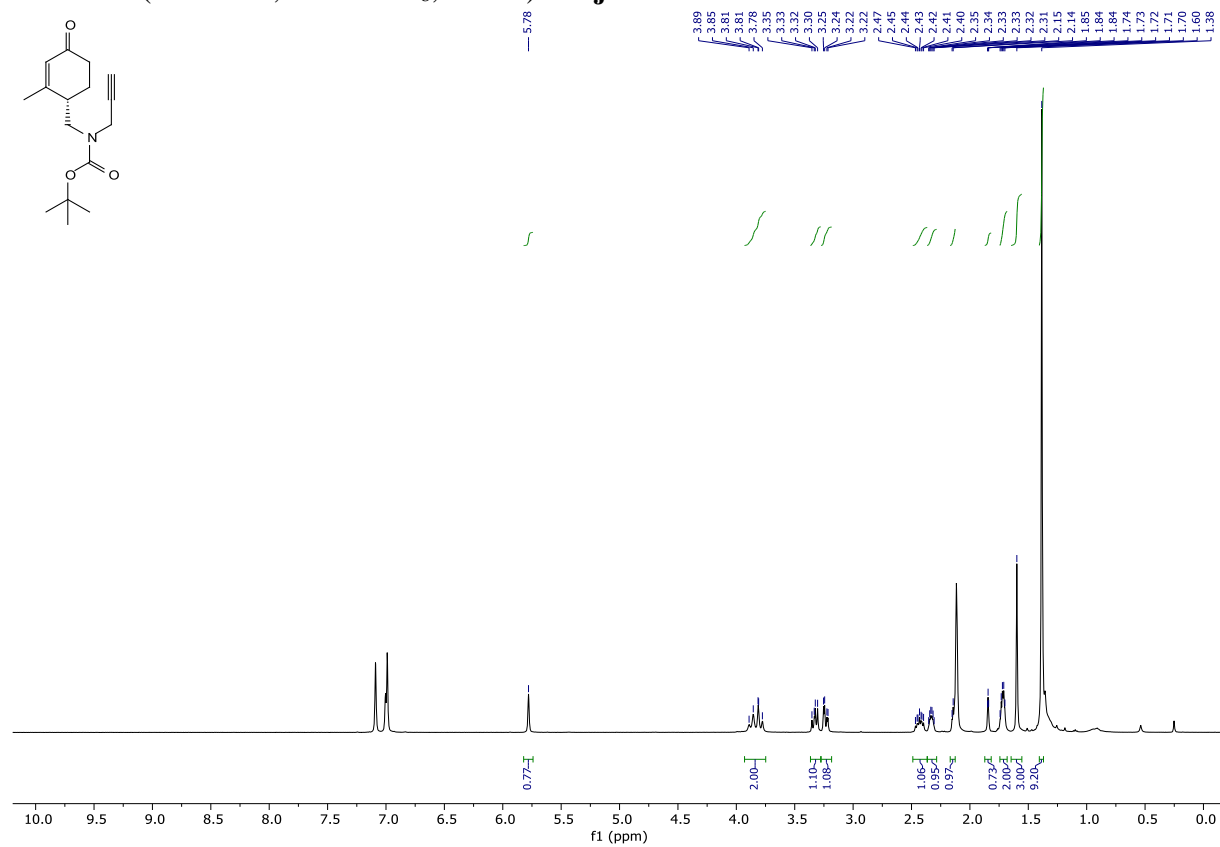

**<sup>13</sup>C NMR (126 MHz, Toluene-*d*<sub>8</sub>, 363 K) of **2j****

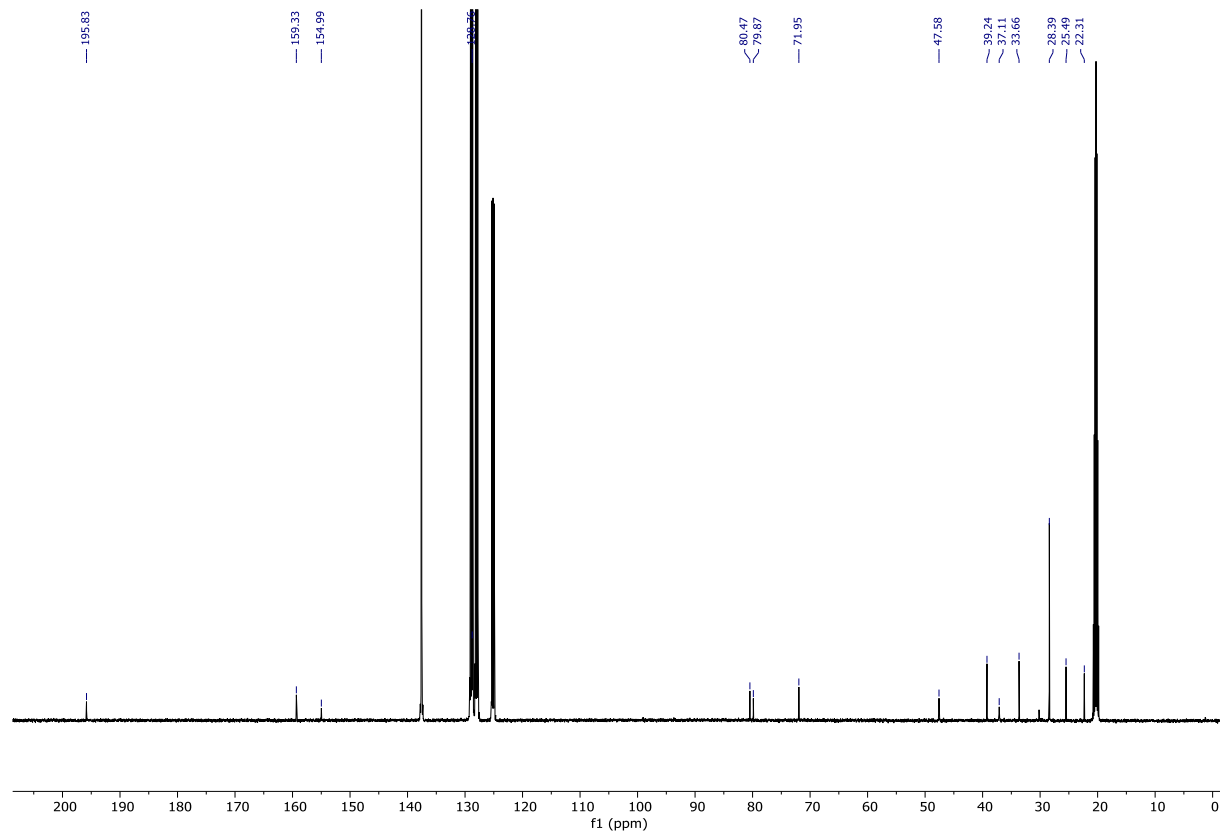

# <sup>1</sup>H NMR (400 MHz, Methanol-*d*<sub>4</sub>) of 2k

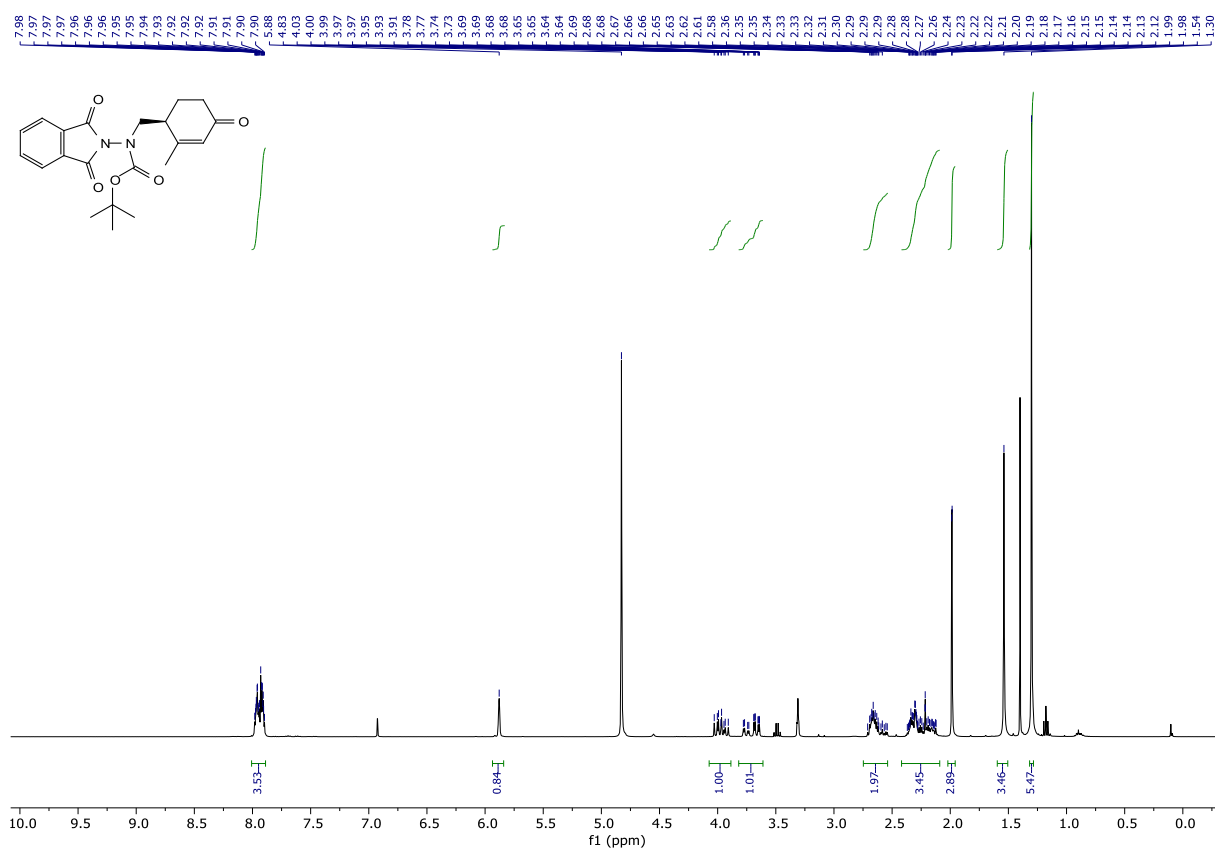

# <sup>13</sup>C NMR (101 MHz, Methanol-*d*<sub>4</sub>) of 2k

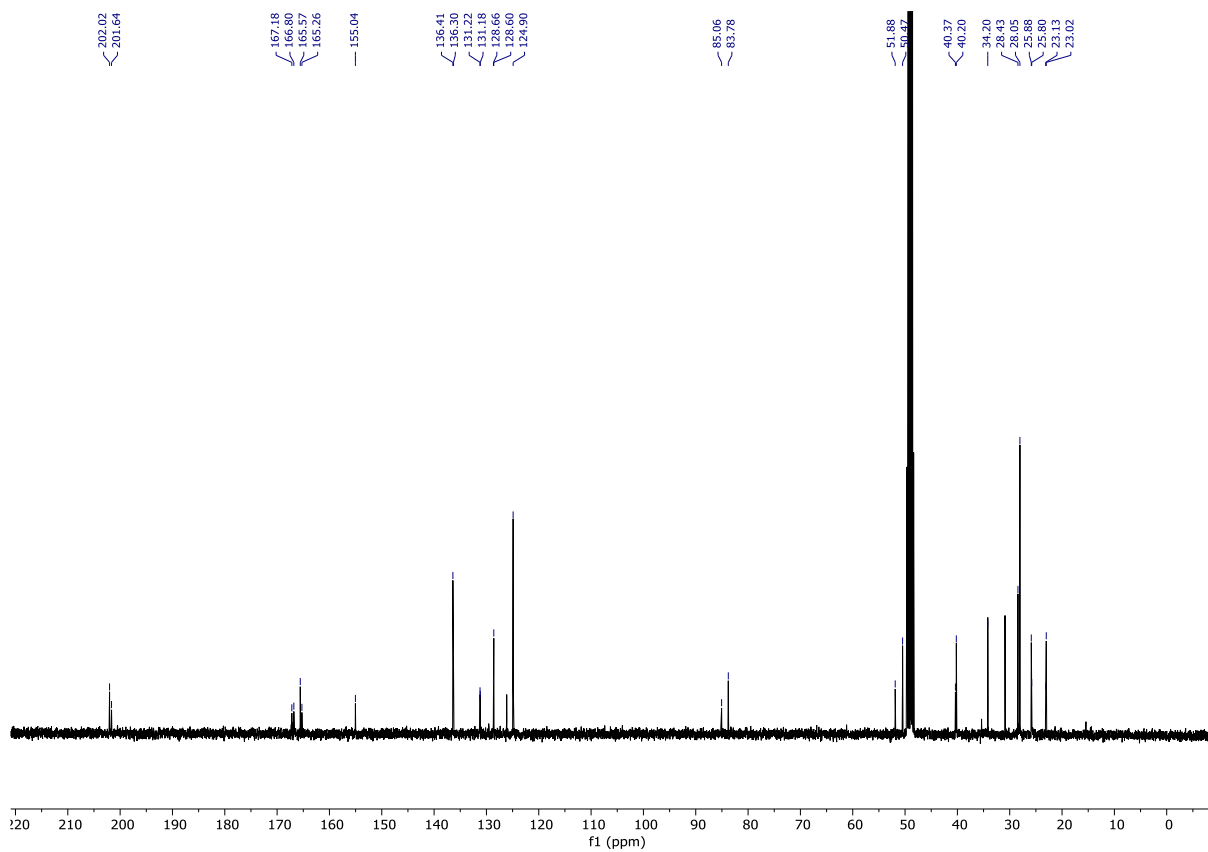





# <sup>1</sup>H NMR (500 MHz, CDCl<sub>3</sub>) of 2m

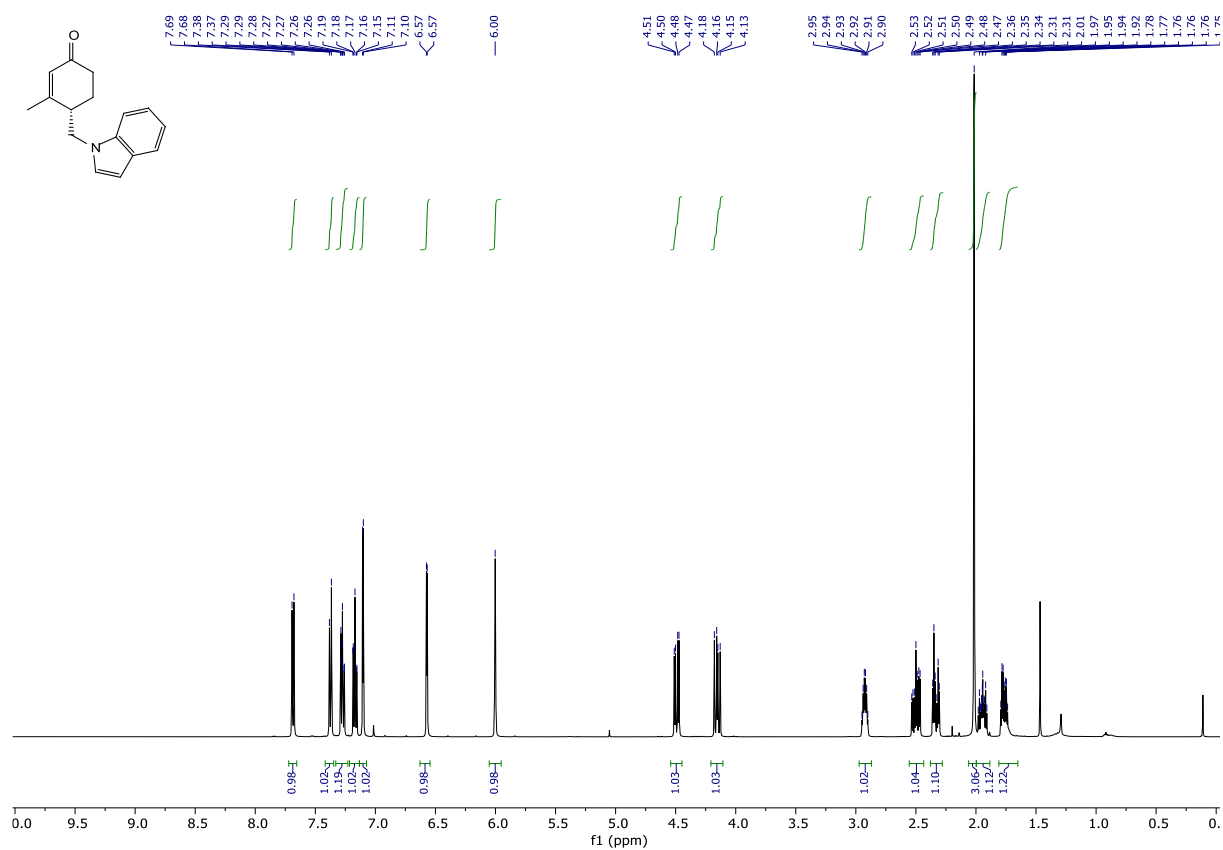

# <sup>13</sup>C NMR (126 MHz, CDCl<sub>3</sub>) of 2m

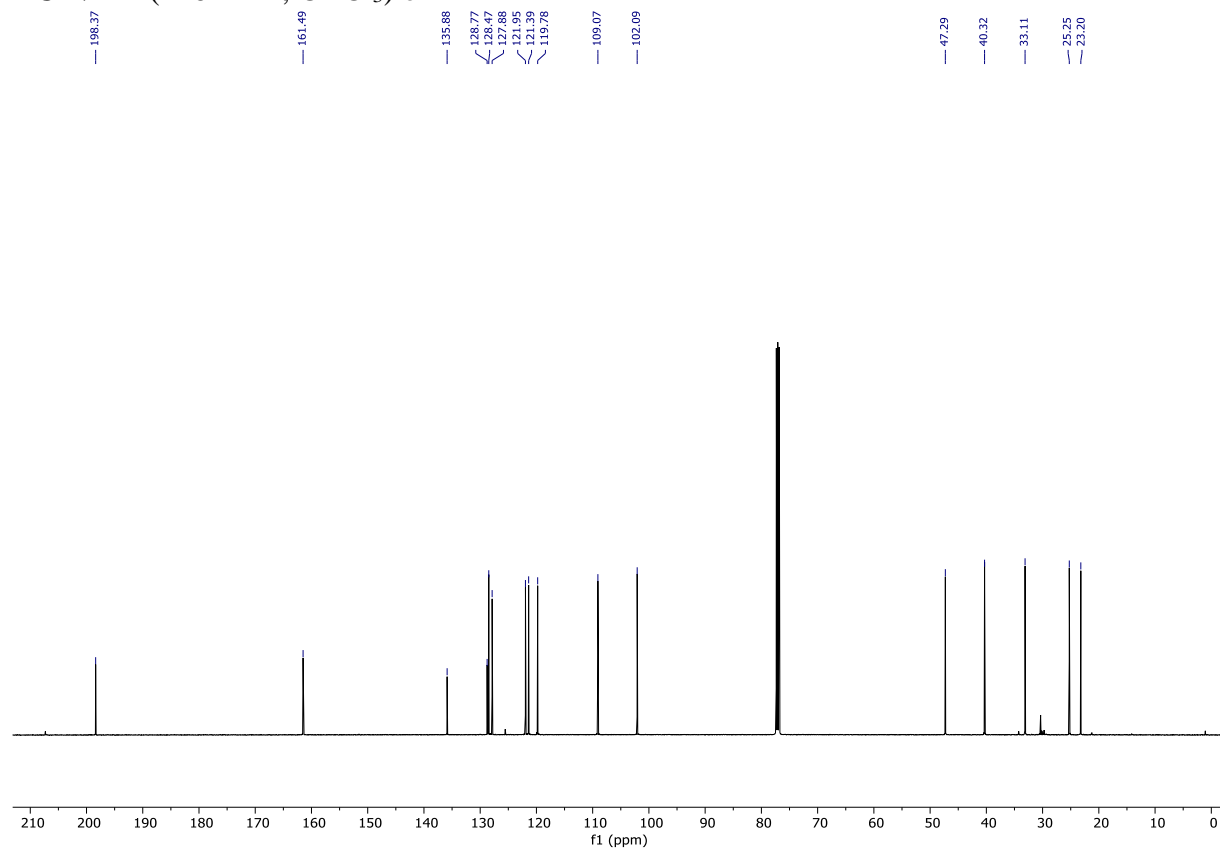



### $^1\text{H}$ NMR (400 MHz, $\text{CDCl}_3$ ) of **20**

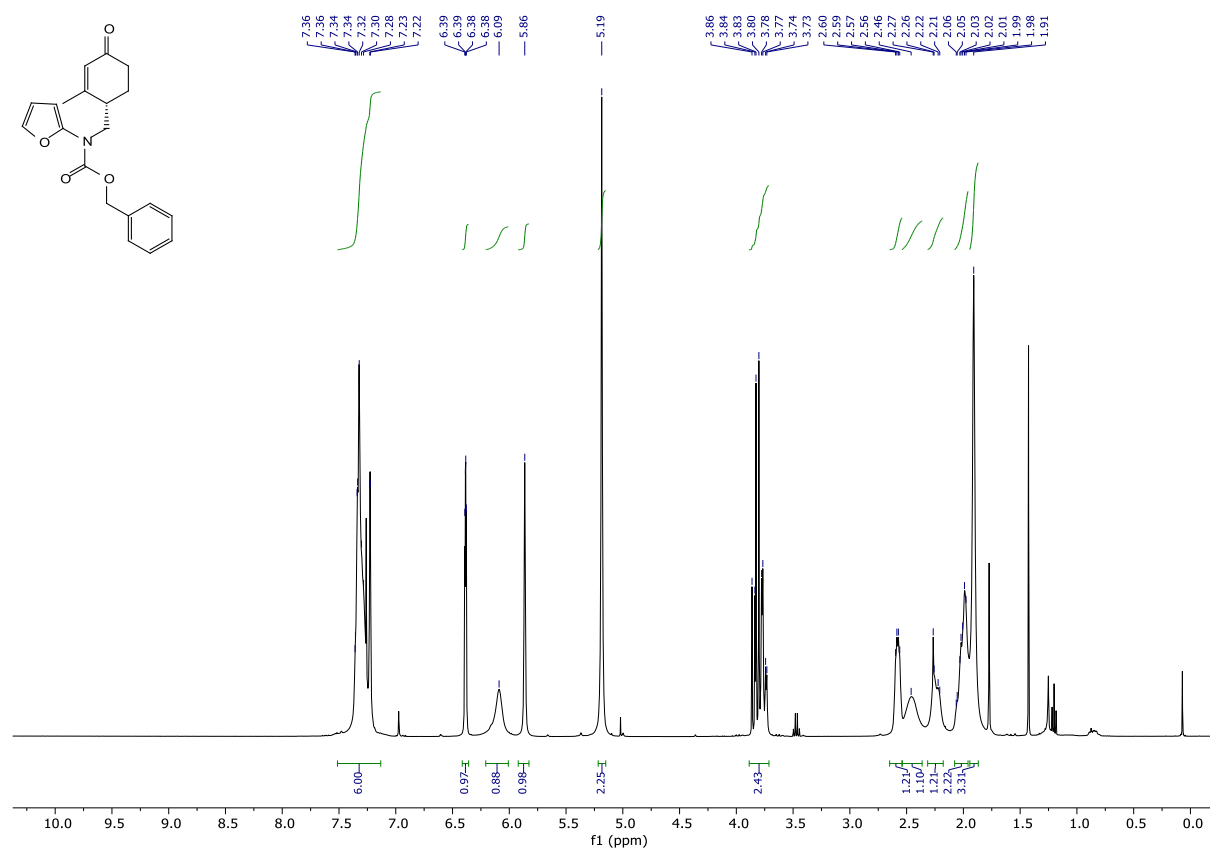

### $^{13}\text{C}$ NMR (101 MHz, $\text{CDCl}_3$ ) of **20**

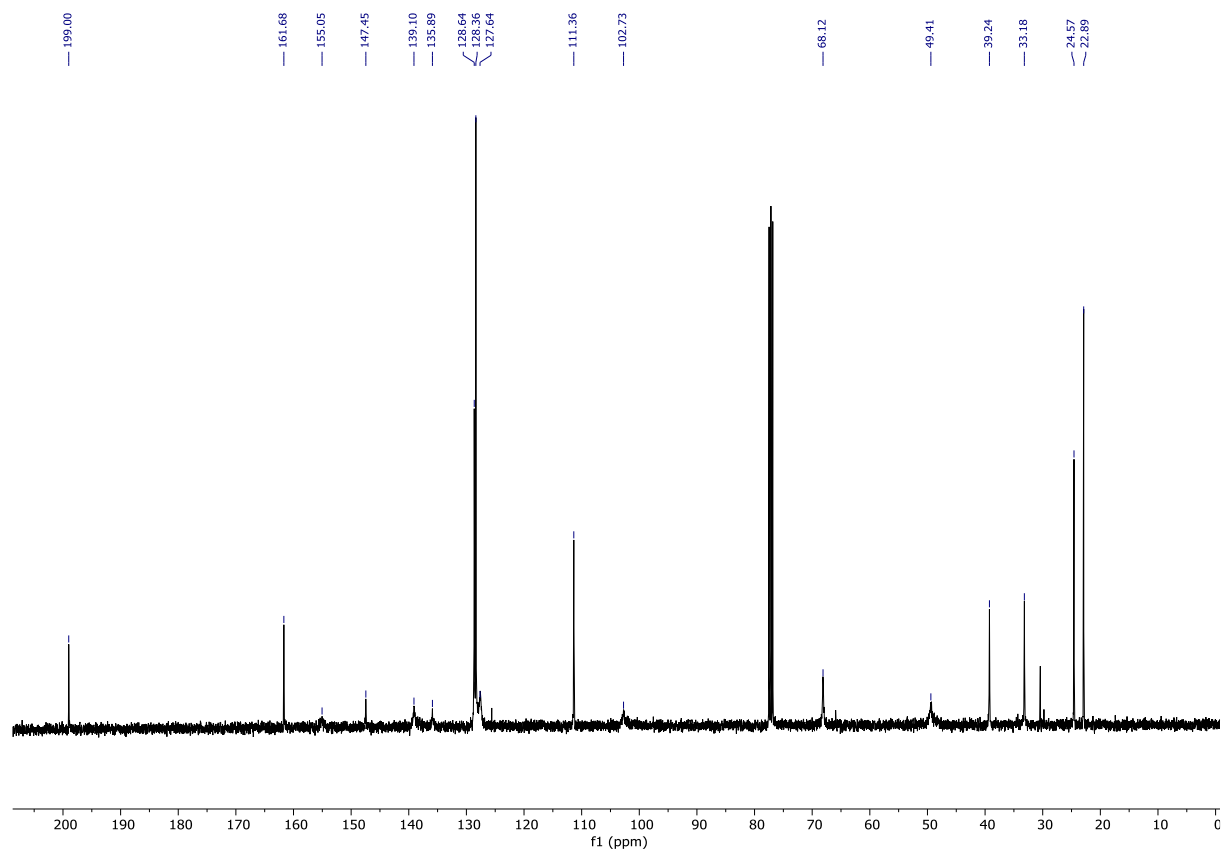

# <sup>1</sup>H NMR (500 MHz, CDCl<sub>3</sub>) of 2p

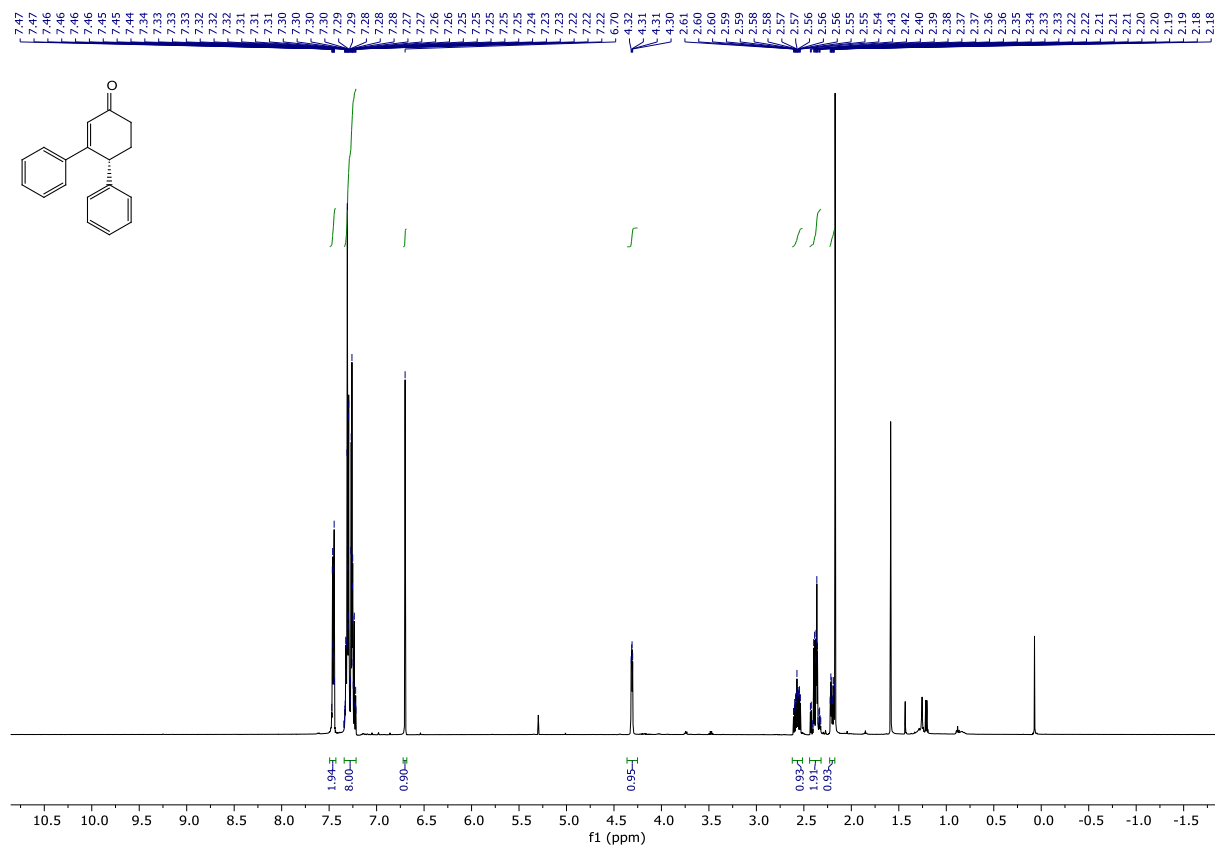

# <sup>13</sup>C NMR (126 MHz, CDCl<sub>3</sub>) of 2p

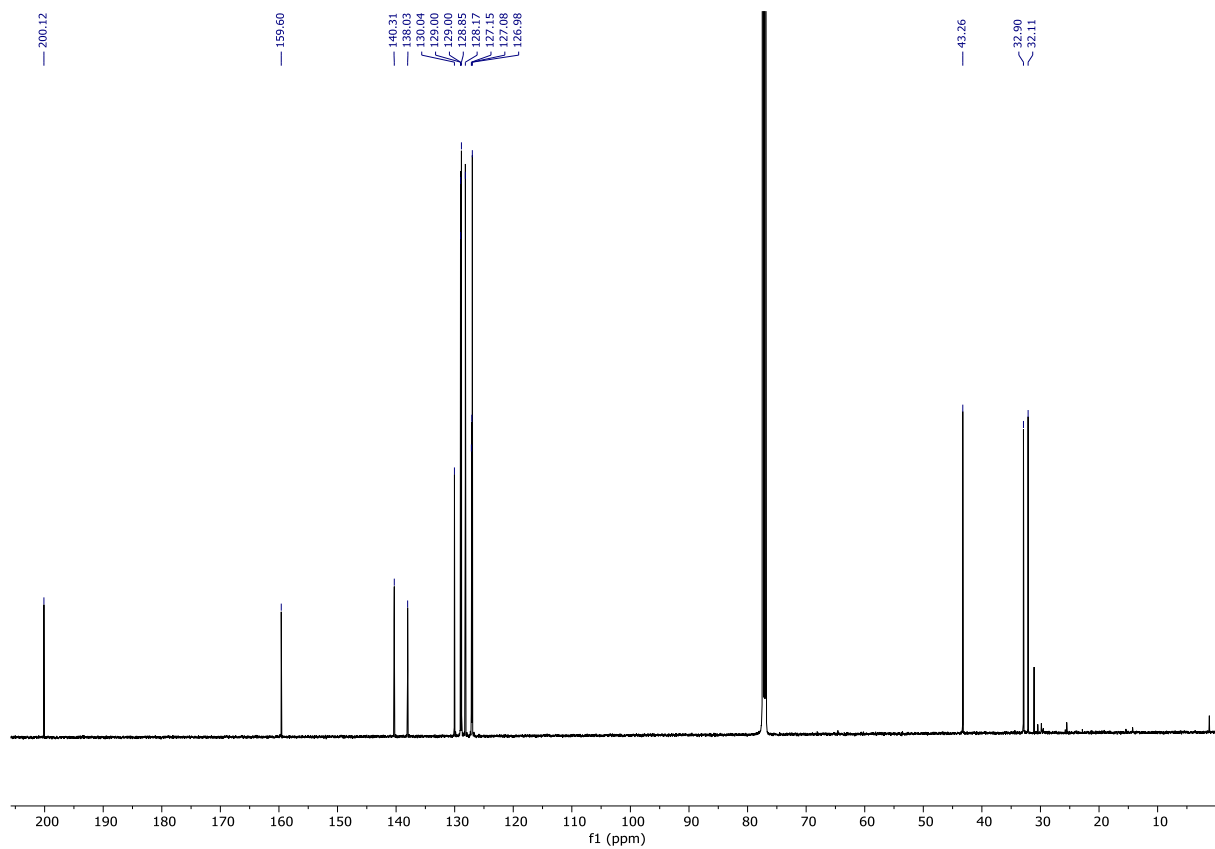

# <sup>1</sup>H NMR (400 MHz, CDCl<sub>3</sub>) of 2q

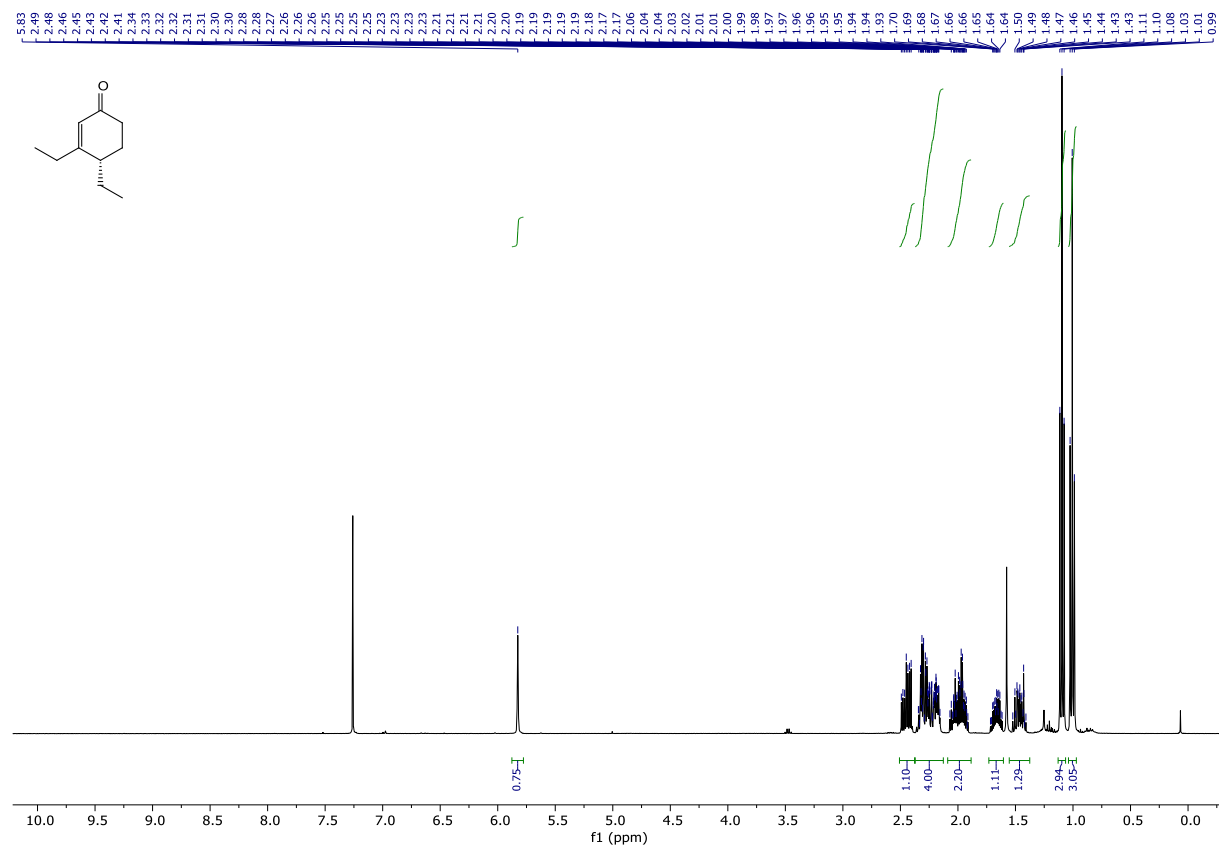

# <sup>13</sup>C NMR (126 MHz, CDCl<sub>3</sub>) of 2q

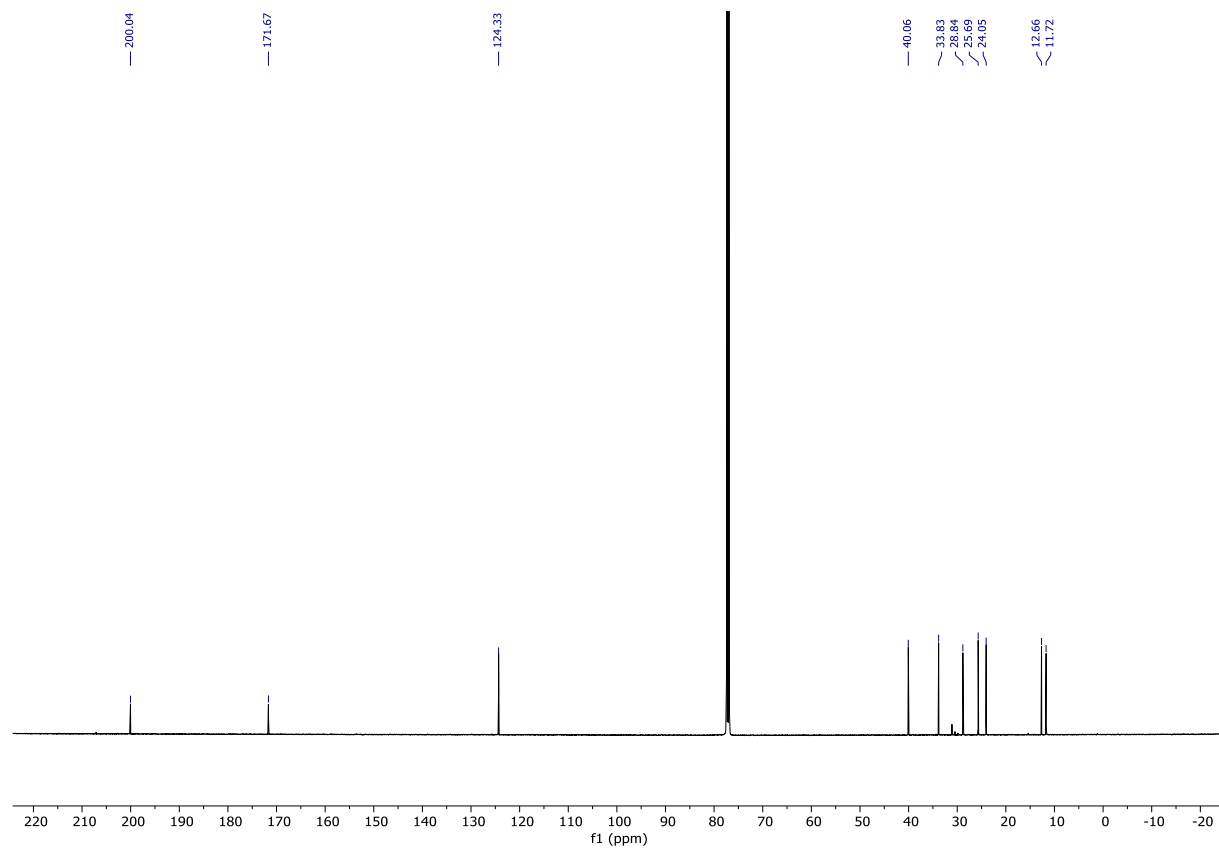

# <sup>1</sup>H NMR (500 MHz, CDCl<sub>3</sub>) of 2r

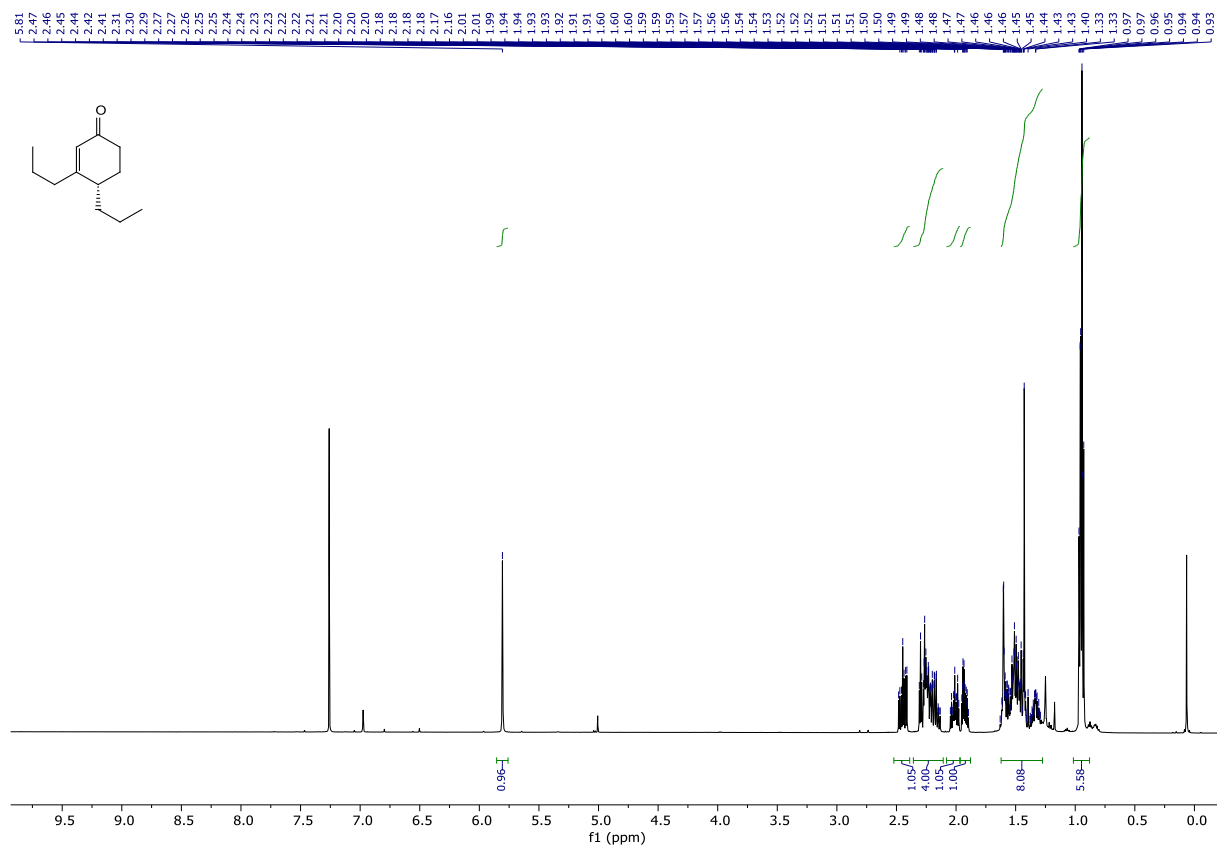

# <sup>13</sup>C NMR (126 MHz, CDCl<sub>3</sub>) of 2r

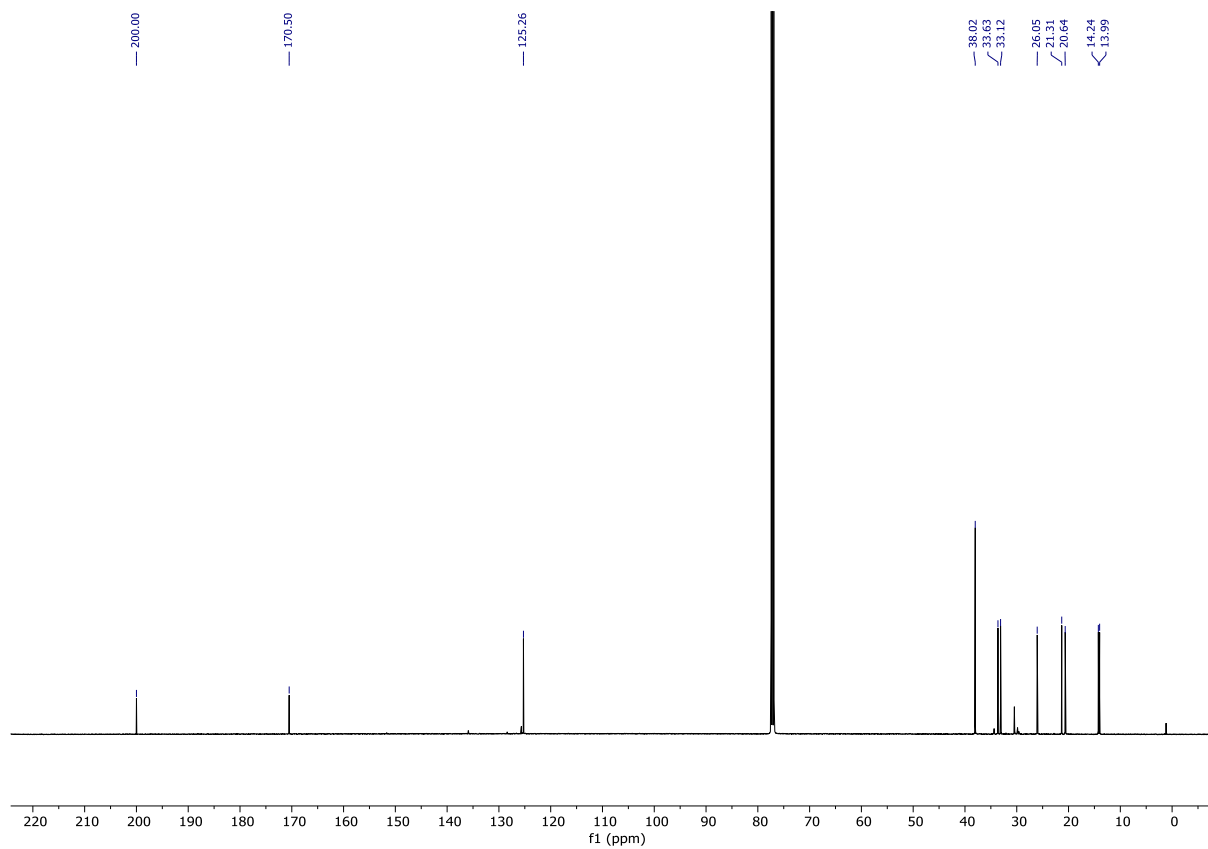

# <sup>1</sup>H NMR (500 MHz, CDCl<sub>3</sub>) of 2s

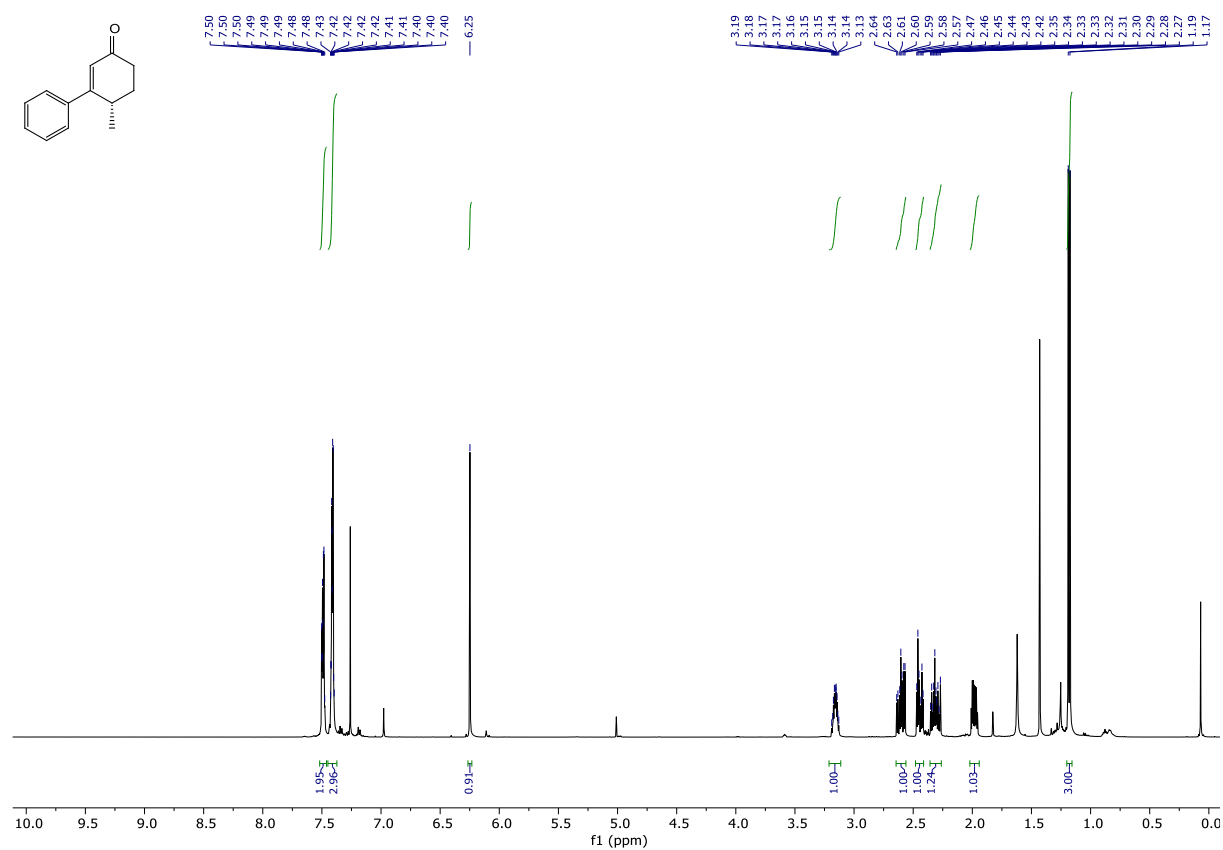

# <sup>13</sup>C NMR (126 MHz, CDCl<sub>3</sub>) of 2s

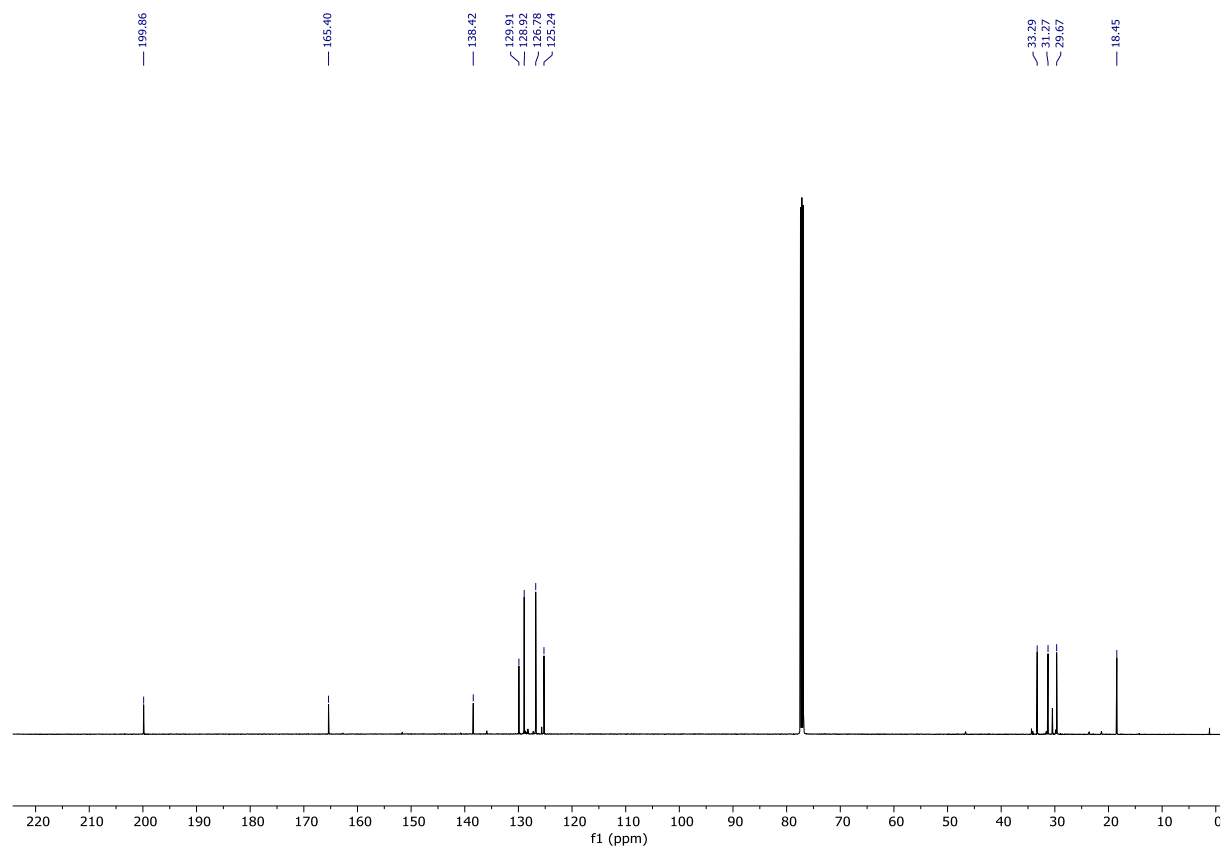

# <sup>1</sup>H NMR (500 MHz, CDCl<sub>3</sub>) of 2t

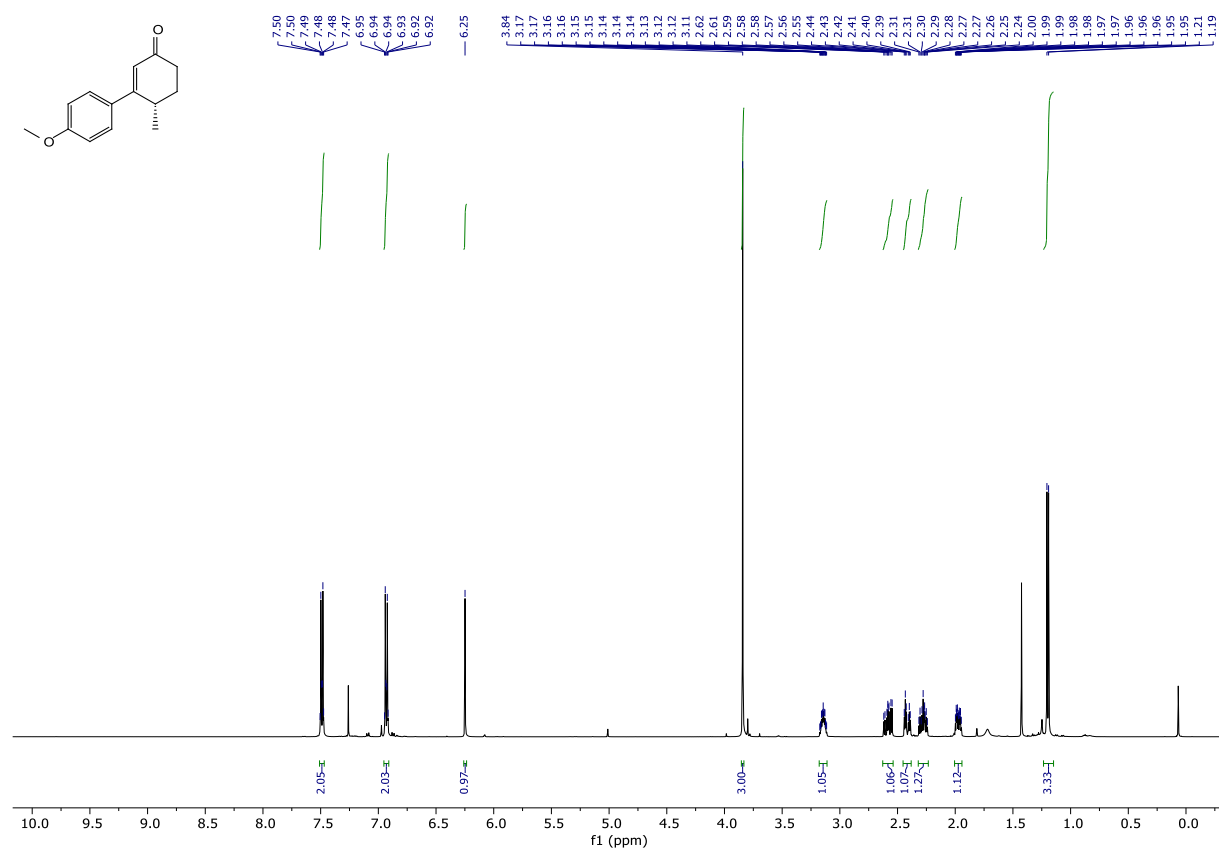

# <sup>13</sup>C NMR (126 MHz, CDCl<sub>3</sub>) of 2t

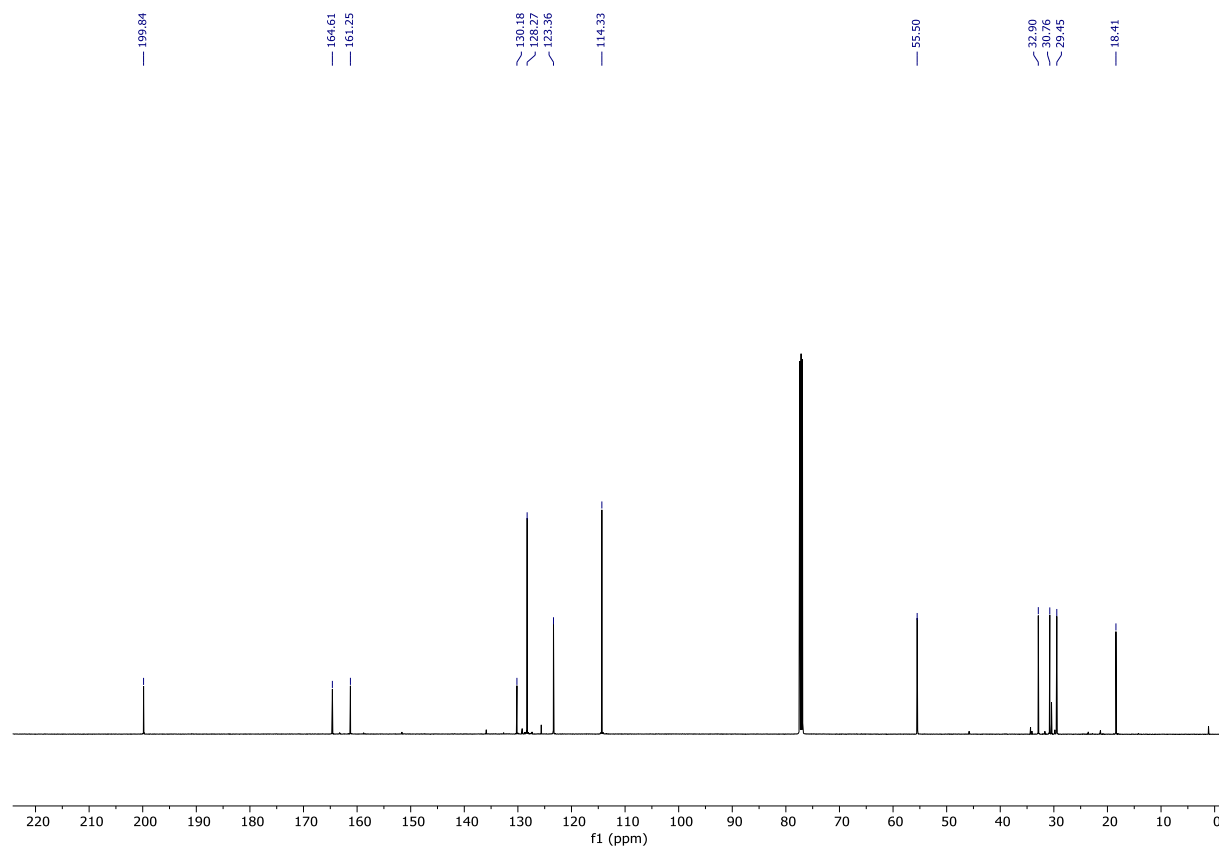



# <sup>1</sup>H NMR (400 MHz, Acetone-*d*<sub>6</sub>) of **4a**

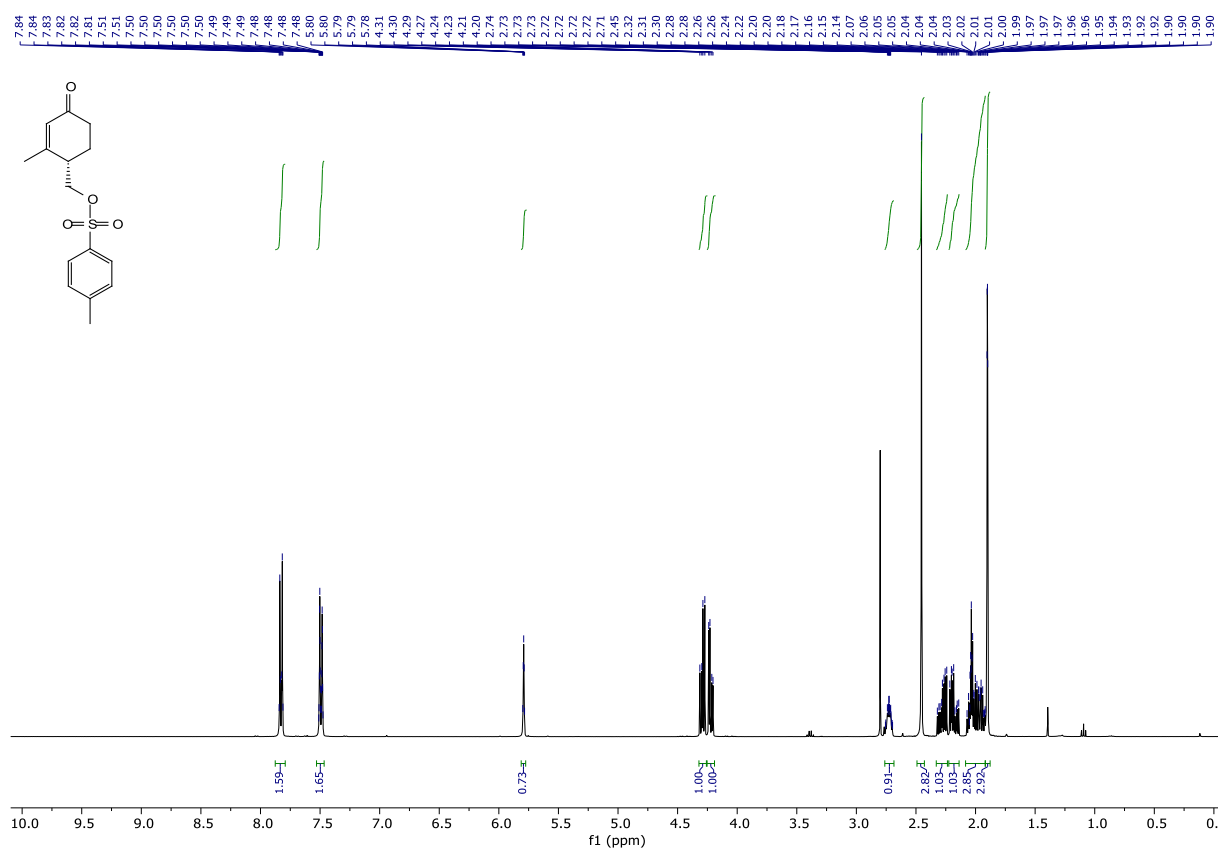

# <sup>13</sup>C NMR (126 MHz, Acetone-*d*<sub>6</sub>) of **4a**

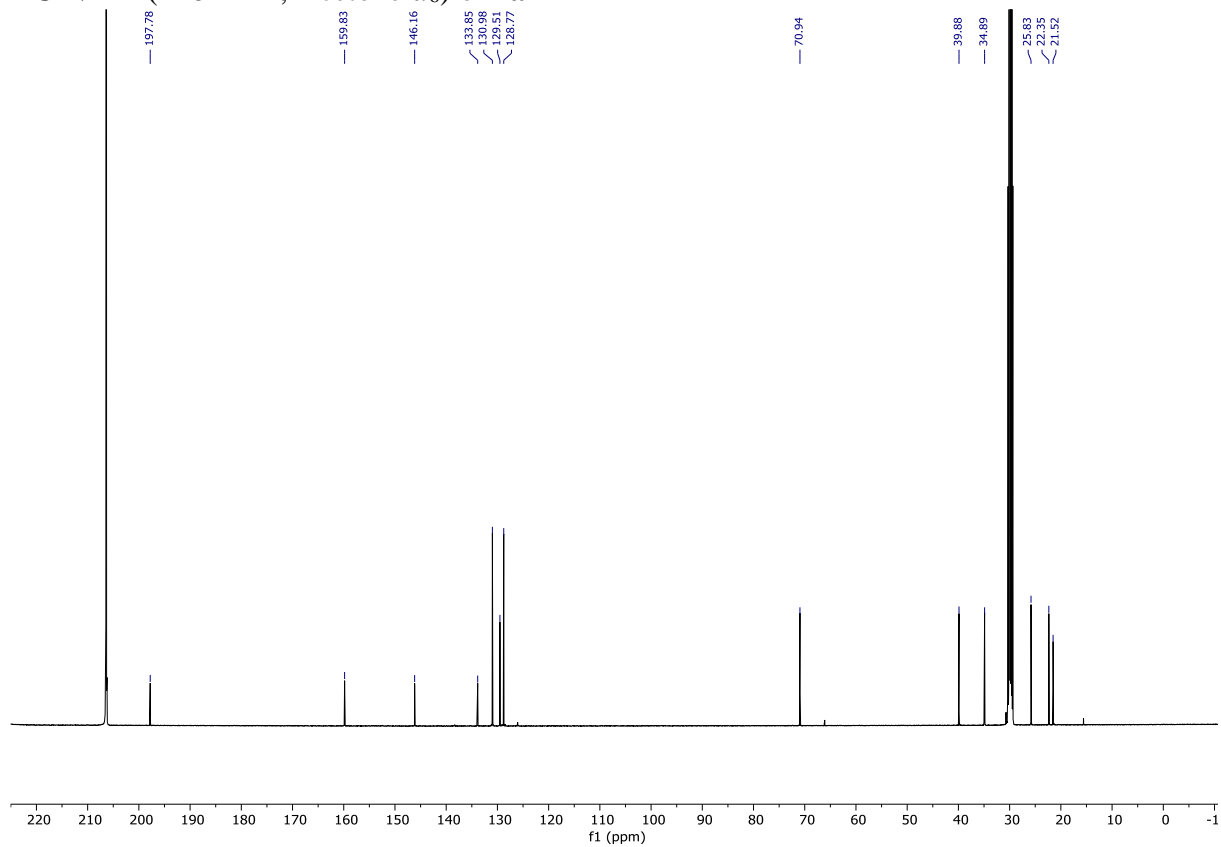

### <sup>1</sup>H NMR (500 MHz, CDCl<sub>3</sub>) of **4b**

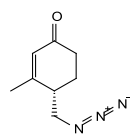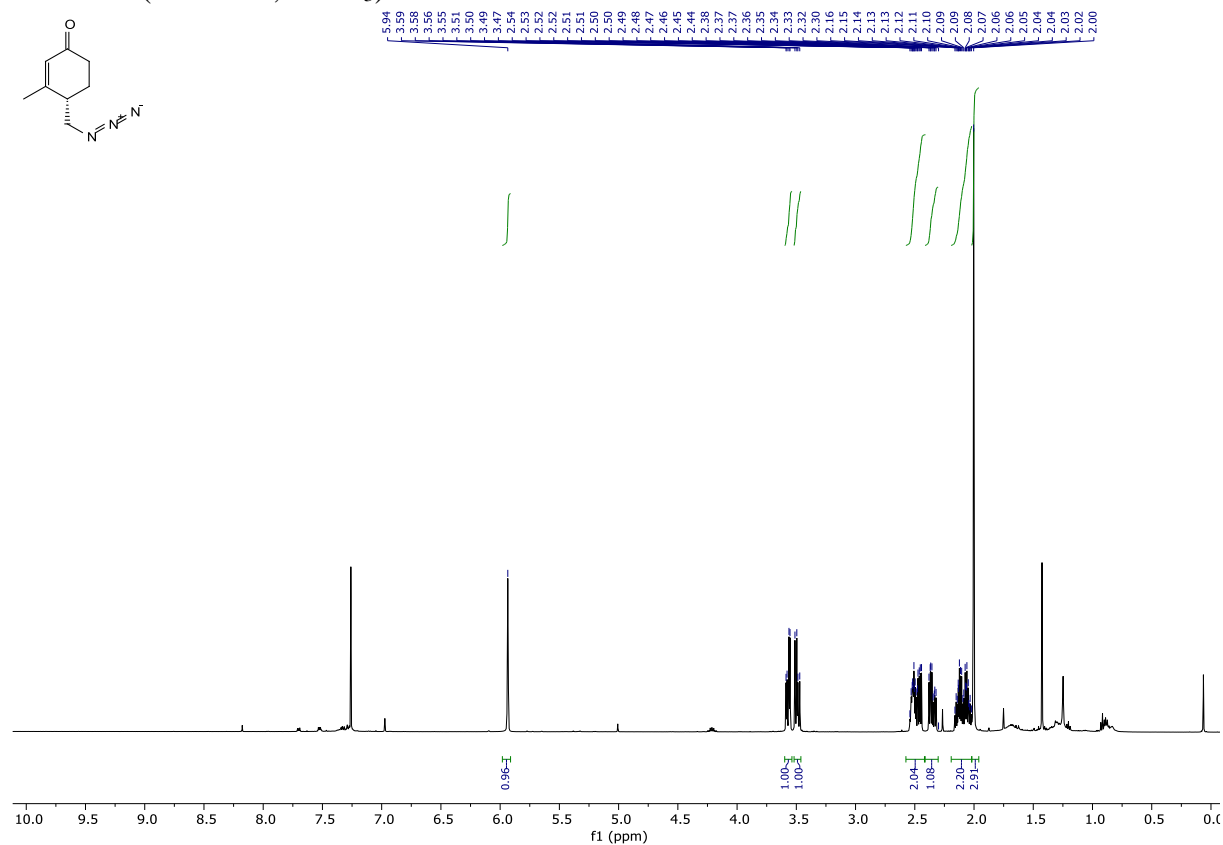

### <sup>13</sup>C NMR (126 MHz, CDCl<sub>3</sub>) of **4b**

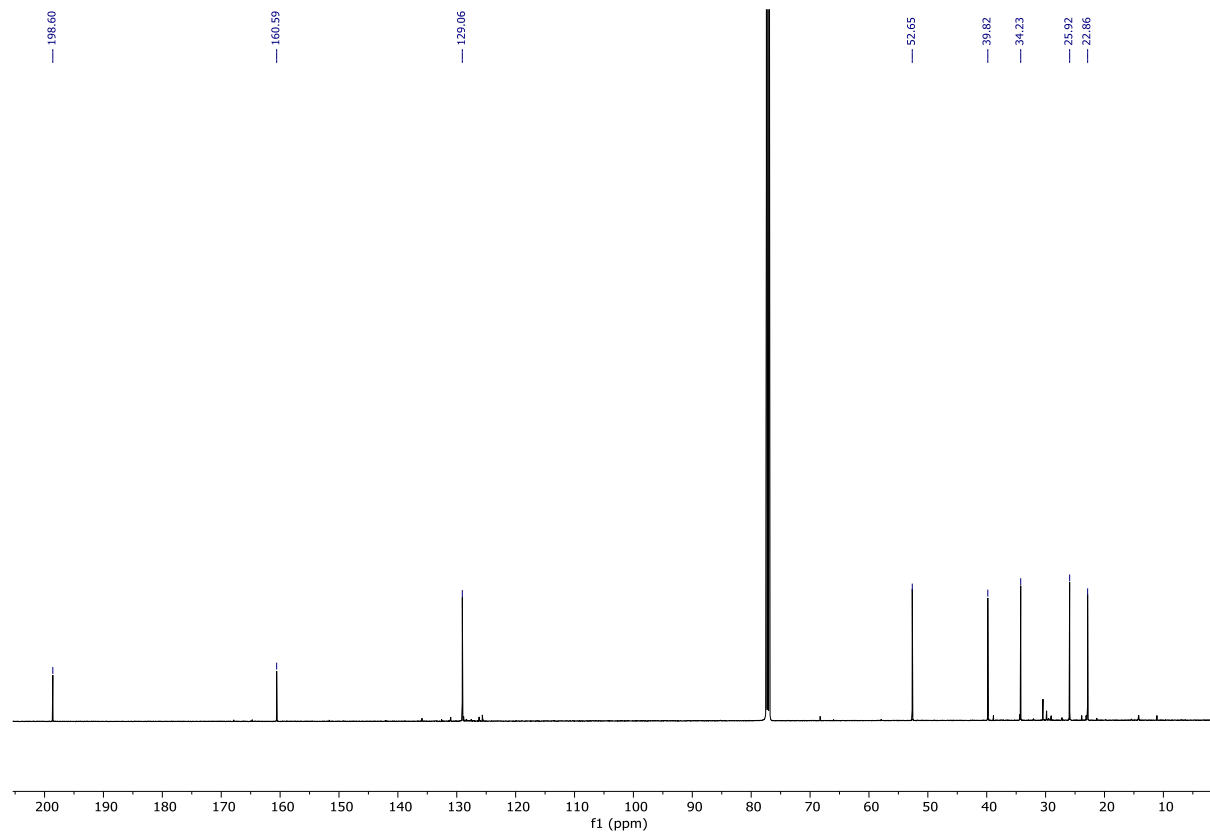

# <sup>1</sup>H NMR (400 MHz, CDCl<sub>3</sub>) of 4c

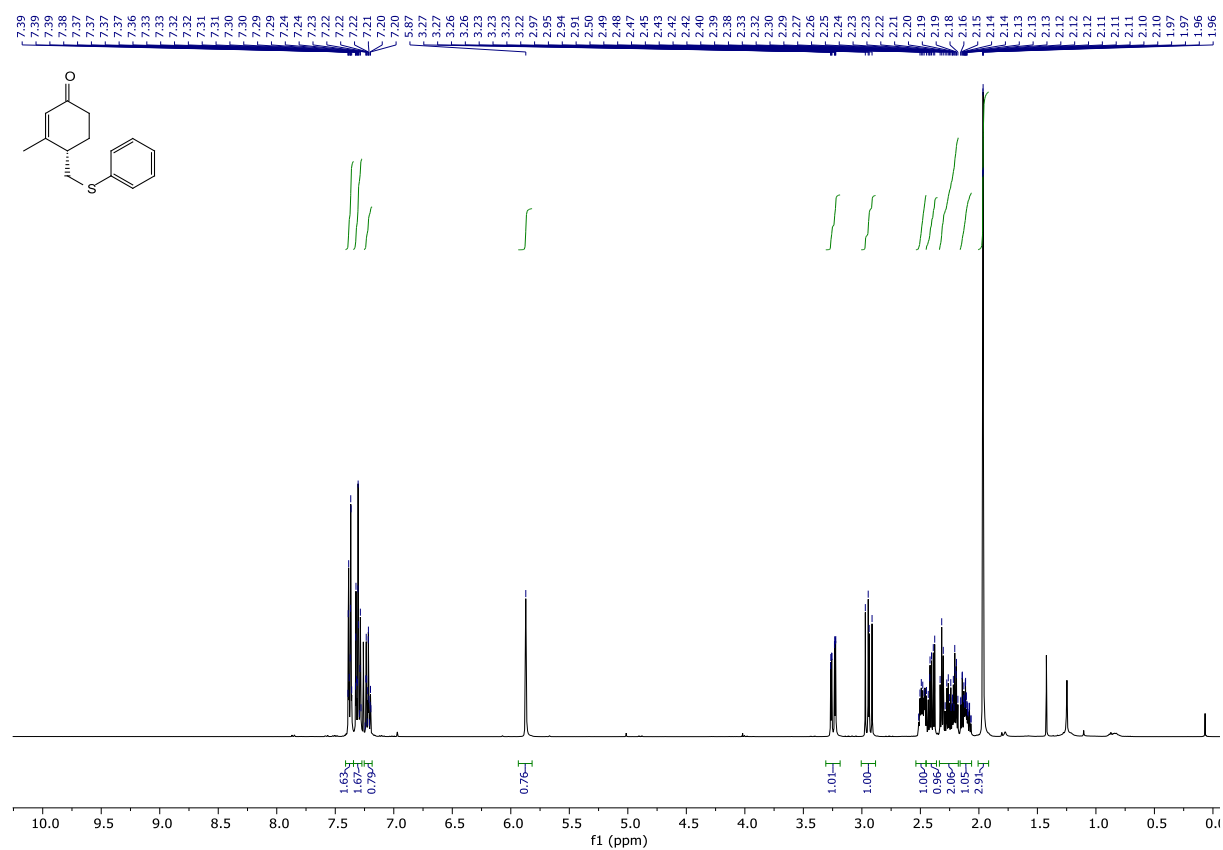

# <sup>13</sup>C NMR (101 MHz, CDCl<sub>3</sub>) of 4c

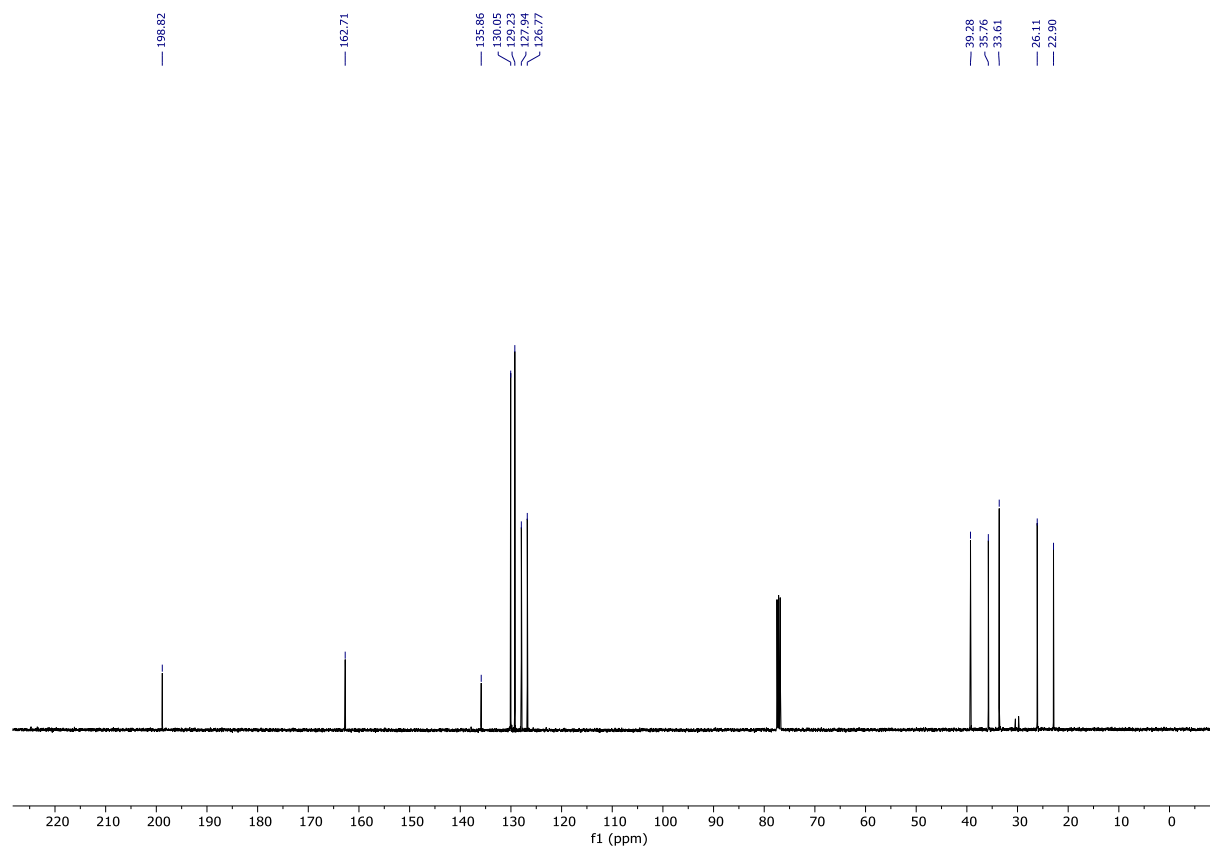

# <sup>1</sup>H NMR (500 MHz, Benzene-*d*<sub>6</sub>) of 4d

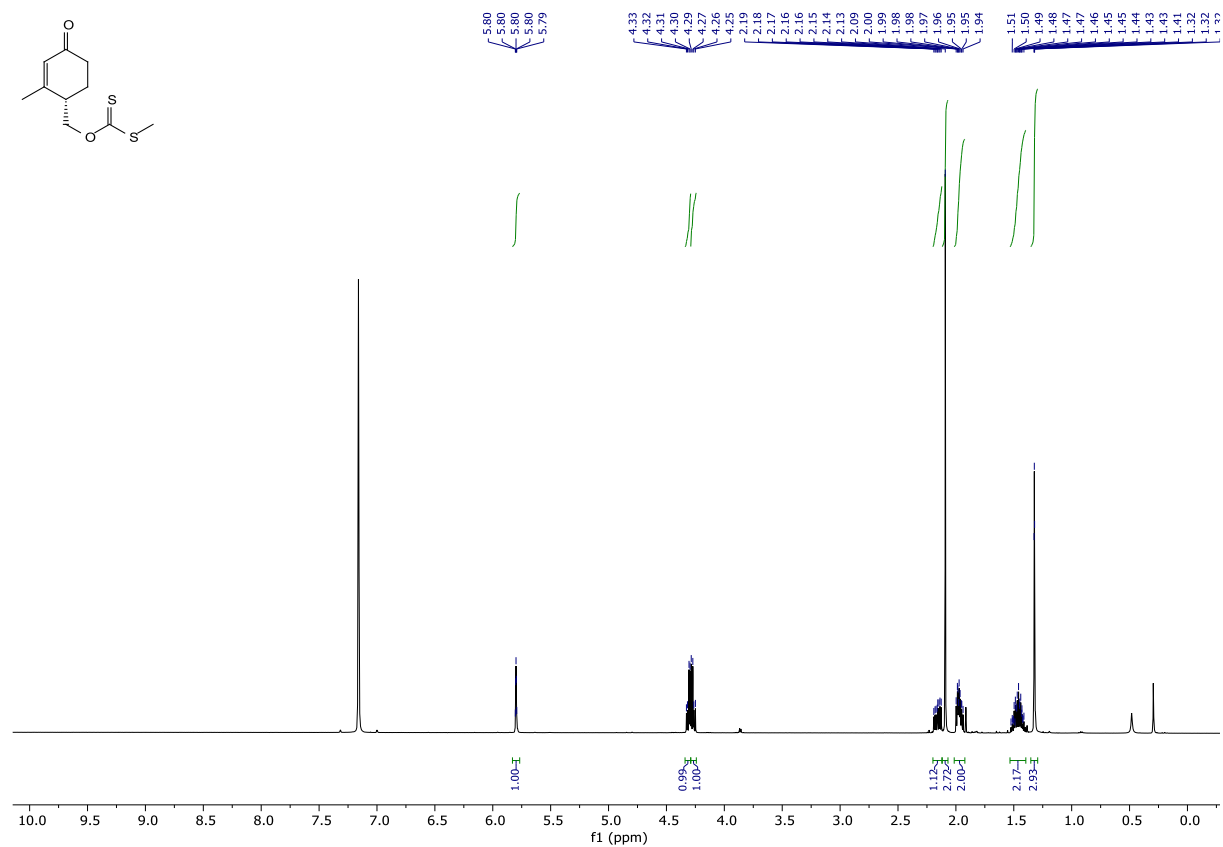

# <sup>13</sup>C NMR (126 MHz, Benzene-*d*<sub>6</sub>) of 4d

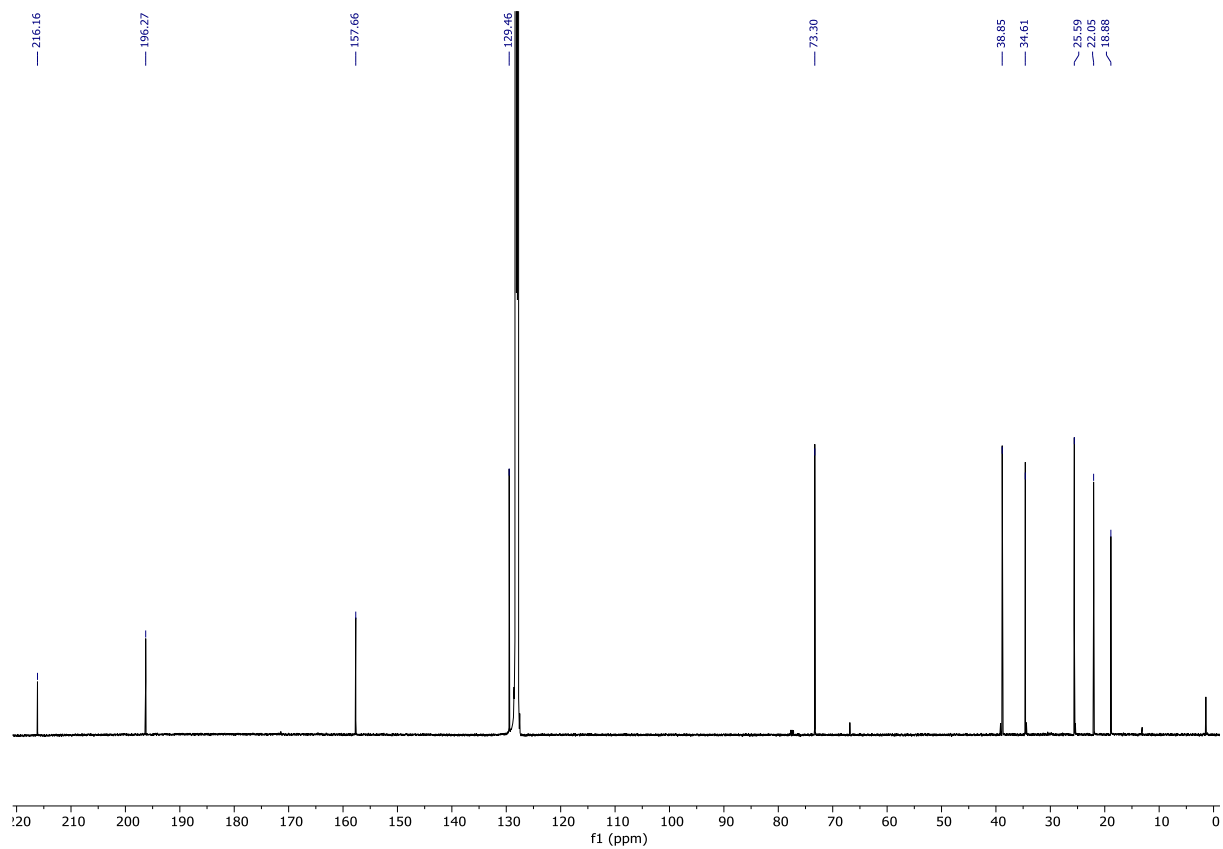



# <sup>1</sup>H NMR (500 MHz, Methanol-*d*<sub>4</sub>) of **4f**

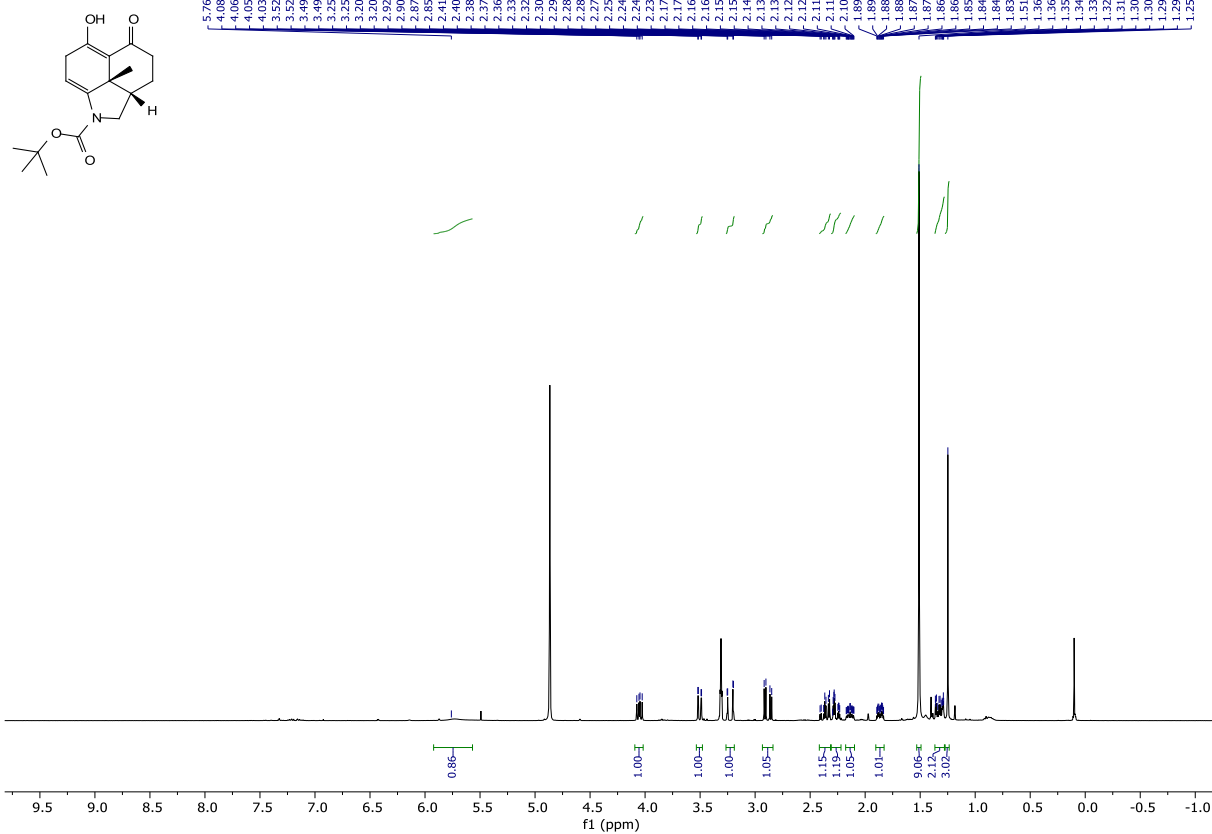

# <sup>13</sup>C NMR (126 MHz, Methanol-*d*<sub>4</sub>) of **4f**

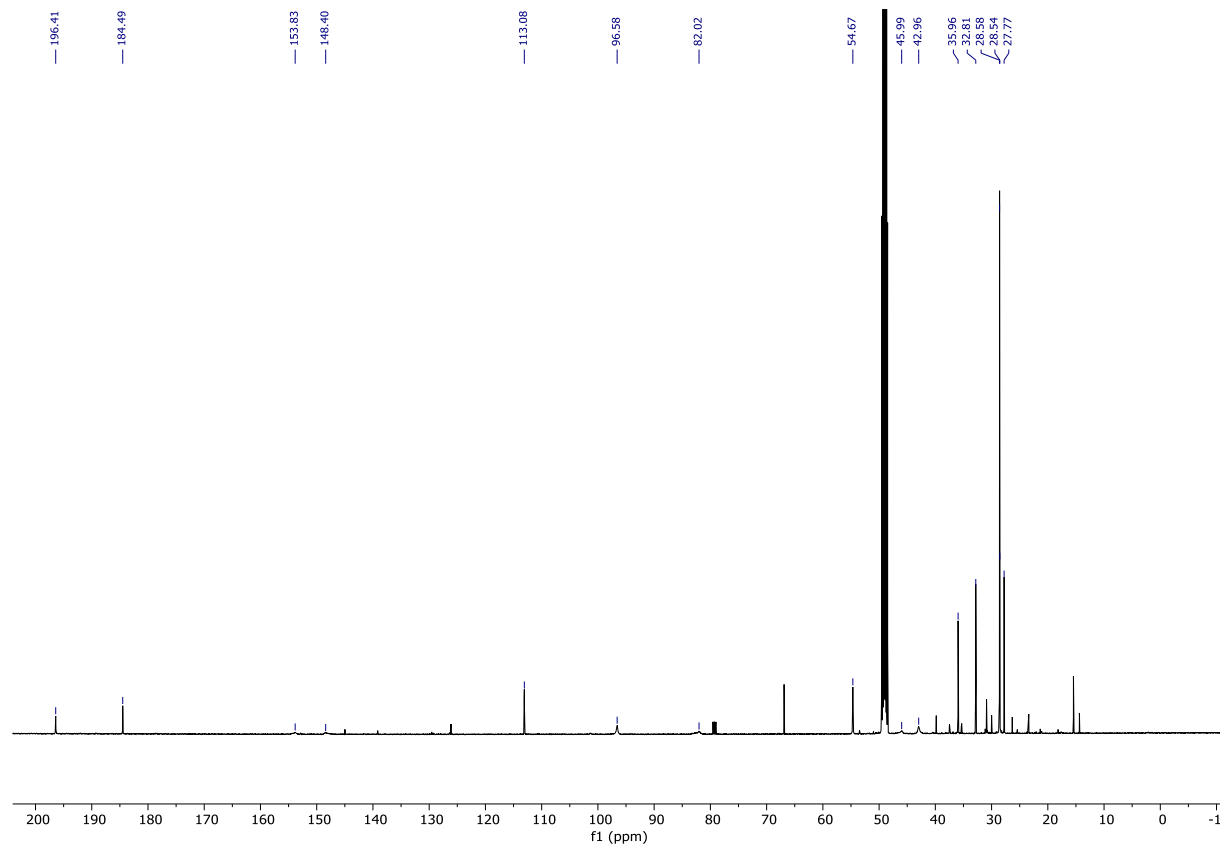

# <sup>1</sup>H NMR (400 MHz, CDCl<sub>3</sub>) of S17

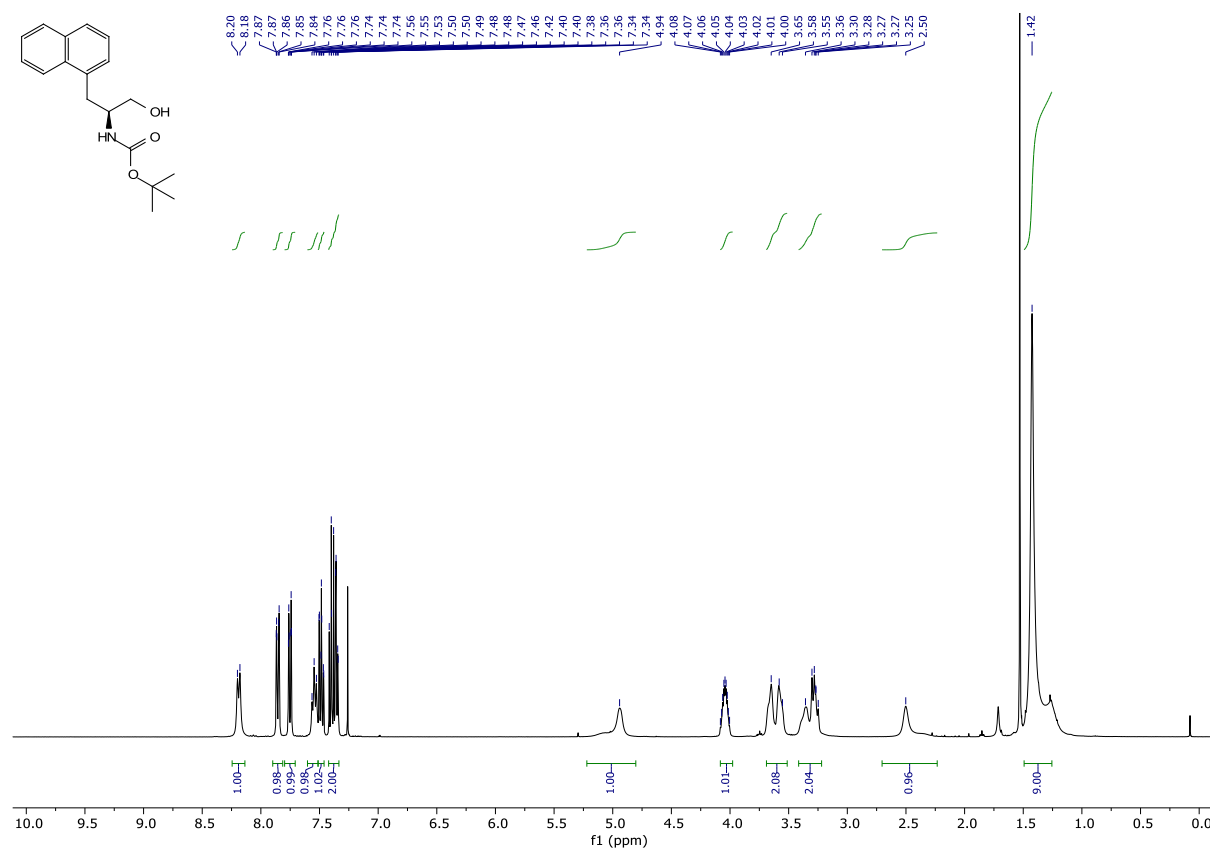

# <sup>13</sup>C NMR (101 MHz, CDCl<sub>3</sub>) of S17

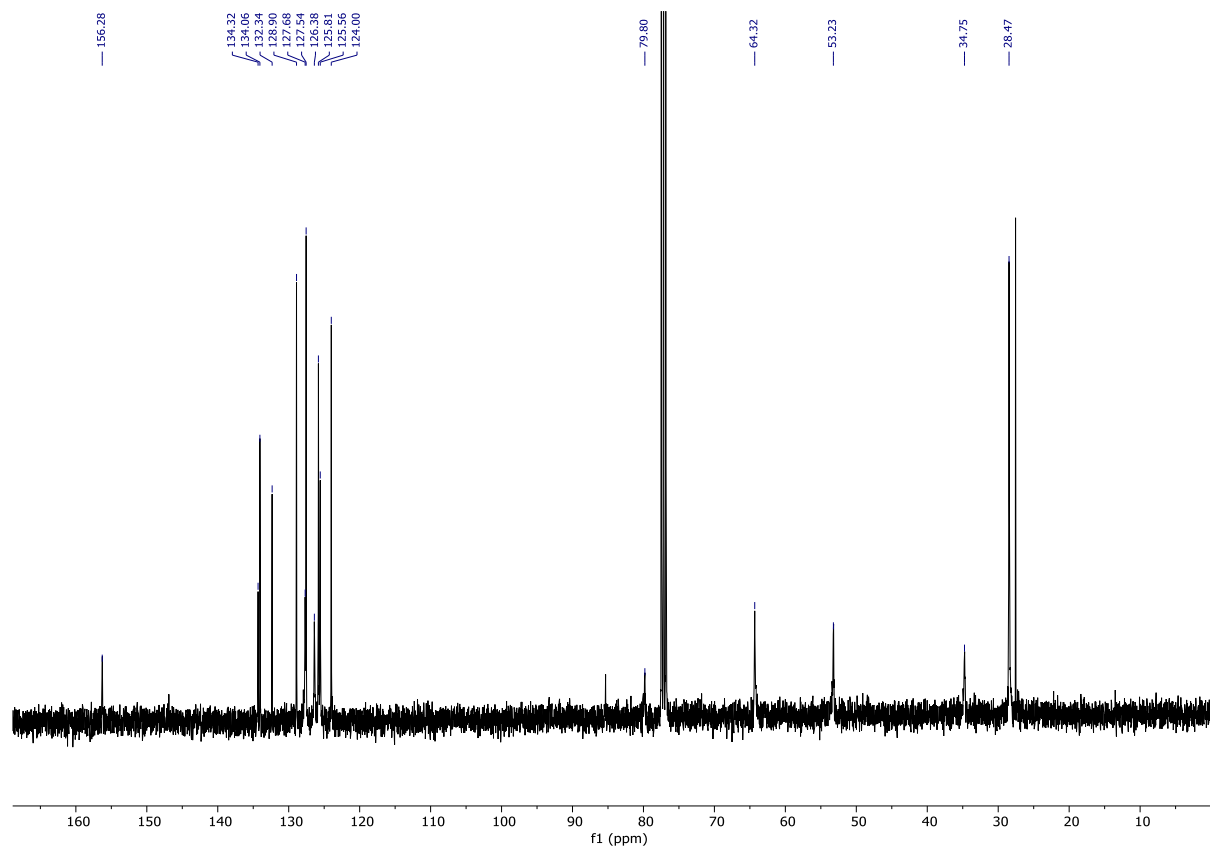

# <sup>1</sup>H NMR (400 MHz, CDCl<sub>3</sub>) of S19

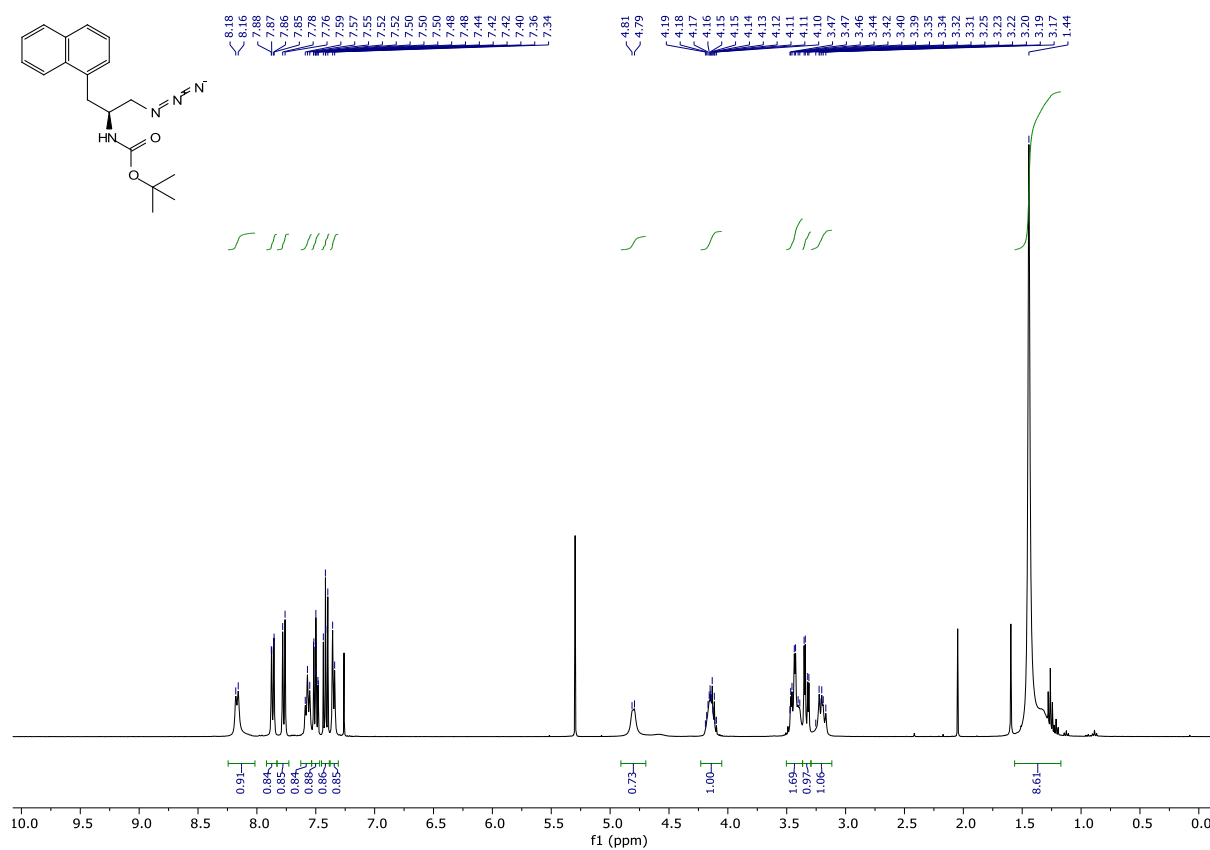

# <sup>13</sup>C NMR (101 MHz, CDCl<sub>3</sub>) of S19

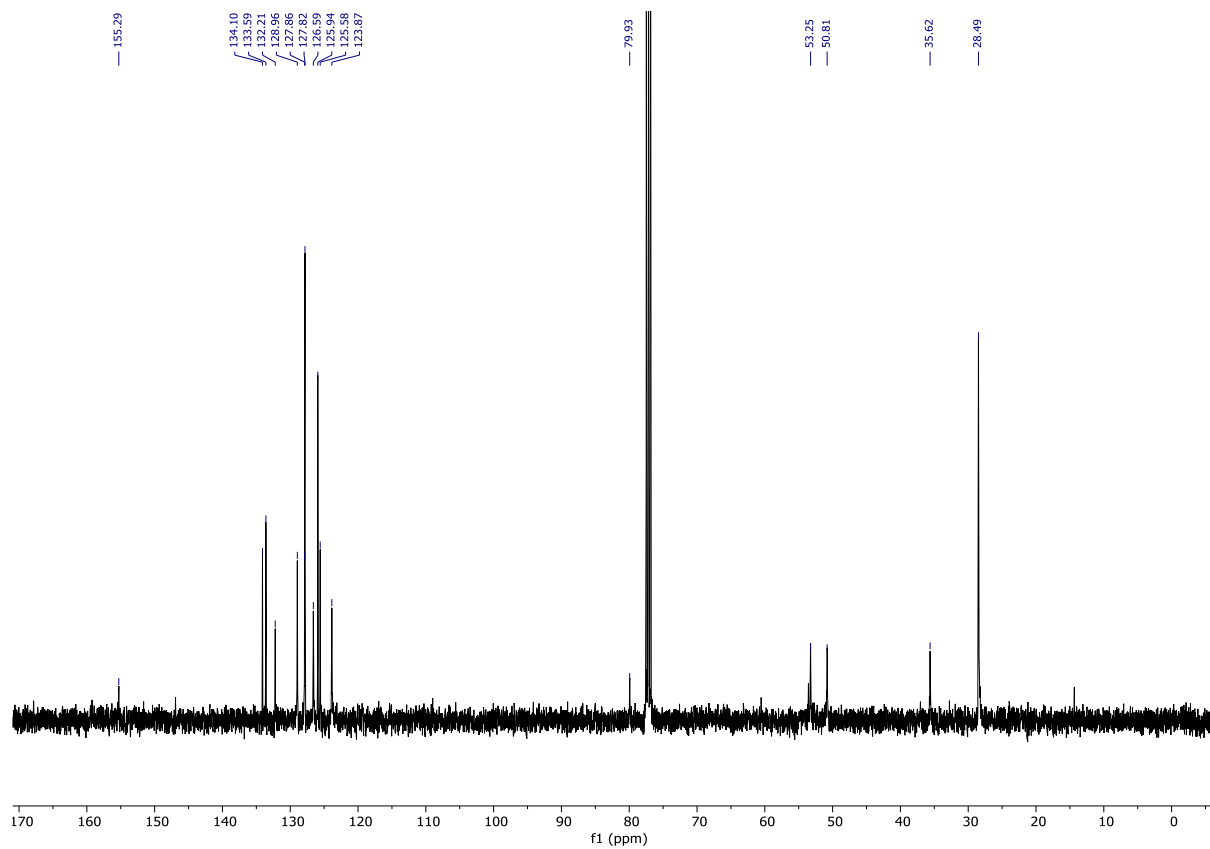





# <sup>1</sup>H NMR (400 MHz, CDCl<sub>3</sub>) of S21

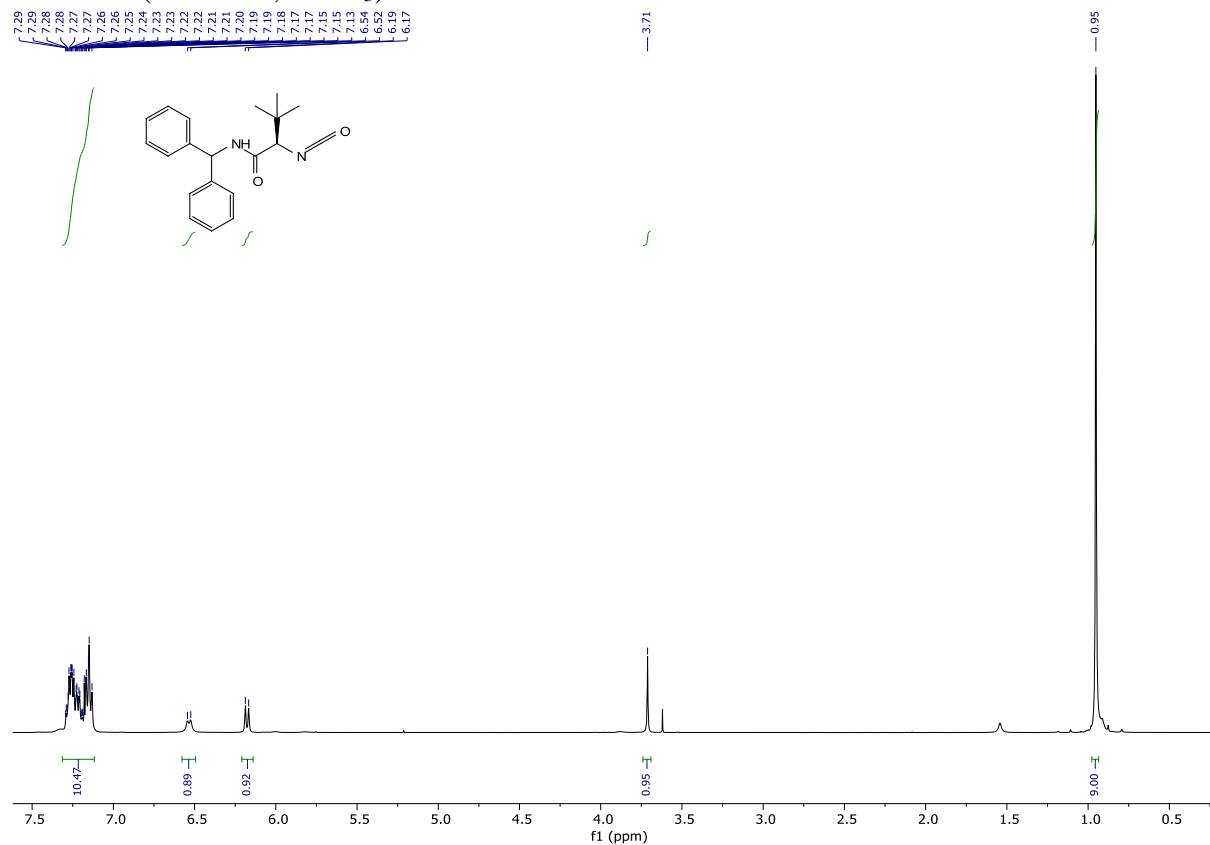

# <sup>13</sup>C NMR (101 MHz, CDCl<sub>3</sub>) of S21

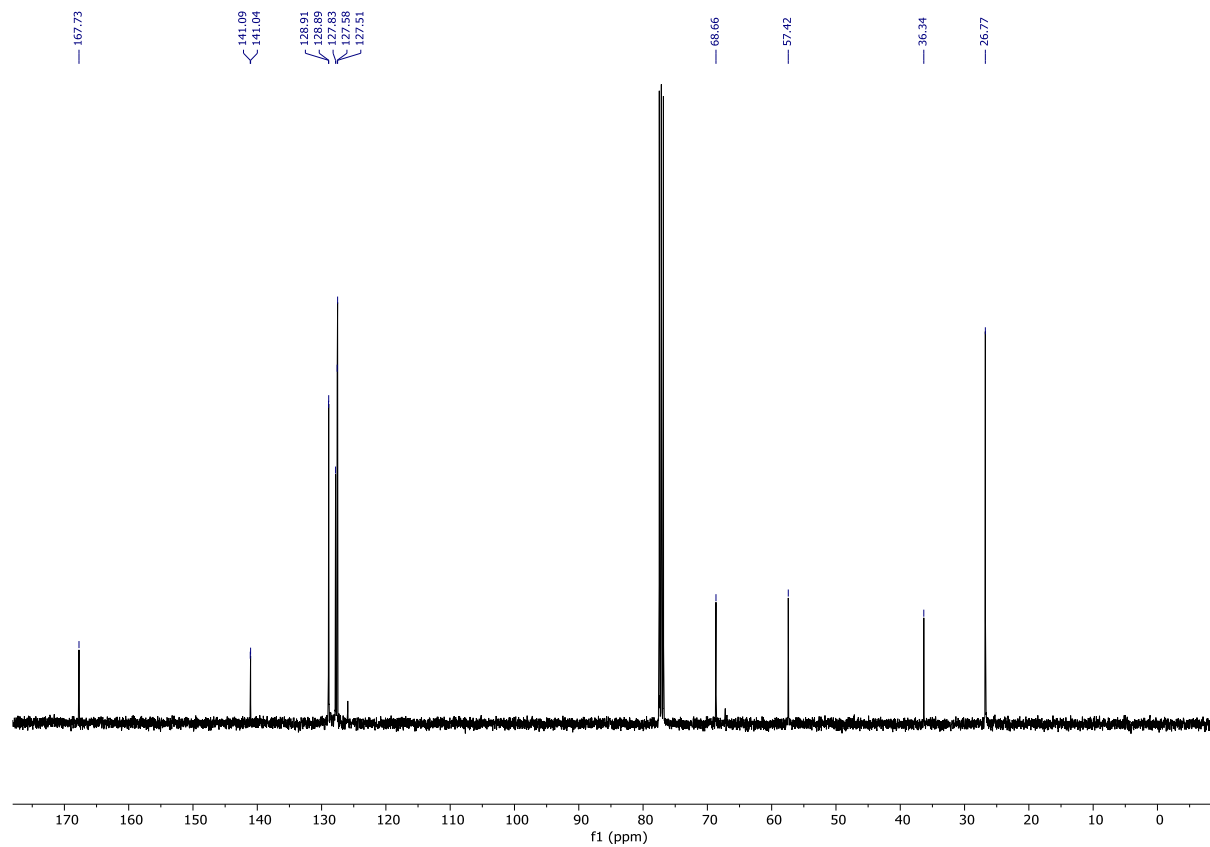



## **2.3 Copies of HPLC traces**

## (S)-4-((benzyloxy)methyl)-3-methylcyclohex-2-en-1-one (2a)

(Chiralpak AS-H, hexane/isopropanol = 70/30, 1 mL/min)

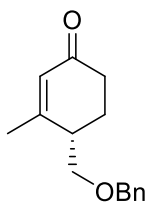

Racemic

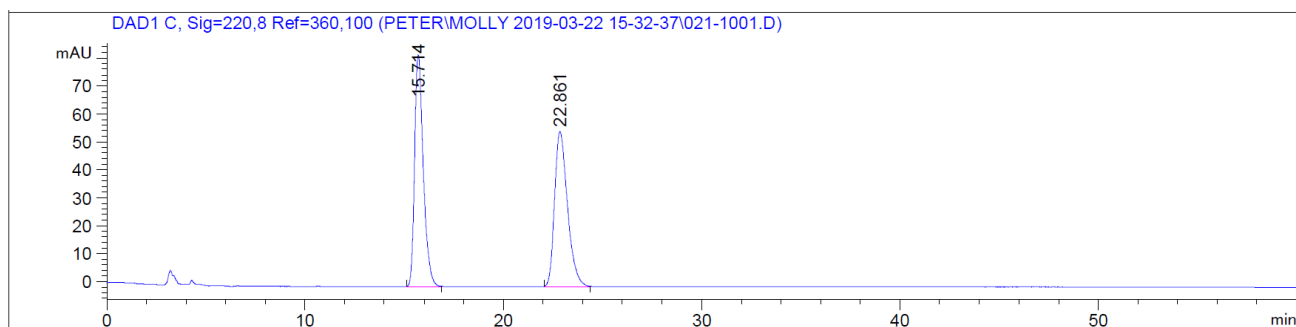

Signal 3: DAD1 C, Sig=220,8 Ref=360,100

| Peak # | RetTime [min] | Type | Width [min] | Area [mAU*s] | Height [mAU] | Area %  |
|--------|---------------|------|-------------|--------------|--------------|---------|
| 1      | 15.714        | BB   | 0.4627      | 2522.97363   | 82.99234     | 50.0491 |
| 2      | 22.861        | BB   | 0.6948      | 2518.02441   | 55.55838     | 49.9509 |

Totals : 5040.99805 138.55072

Enantiomerically enriched (99% ee)

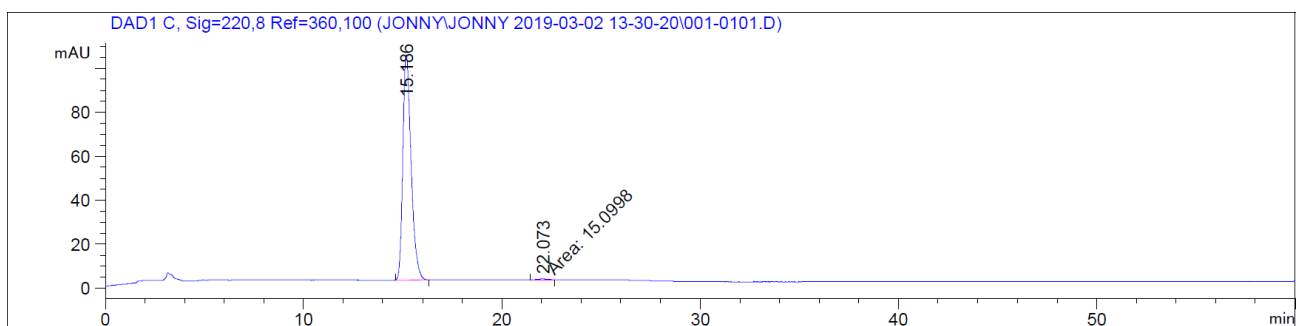

Signal 3: DAD1 C, Sig=220,8 Ref=360,100

| Peak # | RetTime [min] | Type | Width [min] | Area [mAU*s] | Height [mAU] | Area %  |
|--------|---------------|------|-------------|--------------|--------------|---------|
| 1      | 15.186        | BB   | 0.4445      | 2975.49756   | 102.54519    | 99.4951 |
| 2      | 22.073        | MM   | 0.6248      | 15.09975     | 4.02775e-1   | 0.5049  |

Totals : 2990.59731 102.94796

## (S)-4-(methoxymethyl)-3-methylcyclohex-2-en-1-one (2b)

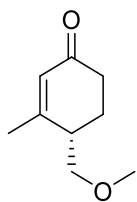

(Chiralpak AD-H, hexane/isopropanol = 95/5, 1 mL/min)

Racemic

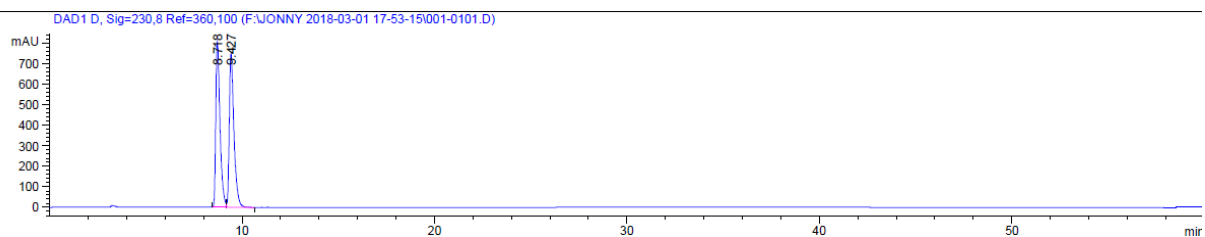

Signal 4: DAD1 D, Sig=230,8 Ref=360,100

| Peak # | RetTime [min] | Type | Width [min] | Area [mAU*s] | Height [mAU] | Area %  |
|--------|---------------|------|-------------|--------------|--------------|---------|
| 1      | 8.718         | BV   | 0.2308      | 1.23747e4    | 807.54541    | 49.6030 |
| 2      | 9.427         | VB   | 0.2537      | 1.25727e4    | 749.58081    | 50.3970 |

Totals : 2.49474e4 1557.12622

Enantiomerically enriched (96% ee)

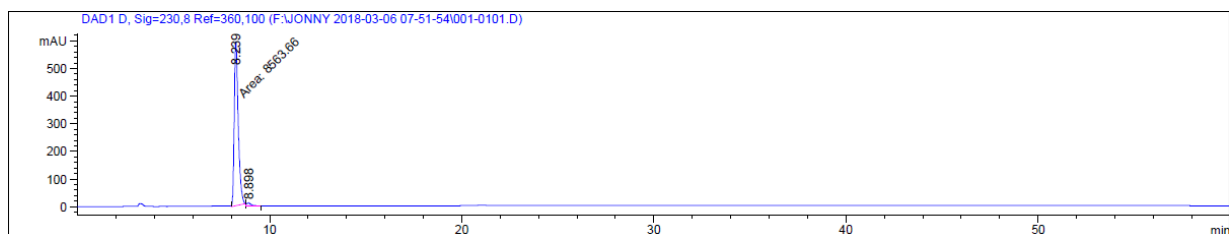

Signal 4: DAD1 D, Sig=230,8 Ref=360,100

| Peak # | RetTime [min] | Type | Width [min] | Area [mAU*s] | Height [mAU] | Area %  |
|--------|---------------|------|-------------|--------------|--------------|---------|
| 1      | 8.239         | MM   | 0.2402      | 8563.65918   | 594.28741    | 97.9566 |
| 2      | 8.898         | VB   | 0.2418      | 178.63654    | 10.64399     | 2.0434  |

Totals : 8742.29572 604.93140

## (S)-4-((allyloxy)methyl)-3-methylcyclohex-2-en-1-one (2c)

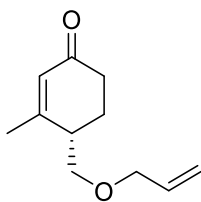

(Chiralpak AS-H, hexane/isopropanol = 70/30, 1 mL/min)

Racemic

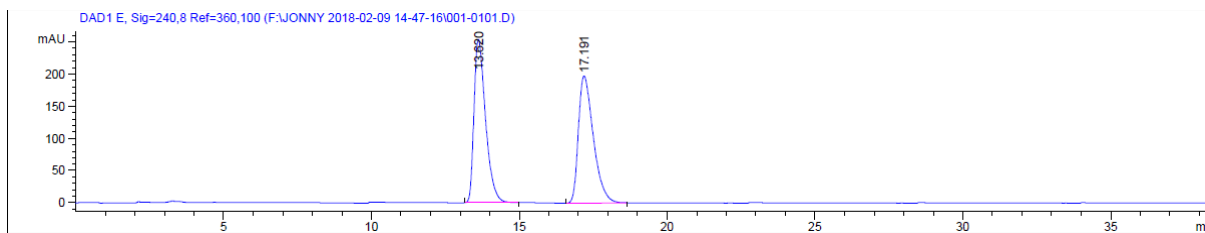

Signal 5: DAD1 E, Sig=240,8 Ref=360,100

| Peak # | RetTime [min] | Type | Width [min] | Area [mAU*s] | Height [mAU] | Area %  |
|--------|---------------|------|-------------|--------------|--------------|---------|
| 1      | 13.620        | BB   | 0.4165      | 6893.32178   | 254.11879    | 49.8071 |
| 2      | 17.191        | BB   | 0.5419      | 6946.73047   | 197.72774    | 50.1929 |

Totals : 1.38401e4 451.84653

Enantiomerically enriched (98% ee)

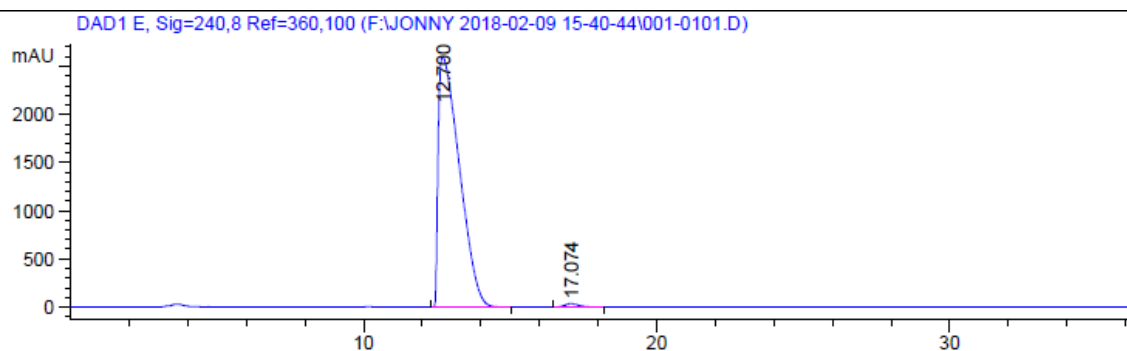

Signal 5: DAD1 E, Sig=240,8 Ref=360,100

| Peak # | RetTime [min] | Type | Width [min] | Area [mAU*s] | Height [mAU] | Area %  |
|--------|---------------|------|-------------|--------------|--------------|---------|
| 1      | 12.700        | BB   | 0.7935      | 1.30495e5    | 2600.03125   | 99.1232 |
| 2      | 17.074        | BB   | 0.5053      | 1154.28345   | 34.94859     | 0.8768  |

Totals : 1.31649e5 2634.97984

**(S)-3-methyl-4-(((3-methylbut-2-en-1-yl)oxy)methyl)cyclohex-2-en-1-one (2d)**

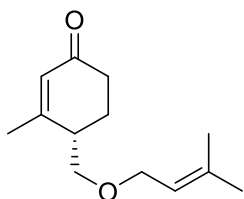

(Chiralpak AS-H, hexane/isopropanol = 95/5, 1 mL/min)

Racemic

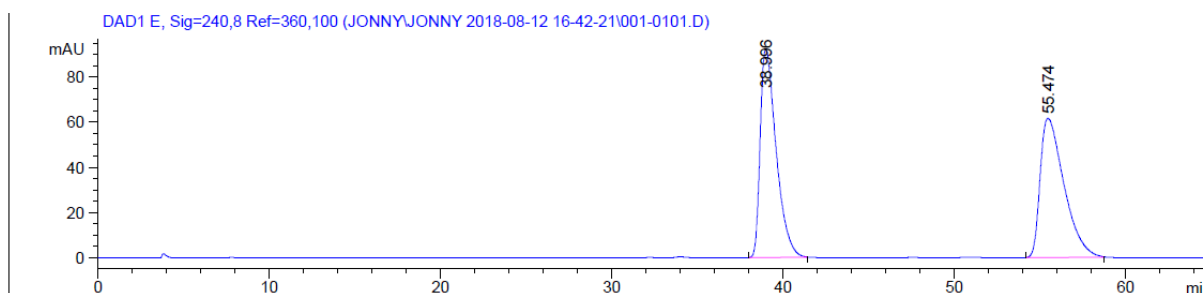

Signal 5: DAD1 E, Sig=240,8 Ref=360,100

| Peak # | RetTime [min] | Type | Width [min] | Area [mAU*s] | Height [mAU] | Area %  |
|--------|---------------|------|-------------|--------------|--------------|---------|
| 1      | 38.996        | BB   | 0.9832      | 5970.24365   | 92.23606     | 50.0104 |
| 2      | 55.474        | BB   | 1.4405      | 5967.75879   | 61.69810     | 49.9896 |

Totals : 1.19380e4 153.93417

Enantiomerically enriched (99% ee)

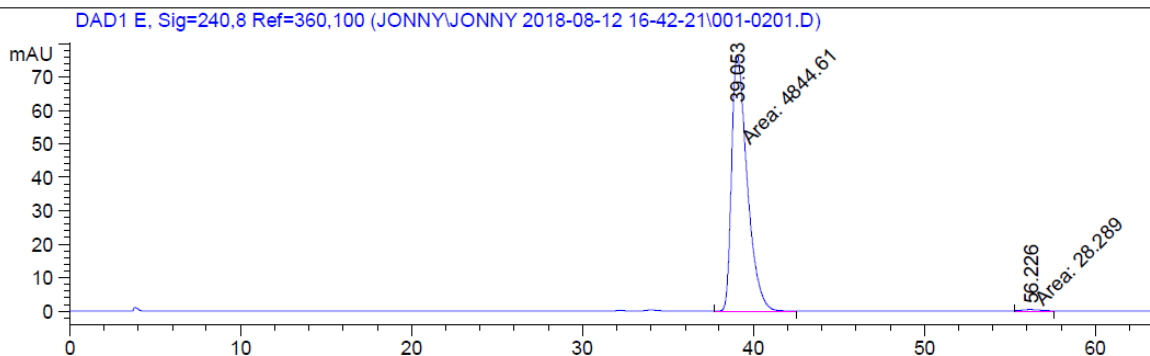

Signal 5: DAD1 E, Sig=240,8 Ref=360,100

| Peak # | RetTime [min] | Type | Width [min] | Area [mAU*s] | Height [mAU] | Area %  |
|--------|---------------|------|-------------|--------------|--------------|---------|
| 1      | 39.053        | MM   | 1.0545      | 4844.60693   | 76.56857     | 99.4195 |
| 2      | 56.226        | MM   | 1.1533      | 28.28904     | 4.08822e-1   | 0.5805  |

Totals : 4872.89597 76.97739



## (S)-3-methyl-4-((prop-2-yn-1-yloxy)methyl)cyclohex-2-en-1-one (2e)

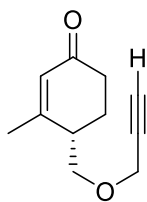

(Chiralpak AS-H, hexane/isopropanol = 70/30, 1 mL/min)

Racemic

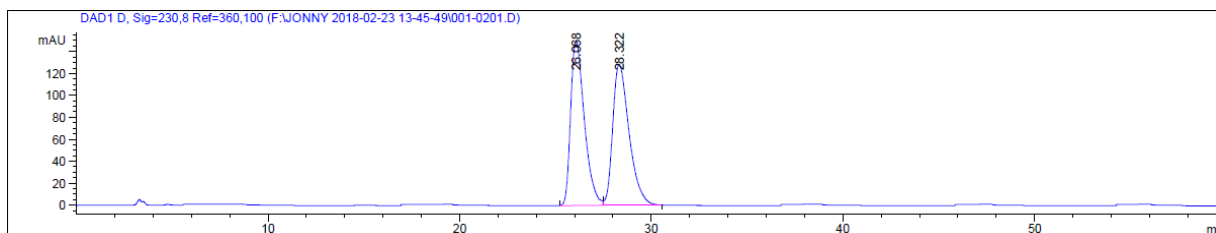

Signal 4: DAD1 D, Sig=230,8 Ref=360,100

| Peak # | RetTime [min] | Type | Width [min] | Area [mAU*s] | Height [mAU] | Area %  |
|--------|---------------|------|-------------|--------------|--------------|---------|
| 1      | 26.068        | BV   | 0.7612      | 7468.18262   | 150.44040    | 49.4210 |
| 2      | 28.322        | VB   | 0.9115      | 7643.17139   | 128.58408    | 50.5790 |

Totals : 1.51114e4 279.02448

Enantiomerically enriched (99% ee)

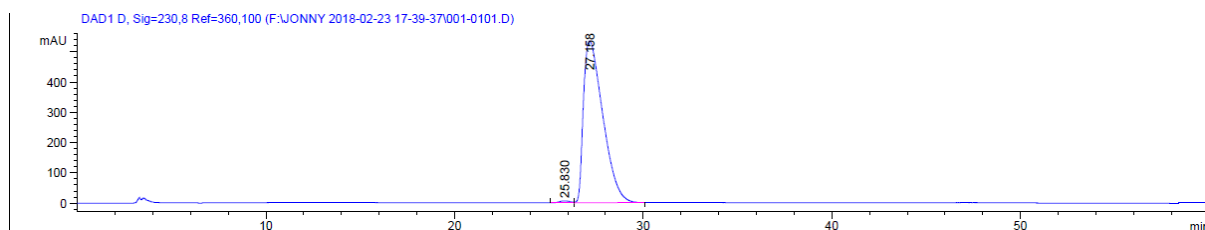

Signal 4: DAD1 D, Sig=230,8 Ref=360,100

| Peak # | RetTime [min] | Type | Width [min] | Area [mAU*s] | Height [mAU] | Area %  |
|--------|---------------|------|-------------|--------------|--------------|---------|
| 1      | 25.830        | BV   | 0.5954      | 259.36972    | 6.76373      | 0.6765  |
| 2      | 27.158        | VB   | 1.1066      | 3.80824e4    | 533.64917    | 99.3235 |

Totals : 3.83418e4 540.41290

**(S)-4-(((tert-butyldimethylsilyl)oxy)methyl)-3-methylcyclohex-2-en-1-one (2f)**

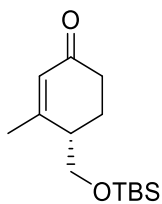

(Chiralpak AS-H, hexane/isopropanol = 90/10 to 70/30, 1 mL/min)

Gradient: t=0 min: 90/10 – t=25 min: 70/30 – t=55 min: 70/30 – t=55 min: 90/10 – t=60 min: 90/10

Racemic

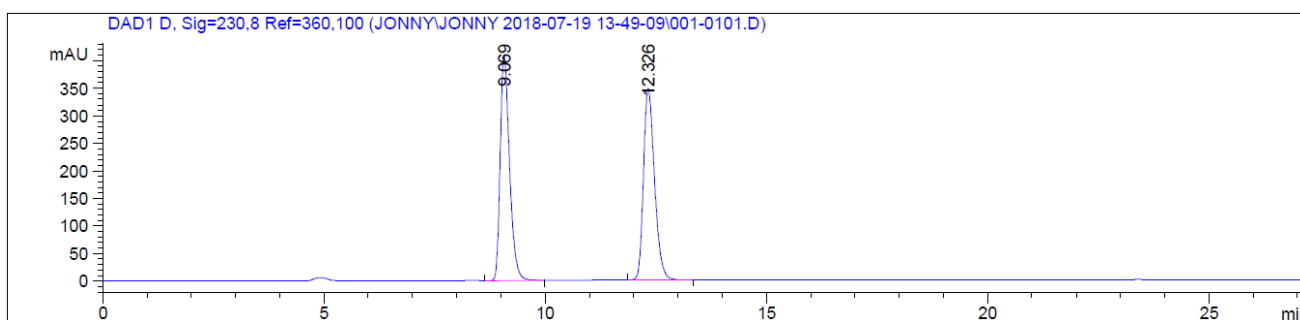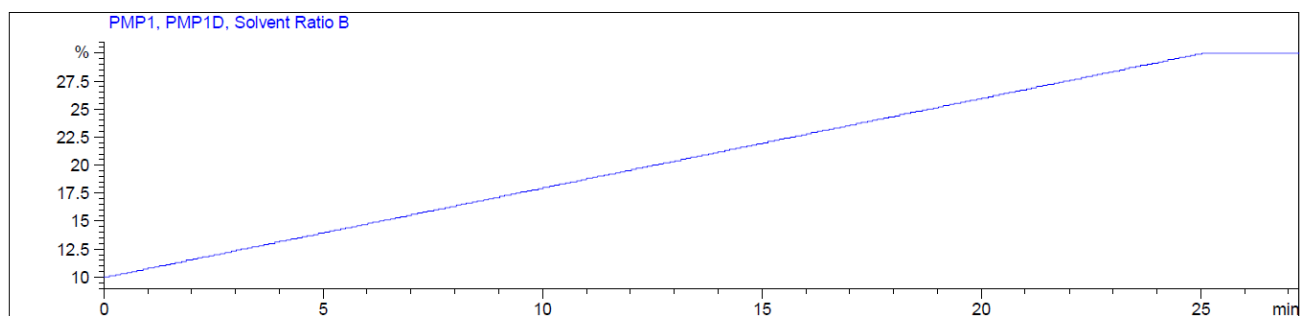

Signal 4: DAD1 D, Sig=230,8 Ref=360,100

| Peak # | RetTime [min] | Type | Width [min] | Area [mAU*s] | Height [mAU] | Area %  |
|--------|---------------|------|-------------|--------------|--------------|---------|
| 1      | 9.069         | VB   | 0.2223      | 5988.45996   | 410.18536    | 49.8863 |
| 2      | 12.326        | BB   | 0.2658      | 6015.76416   | 347.71387    | 50.1137 |

Totals : 1.20042e4 757.89923

Enantiomerically enriched (99% ee)

DAD1 D, Sig=230,8 Ref=360,100 (JONNYJONNY 2018-07-25 14-31-47\001-0101.D)

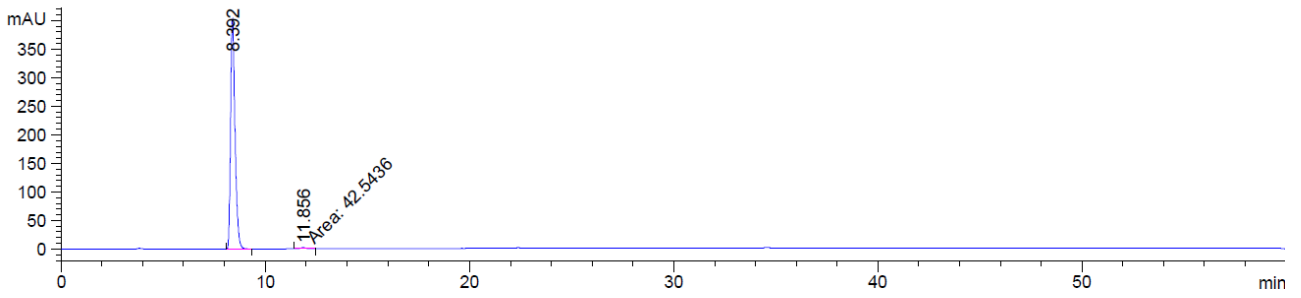

PMP1, PMP1D, Solvent Ratio B

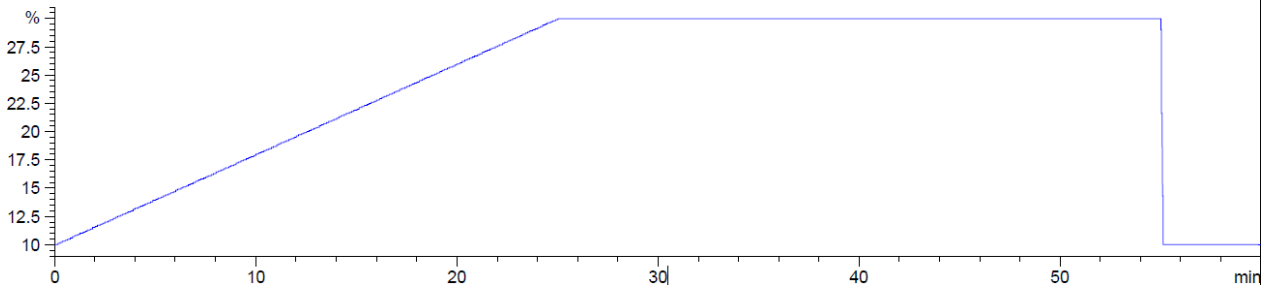

Signal 4: DAD1 D, Sig=230,8 Ref=360,100

| Peak # | RetTime [min] | Type | Width [min] | Area [mAU*s] | Height [mAU] | Area %  |
|--------|---------------|------|-------------|--------------|--------------|---------|
| 1      | 8.392         | BB   | 0.2309      | 6104.79980   | 402.59439    | 99.3079 |
| 2      | 11.856        | MM   | 0.3494      | 42.54363     | 2.02953      | 0.6921  |

Totals :                                    6147.34343    404.62392

**(S)-4-(hydroxymethyl)-3-methylcyclohex-2-en-1-one (2g)**

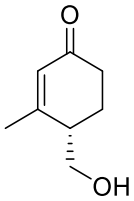

(Chiralpak AS-H, hexane/isopropanol = 70/30, 1 mL/min)

Racemic

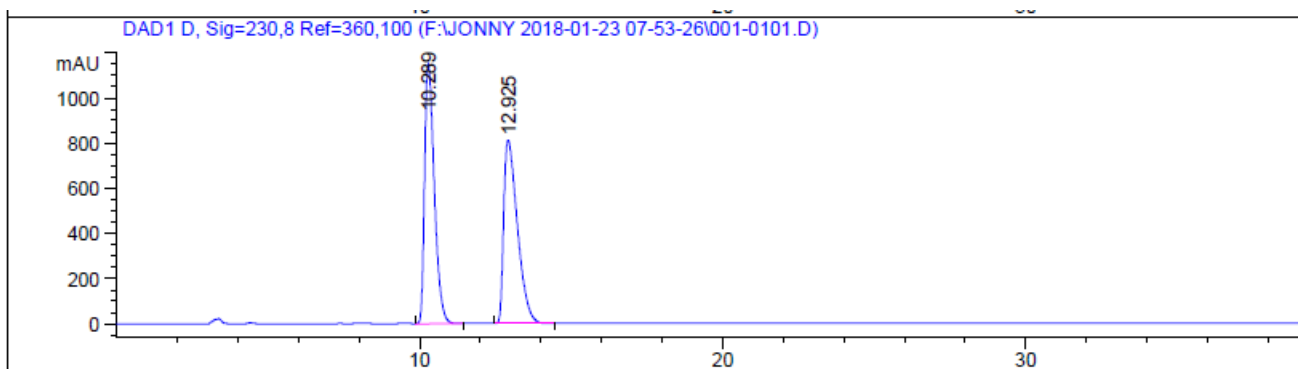

Signal 4: DAD1 D, Sig=230,8 Ref=360,100

| Peak # | RetTime [min] | Type | Width [min] | Area [mAU*s] | Height [mAU] | Area %  |
|--------|---------------|------|-------------|--------------|--------------|---------|
| 1      | 10.289        | BB   | 0.3400      | 2.53910e4    | 1148.01318   | 49.9178 |
| 2      | 12.925        | BB   | 0.4861      | 2.54746e4    | 811.88940    | 50.0822 |

Totals : 5.08656e4 1959.90259

Enantiomerically enriched (85% ee)

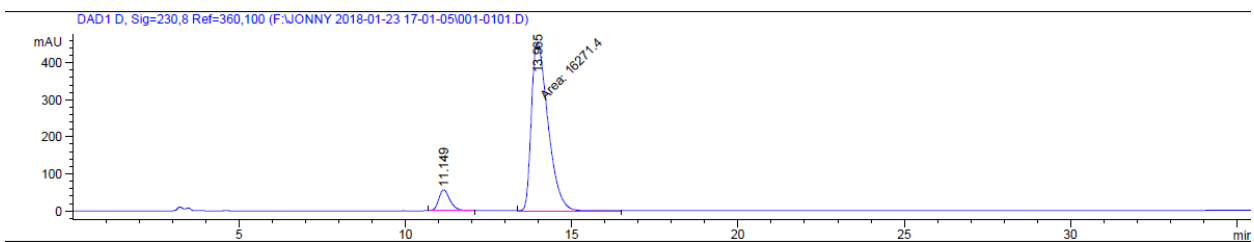

Signal 4: DAD1 D, Sig=230,8 Ref=360,100

| Peak # | RetTime [min] | Type | Width [min] | Area [mAU*s] | Height [mAU] | Area %  |
|--------|---------------|------|-------------|--------------|--------------|---------|
| 1      | 11.149        | BB   | 0.3575      | 1327.38489   | 56.61264     | 7.5425  |
| 2      | 13.965        | MM   | 0.5930      | 1.62714e4    | 457.35071    | 92.4575 |

Totals : 1.75987e4 513.96334

# Enantiomerically enriched (99% ee)

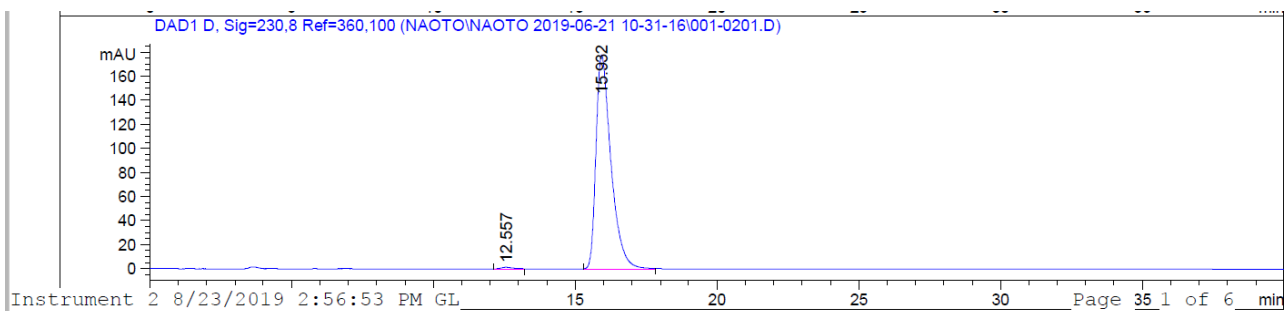

Signal 4: DAD1 D, Sig=230,8 Ref=360,100

| Peak # | RetTime [min] | Type | Width [min] | Area [mAU*s] | Height [mAU] | Area %  |
|--------|---------------|------|-------------|--------------|--------------|---------|
| 1      | 12.557        | BB   | 0.3721      | 36.61283     | 1.39527      | 0.5592  |
| 2      | 15.932        | BB   | 0.5495      | 6510.39063   | 177.69194    | 99.4408 |

Totals : 6547.00346 179.08721

## (S)-4-((benzyloxy)methyl)cyclohex-2-en-1-one (2h)

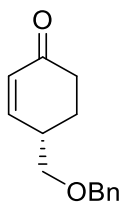

(Chiralpak AS-H, hexane/isopropanol = 70/30, 1 mL/min)

Racemic

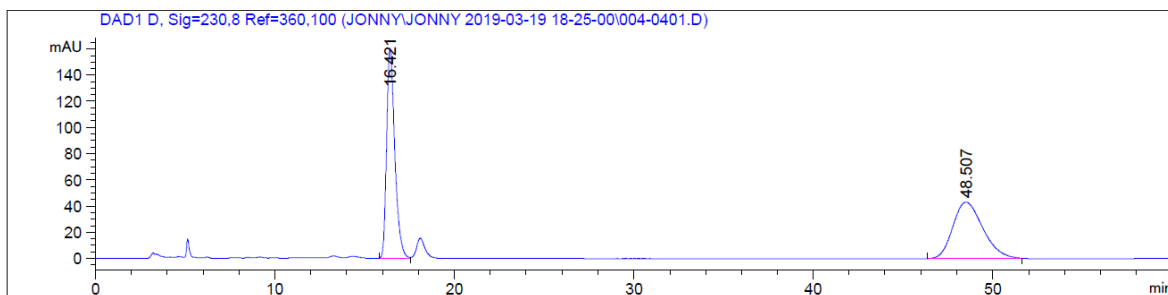

Signal 4: DAD1 D, Sig=230,8 Ref=360,100

| Peak # | RetTime [min] | Type | Width [min] | Area [mAU*s] | Height [mAU] | Area %  |
|--------|---------------|------|-------------|--------------|--------------|---------|
| 1      | 16.421        | BV   | 0.4814      | 5085.22900   | 160.60374    | 50.2528 |
| 2      | 48.507        | BB   | 1.7827      | 5034.05957   | 43.22495     | 49.7472 |

Totals : 1.01193e4 203.82870

Enantiomerically enriched (94% ee)

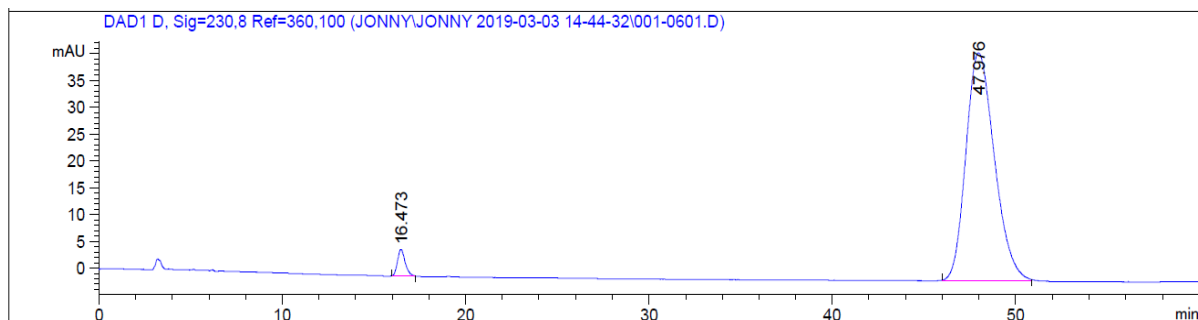

Signal 4: DAD1 D, Sig=230,8 Ref=360,100

| Peak # | RetTime [min] | Type | Width [min] | Area [mAU*s] | Height [mAU] | Area %  |
|--------|---------------|------|-------------|--------------|--------------|---------|
| 1      | 16.473        | BB   | 0.4442      | 147.03416    | 5.01325      | 3.0960  |
| 2      | 47.976        | BB   | 1.6475      | 4602.13770   | 42.49578     | 96.9040 |

Totals : 4749.17186 47.50902

## tert-butyl (S)-((2-methyl-4-oxocyclohex-2-en-1-yl)methyl)(phenyl)carbamate (2i)

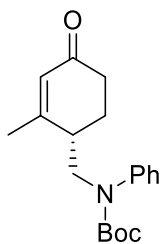

(Chiralpak AD-H, hexane/isopropanol = 90/10, 1 mL/min)

Racemic

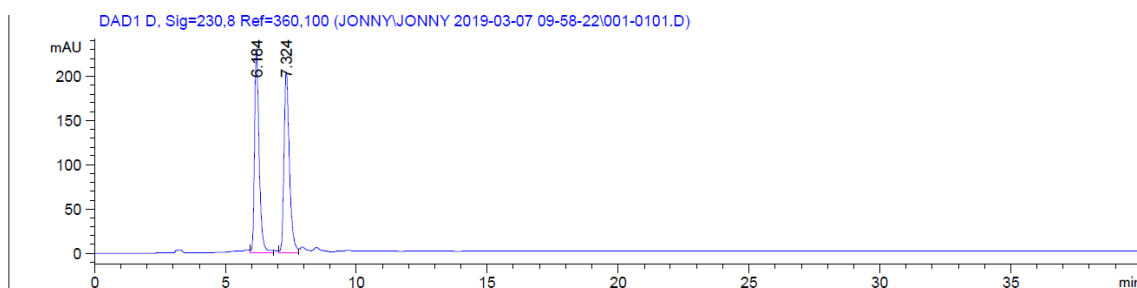

Signal 4: DAD1 D, Sig=230,8 Ref=360,100

| Peak # | RetTime [min] | Type | Width [min] | Area [mAU*s] | Height [mAU] | Area %  |
|--------|---------------|------|-------------|--------------|--------------|---------|
| 1      | 6.184         | VB   | 0.1862      | 2803.81885   | 229.98761    | 49.0076 |
| 2      | 7.324         | BV   | 0.2189      | 2917.37793   | 203.97720    | 50.9924 |

Totals : 5721.19678 433.96481

Enantiomerically enriched (98% ee)

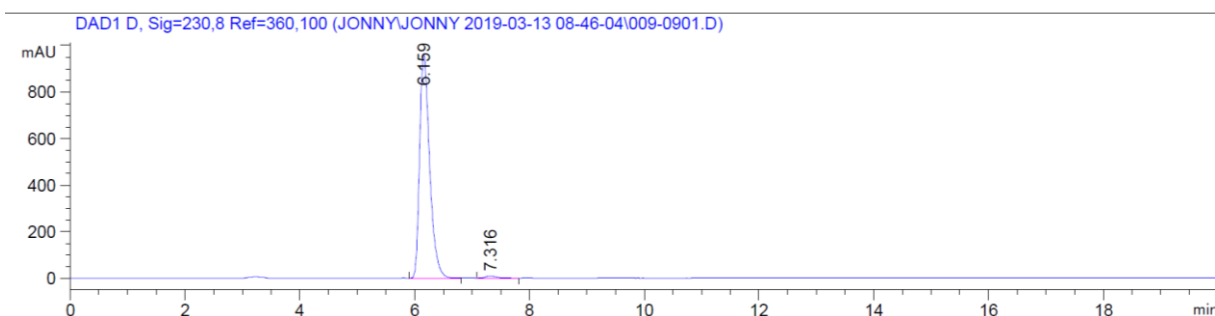

Signal 4: DAD1 D, Sig=230,8 Ref=360,100

| Peak # | RetTime [min] | Type | Width [min] | Area [mAU*s] | Height [mAU] | Area %  |
|--------|---------------|------|-------------|--------------|--------------|---------|
| 1      | 6.159         | VV   | 0.1855      | 1.16636e4    | 961.99121    | 98.9599 |
| 2      | 7.316         | VB   | 0.2138      | 122.58715    | 8.72879      | 1.0401  |

| Peak #   | RetTime [min] | Type | Width [min] | Area [mAU*s] | Height [mAU] | Area % |
|----------|---------------|------|-------------|--------------|--------------|--------|
| Totals : |               |      |             | 1.17862e4    | 970.72000    |        |

# tert-butyl (S)-((2-methyl-4-oxocyclohex-2-en-1-yl)methyl)(prop-2-yn-1-yl)carbamate (2j)

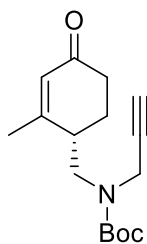

(Chiralpak AD, hexane/isopropanol = 90/10 to 70/30, 1 mL/min)

Gradient: t=0 min: 90/10 – t=25 min: 70/30 – t=55 min: 70/30 – t=55 min: 90/10 – t=60 min: 90/10

Racemic

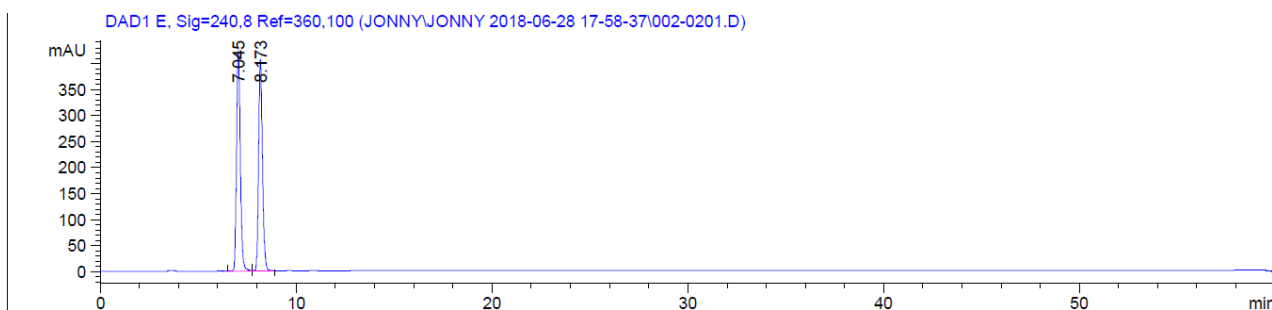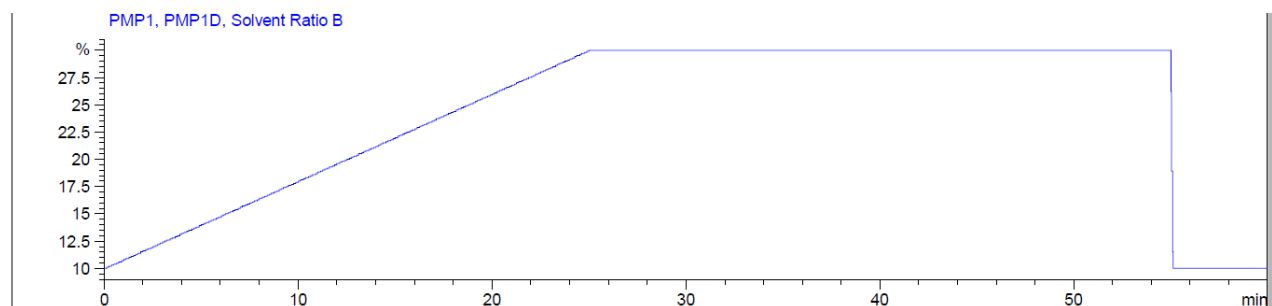

Signal 5: DAD1 E, Sig=240,8 Ref=360,100

| Peak # | RetTime [min] | Type | Width [min] | Area [mAU*s] | Height [mAU] | Area %  |
|--------|---------------|------|-------------|--------------|--------------|---------|
| 1      | 7.045         | BV   | 0.2080      | 5639.05811   | 421.73697    | 50.0425 |
| 2      | 8.173         | VB   | 0.2141      | 5629.48730   | 405.18539    | 49.9575 |

Totals : 1.12685e4 826.92236



Enantiomerically enriched (96% ee)

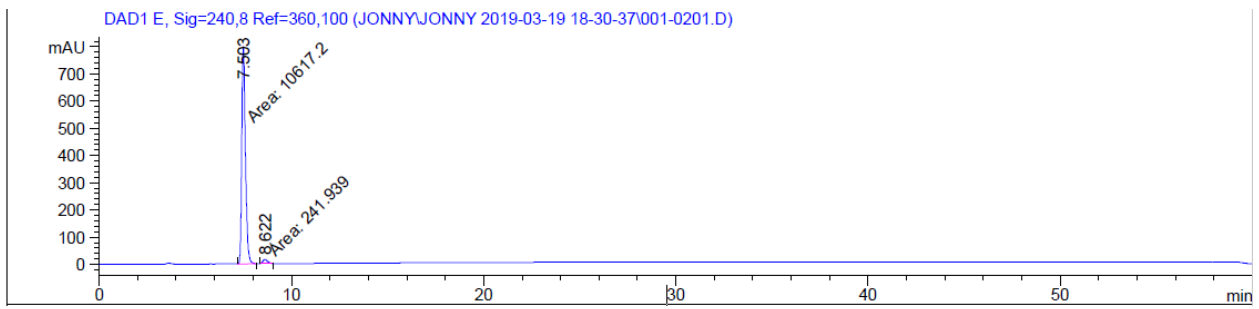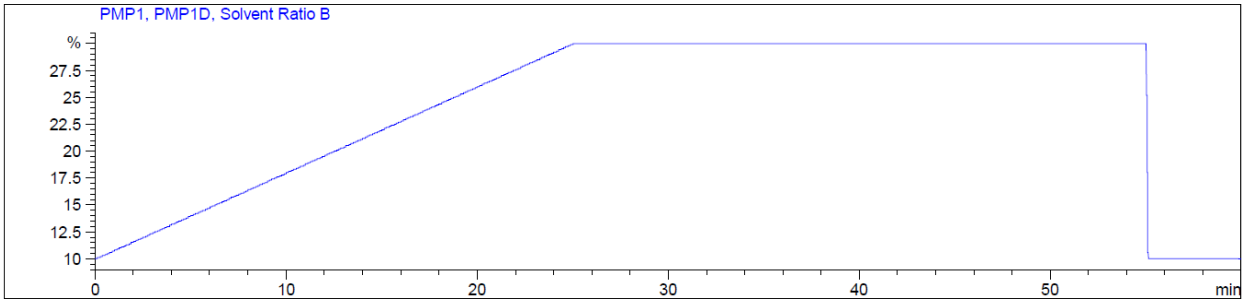

Signal 5: DAD1 E, Sig=240,8 Ref=360,100

| Peak # | RetTime [min] | Type | Width [min] | Area [mAU*s] | Height [mAU] | Area %  |
|--------|---------------|------|-------------|--------------|--------------|---------|
| 1      | 7.503         | MM   | 0.2225      | 1.06172e4    | 795.31525    | 97.7720 |
| 2      | 8.622         | MM   | 0.2789      | 241.93925    | 14.45928     | 2.2280  |

Totals : 1.08591e4 809.77453

**tert-butyl (S)-(1,3-dioxoisindolin-2-yl)((2-methyl-4-oxocyclohex-2-en-1-yl)methyl)carbamate  
(2k)**

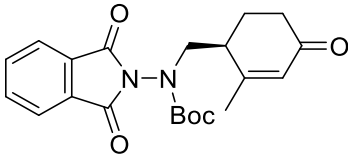

(Chiralpak AD, hexane/isopropanol = 90/10 to 70/30, 1 mL/min)

Gradient: t=0 min: 90/10 – t=25 min: 70/30 – t=55 min: 70/30 – t=55 min: 90/10 – t=60 min: 90/10

Racemic

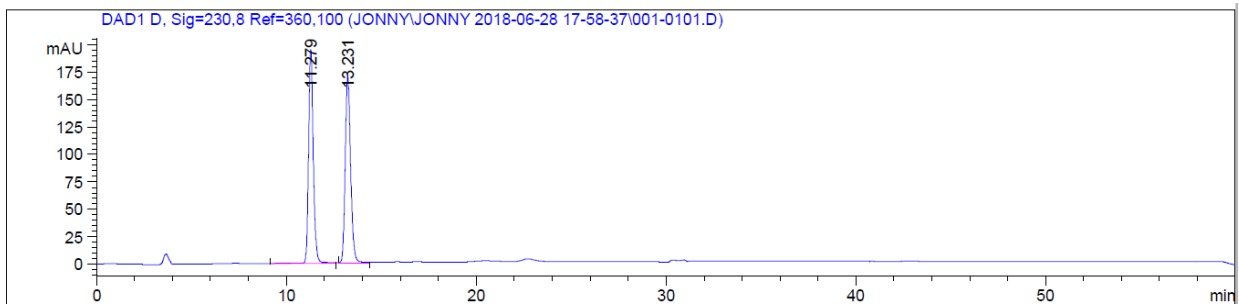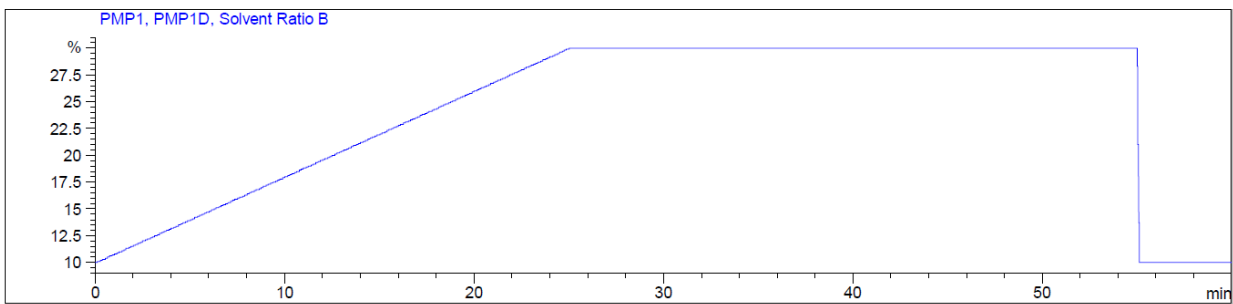

Signal 4: DAD1 D, Sig=230,8 Ref=360,100

| Peak # | RetTime [min] | Type | Width [min] | Area [mAU*s] | Height [mAU] | Area %  |
|--------|---------------|------|-------------|--------------|--------------|---------|
| 1      | 11.279        | VB   | 0.2675      | 3404.79419   | 195.19441    | 50.0962 |
| 2      | 13.231        | BB   | 0.3073      | 3391.71851   | 171.05820    | 49.9038 |

Totals : 6796.51270 366.25261

Enantiomerically enriched (93% ee)

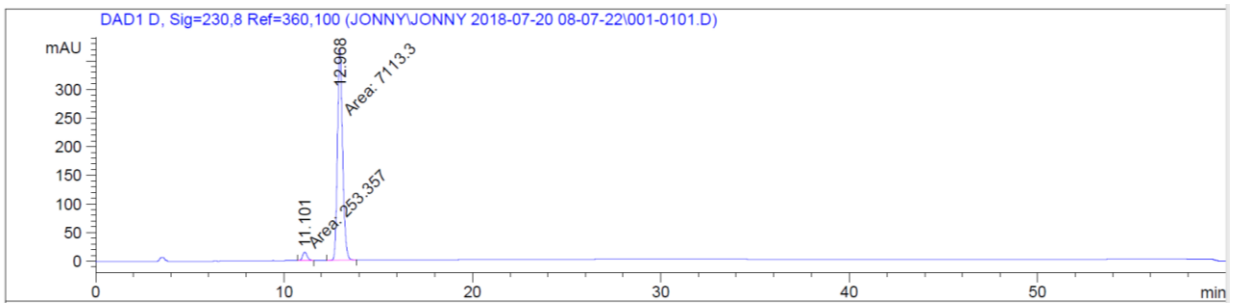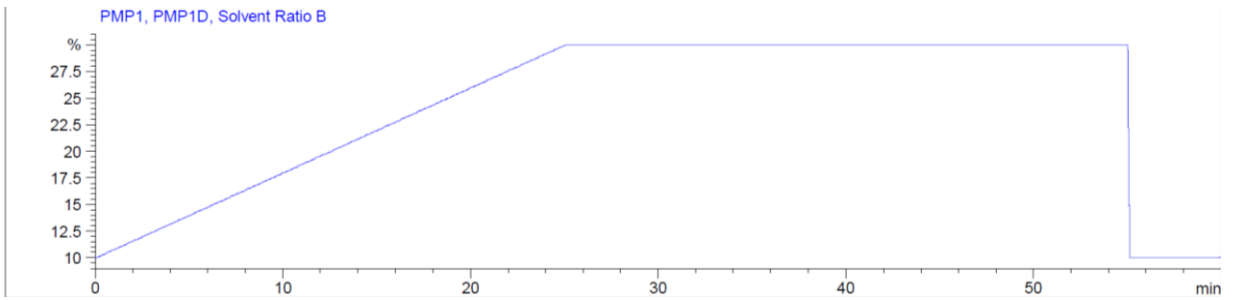

Signal 4: DAD1 D, Sig=230,8 Ref=360,100

| Peak # | RetTime [min] | Type | Width [min] | Area [mAU*s] | Height [mAU] | Area %  |
|--------|---------------|------|-------------|--------------|--------------|---------|
| 1      | 11.101        | MM   | 0.2793      | 253.35730    | 15.12096     | 3.4392  |
| 2      | 12.968        | MM   | 0.3192      | 7113.30127   | 371.38730    | 96.5608 |

Totals : 7366.65857 386.50826

**tert-butyl (S)-((tert-butyldimethylsilyl)oxy)((2-methyl-4-oxocyclohex-2-en-1-yl)methyl)carbamate (2l)**

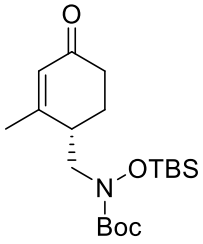

(Chiralpak AS-H, hexane/isopropanol = 90/10 to 70/30, 1 mL/min)

Gradient: t=0 min: 90/10 – t=25 min: 70/30 – t=55 min: 70/30 – t=55 min: 90/10 – t=60 min: 90/10

Racemic

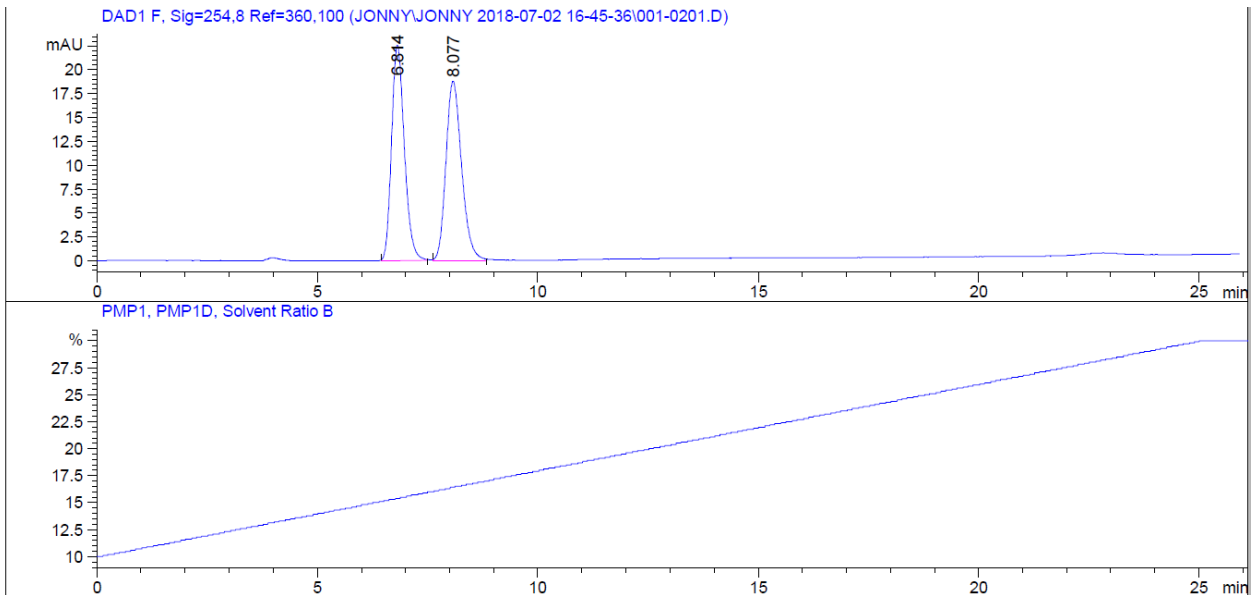

Signal 6: DAD1 F, Sig=254,8 Ref=360,100

| Peak # | RetTime [min] | Type | Width [min] | Area [mAU*s] | Height [mAU] | Area %  |
|--------|---------------|------|-------------|--------------|--------------|---------|
| 1      | 6.814         | BB   | 0.3117      | 456.91620    | 22.61480     | 49.6335 |
| 2      | 8.077         | BB   | 0.3838      | 463.66428    | 18.79531     | 50.3665 |

Totals : 920.58047 41.41011

Enantiomerically enriched (94% ee)

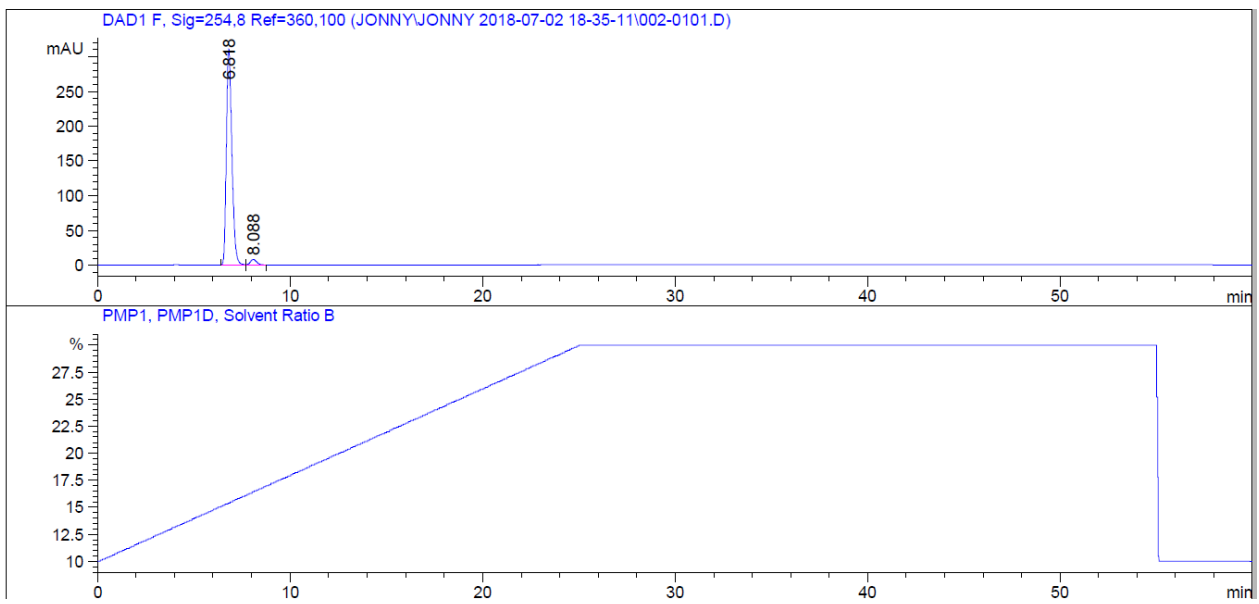

Signal 6: DAD1 F, Sig=254,8 Ref=360,100

| Peak # | RetTime [min] | Type | Width [min] | Area [mAU*s] | Height [mAU] | Area %  |
|--------|---------------|------|-------------|--------------|--------------|---------|
| 1      | 6.818         | BV   | 0.3087      | 6194.50977   | 310.60507    | 96.8416 |
| 2      | 8.088         | VB   | 0.3786      | 202.02948    | 8.11148      | 3.1584  |

Totals :                                   6396.53925   318.71656

## (S)-4-((1H-indol-1-yl)methyl)-3-methylcyclohex-2-en-1-one (2m)

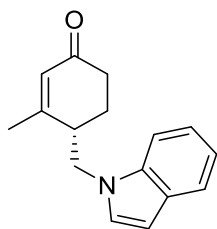

(Chiralpak AD-H, hexane/isopropanol = 95/5, 1 mL/min)

Racemic

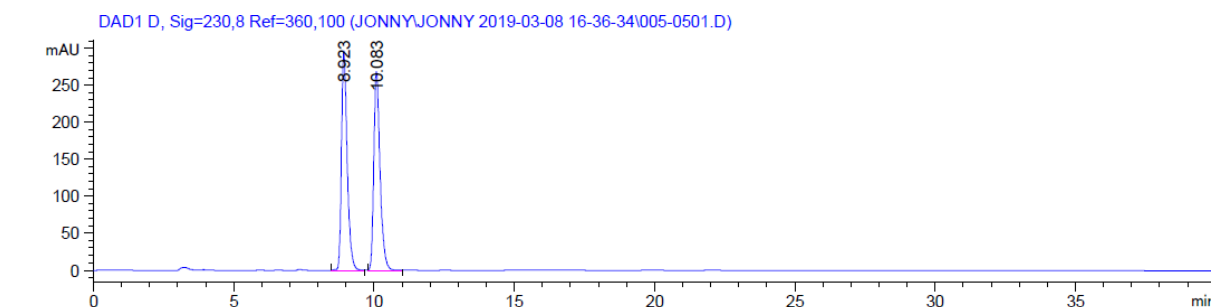

Signal 4: DAD1 D, Sig=230,8 Ref=360,100

| Peak # | RetTime [min] | Type | Width [min] | Area [mAU*s] | Height [mAU] | Area %  |
|--------|---------------|------|-------------|--------------|--------------|---------|
| 1      | 8.923         | BB   | 0.2122      | 4168.90039   | 296.24362    | 49.9874 |
| 2      | 10.083        | BB   | 0.2353      | 4171.00049   | 268.33078    | 50.0126 |

Totals : 8339.90088 564.57440

Enantiomerically enriched (90% ee)

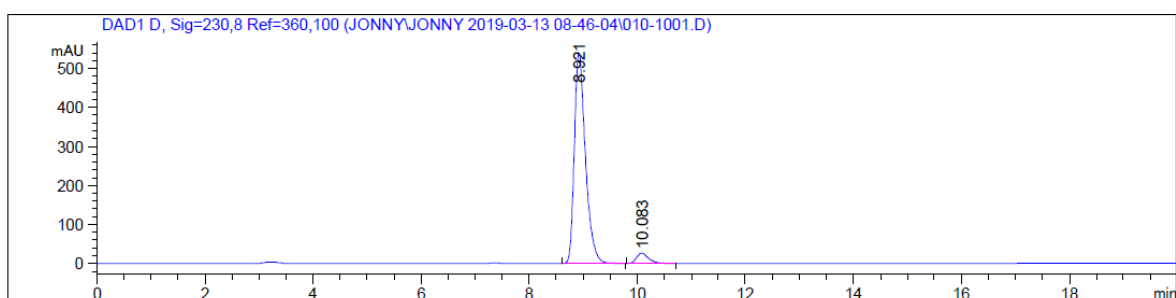

Signal 4: DAD1 D, Sig=230,8 Ref=360,100

| Peak # | RetTime [min] | Type | Width [min] | Area [mAU*s] | Height [mAU] | Area %  |
|--------|---------------|------|-------------|--------------|--------------|---------|
| 1      | 8.921         | BB   | 0.2164      | 7699.76367   | 539.79749    | 94.9232 |
| 2      | 10.083        | BB   | 0.2347      | 411.81213    | 26.58802     | 5.0768  |

Totals : 8111.57581 566.38551

**tert-butyl (S)-furan-2-yl((2-methyl-4-oxocyclohex-2-en-1-yl)methyl)carbamate (2n)**

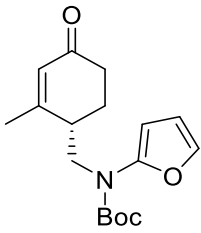

(Chiralpak AD-H, hexane/isopropanol = 90/10, 1 mL/min)

Racemic

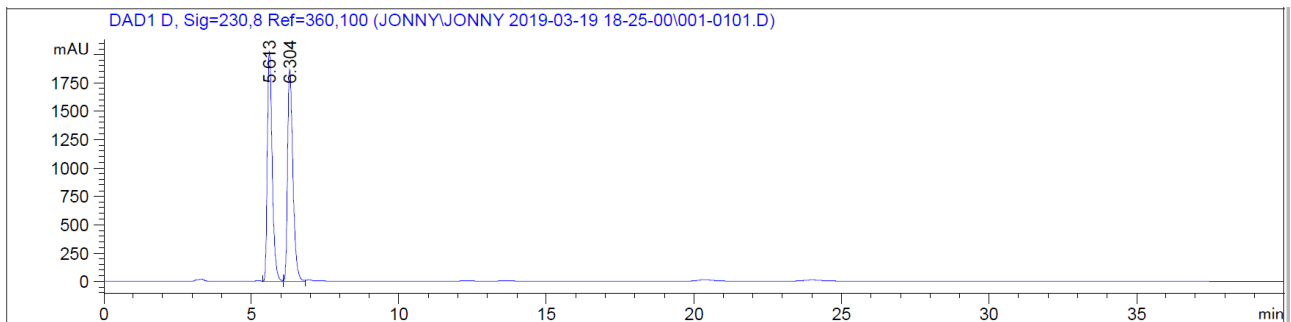

Signal 4: DAD1 D, Sig=230,8 Ref=360,100

| Peak # | RetTime [min] | Type | Width [min] | Area [mAU*s] | Height [mAU] | Area %  |
|--------|---------------|------|-------------|--------------|--------------|---------|
| 1      | 5.613         | VV   | 0.1779      | 2.32727e4    | 2027.19385   | 49.8410 |
| 2      | 6.304         | VV   | 0.1946      | 2.34212e4    | 1863.62048   | 50.1590 |

Totals : 4.66940e4 3890.81433

Enantiomerically enriched (99% ee)

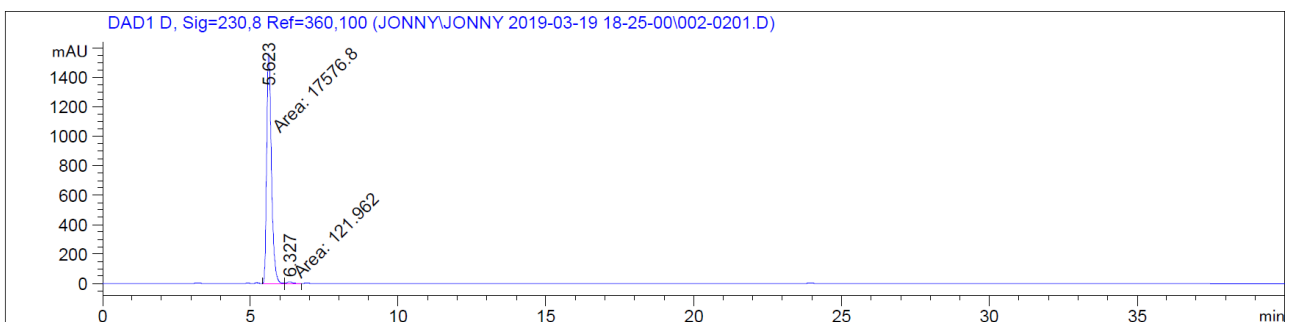

Signal 4: DAD1 D, Sig=230,8 Ref=360,100

| Peak # | RetTime [min] | Type | Width [min] | Area [mAU*s] | Height [mAU] | Area %  |
|--------|---------------|------|-------------|--------------|--------------|---------|
| 1      | 5.623         | MM   | 0.1875      | 1.75768e4    | 1562.52673   | 99.3109 |
| 2      | 6.327         | MM   | 0.1912      | 121.96220    | 10.62852     | 0.6891  |

Totals : 1.76987e4 1573.15525

## benzyl (S)-furan-2-yl((2-methyl-4-oxocyclohex-2-en-1-yl)methyl)carbamate (2o)

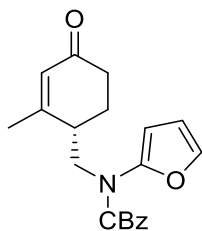

(Chiralpak IA, hexane/isopropanol = 90/10, 1 mL/min)

Racemic

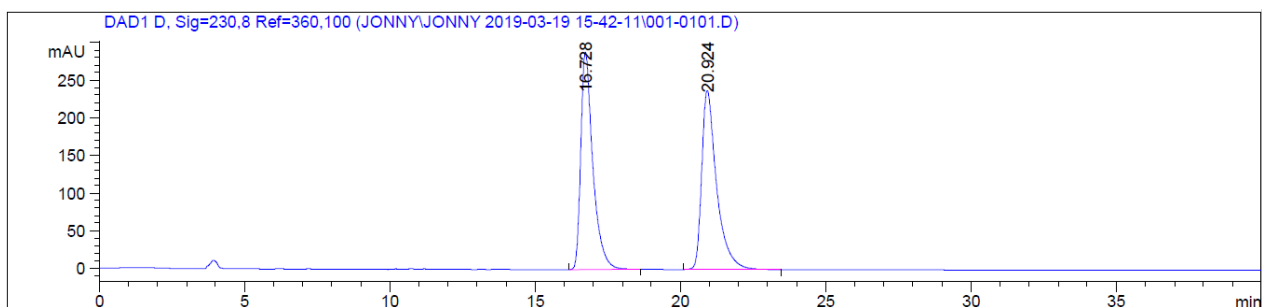

Signal 4: DAD1 D, Sig=230,8 Ref=360,100

| Peak # | RetTime [min] | Type | Width [min] | Area [mAU*s] | Height [mAU] | Area %  |
|--------|---------------|------|-------------|--------------|--------------|---------|
| 1      | 16.728        | BB   | 0.4284      | 8323.62695   | 288.69269    | 49.5246 |
| 2      | 20.924        | BB   | 0.5284      | 8483.44531   | 237.71533    | 50.4754 |

Totals : 1.68071e4 526.40802

Enantiomerically enriched (97% ee)

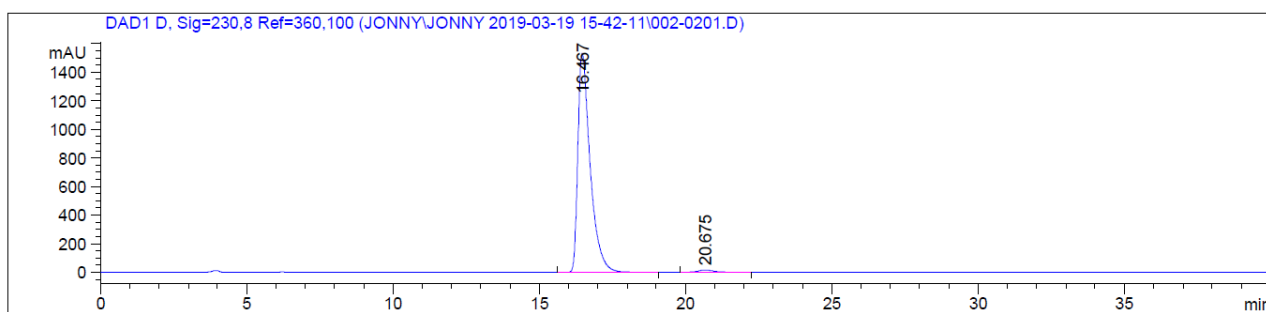

Signal 4: DAD1 D, Sig=230,8 Ref=360,100

| Peak # | RetTime [min] | Type | Width [min] | Area [mAU*s] | Height [mAU] | Area %  |
|--------|---------------|------|-------------|--------------|--------------|---------|
| 1      | 16.467        | BB   | 0.4368      | 4.47903e4    | 1533.11121   | 98.5676 |
| 2      | 20.675        | BB   | 0.5839      | 650.91125    | 16.23034     | 1.4324  |

Totals : 4.54413e4 1549.34154



**(R)-5',6'-dihydro-[1,1':2',1''-terphenyl]-4'(1'H)-one (2p)**

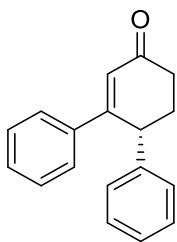

(Chiralpak OD-H, hexane/isopropanol = 90/10, 1 mL/min)

Racemic

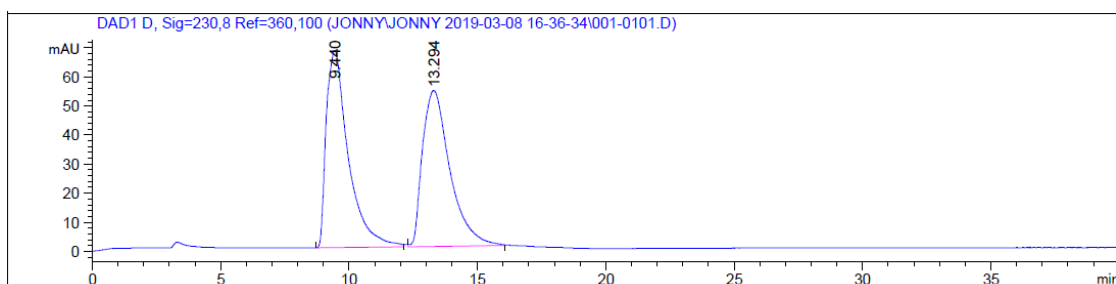

Signal 4: DAD1 D, Sig=230,8 Ref=360,100

| Peak # | RetTime [min] | Type | Width [min] | Area [mAU*s] | Height [mAU] | Area %  |
|--------|---------------|------|-------------|--------------|--------------|---------|
| 1      | 9.440         | BB   | 0.8942      | 4039.70679   | 67.69150     | 50.3764 |
| 2      | 13.294        | BB   | 1.1619      | 3979.34692   | 53.48973     | 49.6236 |

| Peak #   | RetTime [min] | Type | Width [min] | Area [mAU*s] | Height [mAU] | Area % |
|----------|---------------|------|-------------|--------------|--------------|--------|
| Totals : |               |      |             |              |              |        |
|          |               |      |             | 8019.05371   | 121.18122    |        |

Enantiomerically enriched (94% ee)

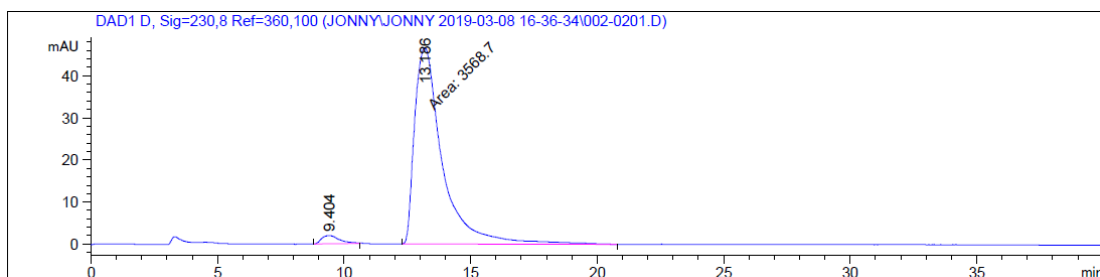

Signal 4: DAD1 D, Sig=230,8 Ref=360,100

| Peak # | RetTime [min] | Type | Width [min] | Area [mAU*s] | Height [mAU] | Area %  |
|--------|---------------|------|-------------|--------------|--------------|---------|
| 1      | 9.404         | BB   | 0.6764      | 101.29274    | 2.02225      | 2.7600  |
| 2      | 13.186        | MM   | 1.2741      | 3568.69653   | 46.68128     | 97.2400 |

Totals : 3669.98927 48.70353

## (S)-3,4-diethylcyclohex-2-en-1-one (2q)

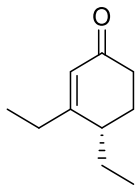

(Chiralpak AS-H, hexane/isopropanol = 70/30, 1 mL/min)

Racemic

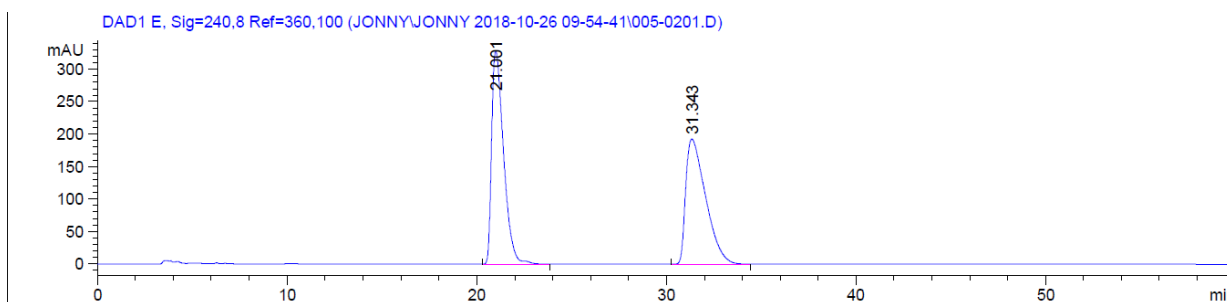

Signal 5: DAD1 E, Sig=240,8 Ref=360,100

| Peak # | RetTime [min] | Type | Width [min] | Area [mAU*s] | Height [mAU] | Area %  |
|--------|---------------|------|-------------|--------------|--------------|---------|
| 1      | 21.001        | BB   | 0.6745      | 1.43800e4    | 328.65839    | 50.5456 |
| 2      | 31.343        | BB   | 1.1140      | 1.40695e4    | 193.11928    | 49.4544 |

Totals : 2.84495e4 521.77766

Enantiomerically enriched (97% ee)

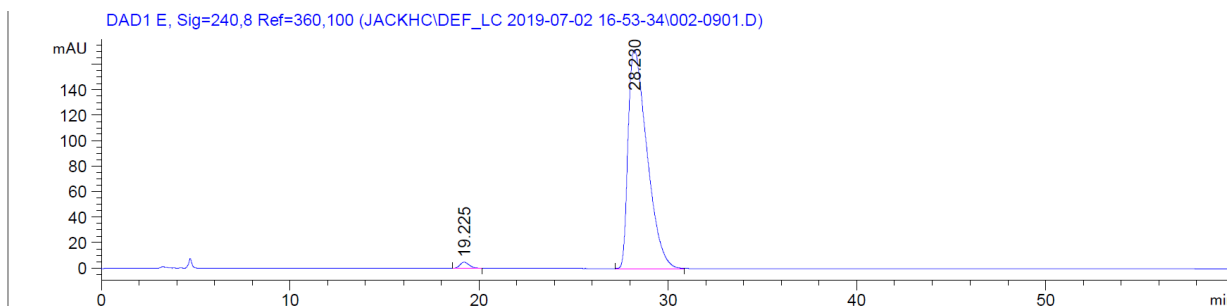

Signal 5: DAD1 E, Sig=240,8 Ref=360,100

| Peak # | RetTime [min] | Type | Width [min] | Area [mAU*s] | Height [mAU] | Area %  |
|--------|---------------|------|-------------|--------------|--------------|---------|
| 1      | 19.225        | BB   | 0.5213      | 166.74107    | 4.84712      | 1.3801  |
| 2      | 28.230        | BB   | 1.0697      | 1.19150e4    | 171.67178    | 98.6199 |

Totals : 1.20817e4 176.51890

## (S)-3,4-dipropylcyclohex-2-en-1-one (2r)

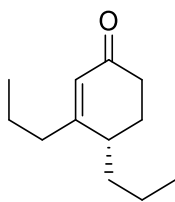

(Chiralpak AS-H, hexane/isopropanol = 90/10 to 70/30, 1 mL/min)

Gradient: t=0 min: 90/10 – t=25 min: 70/30 – t=55 min: 70/30 – t=55 min: 90/10 – t=60 min: 90/10

Racemic

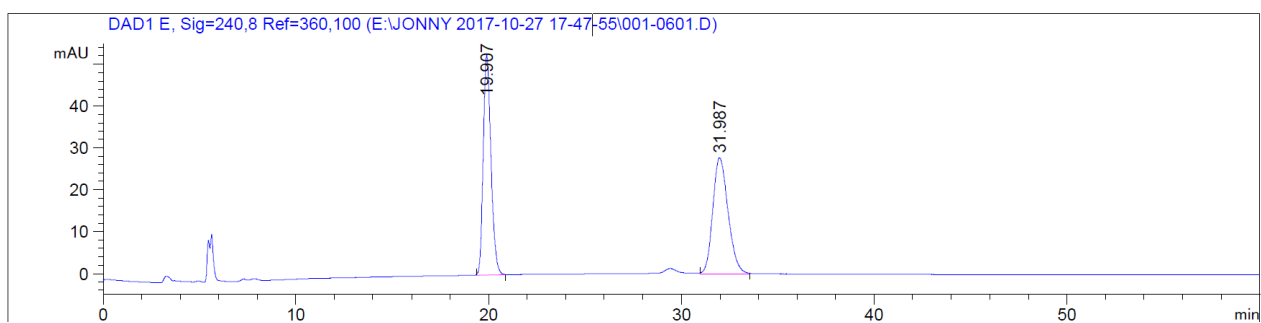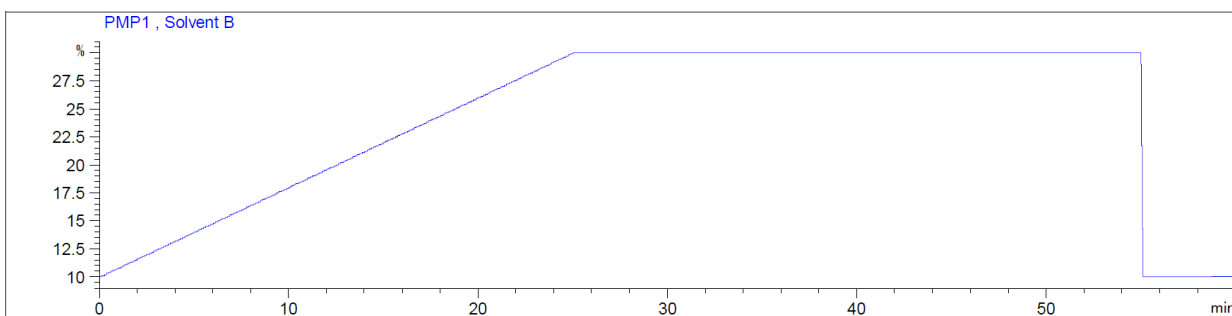

Signal 5: DAD1 E, Sig=240,8 Ref=360,100

| Peak # | RetTime [min] | Type | Width [min] | Area [mAU*s] | Height [mAU] | Area %  |
|--------|---------------|------|-------------|--------------|--------------|---------|
| 1      | 19.907        | BB   | 0.4295      | 1468.44519   | 52.62455     | 49.1561 |
| 2      | 31.987        | BB   | 0.8480      | 1518.86768   | 27.68671     | 50.8439 |

Totals : 2987.31287 80.31126



## (S)-6-methyl-5,6-dihydro-[1,1'-biphenyl]-3(4H)-one (2s)

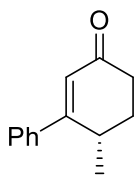

(Chiralpak OD-H, hexane/isopropanol = 85/15, 1 mL/min)

Racemic

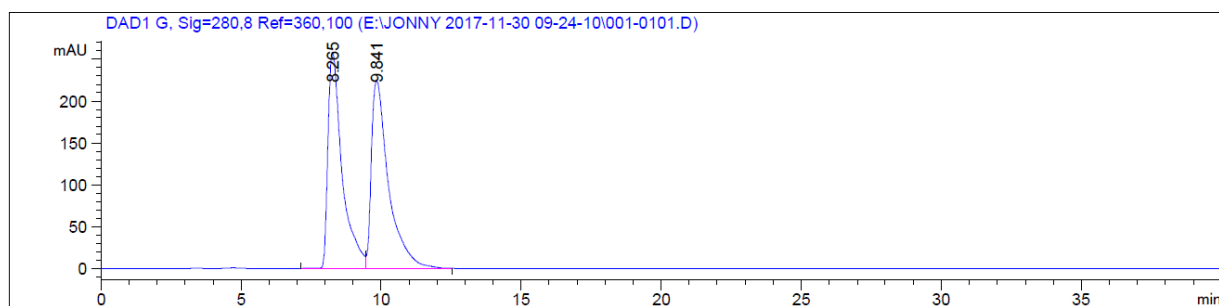

Signal 7: DAD1 G, Sig=280,8 Ref=360,100

| Peak # | RetTime [min] | Type | Width [min] | Area [mAU*s] | Height [mAU] | Area %  |
|--------|---------------|------|-------------|--------------|--------------|---------|
| 1      | 8.265         | BV   | 0.5267      | 9083.68652   | 258.06824    | 48.5998 |
| 2      | 9.841         | VB   | 0.6366      | 9607.10645   | 223.89732    | 51.4002 |

Totals : 1.86908e4 481.96556

Enantiomerically enriched (95% ee)

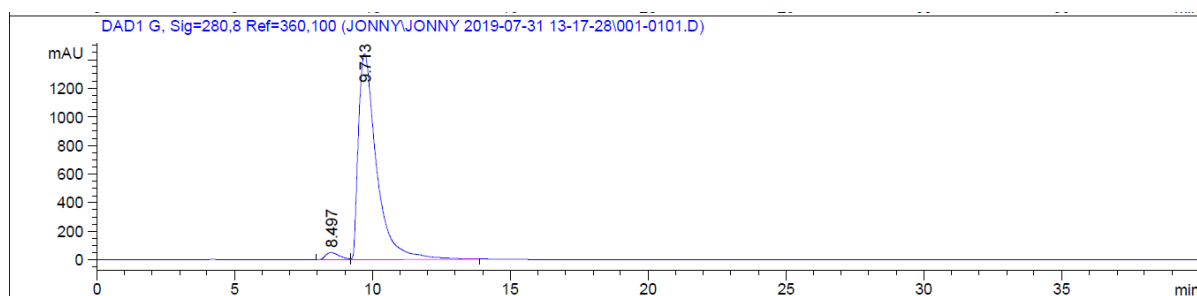

Signal 7: DAD1 G, Sig=280,8 Ref=360,100

| Peak # | RetTime [min] | Type | Width [min] | Area [mAU*s] | Height [mAU] | Area %  |
|--------|---------------|------|-------------|--------------|--------------|---------|
| 1      | 8.497         | BV   | 0.5495      | 1810.90759   | 51.09455     | 2.6618  |
| 2      | 9.713         | VB   | 0.6968      | 6.62215e4    | 1439.25488   | 97.3382 |

Totals : 6.80324e4 1490.34943



# Enantiomerically enriched (93% ee)

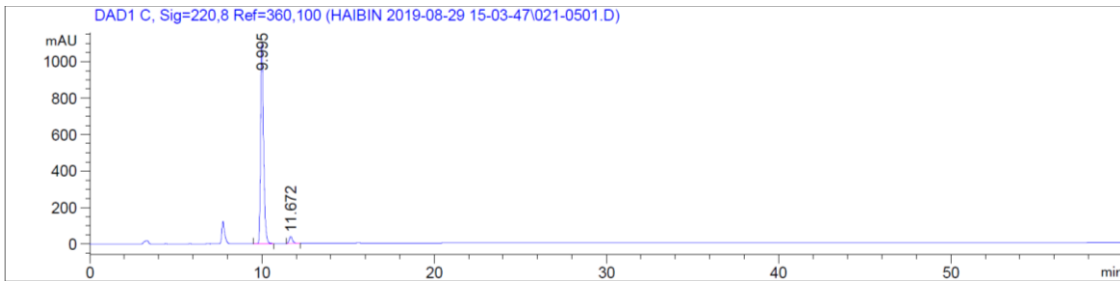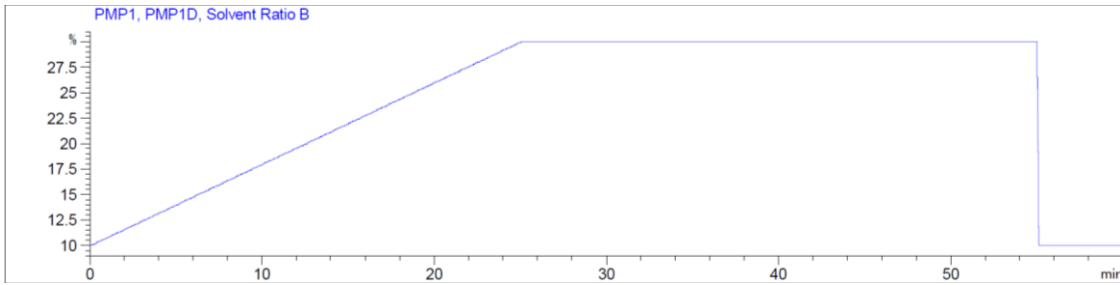

Signal 3: DAD1 C, Sig=220,8 Ref=360,100

| Peak # | RetTime [min] | Type | Width [min] | Area [mAU*s] | Height [mAU] | Area %  |
|--------|---------------|------|-------------|--------------|--------------|---------|
| 1      | 9.995         | BB   | 0.1808      | 1.31082e4    | 1101.80310   | 96.2998 |
| 2      | 11.672        | BB   | 0.1954      | 503.66174    | 38.80825     | 3.7002  |

Totals : 1.36119e4 1140.61135

**(S)-(2-methyl-4-oxocyclohex-2-en-1-yl)methyl 4-methylbenzenesulfonate (4a)**

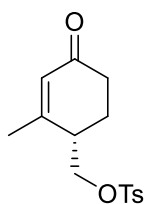

(Chiralpak AD-H, hexane/isopropanol = 90/10 to 70/30, 1 mL/min)

Gradient: t=0 min: 90/10 – t=25 min: 70/30 – t=55 min: 70/30 – t=55 min: 90/10 – t=60 min: 90/10

Racemic

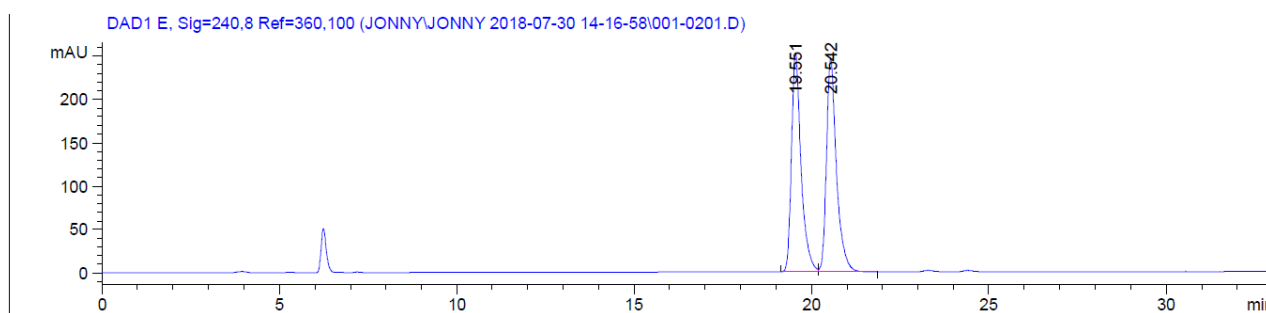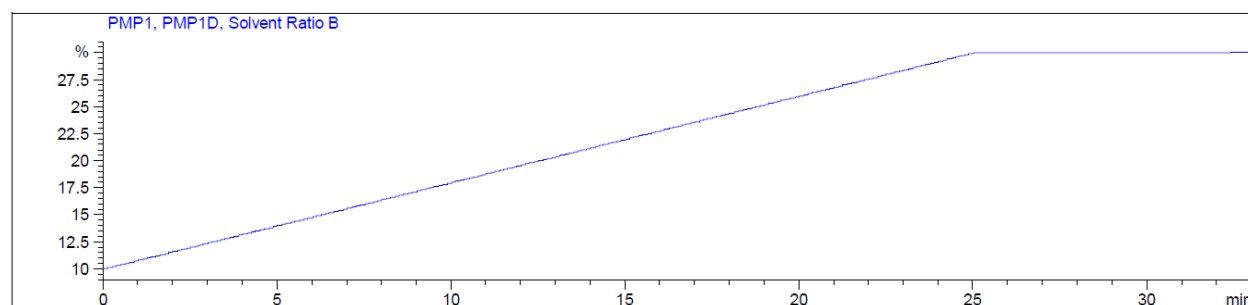

Signal 5: DAD1 E, Sig=240,8 Ref=360,100

| Peak # | RetTime [min] | Type | Width [min] | Area [mAU*s] | Height [mAU] | Area %  |
|--------|---------------|------|-------------|--------------|--------------|---------|
| 1      | 19.551        | BV   | 0.2834      | 4739.95898   | 252.01918    | 49.6264 |
| 2      | 20.542        | VB   | 0.2961      | 4811.31787   | 246.10129    | 50.3736 |

Totals : 9551.27686 498.12047



Enantiomerically enriched (99% ee)

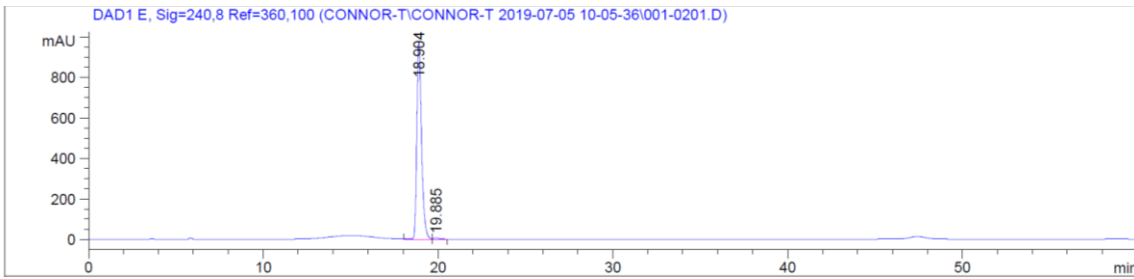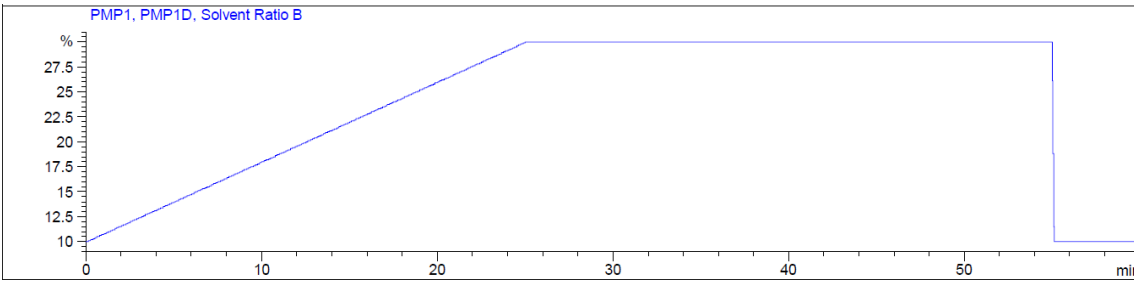

Signal 5: DAD1 E, Sig=240,8 Ref=360,100

| Peak # | RetTime [min] | Type | Width [min] | Area [mAU*s] | Height [mAU] | Area %  |
|--------|---------------|------|-------------|--------------|--------------|---------|
| 1      | 18.904        | VV   | 0.2808      | 1.81411e4    | 976.06671    | 99.2915 |
| 2      | 19.885        | VB   | 0.2914      | 129.44725    | 6.52614      | 0.7085  |

Totals : 1.82705e4 982.59285

## (S)-4-(azidomethyl)-3-methylcyclohex-2-en-1-one (4b)

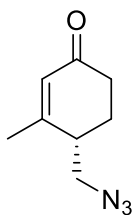

(Chiralpak AS-H, hexane/isopropanol = 70/30, 1 mL/min)

Racemic

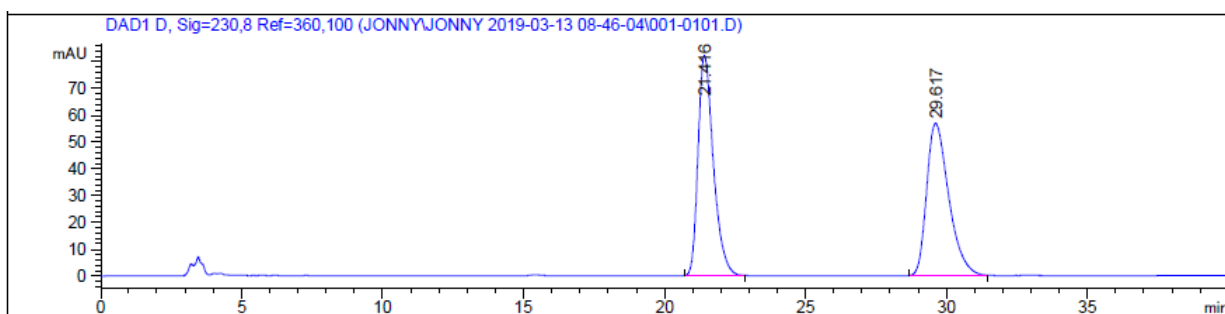

Signal 4: DAD1 D, Sig=230,8 Ref=360,100

| Peak # | RetTime [min] | Type | Width [min] | Area [mAU*s] | Height [mAU] | Area %  |
|--------|---------------|------|-------------|--------------|--------------|---------|
| 1      | 21.416        | BB   | 0.5771      | 3107.86377   | 82.20157     | 50.0235 |
| 2      | 29.617        | BB   | 0.8324      | 3104.93774   | 56.92233     | 49.9765 |

Totals : 6212.80151 139.12389

Enantiomerically enriched (99% ee)

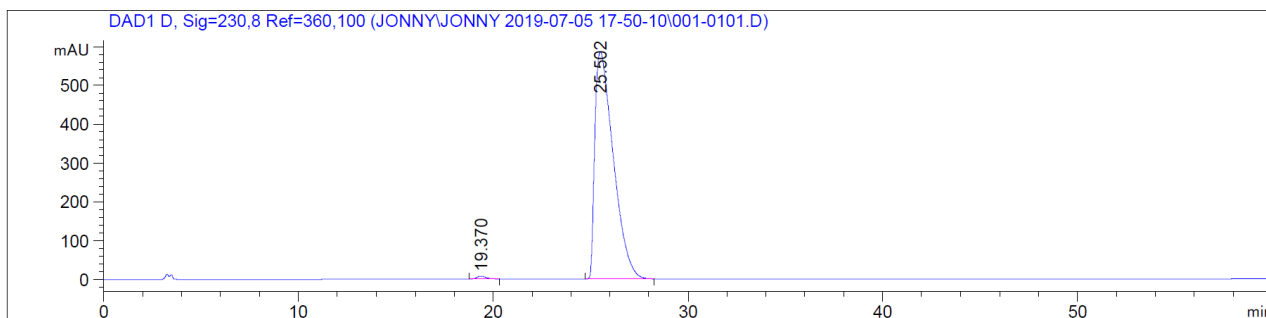

Signal 4: DAD1 D, Sig=230,8 Ref=360,100

| Peak # | RetTime [min] | Type | Width [min] | Area [mAU*s] | Height [mAU] | Area %  |
|--------|---------------|------|-------------|--------------|--------------|---------|
| 1      | 19.370        | BB   | 0.4887      | 231.30156    | 7.20183      | 0.5964  |
| 2      | 25.502        | BB   | 1.0092      | 3.85505e4    | 586.23370    | 99.4036 |

Totals : 3.87818e4 593.43553

### (S)-3-methyl-4-((phenylthio)methyl)cyclohex-2-en-1-one (4c)

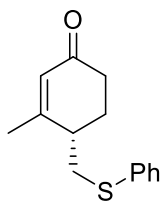

(Chiralpak AS-H, hexane/isopropanol = 70/30, 1 mL/min)

Racemic

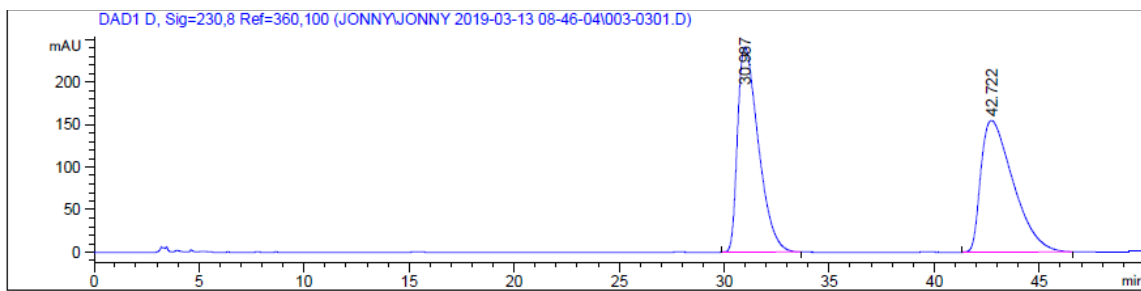

Signal 4: DAD1 D, Sig=230,8 Ref=360,100

| Peak # | RetTime [min] | Type | Width [min] | Area [mAU*s] | Height [mAU] | Area %  |
|--------|---------------|------|-------------|--------------|--------------|---------|
| 1      | 30.987        | BB   | 1.0654      | 1.65594e4    | 241.05490    | 50.0428 |
| 2      | 42.722        | BB   | 1.6323      | 1.65310e4    | 154.74957    | 49.9572 |

Totals : 3.30904e4 395.80447

Enantiomerically enriched (97% ee)

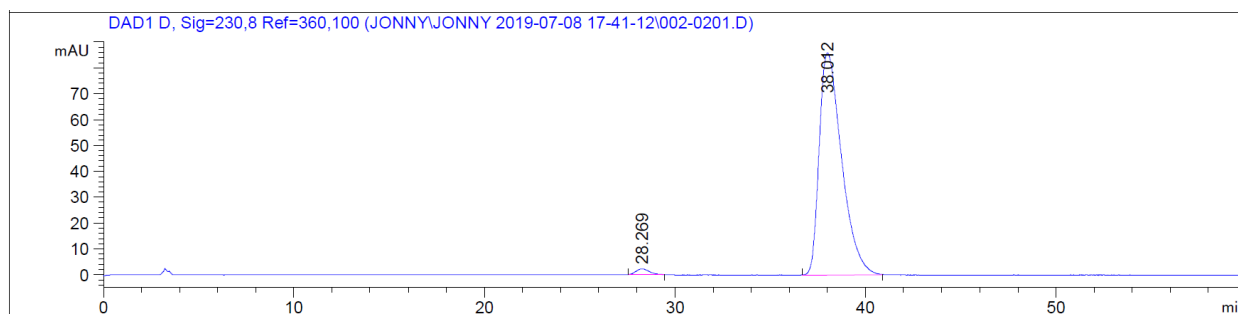

Signal 4: DAD1 D, Sig=230,8 Ref=360,100

| Peak # | RetTime [min] | Type | Width [min] | Area [mAU*s] | Height [mAU] | Area %  |
|--------|---------------|------|-------------|--------------|--------------|---------|
| 1      | 28.269        | BB   | 0.6852      | 114.13937    | 2.25260      | 1.6012  |
| 2      | 38.012        | BB   | 1.2526      | 7014.10840   | 85.90630     | 98.3988 |

Totals : 7128.24776 88.15890

**(S)-S-methyl O-((2-methyl-4-oxocyclohex-2-en-1-yl)methyl) carbonodithioate (4d)**

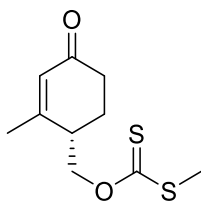

(Chiralpak AS-H, hexane/isopropanol = 70/30, 1 mL/min)

Racemic

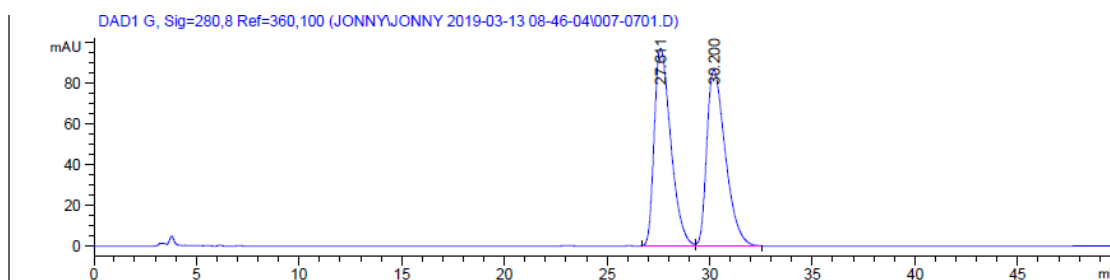

Signal 7: DAD1 G, Sig=280,8 Ref=360,100

| Peak # | RetTime [min] | Type | Width [min] | Area [mAU*s] | Height [mAU] | Area %  |
|--------|---------------|------|-------------|--------------|--------------|---------|
| 1      | 27.611        | BV   | 0.8598      | 5412.90186   | 96.88644     | 49.9306 |
| 2      | 30.200        | VB   | 0.9676      | 5427.95654   | 86.56201     | 50.0694 |

Totals : 1.08409e4 183.44846

Enantiomerically enriched (99% ee)

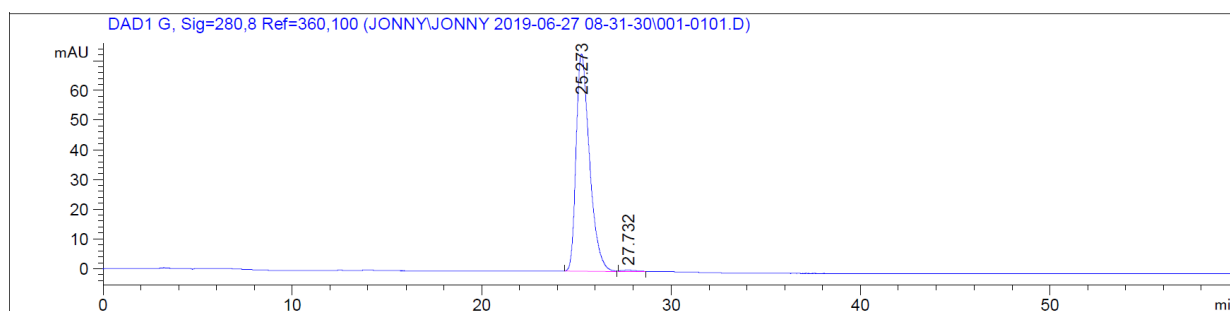

Signal 7: DAD1 G, Sig=280,8 Ref=360,100

| Peak # | RetTime [min] | Type | Width [min] | Area [mAU*s] | Height [mAU] | Area %  |
|--------|---------------|------|-------------|--------------|--------------|---------|
| 1      | 25.273        | BB   | 0.7540      | 3598.72388   | 73.15093     | 99.4047 |
| 2      | 27.732        | BB   | 0.5973      | 21.55198     | 4.41689e-1   | 0.5953  |

Totals : 3620.27586 73.59262

**(3aR,7aS)-3a-methyl-3-thioxohexahydroisobenzofuran-5(3H)-one (4e)**

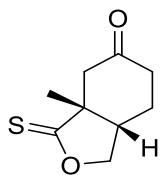

(Chiralpak AS-H, hexane/isopropanol = 70/30, 1 mL/min)

Racemic

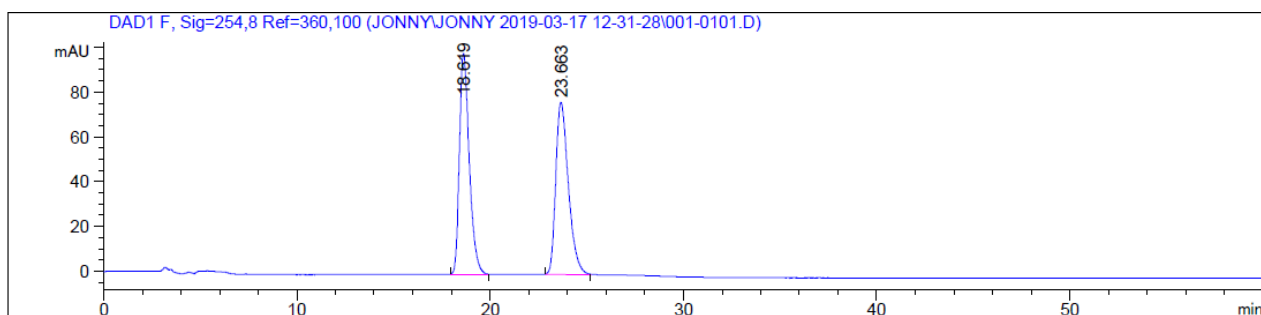

Signal 6: DAD1 F, Sig=254,8 Ref=360,100

| Peak # | RetTime [min] | Type | Width [min] | Area [mAU*s] | Height [mAU] | Area %  |
|--------|---------------|------|-------------|--------------|--------------|---------|
| 1      | 18.619        | BB   | 0.5409      | 3489.74048   | 98.61083     | 50.0184 |
| 2      | 23.663        | BB   | 0.6929      | 3487.16846   | 76.91927     | 49.9816 |

Totals : 6976.90894 175.53011

Enantiomerically enriched (97% ee)

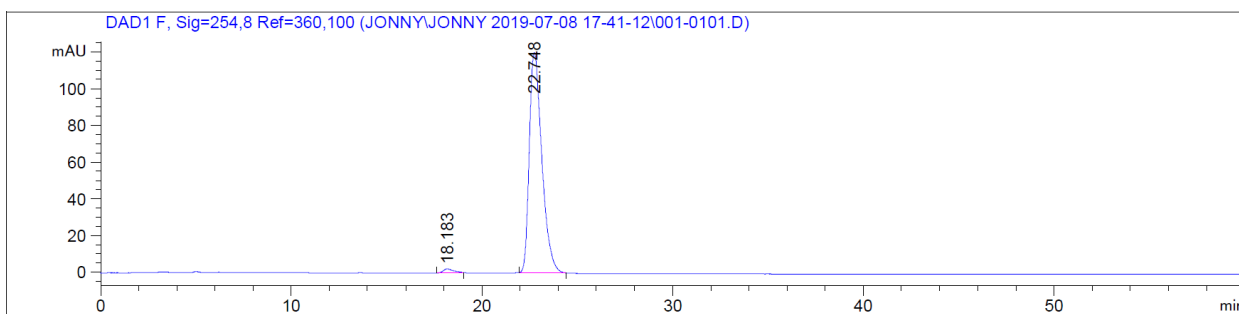

Signal 6: DAD1 F, Sig=254,8 Ref=360,100

| Peak # | RetTime [min] | Type | Width [min] | Area [mAU*s] | Height [mAU] | Area %  |
|--------|---------------|------|-------------|--------------|--------------|---------|
| 1      | 18.183        | BB   | 0.5695      | 86.40878     | 2.18456      | 1.5474  |
| 2      | 22.748        | BB   | 0.6980      | 5497.60156   | 120.10945    | 98.4526 |

Totals : 5584.01035 122.29401

**tert-Butyl (2*aS*,2*a*1*S*)-6-hydroxy-2*a*1-methyl-5-oxo-2*a*,2*a*1,3,4,5,7-hexahydrobenzo[*cd*]indole-1(2*H*)-carboxylate (4*f*)**

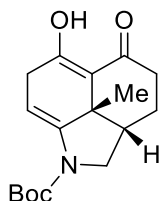

(Chiralpak AS, hexane/isopropanol = 99/1, 1 mL/min)

Racemic

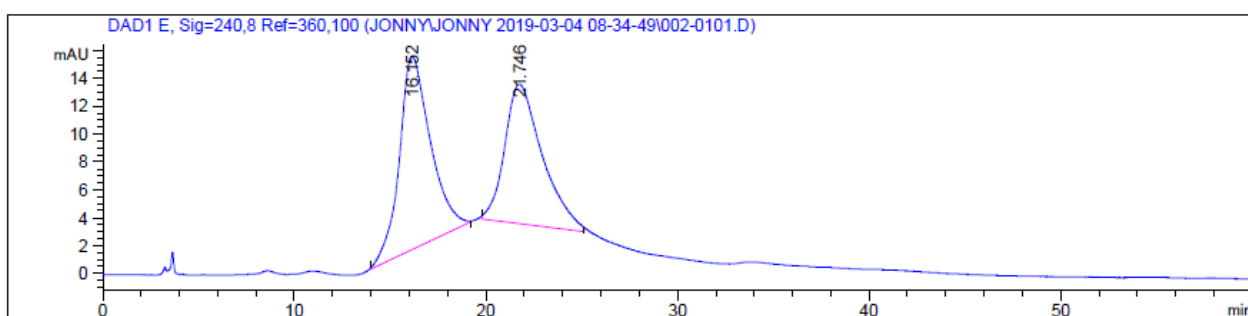

Signal 5: DAD1 E, Sig=240,8 Ref=360,100

| Peak # | RetTime [min] | Type | Width [min] | Area [mAU*s] | Height [mAU] | Area %  |
|--------|---------------|------|-------------|--------------|--------------|---------|
| 1      | 16.152        | BB   | 1.5692      | 1564.09851   | 13.89599     | 53.3592 |
| 2      | 21.746        | BB   | 1.8339      | 1367.16504   | 10.00704     | 46.6408 |

Totals : 2931.26355 23.90304

Enantiomerically enriched (98% ee)

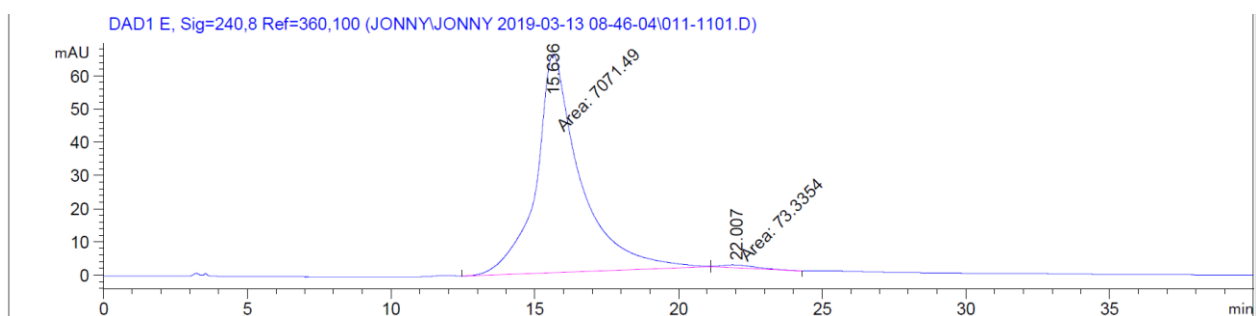

Signal 5: DAD1 E, Sig=240,8 Ref=360,100

| Peak # | RetTime [min] | Type | Width [min] | Area [mAU*s] | Height [mAU] | Area %  |
|--------|---------------|------|-------------|--------------|--------------|---------|
| 1      | 15.636        | MM   | 1.7908      | 7071.49365   | 65.81398     | 98.9736 |
| 2      | 22.007        | MM   | 1.3783      | 73.33542     | 8.86800e-1   | 1.0264  |

Totals : 7144.82907 66.70078

## **2.4 Computational details**

## Computational Methods:

Geometry optimizations were carried out with *Gaussian*<sup>18</sup> at the ONIOM(M06-2X/6-31G(d,p):UFF) level of theory and all stationary points were confirmed by vibrational analysis at the same level. M06-2X+D3/def2-TZVP single point energies<sup>19</sup> were then evaluated including an SMD description of diethyl ether.<sup>20</sup> Quasi-rigid-rotor harmonic oscillator Gibbs free energies were evaluated at 298K with *Goodvibes*<sup>21a-b</sup> using vibrational scaling factors: 0.98 for the high-level layer<sup>22</sup> and 0.87 for the low-level layer.<sup>23</sup> Molecular graphics were prepared using *Pymol*.<sup>24</sup>

## Reaction mechanism:

Transition structures (TSs) were located for substrate **1a** undergoing successive  $\alpha$ -deprotonation and  $\gamma$ -reprotonation by BIMP catalyst **3i**, resulting in the Gibbs energy profile shown in the figure below. The reprotonation TSs are higher in energy, making this the rate- and enantio-determining step.<sup>25</sup> An extensive search of different conformations was made for the  $\gamma$ -reprotonation TS structures (*vide infra*), but not for the  $\alpha$ -deprotonation. It is possible that the deprotonation step could proceed through more stable TSs, but it will only reinforce the observation that the rate and selectivity of the reaction was determined during the  $\gamma$ -reprotonation. As it is discussed in the manuscript, this is consistent with the experimental observations with D-labelled substrates.

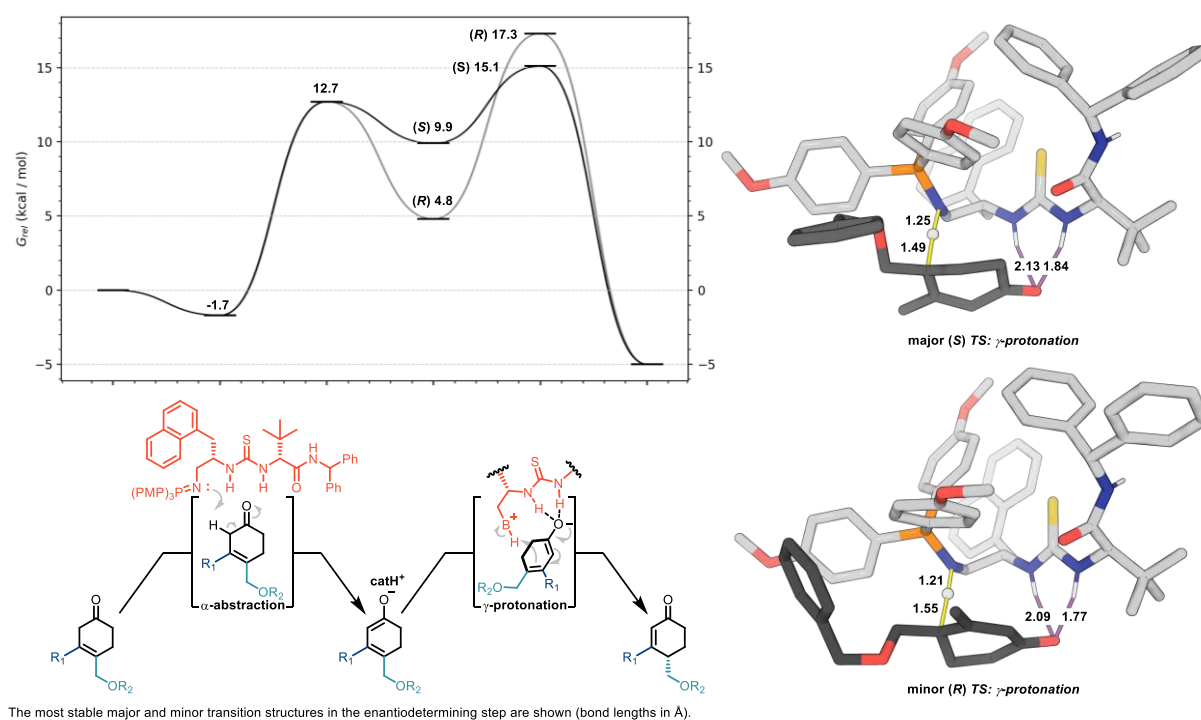



Gibbs energy profile for the reaction of **1a** catalysed by **3i**, showing the  $\alpha$ -deprotonation and  $\gamma$ -reprotonation steps for (*R*) and (*S*) products.

Once that it was established that the  $\gamma$ -reprotonation determines the selectivity of the reaction, the contribution of each TSs to the product distribution was calculated by a Maxwell Boltzmann distribution using its calculated  $\Delta\Delta G$ . These contributions were added for all TSs yielding (*R*) and (*S*) products, respectively, which allows comparison of the enantiomeric excesses determined experimentally and by the calculations. We found a good agreement in both cases: 98% for **1a** (exp: 99%) and 87% for **1h** (exp: 92%)

### Conformational analysis of the $\gamma$ -reprotonation step:

We performed a systematic conformational analysis of competing TSs, including varied substrate ring conformations and rotations about single bonds, different catalyst conformations and different interactions between the catalyst and the substrates:

#### - Conformation of the -OBn substituent of the substrate:

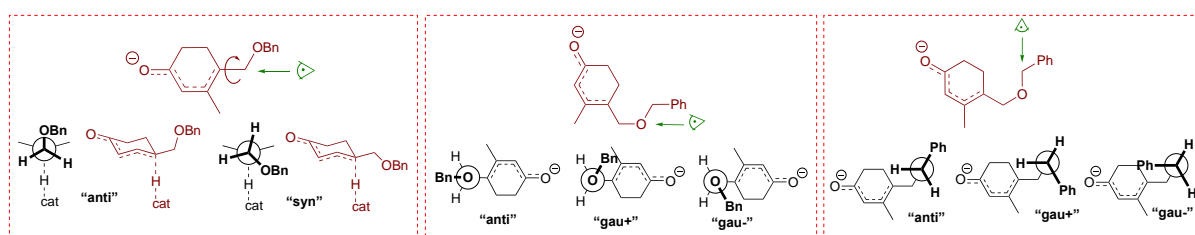

#### - “Chair” or “Boat” conformation of the substrate ring:

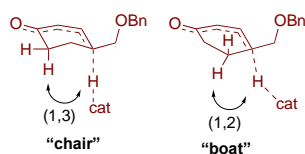

#### - “Activation mode” of the catalyst: the substrate is re-protonated from the R-N=P(PMP)<sub>3</sub> group of from the thiourea group:

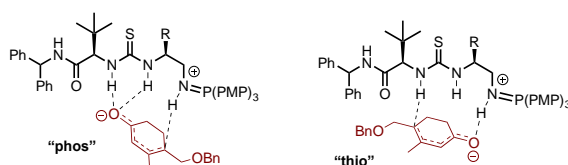

The protonation from the thiourea group was only considered for combination of catalyst **3i** and substrate **1a**. The energy penalty for TSs corresponding to the “thio” protonation is for all cases (for the different conformations of the substrate) larger than 14 kcal/mol. Therefore, the “thio” reprotonation mode was not studied for substrate **1h**.

**- Conformations of the catalyst:** Two possible conformations of the backbone of the catalyst were considered for the combination of catalyst **3i** and substrate **1a**:

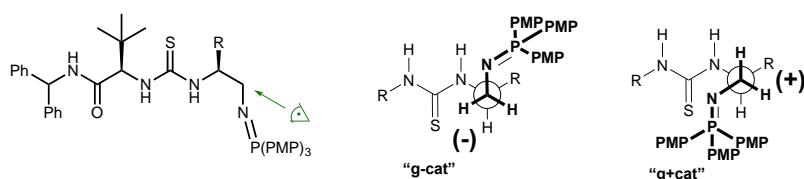

In all TSs (with different substrate conformations) the energy penalty of the conformation (-) is higher than 5 kcal/mol; therefore, the study was not repeated for substrate **1h**.

TSs corresponding to “thio” reprotonation mode and (-) catalyst conformation were not sought, since they correspond to the combination of two destabilizing factors.

**- Conformations of the catalyst naphthyl ring:** There are 6 possible conformations of the naphthyl group. To reduce the number of calculations, initially one of them (3a) was considered, and only in those cases in which the energy was less than 4 kcal/mol (with respect to the most stable TSs) the rest of the conformations were included in the search. In those cases in which the 6 conformations were considered, the energy spans less than 2.5 kcal/mol, indicating that the threshold used to filter out the necessity of including all conformations is appropriate.

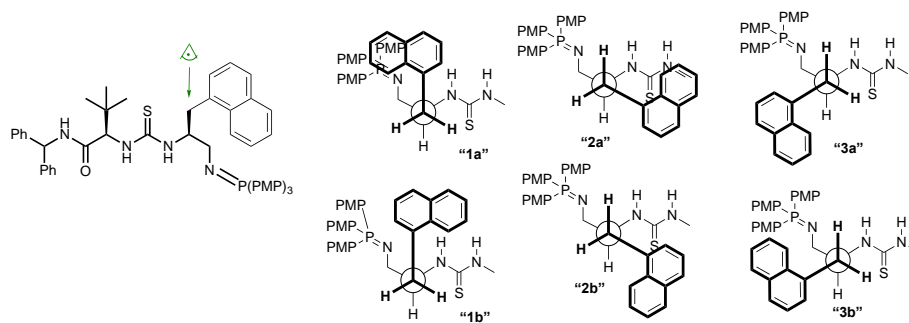

To differentiate this large number of TSs, in following sections (see supplementary computational file) they are named according to a scheme that includes information of the substrate, absolute configuration of the product and the conformation of substrate and catalyst.

For example:

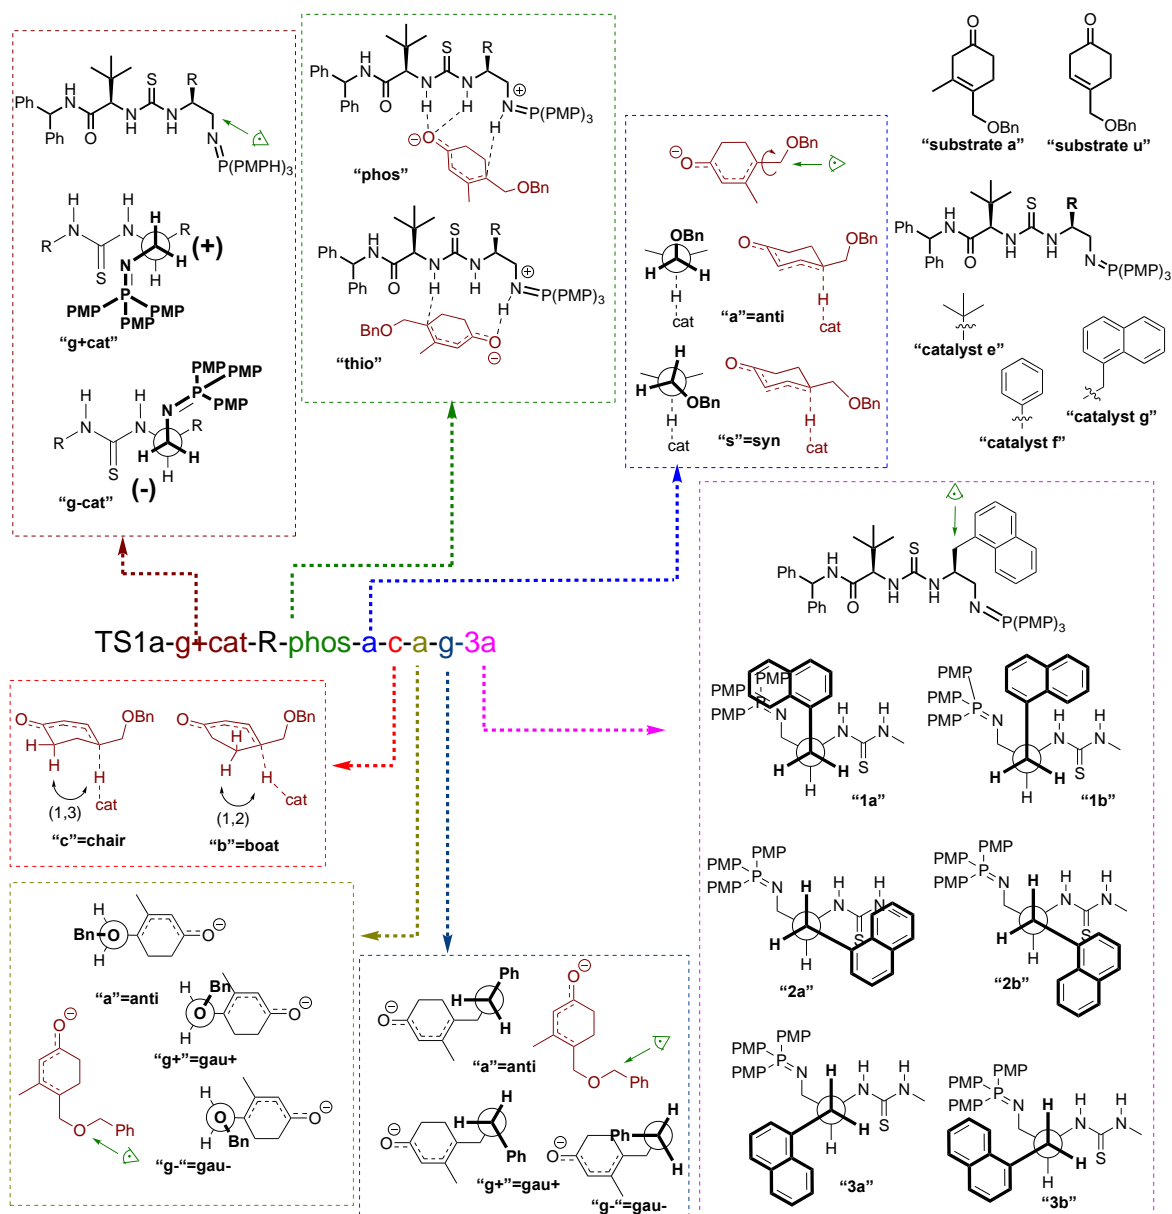

### -Iminophosphorane $pK_{BH^+}$ :

Calculations of iminophosphorane  $pK_{BH^+}$  were carried out using a similar methodology described by Kaljurand and col.<sup>26</sup> for predicting the basicity of phosphazene bases (B3LYP/6-311+(d,p)). In this case we employed SMD solvation model (solvent: acetonitrile) and made a RRHO treatment of the vibrational contributions to the free energy using Goodvibes defaults.<sup>21a-b</sup>

For the calculation of the  $\Delta pK_{BH^+}$  between methyl and PMP substituted BIMP, the Gibbs free energy difference of the following equilibrium was calculated:

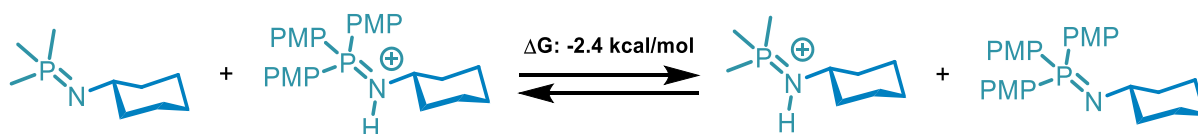

This difference corresponds at r.t. to a difference of 1.7  $pK_a$  units. Based on previous experimental data this would suggest a theoretical iminophosphorane  $pK_{BH^+}$  of approximately 26.7 with trimethylphosphine in acetonitrile.<sup>27</sup>

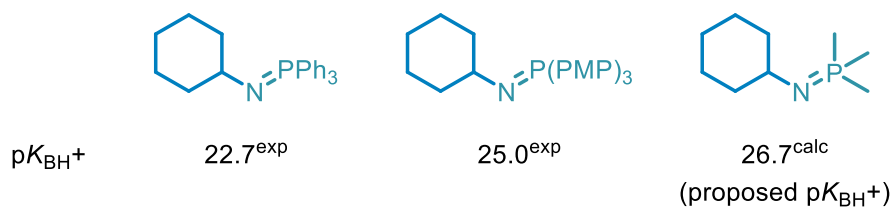

**Multivariate analysis:** We performed a systematic conformational analysis of competing TSs, including varied substrate ring conformations and rotations about single bonds. In the preferred TSs, the thiourea binds the substrate oxygen while the phosphazene participates as proton acceptor and then donor. Alternative modes of N-H proton transfer from the catalyst to substrate from the (thio)urea were much higher in energy and are not expected to contribute to the observed reactivity.

After locating 112 structures within 10 kcal/mol of the most stable reprotonation TS, we reasoned that statistical modelling would enable us to identify geometric features that are correlated with conformational stability and hence enantioselectivity. H-bond distances, transferring N-H/C-H bond distances, cosine of dihedral angles, the dipole moment, distance between catalyst and substrate centers of mass (computed with xTB<sup>28a-c</sup>), and catalyst:substrate D3-dispersion energy (computed with pyDFTD3<sup>29</sup>) were compiled for each TS. Atom numbers below correspond to the numbering used for the dihedral angles. We extracted all heavy-atom dihedrals for the substrate, and all backbone dihedrals of the catalyst. We removed angle terms which were invariant across all of the conformers. The data is provided as a supporting CSV file.

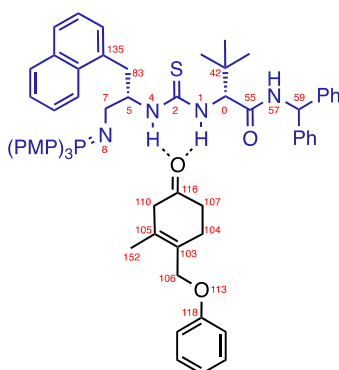

Firstly, we performed a decision tree analysis<sup>30</sup> (with JMP Pro 15.1.0) to understand qualitatively which geometric terms are dominant in determining conformational energies. This simple model shows that four of the dihedral angles in the substrate are influential, two ( $f_{105-103-104-107}$ ,  $f_{103-104-107-116}$ ) in the 6-membered ring, and two involving the orientation of the ether substituent ( $f_{105-103-106-113}$ ,  $f_{103-106-113-118}$ ).

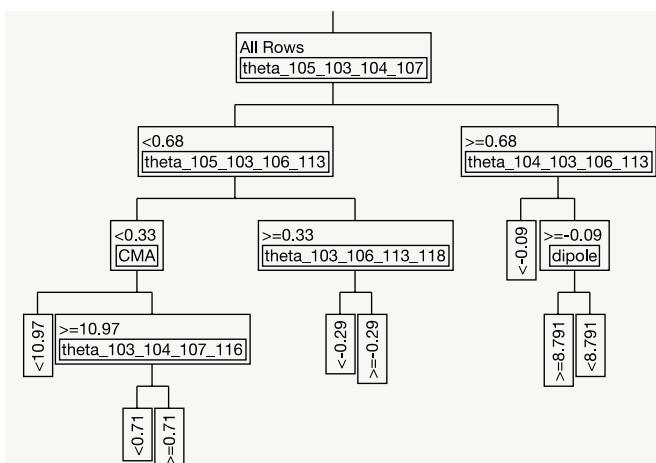

### Actual by Predicted Plot

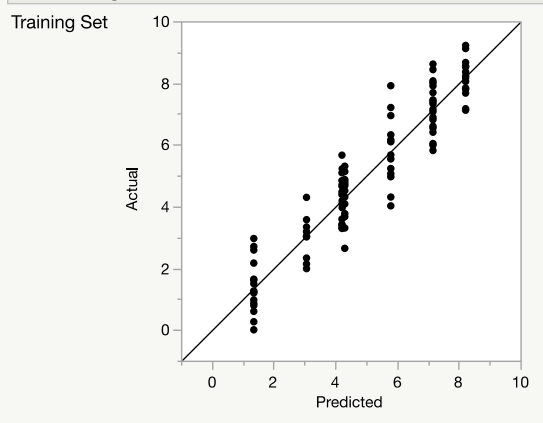

```

## theta_105_103_106_113 0.8629 0.1400 6.165 4.18e-08 ***
## theta_105_103_104_107 1.0431 0.1504 6.933 1.76e-09 ***
## theta_103_106_113_118 0.6647 0.1400 4.747 1.08e-05 ***
## theta_103_104_107_116 0.8976 0.1253 7.164 6.71e-10 ***
## CMA 0.5812 0.1639 3.546 0.000708 ***
## theta_104_103_106_113 0.4181 0.1525 2.742 0.007772 **
## theta_2_4_5_7 -0.3399 0.1309 -2.596 0.011510 *

```

### Crossvalidation

| k-fold   | SSE        | RSquare |
|----------|------------|---------|
| 5 Folded | 74.5446472 | 0.8815  |
| Overall  | 66.1540318 | 0.8948  |

Secondly, we performed a multivariate linear regression (MLR<sup>31</sup>) in *R* (version Version 1.2.5042) to generate a quantitative model to predict conformational energies. We used 70:30 train-test split of the data. Features were standardized and colinear features were removed prior to performing the regression. Parameters were retained which were statistically significant at the 0.1% level of confidence by ANOVA.<sup>32</sup>

Compared against DFT computed conformational energies, an MLR model with 7 terms resulted in an  $R^2$  of 0.85 (compared against a training set of 78 conformers). Compared against the held-out test set of the remaining 34 conformers the  $Q^2$  was 0.80. 5-fold cross-validation  $Q^2$  was also 0.80. The code and output is given below.

We note that alternative models, such as a one-layer neural network give  $R^2$  of 0.97 (70% train) and  $Q^2$  of 0.93 (30% train) give exemplary quantitative predictive performance, but are harder to interpret.

### R code:

```
require('dplyr')
require('cvq2')
require('e1071')
require('caret')
require('corrplot')
require('MASS')
require('tibble')
require('ggplot2')
require('cvq2')
```

**Reading the data:** the first column contains conformer names, the second the relative energies (kcal/mol). All other columns are geometric and electronic features/descriptors. These include dihedral angles, forming/breaking bond distances, hydrogen bond distances, dipole moment, catalyst:substrate D3-dispersion energy, catalyst:substrate center-of-mass distance.

```
data <- read.csv(paste(dataDirectory, 'conformers.csv', sep=""), header = TRUE)
confs <- data[2:ncol(data)]
```

**Processing the data:** we *standardize* (“scale”) the features - each column is transformed into *z-scores*. We then find the correlation between each pair of features and remove colinear features. Where the magnitude of the Pearson correlation coefficient  $r$  is greater than 0.6 we only keep one of the features (of the two features, the one with the higher mean absolute correlation to all other variables is removed).

Plotting the correlations between all variables (including y-values). Having previously removed correlated features there are no intervariable correlations above 0.6. We also see that the y-value is not highly correlated against any singular feature and so a multivariate model is required.

```
# scale all columns except the first (the relative energies, i.e. the 'y-values')
confs[,-1] <- scale(confs[,-1])

## this computed the correlation between columns (apart from the y-values)
comat = cor(confs[,-1])

hc = findCorrelation(comat, cutoff=0.6)

## the features that are highly-correlated are now removed
hc = sort(hc) + 1
confs = confs[,-c(hc)]

# correlation plot using pearson algorithm
comat <- cor(confs)
comatr <- round(comat, 1)
sig <- cor.mtest(confs, conf.level = .95)
corrplot <- corrplot(comatr, p.mat = sig$p, sig.level = c(.001, .01, .05), pch.cex = .9, insig = "1
abel_sig", pch.col = "white",
type = "lower", tl.col = "black", tl.srt = 45, method="square", cl.align = "r", tl.cex = .5)
```

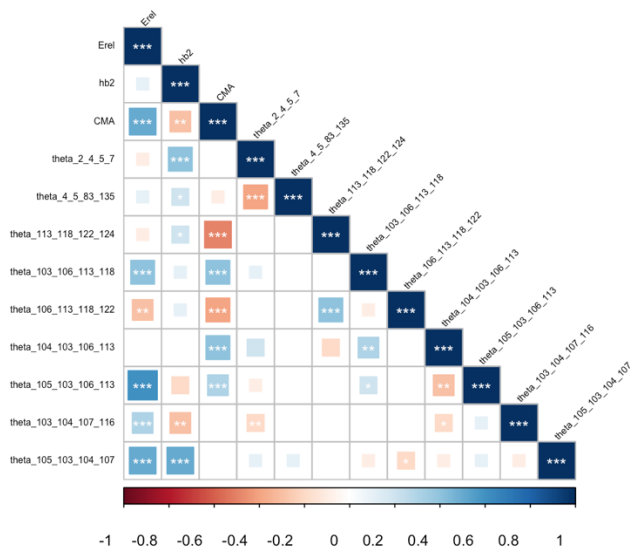



The data is randomly split into train (70%) and test (30%) sets. We will use the random seed 123 to make the partition reproducible. A multivariate linear regression is performed.

```
smp_size <- floor(0.70 * nrow(confs))
set.seed(123)
train_ind <- sample(seq_len(nrow(confs)), size = smp_size)
TRAIN <- confs[train_ind, ]
TEST <- confs[-train_ind, ]

MLR = lm(formula = Erel ~ ., data = TRAIN)
n <- nrow(na.omit(TRAIN))

Stepwise multivariate linear regression
null=lm(Erel~1, data=TRAIN)
full=lm(Erel~ ., data=TRAIN)
MLR =step(null, scope=list(lower=null, upper=full), direction="forward", trace = FALSE) #
TRUE to show all steps

train.predicted <- predict(MLR, TRAIN)

test.predicted <- predict(MLR, TEST)

summary(MLR)

## Call:
## lm(formula = Erel ~ theta_105_103_106_113 + theta_105_103_104_107 +
##   theta_103_106_113_118 + theta_103_104_107_116 + CMA + theta_104_103_106_113
##   +
##   theta_2_4_5_7, data = TRAIN)
##
## Residuals:
##   Min     1Q   Median     3Q      Max
## -2.31183 -0.63251  0.05817  0.56926  2.60499
##
## Coefficients:
##              Estimate Std. Error t value Pr(>|t|)
## (Intercept)      5.0191    0.1152  43.584 < 2e-16 ***
## theta_105_103_106_113  0.8629    0.1400   6.165 4.18e-08 ***
## theta_105_103_104_107  1.0431    0.1504   6.933 1.76e-09 ***
## theta_103_106_113_118  0.6647    0.1400   4.747 1.08e-05 ***
## theta_103_104_107_116  0.8976    0.1253   7.164 6.71e-10 ***
## CMA                0.5812    0.1639   3.546 0.000708 ***
## theta_104_103_106_113  0.4181    0.1525   2.742 0.007772 **
## theta_2_4_5_7        -0.3399    0.1309  -2.596 0.011510 *
## ---
## Signif. codes:  0 '***' 0.001 '**' 0.01 '*' 0.05 '.' 0.1 ' ' 1
##
## Residual standard error: 0.9951 on 69 degrees of freedom
## Multiple R-squared: 0.8526, Adjusted R-squared: 0.8355
```

```
## F-statistic: 49.9 on 8 and 69 DF, p-value: < 2.2e-16
```

### Cross Validation: Hold-out test-Set, leave-one-out, k-fold cross-validation

```
# Q2 (using test data)
MLR_fit = MLR[["call"]][["formula"]]

data_train <- TRAIN [ c(names(MLR$model)[ ]) ]
data_test <- TEST [ c(names(MLR$model)[ ]) ]

result_q2.ext <- q2(data_train, data_test)
result_q2.ext

## -- PREDICTION PERFORMANCE (model and prediction set available)
## #Elements Model Set:      78
## #Elements Prediction Set:  34
##
## mean (observed):  4.6766
## mean (predicted):  4.8543
## rmse (nu = 0):    0.9888
## q^2:      0.8011

# Leave One Out Cross Validation
subset_all <- confs[ c(names(MLR$model)[ ]) ]
result_all.Q2.loo <- looq2(subset_all, MLR_fit)
result_all.Q2.loo

## -- PREDICTION PERFORMANCE (cross validation)
## #Runs:      1
## #Groups:    112
## #Elements Training Set: 111
## #Elements Test Set:    1
##
## mean (observed):  4.9651
## mean (predicted):  4.9637
## rmse (nu = 1):    1.0302
## q^2:      0.8160

# K-fold Cross Validation (K=5)
K = 5 # EDIT to amount of K-fold

result_all.Q2.kfold <- cvq2( subset_all, MLR_fit, nFold = K)
result_all.Q2.kfold

## -- PREDICTION PERFORMANCE (cross validation)
## #Runs:      1
## #Groups:    5
## #Elements Training Set: 89 (+1)
```

```
## #Elements Test Set: 23 (-1)
##
## mean (observed): 4.9651
## mean (predicted): 4.9452
## rmse (nu = 1): 1.0863
##  $q^2$ : 0.7969
```

### Plot the model-predicted against actual values

```
#train data set
train.actual = TRAIN$Erel
train.frame = tibble(train.predicted, train.actual)
#train.frame

#test data set
test.actual = TEST$Erel
test.frame = tibble(test.predicted, test.actual)

# plotting function
ggplotRegression <- function (MLR) {

  q = ggplot(train.frame, aes( x = train.actual , y = train.predicted , color="Train" )) +
    geom_point() +
    xlab("DFT Relative Energy (kcal/mol)") +
    ylab("Predicted Relative Energy (kcal/mol)") +
    ggtitle( paste("Multivariate Regression Model: ", signif(nrow(TRAIN)/nrow(confs)*100, 2
), "% Train: ", signif(nrow(TEST)/nrow(confs)*100, 2), "% Test" ) ) +
    theme_classic() +
    theme(plot.title = element_text(hjust = 0.5)) +
    labs( subtitle = MLR[["call"]][["formula"]] ) +
    stat_smooth(method = "lm", col= "black") +
    labs(caption = paste("R2 = ",signif(summary(MLR)$r.squared, 2)) )
  q + geom_point(data=test.frame, aes(x=test.actual, y=test.predicted, color="Test"))
}

qq <- ggplotRegression(MLR); qq
```

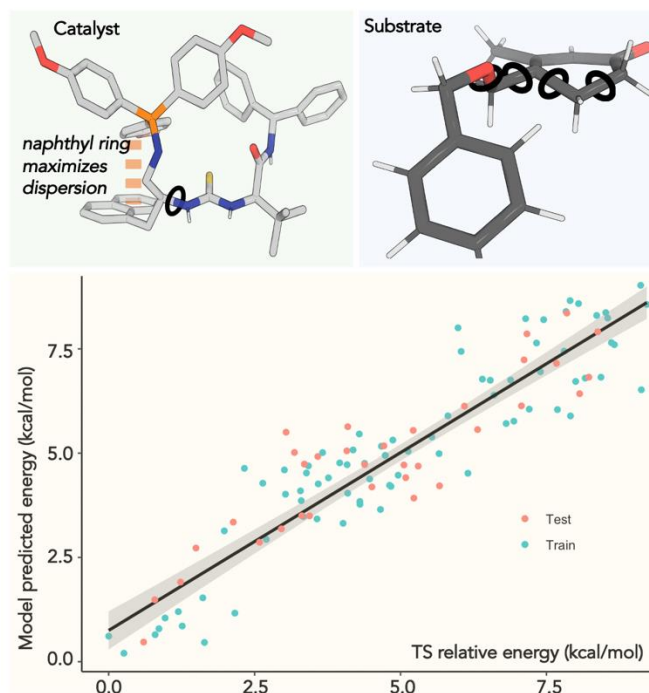

**Interpretation:** One dihedral angle in BIMP catalyst **3i** have a significant influence on TS conformational energies. An intramolecular dispersion interaction between the naphthyl ring and one of the P-aryl groups favors the conformation shown. Rotation of this dihedral angle (marked) on the LHS of the catalyst structure away from the conformation shown causes an increase in energy. These conformational features are conserved in the catalyst across the more stable (*R*) and (*S*) transition structures. In common with the decision tree analysis, the same dihedrals in the substrate are significant in their influence on the relative energy. The exocyclic dihedrals in the substrate are decisive in terms of enantioselectivity and differ between (*R*) and (*S*) structures.

### 3. References

- (1) (a) Juliá-Hernández, F.; Arcas, A.; Vicente, J. Pd(II)-Catalyzed Deprotection of Acetals and Ketals Containing Acid Sensitive Functional Groups. *Tetrahedron Lett.* **2014**, *55*, 1141. (b) Garcia, A.; Hernandez, J. COMPLEJO ORGANOMETALICO DE PD (II) Y SU USO EN LA HIDROLISIS DE CETALES Y ACETALES **2012**, ES 2372457.
- (2) Jones G. B.; Wright J. M.; Hynd G.; Wyatt J. K.; Warner P. M.; Huber R. S.; Li A.; Kilgore M. W.; Sticca R. P.; Pollenz R. S. Oxa-Enediynes: Probing the Electronic and Stereoelectronic Contributions to the Bergman Cycloaromatization. *J. Org. Chem.*, **2002**, *67*, 5727.
- (3) Ishikawa, H.; Bondzic, B. P.; Hayashi, Y. Synthesis of (-)-Oseltamivir by Using a Microreactor in the Curtius Rearrangement. *Eur. J. Org. Chem.* **2011**, *2011*, 6020.
- (4) Iyer, A.; Jockusch, S.; Sivaguru, J. A Photo-Auxiliary Approach – Enabling Excited State Classical Phototransformations with Metal Free Visible Light Irradiation. *Chem. Commun.* **2017**, *53*, 1692.
- (5) Murar, C. E.; Thuaud, F.; Bode, J. W. KAHA Ligations That Form Aspartyl Aldehyde Residues as Synthetic Handles for Protein Modification and Purification. *J. Am. Chem. Soc.* **2014**, *136*, 18140.
- (6) Kuttner, J. R.; Warratz, S.; Hilt, G. Straightforward Synthesis of Nonconjugated Cyclohex-3-Enone and Conjugated 4-Methylenecyclohex-2-Enone Derivatives. *Synthesis (Stuttg.)*. **2012**, *44*, 1293.
- (7) Zhang, H.; Li, C.; Xie, G.; Wang, B.; Zhang, Y.; Wang, J. Zn(II)- or Rh(I)-Catalyzed Rearrangement of Silylated [1,1'-Bi(Cyclopropan)]-2'-En-1-Ols. *J. Org. Chem.* **2014**, *79*, 6286.
- (8) (a) Smith, A. B.; Nolen, E. G.; Shirai, R.; Blase, F. R.; Ohta, M.; Chida, N.; Hartz, R. A.; Fitch, D. M.; Clark, W. M.; Sprengeler, P. A. Tremorgenic Indole Alkaloids. 9. Asymmetric Construction of an Advanced F-G-H-Ring Lactone Precursor for the Synthesis of Penitrem D. *J. Org. Chem.* **1995**, *60*, 7837. (b) Barco, A.; Benetti, S.; Bianchi, A.; Casolari, A.; Pollini, G. P.; Romagnoli, R.; Spalluto, G.; Zanirato, V. Enantioselective Synthesis of the Hexahydronaphthalene Nucleus of (-)-Compactin from Ethyl (1R,2S)-2-Methyl-4-Oxocyclohexanecarboxylate and 2-(3-Nitropropyl)-1,3-Dioxolane as Four Carbon Bifunctional Annelating Agent. *Tetrahedron* **1994**, *50*, 11743.
- (9) Yamaguchi, S.; Ura, M.; Izuta, S.; Okamoto, A. Chemically Activatable Alkyne Tag for Low PH-Enhanced Molecular Labeling on Living Cells. *Bioconjugate. Chem.* **2016**, *27*, 1976.
- (10) (a) Stork, G.; Tang, P. C.; Casey, M.; Goodman, B.; Toyota, M. Regiospecific and Stereoselective Synthesis of (±)-Reserpine and (-)-Reserpine. *J. Am. Chem. Soc.* **2005**, *127*, 16255. (b) Kozmin, S. A.; Rawal, V. H. Chiral Amino Siloxy Dienes in the Diels-Alder Reaction: Applications to the Asymmetric Synthesis of 4-Substituted and 4,5-Disubstituted Cyclohexenones and the Total Synthesis of (-)- $\alpha$ -Elemene. *J. Am. Chem. Soc.* **1999**, *121*, 9562. (c) Jiang, G.-J.; Fu, X.-F.; Li, Q.; Yu, Z.-X. Rh(I)-Catalyzed [5 + 1] Cycloaddition of Vinylcyclopropanes and CO for the Synthesis of  $\alpha,\beta$ - and  $\beta,\gamma$ -Cyclohexenones. *Org. Lett.* **2012**, *14*, 692.

- (11) Buzas, A.; Gagosz, F. Gold(I) Catalyzed Isomerization of 5-En-2-Yn-1-Yl Acetates: An Efficient Access to Acetoxy Bicyclo[3.1.0]Hexenes and 2-Cycloalken-1-Ones. *J. Am. Chem. Soc.* **2006**, *128*, 12614.
- (12) Li, Y.; Li, J. X.; Ouyang, X. H.; Wang, Q. A.; Li, J. H. Manganese-Catalyzed Intermolecular Oxidative Annulation of Alkynes with  $\gamma$ -Vinyl Aldehydes: An Entry to Bridged Carbocyclic Systems. *Org. Lett.* **2017**, *19*, 6172.
- (13) Oriyama, T.; Kobayashi, Y.; Noda, K. Chemoselective and Practical Deprotection of Alkyl Trialkylsilyl Ethers in the Presence of Aryl Trialkylsilyl Ethers by a Catalytic Amount of Sc(OTf)<sub>3</sub>. *Synlett* **1998**, *10*, 1047.
- (14) Iwasa, S.; Yamamoto, M.; Kohmoto, S.; Yamada, K. Synthesis of Thionolactones from Homoallylic Xanthates. *J. Chem. Soc. Perkin Trans. 1* **1991**, *0*, 1173.
- (15) Chong, H.-S.; Song, H. A.; Dadwal, M.; Sun, X.; Sin, I.; Chen, Y. Efficient Synthesis of Functionalized Aziridinium Salts. *J. Org. Chem.* **2010**, *75*, 219.
- (16) Farley, A. J. M.; Sandford, C.; Dixon, D. J. Bifunctional Iminophosphorane Catalyzed Enantioselective Sulfa-Michael Addition to Unactivated  $\alpha$ -Substituted Acrylate Esters. *J. Am. Chem. Soc.* **2015**, *137*, 15992.
- (17) Whalen, D. L.; Weimaster, J. F.; Ross, A. M.; Radhe, R. Mechanism of the Acid- and General-Base-Catalyzed Conjugation of 3-Cyclopentenone and 3-Cyclohexenone; Electrostatic Effects in the Conjugation of  $\beta,\gamma$ -Unsaturated Ketones. *J. Am. Chem. Soc.* **1976**, *98*, 7319.
- (18) Frisch, M. J. *et al.*, Gaussian 16, Revision B.01, Gaussian, Inc., Wallingford CT, 2016
- (19) Zhao, Y.; Truhlar, D. The M06 suite of density functionals for main group thermochemistry, thermochemical kinetics, noncovalent interactions, excited states, and transition elements: two new functionals and systematic testing of four M06-class functionals and 12 other functionals. *Theor. Chem. Acc.* **2008**, *120*, 215.
- (20) Marenich, A.V.; Cramer, C. J.; Truhlar, D. G. Universal Solvation Model Based on Solute Electron Density and on a Continuum Model of the Solvent Defined by the Bulk Dielectric Constant and Atomic Surface Tensions. *J. Phys. Chem. B.* **2009**, *113*, 6378.
- (21) (a) Grimme, S. Supramolecular Binding Thermodynamics by Dispersion-Corrected Density Functional Theory. *Chem. Eur. J.* **2012**, *18*, 9955; (b) I. Funes-Ardoiz, R. S. Paton, (2016) GoodVibes v3.0.1. <http://doi.org/10.5281/zenodo.595246>
- (22) Kesharwani, M. K.; Brauer, B.; Martin, J. M. Frequency and Zero-Point Vibrational Energy Scale Factors for Double-Hybrid Density Functionals (and Other Selected Methods): Can Anharmonic Force Fields Be Avoided? *J. Phys. Chem. A.* **2015**, *119*, 1701.
- (23) Simón, L.; Paton, R. S. The True Catalyst Revealed: The Intervention of Chiral Ca and Mg Phosphates in Brønsted Acid Promoted Asymmetric Mannich Reactions. *J. Am. Chem. Soc.* **2018**, *140*, 5412.
- (24) The PyMOL Molecular Graphics System, Version 1.8 Schrödinger, LLC

- (25) Peng, Q.; Duarte, F.; Paton, R. S. Computing Organic Stereoselectivity – from Concepts to Quantitative Calculations and Predictions. *Chem. Soc. Rev.* **2016**, *45*, 6093.
- (26) Kaljurand, I.; Saame, J.; Rodima, T.; Koppel, I.; Koppel, I. A.; Kogel, J. F.; Sundermeyer, J.; Kohn, U.; Coles, M. P.; Leito, I. Experimental Basicities of Phosphazene, Guanidinophosphazene, and Proton Sponge Superbases in the Gas Phase and Solution. *J. Phys. Chem. A.* **2016**, *120*, 2591.
- (27) Núñez, M. G.; Farley, A. J. M.; Dixon, D. J. Bifunctional Iminophosphorane Organocatalysts for Enantioselective Synthesis: Application to the Ketimine Nitro-Mannich Reaction. *J. Am. Chem. Soc.* **2013**, *135*, 16348.
- (28) (a) Grimme, S.; Bannwarth, C.; Shushkov, P. A Robust and Accurate Tight-Binding Quantum Chemical Method for Structures, Vibrational Frequencies, and Noncovalent Interactions of Large Molecular Systems Parametrized for All spd-Block Elements ( $Z = 1-86$ ) *J. Chem. Theory Comput.* **2017**, *13*, 1989; (b) Bannwarth, C.; Ehlert, S.; Grimme, S. GFN2-xTB—An Accurate and Broadly Parametrized Self-Consistent Tight-Binding Quantum Chemical Method with Multipole Electrostatics and Density-Dependent Dispersion Contributions. *J. Chem. Theory Comput.* **2019**, *15*, 1652; (c) Pracht, P.; Caldeweyher, E.; Ehlert, S.; Grimme, S.; *ChemRxiv* **2019**, DOI: 10.26434/chemrxiv.8326202.v1
- (29) Paton Lab. (2019, August 11). pyDFTD3: version 1.0 (Version v1.0). Zenodo. <http://doi.org/10.5281/zenodo.3365475>
- (30) Banerjee, S.; Sreenithya, A.; Sunoj, R. B. Machine learning for predicting product distributions in catalytic regioselective reactions. *Chem. Chem. Phys.* **2018**, *20*, 18311.
- (31) Santiago, C. B.; Guo, J.-Y.; Sigman, M. S. Predictive and mechanistic multivariate linear regression models for reaction development *Chem. Sci.* **2018**, *9*, 2398.
- (32) Ardkhean, R.; Mortimore, M.; Paton, R. S.; Fletcher, S. P. Copper Catalysed Asymmetric Conjugate addition to  $\beta$ -substituted cyclopentenone forming quaternary centres with the aid of Quantitative Structure-Selectivity relationship. *Chem. Sci.* **2018**, *9*, 2628.
